# Supplementary material for: BMI and all cause mortality: systematic review and non-linear dose-response meta-analysis of 230 cohort studies with 3.74 million deaths among 30.3 million participants
Source: PubMed Central journal article supplement — BMJ. 2016 May 5;353:i2156. doi: 10.1136/bmj.i2156 (PMC4856854; doi:10.1136/bmj.i2156), 2016-05-05

Supplement to Aune D, Sen A, Prasad M, Norat T, Janszky I, Tonstad S, Romundstad P, Vatten LJ. BMI and all cause mortality: a systematic review and non-linear dose-response meta-analysis of 230 cohort studies with 3.74 million deaths among 30.3 million participants. *BMJ* 2016;353:i1256

**Appendix 3:** Supplementary figures [posted as supplied by author]

Fig A. BMI and all cause mortality, never smokers, linear dose-response analysis, per 5 units

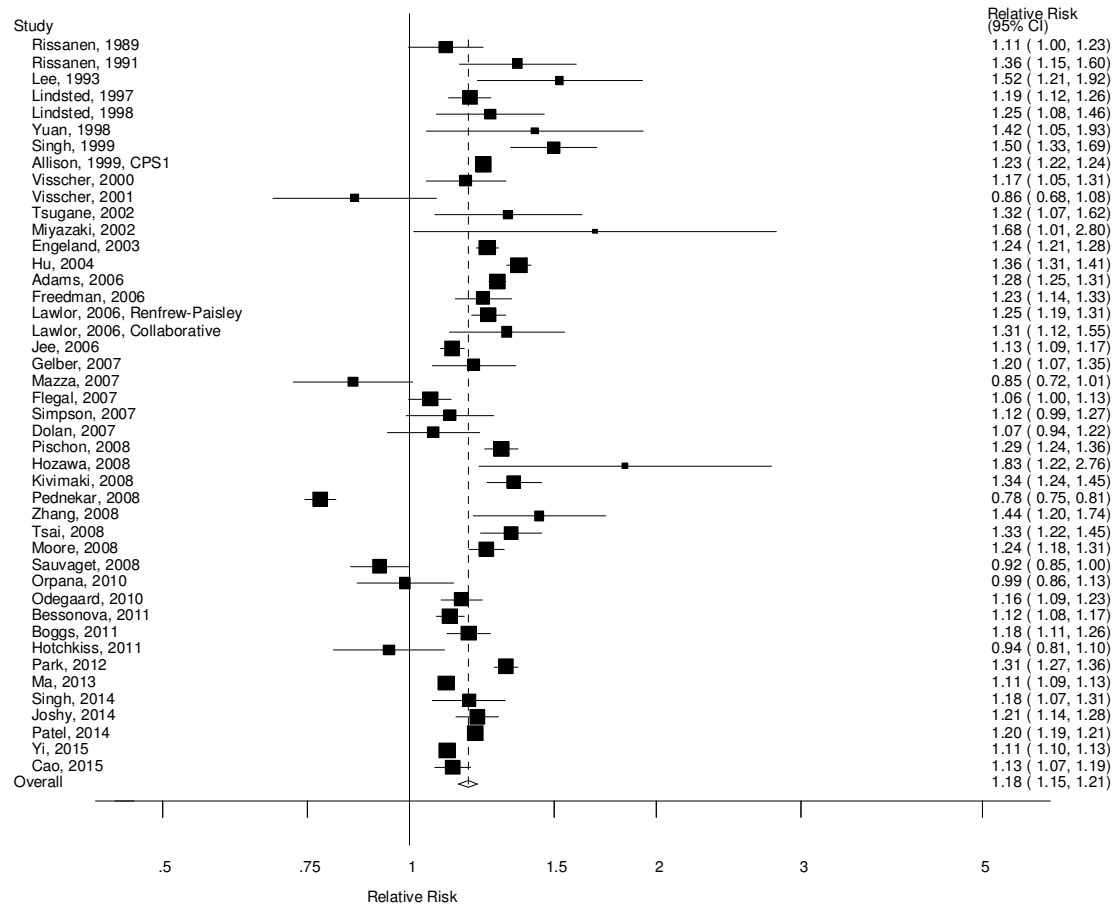

Fig B. Funnel plot of BMI and all cause mortality (never smokers)

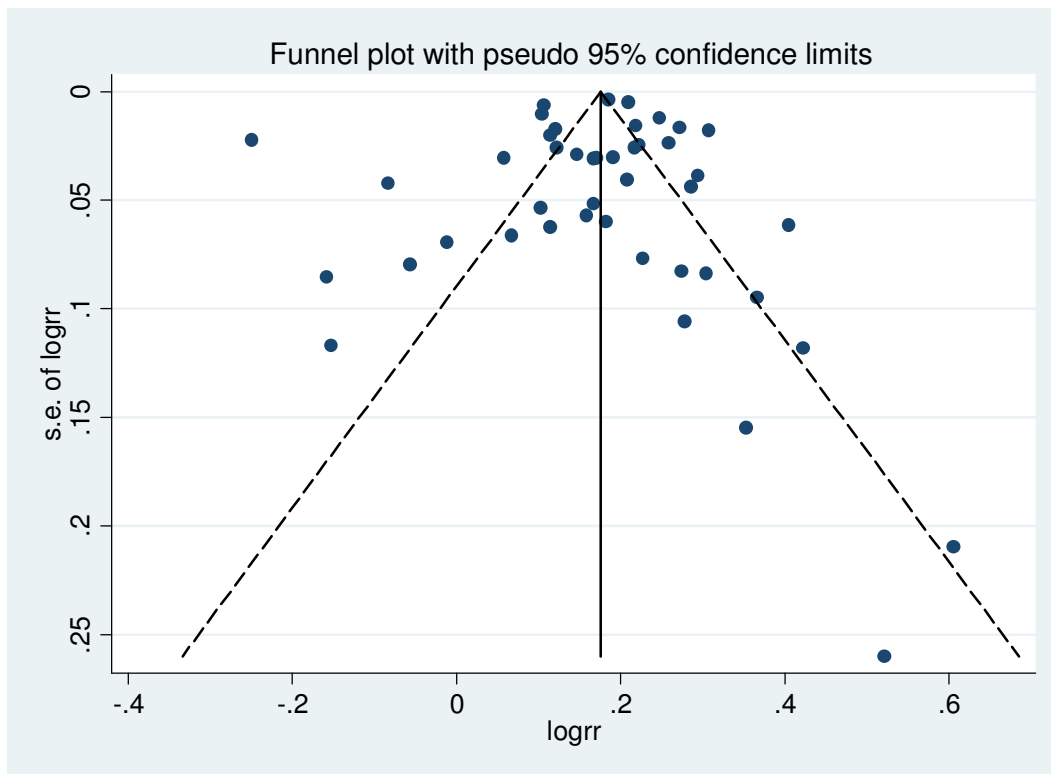

Fig. C. BMI and all cause mortality, never smokers, African Americans, linear dose-response

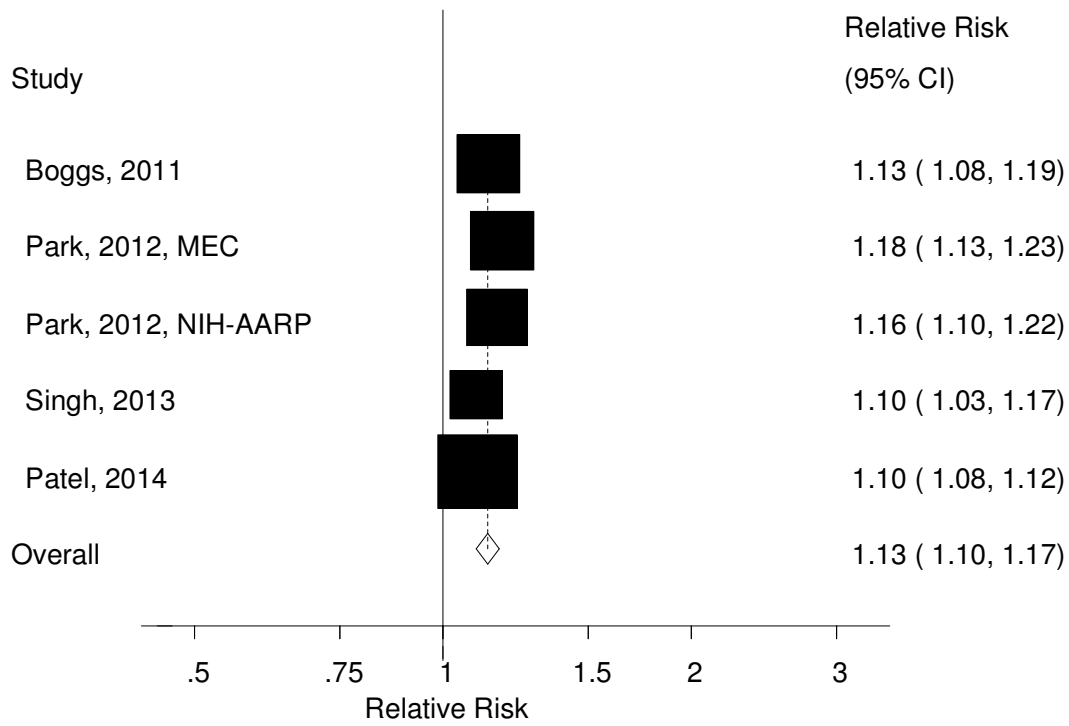

Fig D. BMI and all cause mortality, never smokers, African Americans, nonlinear dose-response

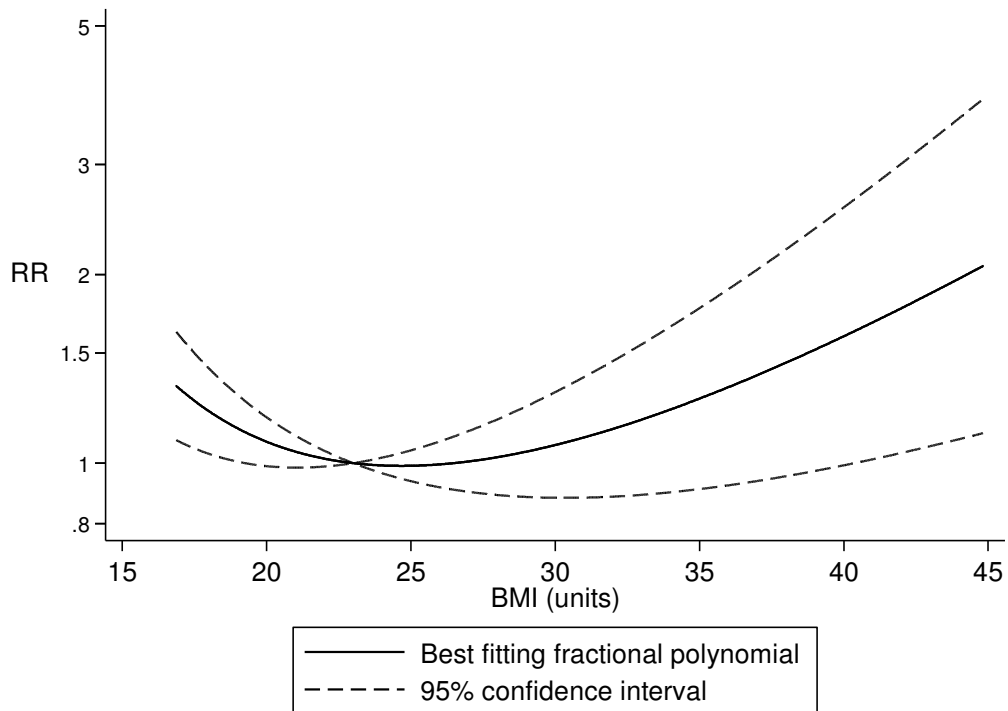

Fig E. BMI and all cause mortality, healthy never smokers, dose-response analysis, per 5 units

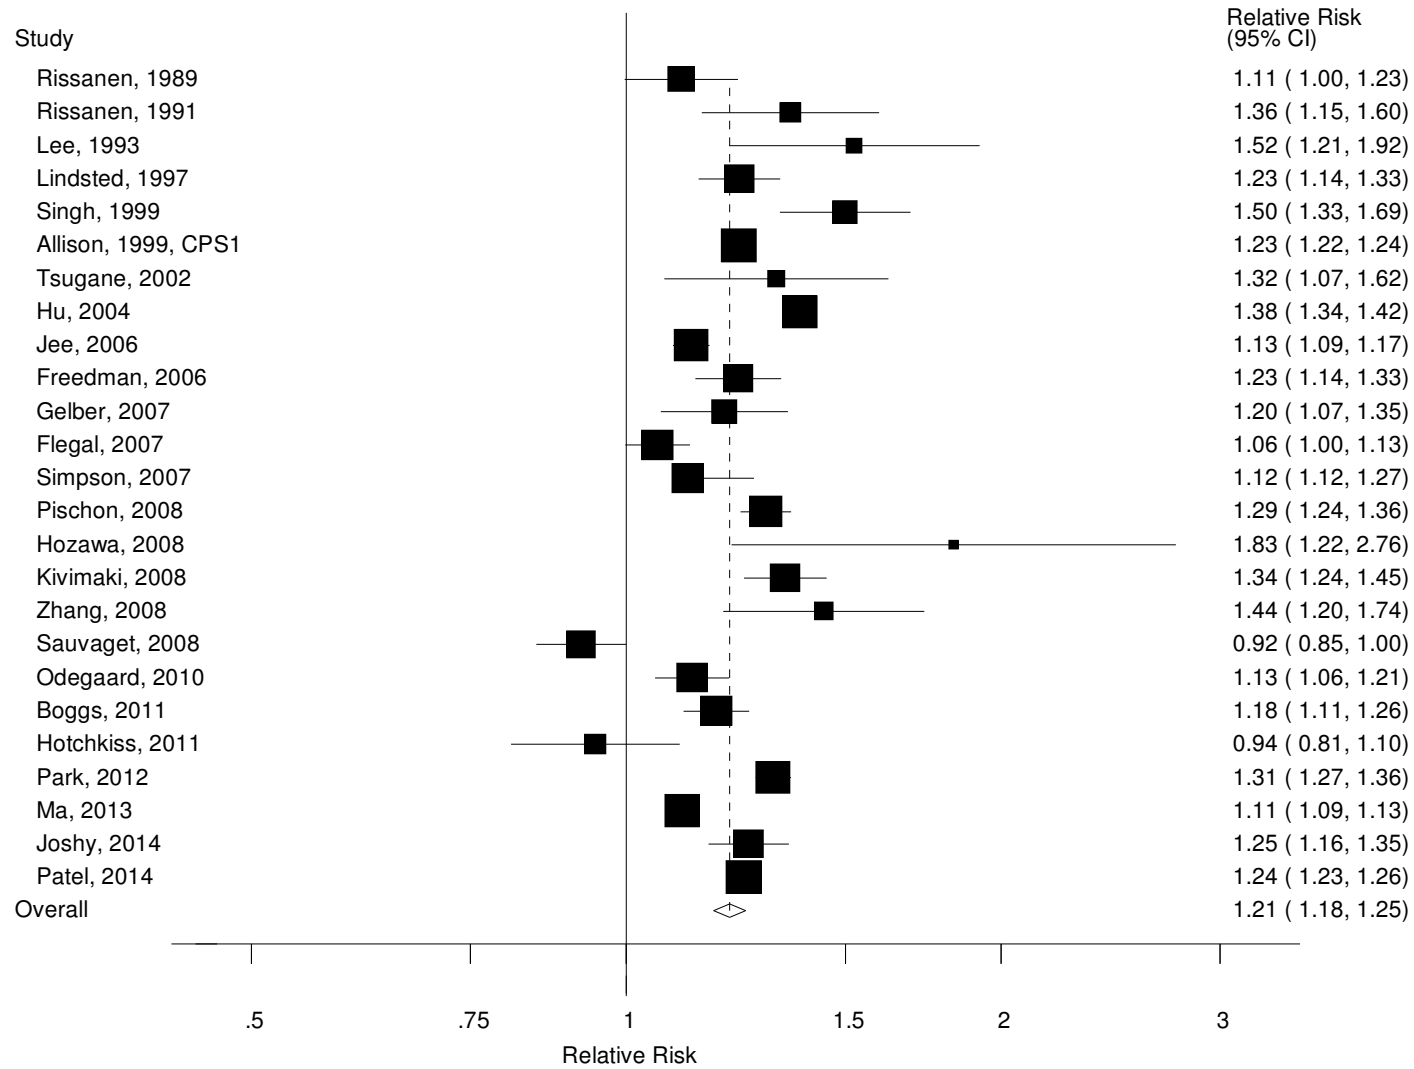

Fig F. BMI and all cause mortality, healthy never smokers, excluding early follow-up, dose-response analysis, per 5 units

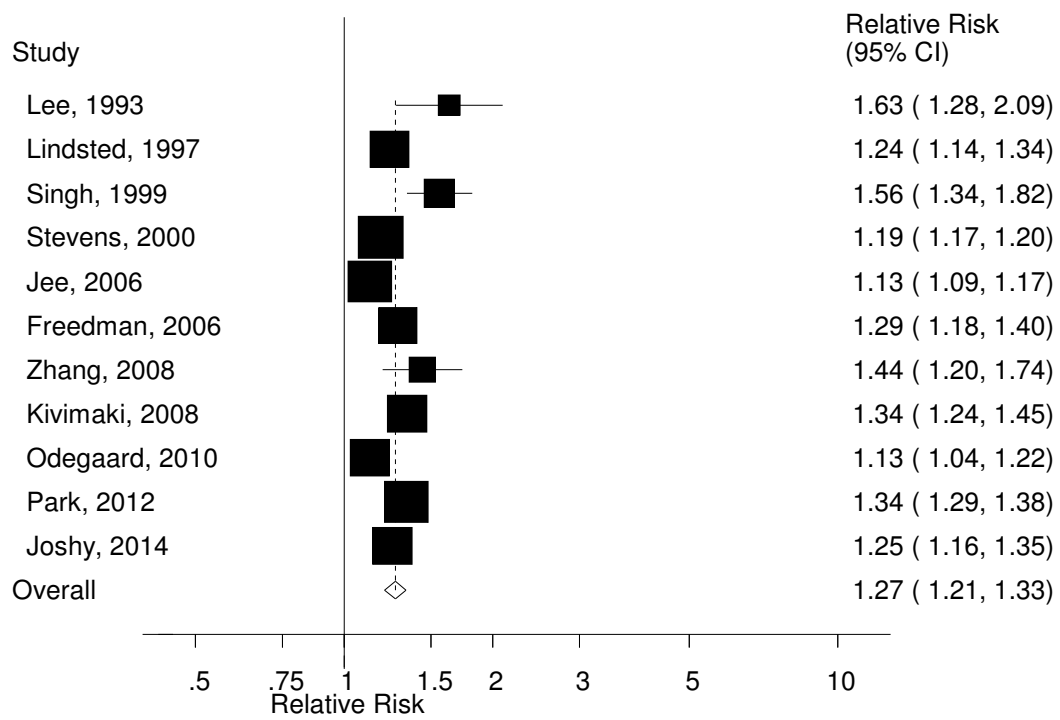

Fig G. BMI and all cause mortality, all participants, dose-response analysis, per 5 units\*

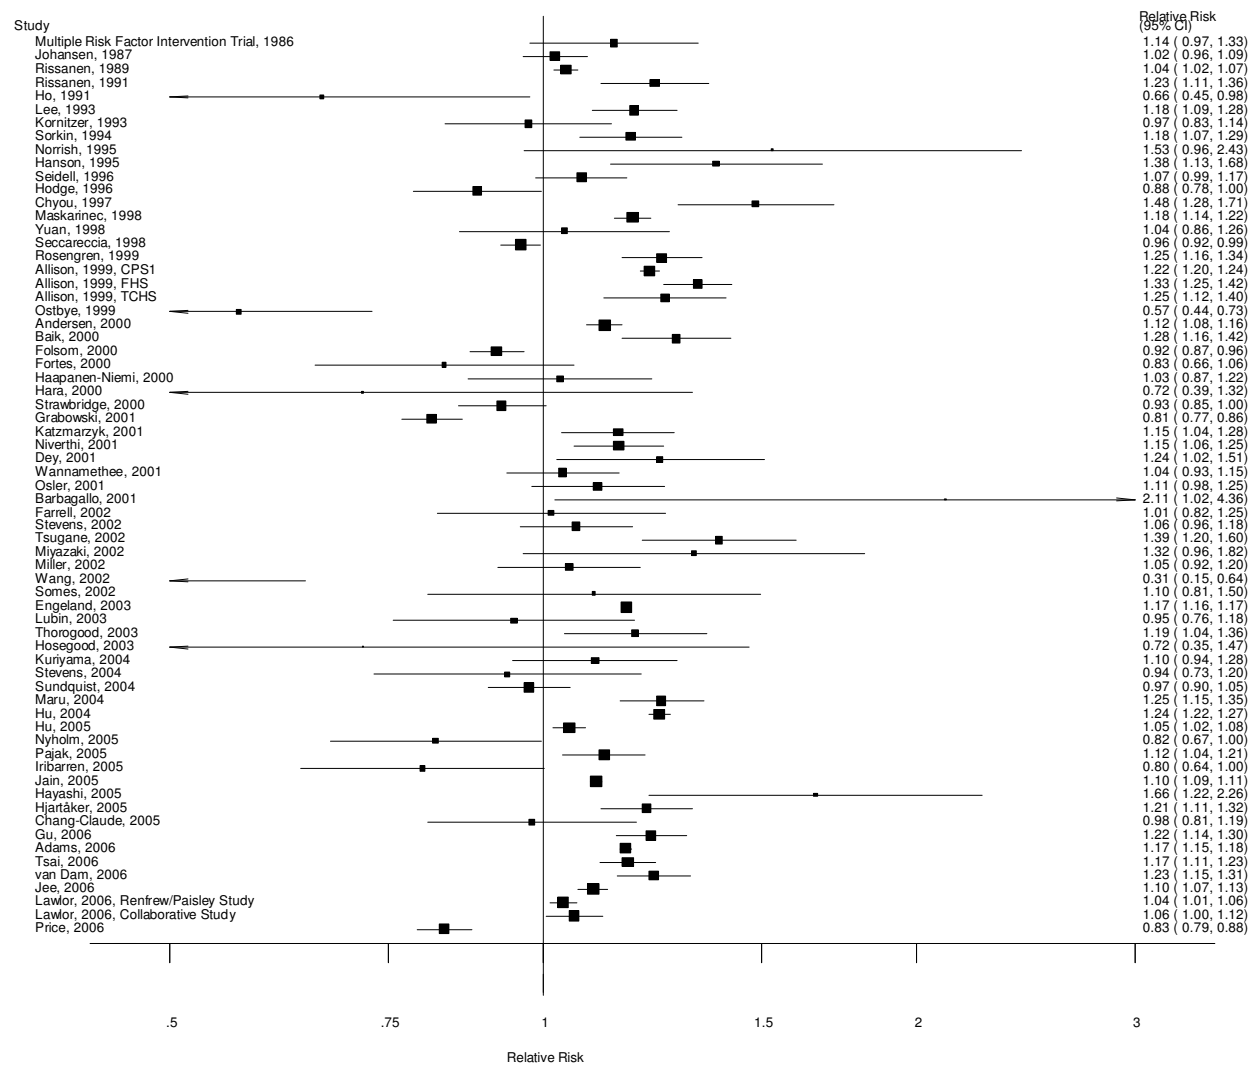

Fig G (continued). BMI and all cause mortality, all participants, dose-response analysis, per 5 units

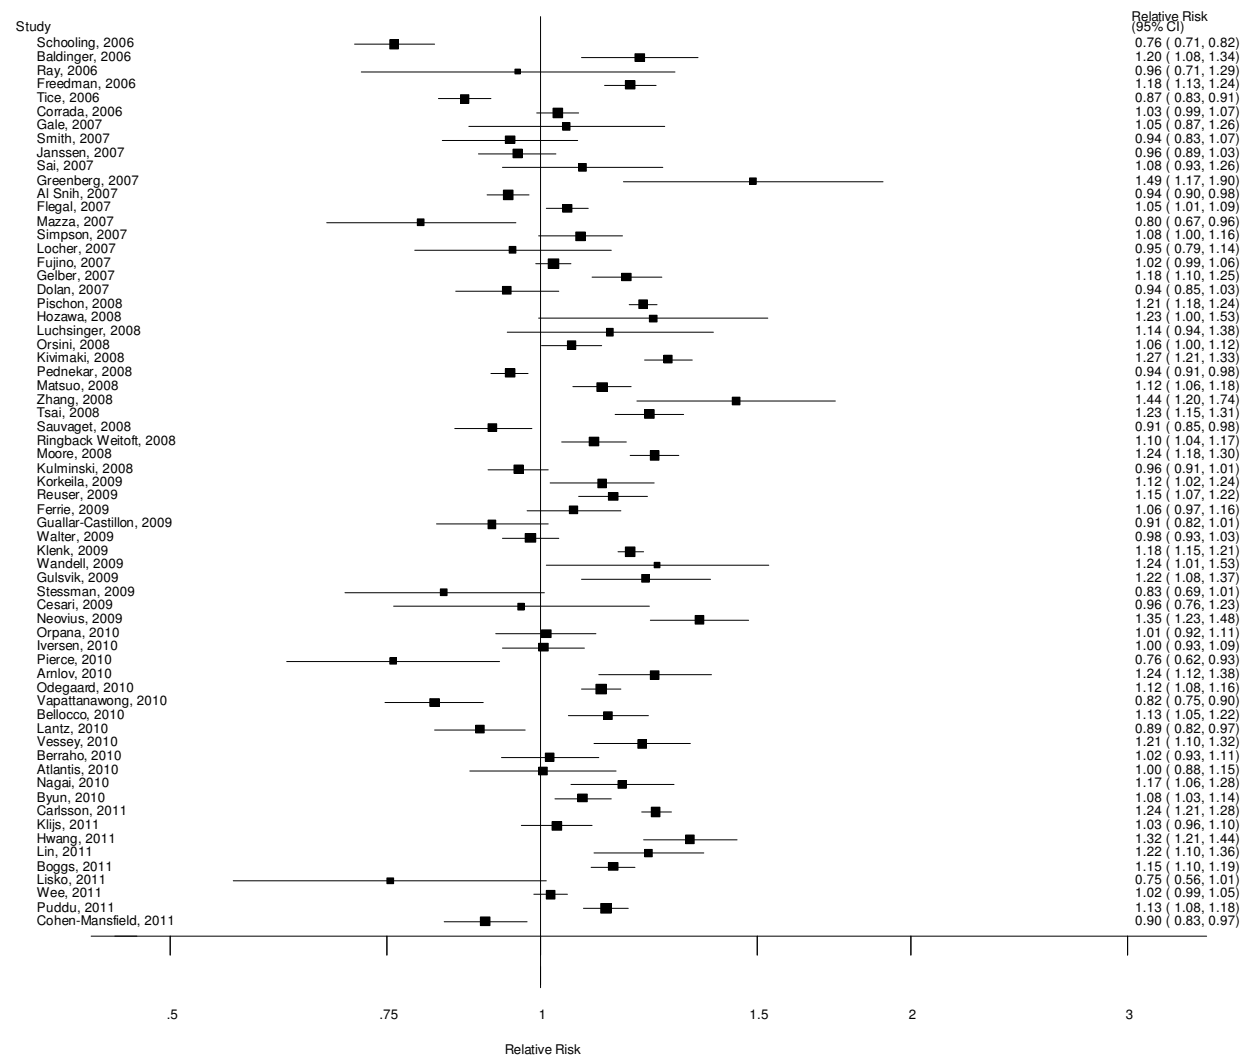

Fig G (continued). BMI and all cause mortality, all participants, dose-response analysis, per 5 units

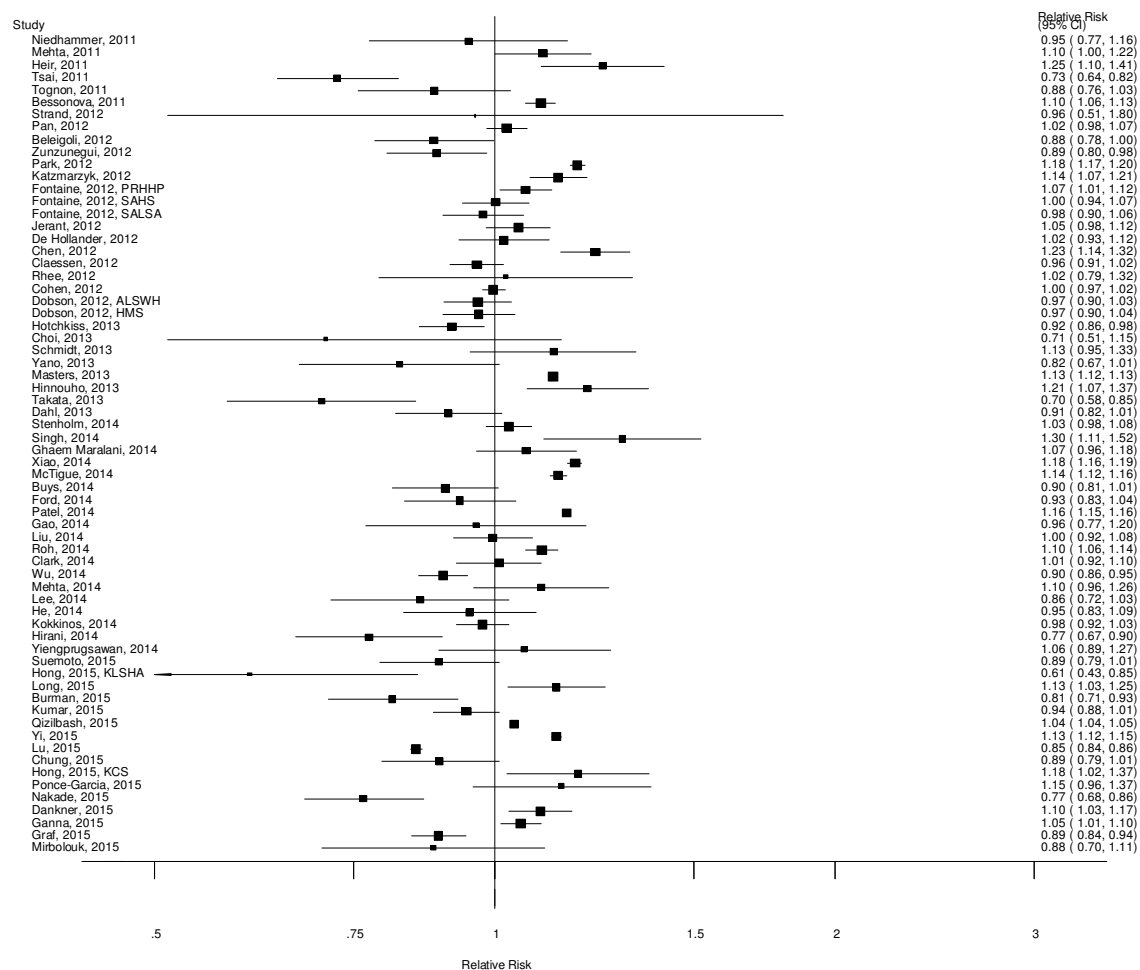

\* Because of the large number of studies the figure had to be divided into three different parts and because of this it was not possible to show the summary RR at the bottom like in the other figures. Summary RR=1.05 (95% CI: 1.04-1.07,  $I^2=97.1%$ ,  $p_{\text{heterogeneity}} < 0.0001$ ).



Fig H. Funnel plot of BMI and all cause mortality (all participants)

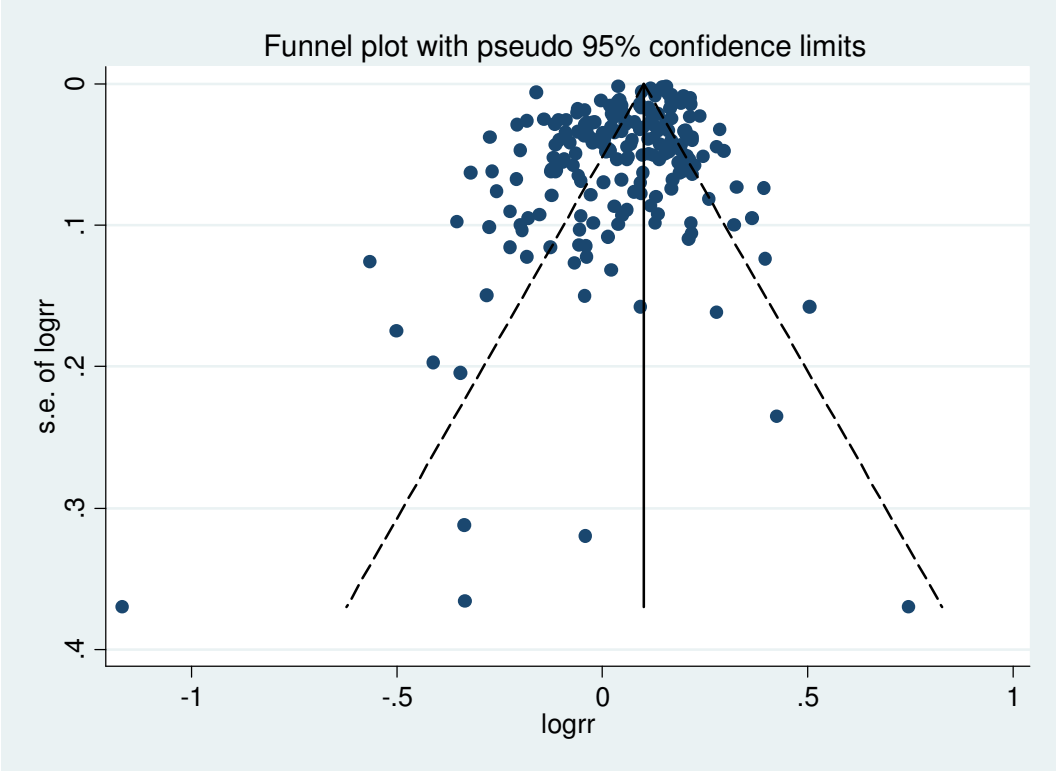

Fig I. BMI and all cause mortality, never smokers, by sex

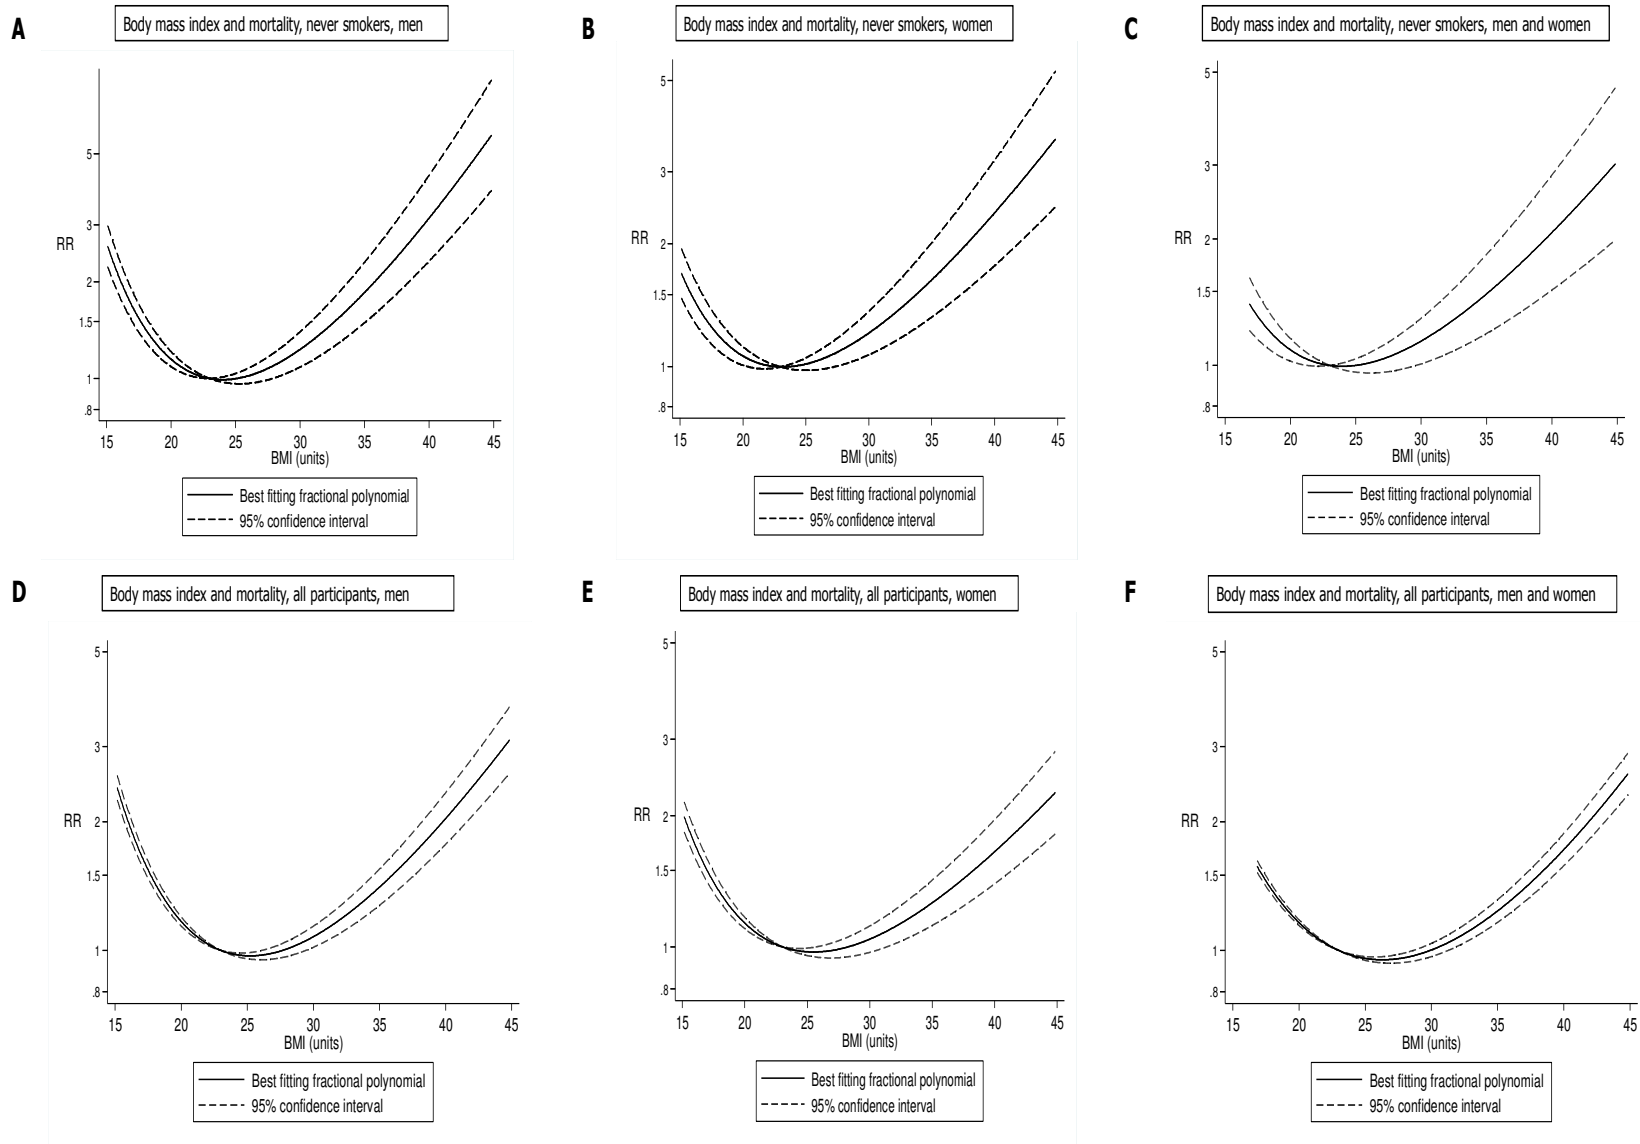

Fig J. BMI and all cause mortality, never smokers, by geographic location

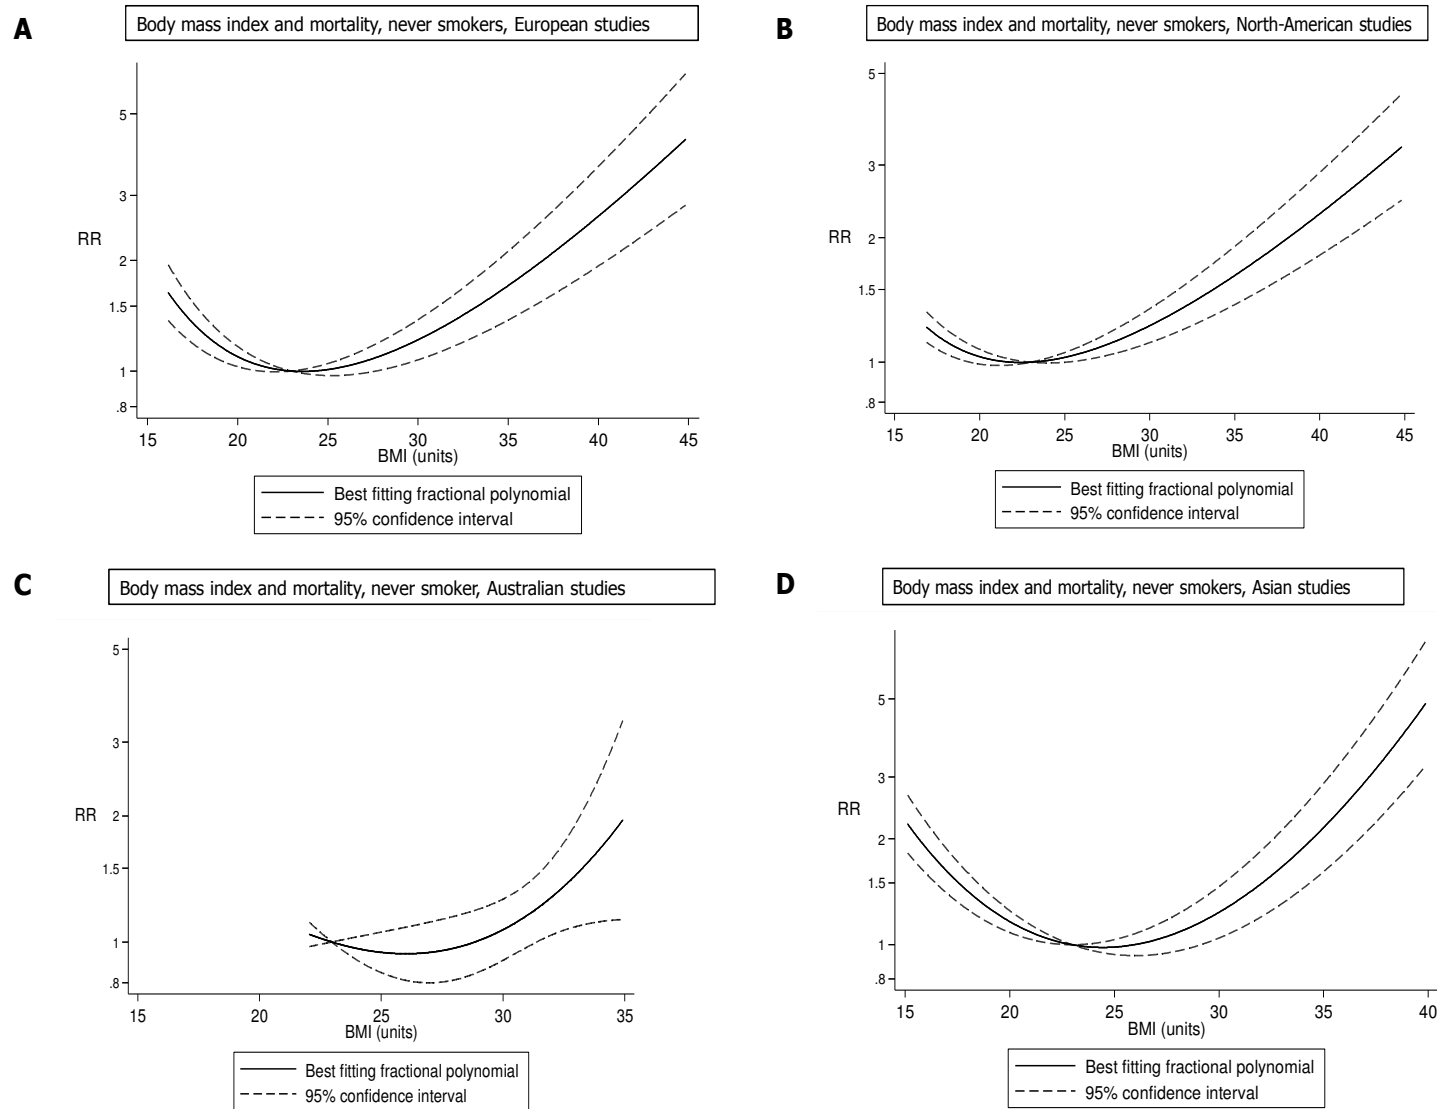

Fig K. BMI and all cause mortality, all participants, study quality=4-6

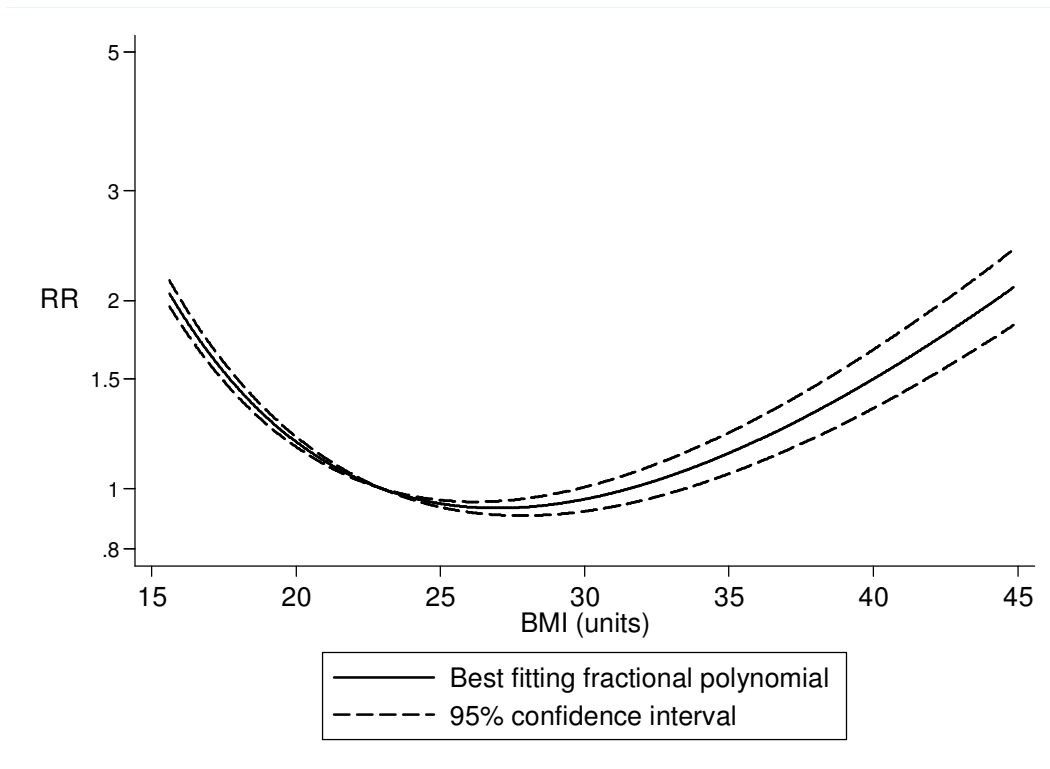

Fig L. BMI and all cause mortality, all participants, study quality=7-9

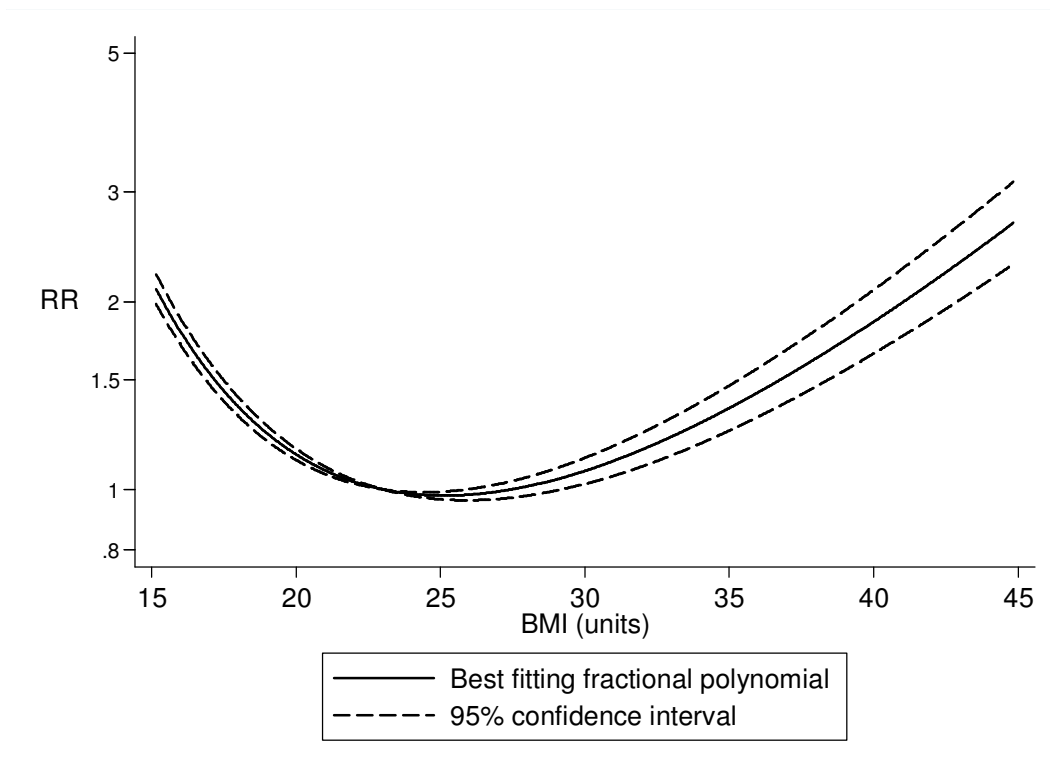

Fig M. BMI and all cause mortality, never smokers, study quality = 4-6

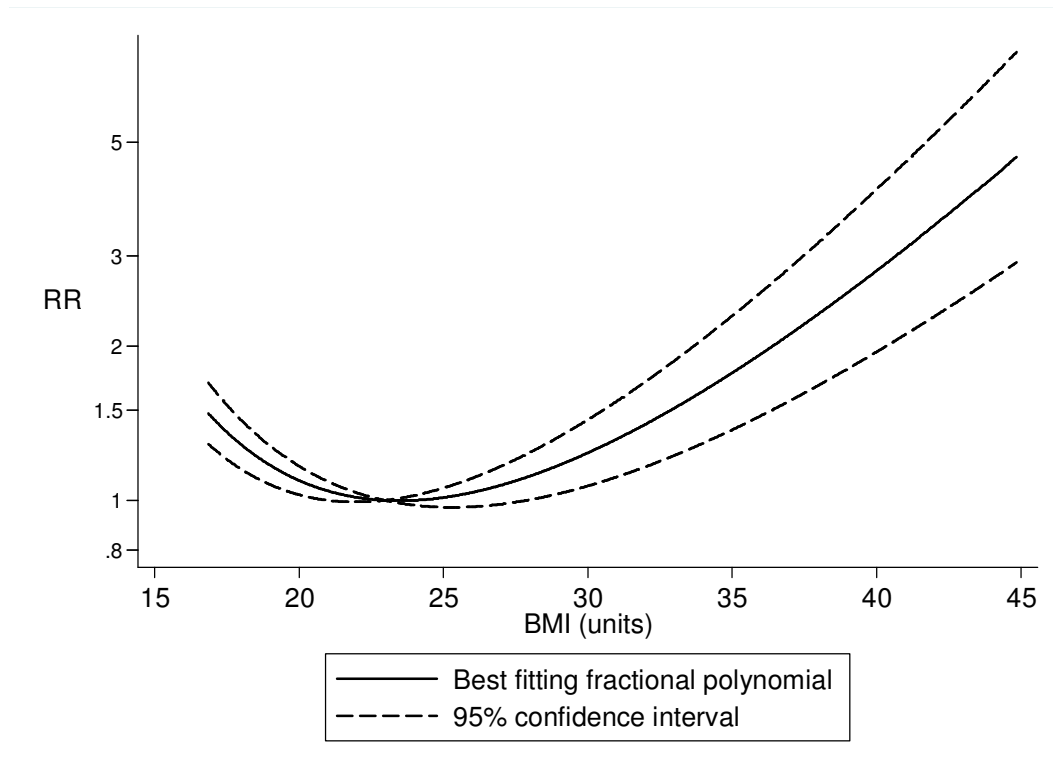

Fig N. BMI and all cause mortality, never smokers, study quality = 7-9

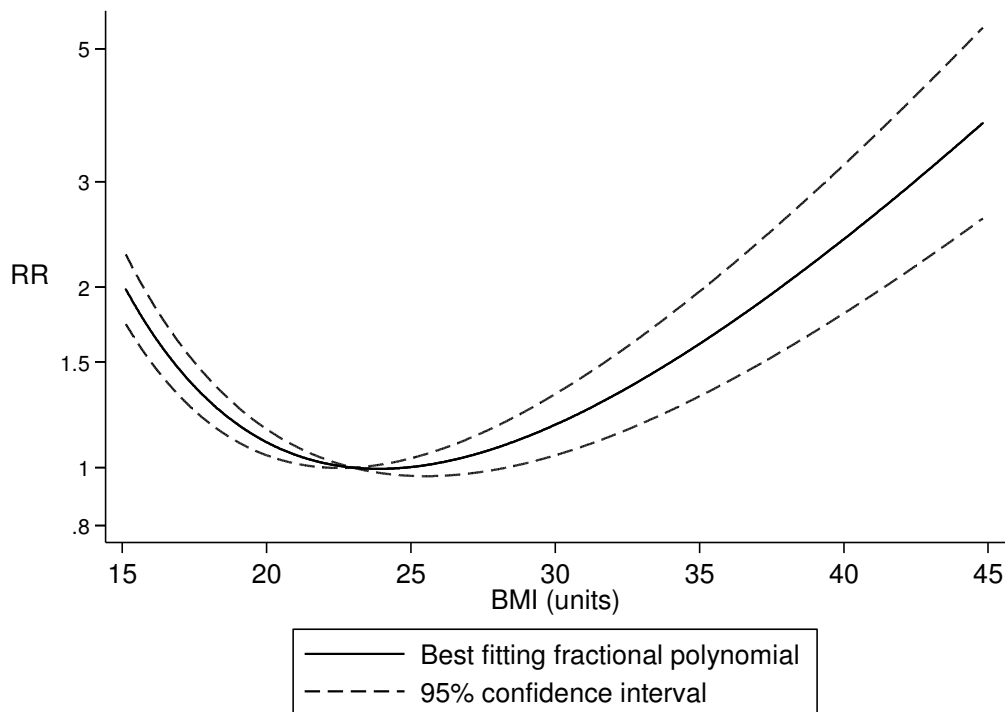

Fig O. BMI and all cause mortality in never smokers, stratified by age (<65 years vs. ≥65 years), linear dose-response analysis

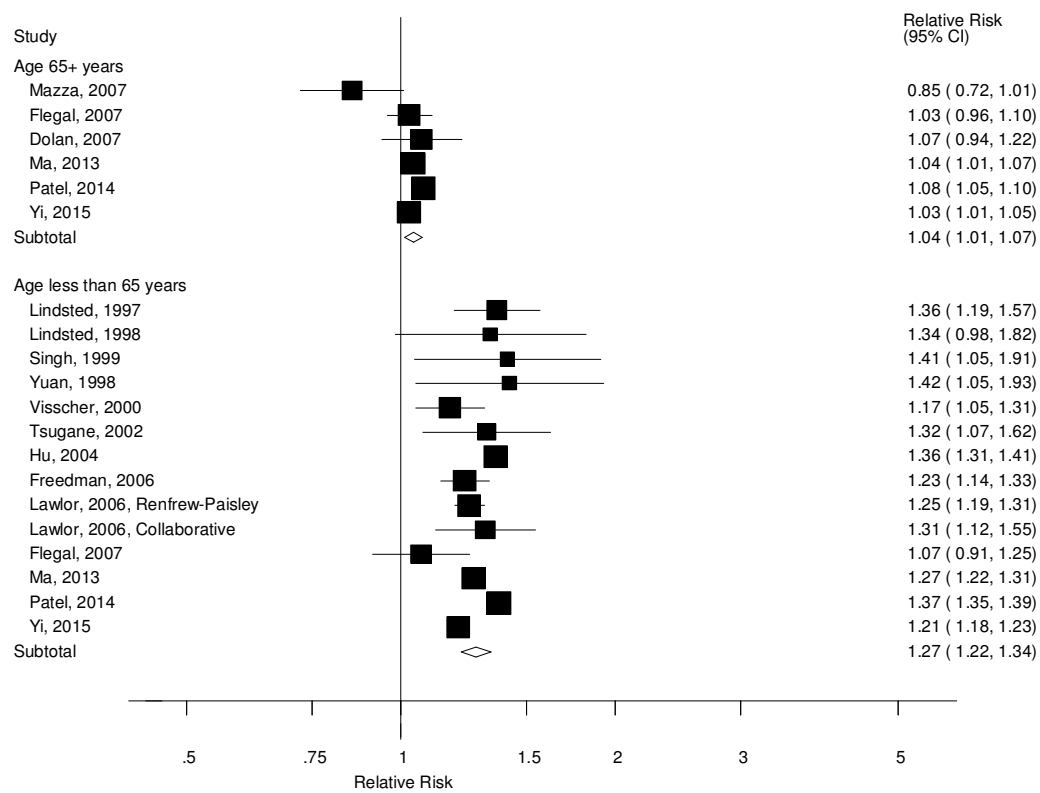

Fig P. BMI and all cause mortality in never smokers, age <65 years, nonlinear dose-response analysis

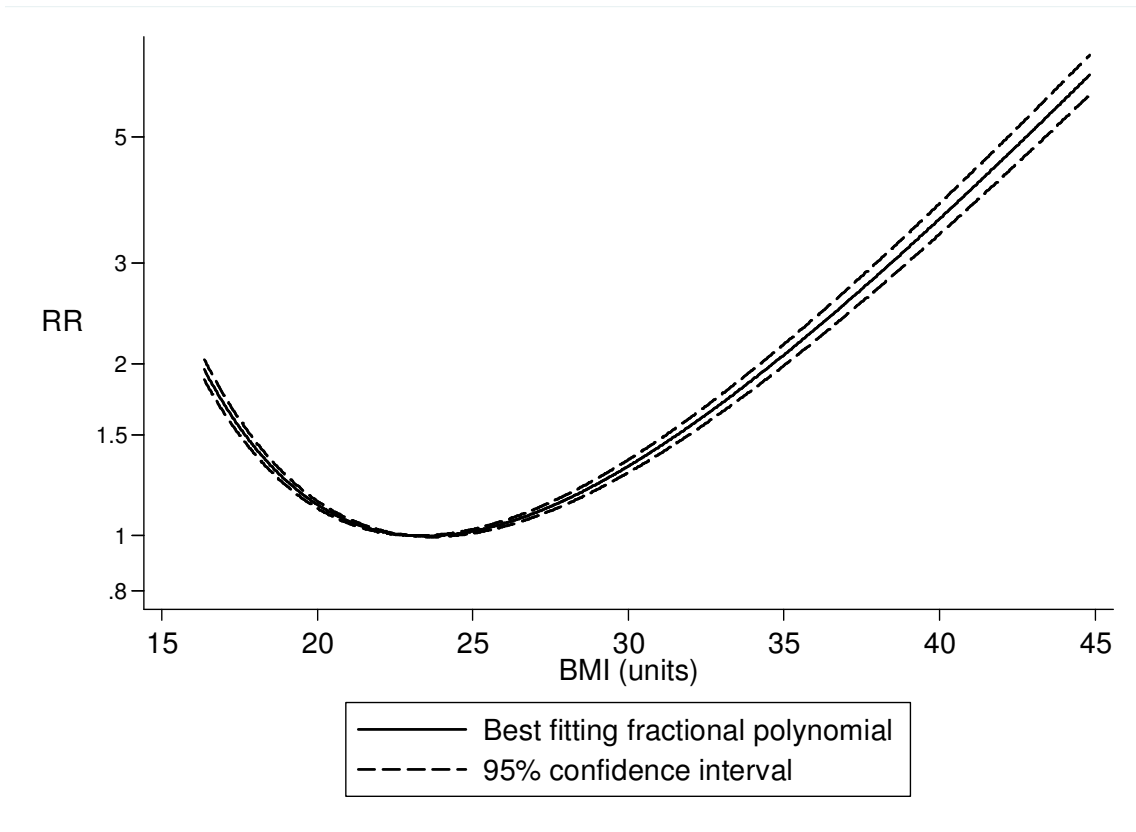

Fig Q. BMI and all cause mortality in never smokers, age  $\geq 65$  years, nonlinear dose-response analysis

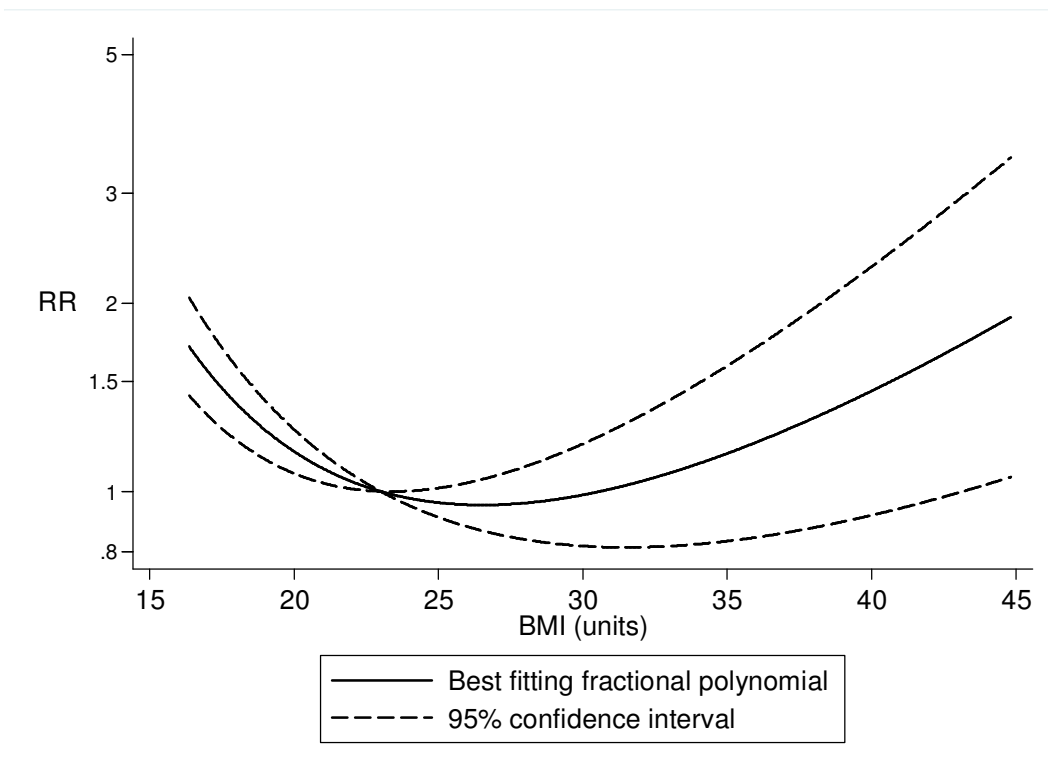

Supplement: aund030215.ww3_default.pdf [file aund030215.ww3_default.pdf]
