# Supplementary material for: BMI and all cause mortality: systematic review and non-linear dose-response meta-analysis of 230 cohort studies with 3.74 million deaths among 30.3 million participants
Source: PubMed Central journal article supplement — BMJ. 2016 May 5;353:i2156. doi: 10.1136/bmj.i2156 (PMC4856854; doi:10.1136/bmj.i2156), 2016-05-05
Supplement: aund030215.ww1_default.pdf [file aund030215.ww1_default.pdf]

Supplement to Aune D, Sen A, Prasad M, Norat T, Janszky I, Tonstad S, Romundstad P, Vatten LJ. BMI and all cause mortality: a systematic review and non-linear dose-response meta-analysis of 230 cohort studies with 3.74 million deaths among 30.3 million participants. *BMJ* 2016;353:i1256

## **Appendix 1:** Literature searches [posted as supplied by author]

### **PubMed search**

("body mass index" OR BMI OR overweight OR obesity OR anthropometry OR fatness OR "body fatness" OR "abdominal fatness" OR "abdominal obesity" OR "waist circumference" OR "waist-to-hip ratio" OR adiposity OR "weight gain" OR "weight change" OR "weight loss")

AND

("coronary heart disease" OR "heart disease" OR "ischemic heart disease" OR "ischaemic heart disease" OR "coronary artery disease" OR "myocardial infarction" OR "angina pectoris" OR "heart failure" OR stroke OR "ischemic stroke" OR "haemorrhagic stroke" OR "cerebrovascular disease" OR "cardiovascular disease" OR cancer OR "total cancer" OR neoplasm OR mortality OR "all-cause mortality" OR "total mortality" OR survival OR death)

AND

("case-control" OR cohort OR cohorts OR prospective OR longitudinal OR retrospective OR "follow-up" OR "cross-sectional" OR "hazard ratio" OR "hazard ratios" OR "relative risk" OR "relative risks" OR "incidence rate ratio" OR "incidence rate ratios" OR "odds ratios" OR "odds ratio" OR incidence)

NOT

(perinatal OR neonatal OR infant OR "case reports"[Publication Type] OR "comment"[Publication Type] OR "editorial"[Publication Type] OR "letter"[Publication Type] OR animal)

### **Embase search**

(body mass index/ OR BMI/ OR overweight/ OR obesity/ OR anthropometry/ OR fatness/ OR body fatness/ OR abdominal fatness/ OR abdominal obesity/ OR waist circumference/ OR waist-to-hip ratio/ OR adiposity/ OR weight gain/ OR weight change/ OR weight loss/)

AND

(coronary heart disease/ OR heart disease/ OR ischemic heart disease/ OR ischaemic heart disease/ OR coronary artery disease/ OR myocardial infarction/ OR angina pectoris/ OR heart failure/ OR stroke/ OR ischemic stroke/ OR haemorrhagic stroke/ OR cerebrovascular disease/ OR cardiovascular disease/ OR cancer/ OR total cancer/ OR neoplasm/ OR mortality/ OR all-cause mortality/ OR total mortality/ OR survival/ OR death/)

AND

(case-control OR cohort OR cohorts OR prospective OR longitudinal OR retrospective OR follow-up OR cross-sectional OR hazard ratio OR hazard ratios OR relative risk OR relative risks OR incidence rate ratio OR incidence rate ratios OR odds ratios OR odds ratio OR incidence)
