# Supplementary material for: BMI and all cause mortality: systematic review and non-linear dose-response meta-analysis of 230 cohort studies with 3.74 million deaths among 30.3 million participants
Source: PubMed Central journal article supplement — BMJ. 2016 May 5;353:i2156. doi: 10.1136/bmj.i2156 (PMC4856854; doi:10.1136/bmj.i2156), 2016-05-05
Supplement: aund030215.ww2_default.pdf [file aund030215.ww2_default.pdf]

Supplement to Aune D, Sen A, Prasad M, Norat T, Janszky I, Tonstad S, Romundstad P, Vatten LJ. BMI and all cause mortality: a systematic review and non-linear dose-response meta-analysis of 230 cohort studies with 3.74 million deaths among 30.3 million participants. *BMJ* 2016;353:i1256

**Appendix 2:** Supplementary tables [posted as supplied by author]

Table A. List of excluded studies and exclusion reason

| Exclusion reason                               | Reference |
|------------------------------------------------|-----------|
| Abstract                                       | 1-37      |
| BMI in childhood, adolescence, early adulthood | 38-53     |
| Comment                                        | 54,55     |
| Duplicate                                      | 56-204    |
| Ecological study                               | 205       |
| Interaction analysis                           | 206,207   |
| Less than 3 categories of BMI                  | 208-247   |
| Letter                                         | 248-253   |
| Meta-analysis                                  | 254-271   |
| Missing categories                             | 272,273   |
| News                                           | 274-276   |
| No confidence intervals                        | 277-282   |
| No cut-off points for BMI                      | 283,284   |
| No risk estimates                              | 285-343   |
| Not original data                              | 344-354   |
| Not relevant data                              | 355-369   |
| Not relevant outcome                           | 370,371   |
| Not retrieved                                  | 372       |
| Notes                                          | 373,374   |

|                                   |         |
|-----------------------------------|---------|
| Obese subjects, obesity diagnosis | 375-381 |
| Only continuous estimates         | 382-436 |
| Patients                          | 437-619 |
| Pooled analysis                   | 620-630 |
| Pregnant women                    | 631,632 |
| Review                            | 633-684 |
| Unadjusted risk estimates         | 685-687 |

### Reference List

- (1) Cacciatore F, Testa G, Mazzella F, Abete P. Waist circumference but not body-mass index predicts longterm mortality in elderly subjects with chronic heart failure. *European Geriatric Medicine Conference: 6th Congress of the EUGMS Dublin United Kingdom*. 2010;S50.
- (2) Ntaios G, Savvari P, Skalidi S et al. The effect of obesity on mortality after acute first-ever stroke: The obesity stroke paradox? *Cerebrovascular Diseases Conference: 19th European Stroke Conference Barcelona Spain*. 2010;22.
- (3) Trolle-Lagerros Y, Bellocco R, Jia C, Ye W. Effects of body mass index, waist to hip ratio, waist circumference and physical activity on total mortality risk in the Swedish National March Cohort. *Obesity Reviews Conference: 11th International Congress on Obesity, ICO 2010 Stockholm Sweden*. 2010;343-344.
- (4) Rosenblad A, Leppert J, Nilsson G. A novel anthropometric measure for predicting all-cause mortality. *Atherosclerosis Supplements Conference: 78th EAS Congress Hamburg Germany*. 2010;11:32.
- (5) Burton A, Martin R, Galobardes B, Davey SG, Jeffreys M. Adolescent body mass index and risk of cancer in adulthood: Historical cohort study. *American Journal of Epidemiology Conference: 43rd Annual Meeting of the Society for Epidemiologic Research, SER 2010 Anaheim, CA United States*. 2010;171:S63.
- (6) Whitlock G, Yang G, Offer A et al. Body mass index and mortality among 220,000 men in China: A nationally representative prospective study. *Obesity Reviews Conference: 11th International Congress on Obesity, ICO 2010 Stockholm Sweden*. 2010;11:54.
- (7) Parapid B, Milic N, Ostojic MC et al. Impact of body mass index on all-cause and cause-specific mortality - The 40 years' follow-up of the serbian cohorts of the seven countries' study. *European Heart Journal Conference: European Society of Cardiology, ESC Congress 2010 Stockholm Sweden*. 2010;31:1001.
- (8) Al Snih S, Markides KS, Ottenbacher KJ, Goodwin JS. BMI and WC as predictors of 14-year all-cause, cardiovascular, and cancer mortality among older Mexican Americans. *Clinical and Translational Science Conference: 2010 Clinical and Translational Research and Education Meeting: ACRT/SCTS Joint Annual Meeting Washington, DC United States*. 2010;3:S8.

- (9) Soderberg S, Cameron A, Magliano D et al. Mortality, all-cause and CVD, over 15 years in multi-ethnic Mauritius: The impact of diabetes and obesity. *Scandinavian Cardiovascular Journal Conference: European Society of Cardiology, ESC Congress 2010 Stockholm Sweden*. 2010;44:17-18.
- (10) Bombelli M, Toso E, Fodri D et al. Impact of body mass index and waist circumference on the risk of cardiovascular events and all-cause death in a general population. *High Blood Pressure and Cardiovascular Prevention Conference: National Congress of the Italian Society of Hypertension, SIIA 2010 Rome Italy*. 2010;17:139.
- (11) Bombelli M, Toso E, Casati A et al. Impact of body mass index and waist circumference on the risk of cardiovascular events and all-cause death in a general population. *Journal of Hypertension Conference: 20th European Meeting on Hypertension of the European Society of Hypertension, ESH Oslo Norway*. 2010;28:e134.
- (12) Walter S, Mackenbach J, Newson R, Hofman A, Tiemeier H. Obesity, incident disease, and mortality - The obesity paradox revisited. *American Journal of Epidemiology Conference: 3rd North American Congress of Epidemiology Montreal, QC Canada*. 2011;173:S235.
- (13) Chen Z, Nicholas JS, Arendell L et al. Do BMI, waist circumference and body composition predict mortality in multiethnic older women? *American Journal of Epidemiology Conference: 3rd North American Congress of Epidemiology Montreal, QC Canada*. 2011;173:S198.
- (14) Nilsson G, Rosenblad A, Leppert J. Waist-hip-ratio is a considerably better predictor of all-cause mortality than bmi for middle aged persons. *Journal of Diabetes Conference: 4th International Congress on Prediabetes and the Metabolic Syndrome Madrid Spain*. 2011;3:228-229.
- (15) Katzmarzyk PT, Reeder BA, Elliott S et al. Body mass index and mortality from cardiovascular disease and cancer among Canadian adults. *Obesity Conference: 29th Annual Scientific Meeting of the Obesity Society, Obesity 2011 Orlando, FL United States*. 2011;19:S227.
- (16) Park S-Y, Wilkens L, Murphy S, Monroe K, Henderson B, Kolonel L. Ethnic differences in the effects of body mass index on mortality: The multiethnic cohort study. *American Journal of Epidemiology Conference: 3rd North American Congress of Epidemiology Montreal, QC Canada*. 2011;173:S309.
- (17) Cohen S, Signorello L, Cope E, Blot W. Body mass index at age 21 in relation to all-cause mortality among black and white adults. *American Journal of Epidemiology Conference: 45th Annual Meeting of the Society for Epidemiologic Research, SER 2012 Minneapolis, MN United States*. 2012;175:S22.
- (18) Van Der AD, Nooyens A, Van DF, Boer J. Prevalence, characteristics and all-cause mortality risk of metabolically healthy obese individuals: The epic-morgen study. *Obesity Facts Conference: 19th European Congress on Obesity, ECO2012 Lyon France*. 2012;5:104-105.
- (19) Magliano D, Vilier A, Balkau B, Fagherazzi G, Chapelon F. Body shape and risk of all-cause mortality and cancer in french women from the E3N study. *Obesity Facts Conference: 19th European Congress on Obesity, ECO2012 Lyon France*. 2012;5:91.
- (20) Ekelund U, Ward H, Luan J et al. Physical activity, general and abdominal obesity and mortality in European men and women. *Circulation Conference: American Heart Association 2013 Scientific Sessions and Resuscitation Science Symposium Dallas, TX United States*. 2013;128:Abstract 12990.

- (21) Ashwell M, Mayhew L, Richardson J, Rickayzen B. Waist-to-height ratio is more accurate than body mass index to quantify reduced life expectancy. *Obesity Facts Conference: 20th European Congress on Obesity, ECO 2013 Liverpool United Kingdom*. 2013;6:185.
- (22) Shalnova SA, Deev AD, Kapustina AV, Balanova JA. Association of cause-specific mortality with body mass index in Russian population. *European Heart Journal Conference: European Society of Cardiology, ESC Congress 2013 Amsterdam Netherlands*. 2013;34:149.
- (23) Song X, Soderberg S, Jousilahti P et al. Comparison of abdominal obesity indicators and body mass index as a predictor of mortality among Europeans. *Diabetologia Conference: 49th Annual Meeting of the European Association for the Study of Diabetes, EASD 2013 Barcelona Spain*. 2013;56:S173.
- (24) Hinnouho G-M, Czernichow S, Dugravot A, Batty D, Kivimaki M, Singh-Manoux A. Metabolically healthy obesity and risk of mortality: Does the definition of metabolic health matter? *Obesity Facts Conference: 20th European Congress on Obesity, ECO 2013 Liverpool United Kingdom*. 2013;6:128.
- (25) Schmidt M, Sigrun AJ, Lemeshow S et al. Obesity in young adult men and risk of type ii diabetes, cardiovascular morbidity, or death before 55 years of age: A danish 33-year follow-up study. *Journal of the American College of Cardiology Conference: 62nd Annual Scientific Session of the American College of Cardiology and i2 Summit: Innovation in Intervention, ACC 13 San Francisco, CA United States*. 2013;61:E31.
- (26) Visscher T. Beyond the relationship between body weight and mortality. *Obesity Facts Conference: 21st European Congress on Obesity, ECO 2014 Sofia Bulgaria*. 2014;7:9.
- (27) Batsis JA, Sahakyan KR, Singh P, Somers VK, Bartels SJ, Lopez-Jimenez F. Association of plasma leptin, adiposity, and mortality in older adults: Data from the national health and nutrition examination survey III. *Journal of the American Geriatrics Society Conference: 2014 Annual Scientific Meeting of the American Geriatrics Society Orlando, FL United States*. 2014;62:S40.
- (28) Chen Z. Obesity, biomarkers and mortality in multiethnic cohort of older women in the US. *Annals of Anatomy Conference: 18th Congress of the International Federation of Associations of Anatomists, IFAA 2014 Beijing China*. 2014;196:150-151.
- (29) Klatsky AL, Zhang J. Body mass index and mortality in a very large cohort: Is it really healthier to be overweight? *Cardiology (Switzerland) Conference: International Academy of Cardiology 20th World Congress on Heart Disease Annual Scientific Sessions 2015 Vancouver, BC Canada*. 2015;131:328.
- (30) Kim KJ, Kim SH, An JH et al. Effects of body mass index on mortality risk in the general population and in subjects with chronic disease: The national sample cohort (2002-2010) in Korea. *Diabetes Conference: 75th Scientific Sessions of the American Diabetes Association Boston, MA United States*. 2015;64:A392.
- (31) Omerovic E, Angeros O, Lagerqvist B et al. Impact of body mass index on mortality in patients with acute myocardial infarction. *European Heart Journal Conference: European Society of Cardiology, ESC Congress 2009 Barcelona Spain*. 2009;30:91.
- (32) Rosenblad A, Leppert J, Nilsson G. The waist-hip-height-ratio (WHHR): An improvement of the waist-hip-ratio for predicting all-cause mortality. *Journal of Diabetes Conference: 4th International Congress on Prediabetes and the Metabolic Syndrome Madrid Spain*. 2011;3:231.
- (33) Lee J, Jeon JY, Meyerhardt JA et al. Association between body mass index and all-cause mortality in colorectal cancer patients: A meta-analysis of prospective cohort

- studies. *Journal of Clinical Oncology Conference: 2014 Annual Meeting of the American Society of Clinical Oncology, ASCO Chicago, IL United States.* 2014;32:3613.
- (34) Winter J, Wattanapenpaiboon N, Nowson C. Body weight and mortality in older adults: A meta-analysis. *Australasian Medical Journal Conference: 35th Annual Scientific Meeting Joint Annual Scientific Meeting of the Nutrition Society of New Zealand and the Nutrition Society of Australia Queenstown New Zealand.* 2011;4:709.
- (35) Mehta T, Fontaine KR, Keith SW et al. Has the relationship between obesity and mortality changed over calendar time? Evidence from a raw data meta-analysis of eighteen prospective cohorts in US. *Obesity Conference: 29th Annual Scientific Meeting of the Obesity Society, Obesity 2011 Orlando, FL United States.* 2011;19:S52.
- (36) Ladhani M, Craig JC, Irving M, Clayton P, Wong G. Obesity and the risk of all-cause and cardiovascular mortality across the spectrum of CKD: A systematic review and meta-analysis. *Nephrology Conference: 51st Annual Scientific Meeting of the Australian and New Zealand Society of Nephrology Canberra, ACT Australia Conference Start.* 2015;20:49.
- (37) Galindo RJ, Harris YT, Wallia A, Stein J, Vellanki P, Umpierrez GE. Body mass index, diabetes type, and mortality after cardiac transplantation. *Diabetes Conference: 75th Scientific Sessions of the American Diabetes Association Boston, MA United States.* 2015;64:A477.
- (38) Twig G, Afek A, Shamiss A et al. Adolescence BMI and Trends in adulthood Mortality: A Study of 2.16 Million Adolescents. *J Clin Endocrinol Metab.* 2014;jc20141213.
- (39) Sato M, Kodama S, Sugawara A, Totsuka K, Saito K, Sone H. No relationship between body mass index during adolescence and all-cause mortality in Japanese women--a 56.5-year observational study. *Ann Epidemiol.* 2009;19:590-591.
- (40) de Mutsert R, Sun Q, Willett WC, Hu FB, van Dam RM. Overweight in early adulthood, adult weight change, and risk of type 2 diabetes, cardiovascular diseases, and certain cancers in men: a cohort study. *Am J Epidemiol.* 2014;179:1353-1365.
- (41) Baer HJ, Glynn RJ, Hu FB et al. Risk factors for mortality in the nurses' health study: a competing risks analysis. *Am J Epidemiol.* 2011;173:319-329.
- (42) Mousavi SV, Mohebi R, Mozaffary A, Sheikholeslami F, Azizi F, Hadaegh F. Changes in body mass index, waist and hip circumferences, waist to hip ratio and risk of all-cause mortality in men. *European Journal of Clinical Nutrition.* 2015;69:927-932.
- (43) Gunnell DJ, Frankel SJ, Nanchahal K, Peters TJ, Davey SG. Childhood obesity and adult cardiovascular mortality: a 57-y follow-up study based on the Boyd Orr cohort. *Am J Clin Nutr.* 1998;67:1111-1118.
- (44) Must A. Morbidity and mortality associated with elevated body weight in children and adolescents. *Am J Clin Nutr.* 1996;63:445S-447S.
- (45) Must A, Strauss RS. Risks and consequences of childhood and adolescent obesity. *Int J Obes Relat Metab Disord.* 1999;23 Suppl 2:S2-11.
- (46) Franks PW, Hanson RL, Knowler WC, Sievers ML, Bennett PH, Looker HC. Childhood obesity, other cardiovascular risk factors, and premature death. *N Engl J Med.* 2010;362:485-493.
- (47) Maffeis C, Tato L. Long-term effects of childhood obesity on morbidity and mortality. *Horm Res.* 2001;55 Suppl 1:42-45.

- (48) Park MH, Falconer C, Viner RM, Kinra S. The impact of childhood obesity on morbidity and mortality in adulthood: a systematic review. *Obes Rev.* 2012;13:985-1000.
- (49) Must A, Jacques PF, Dallal GE, Bajema CJ, Dietz WH. Long-term morbidity and mortality of overweight adolescents - A follow-up of the Harvard Growth Study of 1922 to 1935. *New England Journal of Medicine.* 1992;327:1350-1355.
- (50) Engeland A, Bjorge T, Sogaard AJ, Tverdal A. Body mass index in adolescence in relation to total mortality: 32-year follow-up of 227,000 Norwegian boys and girls. *Am J Epidemiol.* 2003;157:517-523.
- (51) Engeland A, Bjorge T, Tverdal A, Sogaard AJ. Obesity in adolescence and adulthood and the risk of adult mortality. *Epidemiology.* 2004;15:79-85.
- (52) Bjorge T, Engeland A, Tverdal A, Smith GD. Body mass index in adolescence in relation to cause-specific mortality: a follow-up of 230,000 Norwegian adolescents. *Am J Epidemiol.* 2008;168:30-37.
- (53) Hirko KA, Kantor ED, Cohen SS, Blot WJ, Stampfer MJ, Signorello LB. Body Mass Index in Young Adulthood, Obesity Trajectory, and Premature Mortality. *Am J Epidemiol.* 2015;182:441-450.
- (54) Clark K. The effect of age on the association between body-mass index and mortality. *J Insur Med.* 1998;30:48-49.
- (55) Summaries for patients. Does obesity in women during adolescence increase the risk for premature death? *Ann Intern Med.* 2006;145:134.
- (56) Harris T, Cook EF, Garrison R, Higgins M, Kannel W, Goldman L. Body mass index and mortality among nonsmoking older persons. The Framingham Heart Study. *JAMA.* 1988;259:1520-1524.
- (57) Menotti A, Keys A, Aravanis C et al. Seven Countries Study. First 20-year mortality data in 12 cohorts of six countries. *Ann Med.* 1989;21:175-179.
- (58) Tayback M, Kumanyika S, Chee E. Body weight as a risk factor in the elderly. *Arch Intern Med.* 1990;150:1065-1072.
- (59) Rissanen A, Heliövaara M, Knekt P, Reunanen A, Aromaa A, Maatela J. Risk of disability and mortality due to overweight in a Finnish population. *BMJ.* 1990;301:835-837.
- (60) Lindsted K, Tonstad S, Kuzma JW. Body mass index and patterns of mortality among Seventh-day Adventist men. *Int J Obes.* 1991;15:397-406.
- (61) Allebeck P, Bergh C. Height, body mass index and mortality: do social factors explain the association? *Public Health.* 1992;106:375-382.
- (62) Folsom AR, Kaye SA, Sellers TA et al. Body fat distribution and 5-year risk of death in older women. *JAMA.* 1993;269:483-487.
- (63) Chang-Claude J, Frentzel-Beyme R. Dietary and lifestyle determinants of mortality among German vegetarians. *Int J Epidemiol.* 1993;22:228-236.
- (64) Rumpel C, Harris TB, Madans J. Modification of the relationship between the Quetelet index and mortality by weight-loss history among older women. *Ann Epidemiol.* 1993;3:343-350.
- (65) Davis MA, Neuhaus JM, Moritz DJ, Lein D, Barclay JD, Murphy SP. Health behaviors and survival among middle-aged and older men and women in the NHANES I Epidemiologic Follow-up Study. *Prev Med.* 1994;23:369-376.
- (66) Watt GC, Hart CL, Hole DJ, Smith GD, Gillis CR, Hawthorne VM. Risk factors for cardiorespiratory and all cause mortality in men and women in urban Scotland: 15 year follow up. *Scott Med J.* 1995;40:108-112.

- (67) Brenner H, Arndt V, Rothenbacher D, Schuberth S, Fraisse E, Fliedner TM. Body weight, pre-existing disease, and all-cause mortality in a cohort of male employees in the German construction industry. *J Clin Epidemiol.* 1997;50:1099-1106.
- (68) Scott WK, Macera CA, Cornman CB, Sharpe PA. Functional health status as a predictor of mortality in men and women over 65. *J Clin Epidemiol.* 1997;50:291-296.
- (69) Durazo-Arvizu R, Cooper RS, Luke A, Prewitt TE, Liao Y, McGee DL. Relative weight and mortality in U.S. blacks and whites: findings from representative national population samples. *Ann Epidemiol.* 1997;7:383-395.
- (70) Sharp DS, Burchfiel CM, Curb JD, Rodriguez BL, Enright PL. The synergy of low lung function and low body mass index predicting all-cause mortality among older Japanese-American men. *J Am Geriatr Soc.* 1997;45:1464-1471.
- (71) Durazo-Arvizu RA, McGee DL, Cooper RS, Liao Y, Luke A. Mortality and optimal body mass index in a sample of the US population. *Am J Epidemiol.* 1998;147:739-749.
- (72) Stevens J, Plankey MW, Williamson DF et al. The body mass index-mortality relationship in white and African American women. *Obes Res.* 1998;6:268-277.
- (73) Lee CD, Jackson AS, Blair SN. US weight guidelines: is it also important to consider cardiorespiratory fitness? *Int J Obes Relat Metab Disord.* 1998;22 Suppl 2:S2-S7.
- (74) Wannamethee SG, Shaper AG, Walker M, Ebrahim S. Lifestyle and 15-year survival free of heart attack, stroke, and diabetes in middle-aged British men. *Arch Intern Med.* 1998;158:2433-2440.
- (75) Stevens J, Cai J, Juhaeri, Thun MJ, Williamson DF, Wood JL. Consequences of the use of different measures of effect to determine the impact of age on the association between obesity and mortality. *Am J Epidemiol.* 1999;150:399-407.
- (76) Mikkelsen KL, Heitmann BL, Keiding N, Sorensen TI. Independent effects of stable and changing body weight on total mortality. *Epidemiology.* 1999;10:671-678.
- (77) Yarnell JW, Patterson CC, Thomas HF, Sweetnam PM. Comparison of weight in middle age, weight at 18 years, and weight change between, in predicting subsequent 14 year mortality and coronary events: Caerphilly Prospective Study. *J Epidemiol Community Health.* 2000;54:344-348.
- (78) Rantanen T, Harris T, Leveille SG et al. Muscle strength and body mass index as long-term predictors of mortality in initially healthy men. *J Gerontol A Biol Sci Med Sci.* 2000;55:M168-M173.
- (79) Song YM, Sung J. Body mass index and mortality: a twelve-year prospective study in Korea. *Epidemiology.* 2001;12:173-179.
- (80) Lahmann PH, Lissner L, Gullberg B, Berglund G. A prospective study of adiposity and all-cause mortality: the Malmo Diet and Cancer Study. *Obes Res.* 2002;10:361-369.
- (81) Crotty M, Miller M, Giles L et al. Australian Longitudinal Study of Ageing: prospective evaluation of anthropometric indices in terms of four year mortality in community-living older adults. *J Nutr Health Aging.* 2002;6:20-23.
- (82) Crespo CJ, Palmieri MR, Perdomo RP et al. The relationship of physical activity and body weight with all-cause mortality: results from the Puerto Rico Heart Health Program. *Ann Epidemiol.* 2002;12:543-552.
- (83) Bigaard J, Tjonneland A, Thomsen BL, Overvad K, Heitmann BL, Sorensen TI. Waist circumference, BMI, smoking, and mortality in middle-aged men and women. *Obes Res.* 2003;11:895-903.
- (84) Thorpe RJ, Jr., Ferraro KF. Aging, Obesity, and Mortality: Misplaced Concern About Obese Older People? *Res Aging.* 2004;26:108-129.

- (85) Ajani UA, Lotufo PA, Gaziano JM et al. Body mass index and mortality among US male physicians. *Ann Epidemiol.* 2004;14:731-739.
- (86) Oh SW, Shin SA, Yun YH, Yoo T, Huh BY. Cut-off point of BMI and obesity-related comorbidities and mortality in middle-aged Koreans. *Obes Res.* 2004;12:2031-2040.
- (87) Krueger PM, Rogers RG, Hummer RA, Boardman JD. Body Mass, Smoking, and Overall and Cause-Specific Mortality among Older U.S. Adults. *Research on Aging.* 2004;26:82-107.
- (88) Keller HH, Ostbye T. Body Mass Index (BMI), BMI change and mortality in community-dwelling seniors without dementia. *J Nutr Health Aging.* 2005;9:316-320.
- (89) Flegal KM, Graubard BI, Williamson DF, Gail MH. Excess deaths associated with underweight, overweight, and obesity. *JAMA.* 2005;293:1861-1867.
- (90) He J, Gu D, Wu X et al. Major causes of death among men and women in China. *N Engl J Med.* 2005;353:1124-1134.
- (91) Janssen I, Katzmarzyk PT, Church TS, Blair SN. The Cooper Clinic Mortality Risk Index: clinical score sheet for men. *Am J Prev Med.* 2005;29:194-203.
- (92) Murphy NF, MacIntyre K, Stewart S, Hart CL, Hole D, McMurray JJ. Long-term cardiovascular consequences of obesity: 20-year follow-up of more than 15 000 middle-aged men and women (the Renfrew-Paisley study). *Eur Heart J.* 2006;27:96-106.
- (93) Takata Y, Ansai T, Soh I et al. Association between body mass index and mortality in an 80-year-old population. *J Am Geriatr Soc.* 2007;55:913-917.
- (94) Arndt V, Rothenbacher D, Zschenderlein B, Schuberth S, Brenner H. Body mass index and premature mortality in physically heavily working men--a ten-year follow-up of 20,000 construction workers. *J Occup Environ Med.* 2007;49:913-921.
- (95) Song YM, Ha M, Sung J. Body mass index and mortality in middle-aged Korean women. *Ann Epidemiol.* 2007;17:556-563.
- (96) Wannamethee SG, Shaper AG, Lennon L, Whincup PH. Decreased muscle mass and increased central adiposity are independently related to mortality in older men. *Am J Clin Nutr.* 2007;86:1339-1346.
- (97) Batty GD, Kivimaki M, Smith GD, Marmot MG, Shipley MJ. Obesity and overweight in relation to mortality in men with and without type 2 diabetes/impaired glucose tolerance: the original Whitehall Study. *Diabetes Care.* 2007;30:2388-2391.
- (98) van Dam RM, Li T, Spiegelman D, Franco OH, Hu FB. Combined impact of lifestyle factors on mortality: prospective cohort study in US women. *BMJ.* 2008;337:a1440.
- (99) Reuser M, Bonneux L, Willekens F. The burden of mortality of obesity at middle and old age is small. A life table analysis of the US Health and Retirement Survey. *Eur J Epidemiol.* 2008;23:601-607.
- (100) Wen CP, vid Cheng TY, Tsai SP et al. Are Asians at greater mortality risks for being overweight than Caucasians? Redefining obesity for Asians. *Public Health Nutr.* 2009;12:497-506.
- (101) Reis JP, Macera CA, Araneta MR, Lindsay SP, Marshall SJ, Wingard DL. Comparison of overall obesity and body fat distribution in predicting risk of mortality. *Obesity (Silver Spring).* 2009;17:1232-1239.
- (102) McAuley P, Pittsley J, Myers J, Abella J, Froelicher VF. Fitness and fatness as mortality predictors in healthy older men: the veterans exercise testing study. *J Gerontol A Biol Sci Med Sci.* 2009;64:695-699.
- (103) Tamakoshi A, Tamakoshi K, Lin Y, Yagyu K, Kikuchi S. Healthy lifestyle and preventable death: findings from the Japan Collaborative Cohort (JACC) Study. *Prev Med.* 2009;48:486-492.



- (104) Suadicani P, Hein HO, von Eyben FE, Gyntelberg F. Metabolic and lifestyle predictors of ischemic heart disease and all-cause mortality among normal weight, overweight, and obese men: a 16-year follow-up in the Copenhagen Male Study. *Metab Syndr Relat Disord*. 2009;7:97-104.
- (105) Mehta NK, Chang VW. Mortality attributable to obesity among middle-aged adults in the United States. *Demography*. 2009;46:851-872.
- (106) Heitmann BL, Hills AP, Frederiksen P, Ward LC. Obesity, leanness, and mortality: effect modification by physical activity in men and women. *Obesity (Silver Spring)*. 2009;17:136-142.
- (107) Reis JP, Araneta MR, Wingard DL, Macera CA, Lindsay SP, Marshall SJ. Overall obesity and abdominal adiposity as predictors of mortality in u.s. White and black adults. *Ann Epidemiol*. 2009;19:134-142.
- (108) Hwang L-C, Chen S-C, Tjung J-J, Chiou H-Y, Chen C-J, Tsai C-H. Body mass index as a predictor of mortality in older people in Taiwan. *International Journal of Gerontology*. 2009;3:39-46.
- (109) Shimazu T, Kuriyama S, Ohmori-Matsuda K, Kikuchi N, Nakaya N, Tsuji I. Increase in body mass index category since age 20 years and all-cause mortality: A prospective cohort study (the Ohsaki Study). *International Journal of Obesity*. 2009;33:490-496.
- (110) Han SS, Kim KW, Kim KI et al. Lean mass index: a better predictor of mortality than body mass index in elderly Asians. *J Am Geriatr Soc*. 2010;58:312-317.
- (111) Monteverde M, Noronha K, Palloni A, Novak B. Obesity and excess mortality among the elderly in the United States and Mexico. *Demography*. 2010;47:79-96.
- (112) Flegal KM, Graubard BI, Williamson DF, Gail MH. Sources of differences in estimates of obesity-associated deaths from first National Health and Nutrition Examination Survey (NHANES I) hazard ratios. *Am J Clin Nutr*. 2010;91:519-527.
- (113) Petursson H, Sigurdsson JA, Bengtsson C, Nilsen TI, Getz L. Body configuration as a predictor of mortality: comparison of five anthropometric measures in a 12 year follow-up of the Norwegian HUNT 2 study. *PLoS One*. 2011;6:e26621.
- (114) Ma J, Flanders WD, Ward EM, Jemal A. Body mass index in young adulthood and premature death: analyses of the US National Health Interview Survey linked mortality files. *Am J Epidemiol*. 2011;174:934-944.
- (115) Singh PN, Haddad E, Tonstad S, Fraser GE. Does excess body fat maintained after the seventh decade decrease life expectancy? *J Am Geriatr Soc*. 2011;59:1003-1011.
- (116) Faeh D, Braun J, Tarnutzer S, Bopp M. Obesity but not overweight is associated with increased mortality risk. *Eur J Epidemiol*. 2011;26:647-655.
- (117) Saydah S, Bullard K, Imperatore G, Geiss L, Gregg E. Cardiometabolic risk factors and early all-cause mortality among young U.S. individuals. *Diabetes Conference: 71st Scientific Sessions of the American Diabetes Association San Diego, CA United States*. 2011;60:A366.
- (118) Krakauer NY, Krakauer JC. A new body shape index predicts mortality hazard independently of body mass index. *PLoS One*. 2012;7:e39504.
- (119) Kahn HS, Bullard KM, Barker LE, Imperatore G. Differences between adiposity indicators for predicting all-cause mortality in a representative sample of United States non-elderly adults. *PLoS One*. 2012;7:e50428.
- (120) Zheng H, Yang Y. Population heterogeneity in the impact of body weight on mortality. *Soc Sci Med*. 2012;75:990-996.
- (121) Tsai AC, Hsiao ML. The association of body mass index (BMI) with all-cause mortality in older Taiwanese: results of a national cohort study. *Arch Gerontol Geriatr*. 2012;55:217-220.

- (122) Durward CM, Hartman TJ, Nickols-Richardson SM. All-cause mortality risk of metabolically healthy obese individuals in NHANES III. *Journal of Obesity*. 2012;2012:2012.
- (123) Hjellvik V, Selmer R, Gjessing HK, Tverdal A, Vollset SE. Body mass index, smoking, and risk of death between 40 and 70 years of age in a Norwegian cohort of 32,727 women and 33,475 men. *Eur J Epidemiol*. 2013;28:35-43.
- (124) Saydah S, Bullard KM, Imperatore G, Geiss L, Gregg EW. Cardiometabolic risk factors among US adolescents and young adults and risk of early mortality. *Pediatrics*. 2013;131:e679-e686.
- (125) Greenberg JA. Obesity and early mortality in the United States. *Obesity (Silver Spring)*. 2013;21:405-412.
- (126) Zheng H, Tumin D, Qian Z. Obesity and mortality risk: new findings from body mass index trajectories. *Am J Epidemiol*. 2013;178:1591-1599.
- (127) Sui X, Li H, Zhang J, Chen L, Zhu L, Blair SN. Percentage of deaths attributable to poor cardiovascular health lifestyle factors: Findings from the Aerobics Center Longitudinal Study. *Epidemiol Res Int*. 2013;Article Number: 437465.
- (128) Batsis JA, Sahakyan KR, Rodriguez-Escudero JP, Bartels SJ, Somers VK, Lopez-Jimenez F. Normal weight obesity and mortality in United States subjects >60 years of age (from the third national health and nutrition examination survey). *American Journal of Cardiology*. 2013;112:1592-1598.
- (129) Navaneethan SD, Kirwan JP, Arrigain S, Schold JD. Adiposity measures, lean body mass, physical activity and mortality: NHANES 1999-2004. *BMC Nephrol*. 2014;15:108.
- (130) Batsis JA, Singh S, Lopez-Jimenez F. Anthropometric measurements and survival in older americans: results from the third national health and nutrition examination survey. *J Nutr Health Aging*. 2014;18:123-130.
- (131) Borrell LN, Samuel L. Body Mass Index Categories and Mortality Risk in US Adults: The Effect of Overweight and Obesity on Advancing Death. *Am J Public Health*. 2014;104:512-519.
- (132) Lajous M, Bijon A, Fagherazzi G et al. Body mass index, diabetes, and mortality in French women: explaining away a "paradox". *Epidemiology*. 2014;25:10-14.
- (133) Rillamas-Sun E, Lacroix AZ, Waring ME et al. Obesity and late-age survival without major disease or disability in older women. *JAMA Intern Med*. 2014;174:98-106.
- (134) Preston SH, Stokes A. Obesity Paradox: Conditioning on Disease Enhances Biases in Estimating the Mortality Risks of Obesity. *Epidemiology*. 2014;25:454-461.
- (135) Banack HR, Kaufman JS. The obesity paradox: Understanding the effect of obesity on mortality among individuals with cardiovascular disease. *Prev Med*. 2014;62C:96-102.
- (136) Holme I, Tonstad S. Increased predictive ability of BMI but not other risk factors with time in men: 39-year follow-up of total mortality in the Oslo Study. *Obes Facts*. 2014;7:311-321.
- (137) Stokes A. Using maximum weight to redefine body mass index categories in studies of the mortality risks of obesity. *Population Health Metrics*. 2014;12:6.
- (138) Li K, Husing A, Kaaks R. Lifestyle risk factors and residual life expectancy at age 40: a German cohort study. *BMC medicine*. 2014;12:59.
- (139) Bea JW, Thomson CA, Wertheim BC et al. Risk of Mortality According to Body Mass Index and Body Composition Among Postmenopausal Women. *Am J Epidemiol*. 2015;182:585-596.
- (140) Holme I, Tonstad S. Survival in elderly men in relation to midlife and current BMI. *Age Ageing*. 2015;44:434-439.

- (141) Kabat GC, Matthews CE, Kamensky V, Hollenbeck AR, Rohan TE. Adherence to cancer prevention guidelines and cancer incidence, cancer mortality, and total mortality: a prospective cohort study. *Am J Clin Nutr.* 2015;101:558-569.
- (142) Wierup I, Carlsson AC, Wandell P, Riserus U, Arnlov J, Borne Y. Low anthropometric measures and mortality--results from the Malmo Diet and Cancer Study. *Ann Med.* 2015;47:325-331.
- (143) Preston SH, Fishman E, Stokes A. Effects of categorization and self-report bias on estimates of the association between obesity and mortality. *Ann Epidemiol.* 2015;doi: 10.1016/j.annepidem.2015.07.012. [Epub ahead of print].
- (144) Palloni A, Beltran-Sanchez H, Novak B, Pinto G, Wong R. Adult obesity, disease and longevity in Mexico. *Salud Publica Mex.* 2015;57 Suppl 1:S22-S30.
- (145) Janssen I, Bacon E. Effect of current and midlife obesity status on mortality risk in the elderly. *Obesity (Silver Spring).* 2008;16:2504-2509.
- (146) Bigaard J, Frederiksen K, Tjonneland A et al. Body fat and fat-free mass and all-cause mortality. *Obes Res.* 2004;12:1042-1049.
- (147) Gray L, Hart CL, Smith GD, Batty GD. What is the predictive value of established risk factors for total and cardiovascular disease mortality when measured before middle age? Pooled analyses of two prospective cohort studies from Scotland. *Eur J Cardiovasc Prev Rehabil.* 2010;17:106-112.
- (148) Kalmijn S, Curb JD, Rodriguez BL, Yano K, Abbott RD. The association of body weight and anthropometry with mortality in elderly men: the Honolulu Heart Program. *Int J Obes Relat Metab Disord.* 1999;23:395-402.
- (149) Tamakoshi A, Yatsuya H, Lin Y et al. BMI and all-cause mortality among Japanese older adults: findings from the Japan collaborative cohort study. *Obesity (Silver Spring).* 2010;18:362-369.
- (150) Singh-Manoux A, Sabia S, Bouillon K et al. Association of body mass index and waist circumference with successful aging. *Obesity (Silver Spring).* 2014;22:1172-1178.
- (151) Peeters A, Barendregt JJ, Willekens F, Mackenbach JP, Al MA, Bonneux L. Obesity in adulthood and its consequences for life expectancy: a life-table analysis. *Ann Intern Med.* 2003;138:24-32.
- (152) He J, McGee D, Niu X, Choi W. Examining the dynamic association of BMI and mortality in the Framingham Heart Study. *Int J Environ Res Public Health.* 2009;6:3115-3126.
- (153) Nechuta SJ, Shu XO, Li HL et al. Combined impact of lifestyle-related factors on total and cause-specific mortality among Chinese women: prospective cohort study. *PLoS Med.* 2010;7.
- (154) Kvamme JM, Holmen J, Wilsgaard T, Florholmen J, Midthjell K, Jacobsen BK. Body mass index and mortality in elderly men and women: the Tromso and HUNT studies. *J Epidemiol Community Health.* 2012;66:611-617.
- (155) Williamson DF, Pamuk E, Thun M, Flanders D, Byers T, Heath C. Prospective study of intentional weight loss and mortality in never-smoking overweight US white women aged 40-64 years. *Am J Epidemiol.* 1995;141:1128-1141.
- (156) Williamson DF, Pamuk E, Thun M, Flanders D, Byers T, Heath C. Prospective study of intentional weight loss and mortality in overweight white men aged 40-64 years. *Am J Epidemiol.* 1999;149:491-503.
- (157) Taylor DH, Jr., Ostbye T. The effect of middle- and old-age body mass index on short-term mortality in older people. *J Am Geriatr Soc.* 2001;49:1319-1326.
- (158) Diaz VA, Mainous AG, III, Everett CJ. The association between weight fluctuation and mortality: results from a population-based cohort study. *J Community Health.* 2005;30:153-165.

- (159) Schonberg MA, Davis RB, McCarthy EP, Marcantonio ER. Index to predict 5-year mortality of community-dwelling adults aged 65 and older using data from the National Health Interview Survey. *J Gen Intern Med.* 2009;24:1115-1122.
- (160) Farrell SW, FitzGerald SJ, McAuley PA, Barlow CE. Cardiorespiratory fitness, adiposity, and all-cause mortality in women. *Med Sci Sports Exerc.* 2010;42:2006-2012.
- (161) Zajacova A, Burgard SA. Shape of the BMI-mortality association by cause of death, using generalized additive models: NHIS 1986-2006. *J Aging Health.* 2012;24:191-211.
- (162) Regidor E, Franch J, Segui M, Serrano R, Rodriguez-Artalejo F, Artola S. Traditional risk factors alone could not explain the excess mortality in patients with diabetes: a national cohort study of older Spanish adults. *Diabetes Care.* 2012;35:2503-2509.
- (163) Yang Q, Cogswell ME, Flanders WD et al. Trends in cardiovascular health metrics and associations with all-cause and CVD mortality among US adults. *JAMA.* 2012;307:1273-1283.
- (164) Fortes C, Mastroeni S, Sperati A et al. Walking four times weekly for at least 15min is associated with longevity in a Cohort of very elderly people. *Maturitas.* 2012;74:246-251.
- (165) Stevens J, Truesdale KP, Wang CH, Cai J, Erber E. Body mass index at age 25 and all-cause mortality in whites and African Americans: the Atherosclerosis Risk in Communities study. *J Adolesc Health.* 2012;50:221-227.
- (166) Manson JE, Willett WC, Stampfer MJ et al. Body weight and mortality among women. *N Engl J Med.* 1995;333:677-685.
- (167) Losonczy KG, Harris TB, Cornoni-Huntley J et al. Does weight loss from middle age to old age explain the inverse weight mortality relation in old age? *Am J Epidemiol.* 1995;141:312-321.
- (168) Shaper AG, Wannamethee SG, Walker M. Body weight: implications for the prevention of coronary heart disease, stroke, and diabetes mellitus in a cohort study of middle aged men. *BMJ.* 1997;314:1311-1317.
- (169) Calle EE, Thun MJ, Petrelli JM, Rodriguez C, Heath CW, Jr. Body-mass index and mortality in a prospective cohort of U.S. adults. *N Engl J Med.* 1999;341:1097-1105.
- (170) Ohta A, Aoki S, Takeuchi K, Yosiaki S, Suzuki S. Lifestyle and sociodemographic risk factors for death among middle-aged and elderly residents in Japan from a five-year follow-up cohort study. *J Epidemiol.* 2001;11:51-60.
- (171) Meyer HE, Sogaard AJ, Tverdal A, Selmer RM. Body mass index and mortality: the influence of physical activity and smoking. *Med Sci Sports Exerc.* 2002;34:1065-1070.
- (172) Jonsson S, Hedblad B, Engstrom G, Nilsson P, Berglund G, Janzon L. Influence of obesity on cardiovascular risk. Twenty-three-year follow-up of 22,025 men from an urban Swedish population. *Int J Obes Relat Metab Disord.* 2002;26:1046-1053.
- (173) Livingston EH, Ko CY. Effect of diabetes and hypertension on obesity-related mortality. *Surgery.* 2005;137:16-25.
- (174) Katzmarzyk PT, Church TS, Janssen I, Ross R, Blair SN. Metabolic syndrome, obesity, and mortality: impact of cardiorespiratory fitness. *Diabetes Care.* 2005;28:391-397.
- (175) Kuriyama S. Impact of overweight and obesity on medical care costs, all-cause mortality, and the risk of cancer in Japan. *J Epidemiol.* 2006;16:139-144.
- (176) Batty GD, Shipley MJ, Jarrett RJ, Breeze E, Marmot MG, Davey SG. Obesity and overweight in relation to disease-specific mortality in men with and without existing

- coronary heart disease in London: the original Whitehall study. *Heart*. 2006;92:886-892.
- (177) Sui X, Lamonte MJ, Laditka JN et al. Cardiorespiratory fitness and adiposity as mortality predictors in older adults. *JAMA*. 2007;298:2507-2516.
- (178) Koster A, Leitzmann MF, Schatzkin A et al. The combined relations of adiposity and smoking on mortality. *Am J Clin Nutr*. 2008;88:1206-1212.
- (179) Koster A, Harris TB, Moore SC et al. Joint associations of adiposity and physical activity with mortality: the National Institutes of Health-AARP Diet and Health Study. *Am J Epidemiol*. 2009;169:1344-1351.
- (180) Flicker L, McCaul KA, Hankey GJ et al. Body mass index and survival in men and women aged 70 to 75. *J Am Geriatr Soc*. 2010;58:234-241.
- (181) Yun KE, Park HS, Song YM, Cho SI. Increases in body mass index over a 7-year period and risk of cause-specific mortality in Korean men. *Int J Epidemiol*. 2010;39:520-528.
- (182) Bigaard J, Christensen J, Tjonneland A, Thomsen BL, Overvad K, Sorensen TI. Influence of lifestyle aspects on the association of body size and shape with all-cause mortality in middle-aged men and women. *Obes Facts*. 2010;3:252-260.
- (183) Dutta A, Henley W, Lang I et al. Predictors of extraordinary survival in the Iowa established populations for epidemiologic study of the elderly: cohort follow-up to "extinction". *J Am Geriatr Soc*. 2011;59:963-971.
- (184) Leitzmann MF, Moore SC, Koster A et al. Waist circumference as compared with body-mass index in predicting mortality from specific causes. *PLoS One*. 2011;6:e18582.
- (185) Artero EG, Espana-Romero V, Lee DC et al. Ideal cardiovascular health and mortality: Aerobics Center Longitudinal Study. *Mayo Clin Proc*. 2012;87:944-952.
- (186) Moliner-Urdiales D, Artero EG, Lee DC, Espana-Romero V, Sui X, Blair SN. Body adiposity index and all-cause and cardiovascular disease mortality in men. *Obesity (Silver Spring)*. 2013;21:1870-1876.
- (187) Thorpe RJ, Jr., Wilson-Frederick SM, Bowie JV et al. Health behaviors and all-cause mortality in African American men. *Am J Mens Health*. 2013;7:8S-18S.
- (188) Jackson CL, Yeh HC, Szklo M et al. Body-Mass Index and All-Cause Mortality in US Adults With and Without Diabetes. *J Gen Intern Med*. 2014;29:25-33.
- (189) Myint PK, Kwok CS, Luben RN, Wareham NJ, Khaw KT. Body fat percentage, body mass index and waist-to-hip ratio as predictors of mortality and cardiovascular disease. *Heart*. 2014;100:1613-1619.
- (190) Adams KF, Leitzmann MF, Ballard-Barbash R et al. Body mass and weight change in adults in relation to mortality risk. *Am J Epidemiol*. 2014;179:135-144.
- (191) Klenk J, Rapp K, Ulmer H, Concin H, Nagel G. Changes of body mass index in relation to mortality: results of a cohort of 42,099 adults. *PLoS One*. 2014;9:e84817.
- (192) Farrell SW, Finley CE, Jackson AW, Vega GL, Morrow JR, Jr. Association of multiple adiposity exposures and cardiorespiratory fitness with all-cause mortality in men: the Cooper Center Longitudinal Study. *Mayo Clin Proc*. 2014;89:772-780.
- (193) He J. Modeling the dynamic association of BMI and mortality in the Framingham Heart Study. *Ann Epidemiol*. 2011;21:517-525.
- (194) Mason C, Katzmarzyk PT, Blair SN. Eligibility for obesity treatment and risk of mortality in men. *Obes Res*. 2005;13:1803-1809.
- (195) Su D. Body mass index and old-age survival: a comparative study between the Union Army Records and the NHANES-I Epidemiological Follow-Up Sample. *Am J Hum Biol*. 2005;17:341-354.

- (196) Wong ES, Wang BC, Garrison LP et al. Examining the BMI-mortality relationship using fractional polynomials. *BMC Med Res Methodol*. 2011;11:175.
- (197) Yu Y. Reexamining the declining effect of age on mortality differentials associated with excess body mass: evidence of cohort distortions in the United States. *Am J Public Health*. 2012;102:915-922.
- (198) Tuomilehto J, Salonen JT, Marti B et al. Body weight and risk of myocardial infarction and death in the adult population of eastern Finland. *Br Med J (Clin Res Ed)*. 1987;295:623-627.
- (199) Mason C, Craig CL, Katzmarzyk PT. Influence of central and extremity circumferences on all-cause mortality in men and women. *Obesity (Silver Spring)*. 2008;16:2690-2695.
- (200) Staiano AE, Reeder BA, Elliott S et al. Body mass index versus waist circumference as predictors of mortality in Canadian adults. *Int J Obes (Lond)*. 2012;36:1450-1454.
- (201) Preston SH, Mehta NK, Stokes A. Modeling obesity histories in cohort analyses of health and mortality. *Epidemiology*. 2013;24:158-166.
- (202) Mehta T, McCubrey R, Pajewski NM et al. Does obesity associate with mortality among Hispanic persons? Results from the National Health Interview Survey. *Obesity (Silver Spring)*. 2013;21:1474-1477.
- (203) Atkins JL, Whincup PH, Morris RW, Lennon LT, Papacosta O, Wannamethee SG. Sarcopenic obesity and risk of cardiovascular disease and mortality: a population-based cohort study of older men. *J Am Geriatr Soc*. 2014;62:253-260.
- (204) Visscher TL, Rissanen A, Seidell JC et al. Obesity and unhealthy life-years in adult Finns: an empirical approach. *Arch Intern Med*. 2004;164:1413-1420.
- (205) Peter I, Otremski I, Livshits G. Geographic variation in vascular mortality in Eurasia: spatial autocorrelation analysis of mortality variables and risk factors. *Ann Hum Biol*. 1996;23:471-490.
- (206) Sharp DS, Masaki K, Burchfiel CM, Yano K, Schatz IJ. Prolonged QTc interval, impaired pulmonary function, and a very lean body mass jointly predict all-cause mortality in elderly men. *Ann Epidemiol*. 1998;8:99-106.
- (207) Lisko I, Tiainen K, Stenholm S et al. Inflammation, adiposity, and mortality in the oldest old. *Rejuvenation Res*. 2012;15:445-452.
- (208) Wingard DL, Suarez L, Barrett-Connor E. The sex differential in mortality from all causes and ischemic heart disease. *Am J Epidemiol*. 1983;117:165-172.
- (209) Sidney S, Friedman GD, Siegel AB. Thinness and mortality. *Am J Public Health*. 1987;77:317-322.
- (210) Wienpahl J, Ragland DR, Sidney S. Body mass index and 15-year mortality in a cohort of black men and women. *J Clin Epidemiol*. 1990;43:949-960.
- (211) Otten MW, Jr., Teutsch SM, Williamson DF, Marks JS. The effect of known risk factors on the excess mortality of black adults in the United States. *JAMA*. 1990;263:845-850.
- (212) Stevens J, Keil JE, Rust PF, Tyroler HA, Davis CE, Gazes PC. Body mass index and body girths as predictors of mortality in black and white women. *Arch Intern Med*. 1992;152:1257-1262.
- (213) Stevens J, Keil JE, Rust PF et al. Body mass index and body girths as predictors of mortality in black and white men. *Am J Epidemiol*. 1992;135:1137-1146.
- (214) Bengtsson C, Bjorkelund C, Lapidus L, Lissner L. Associations of serum lipid concentrations and obesity with mortality in women: 20 year follow up of participants in prospective population study in Gothenburg, Sweden. *BMJ*. 1993;307:1385-1388.

- (215) Balkau B, Eschwege E, Papoz L et al. Risk factors for early death in non-insulin dependent diabetes and men with known glucose tolerance status. *BMJ*. 1993;307:295-299.
- (216) Rosolova H, Simon J, Sefrna F. Impact of cardiovascular risk factors on morbidity and mortality in Czech middle-aged men: Pilsen Longitudinal Study. *Cardiology*. 1994;85:61-68.
- (217) Oldridge NB, Stump TE, Nothwehr FK, Clark DO. Prevalence and outcomes of comorbid metabolic and cardiovascular conditions in middle- and older-age adults. *J Clin Epidemiol*. 2001;54:928-934.
- (218) Luchsinger JA, Lee WN, Carrasquillo O, Rabinowitz D, Shea S. Body mass index and hospitalization in the elderly. *J Am Geriatr Soc*. 2003;51:1615-1620.
- (219) Panagiotakos DB, Chrysohoou C, Pitsavos C et al. Forty-years (1961-2001) of all-cause and coronary heart disease mortality and its determinants: the Corfu cohort from the Seven Countries Study. *Int J Cardiol*. 2003;90:73-79.
- (220) Ford ES. The metabolic syndrome and mortality from cardiovascular disease and all-causes: findings from the National Health and Nutrition Examination Survey II Mortality Study. *Atherosclerosis*. 2004;173:309-314.
- (221) Otiniano ME, Du XL, Maldonado MR, Ray L, Markides K. Effect of metabolic syndrome on heart attack and mortality in Mexican-American elderly persons: findings of 7-year follow-up from the Hispanic established population for the epidemiological study of the elderly. *J Gerontol A Biol Sci Med Sci*. 2005;60:466-470.
- (222) Park HS, Cho SI, Song YM, Sung J. Multiple metabolic risk factors and total and cardiovascular mortality in men with low prevalence of obesity. *Atherosclerosis*. 2006;187:123-130.
- (223) Wyshak G. Underweight, smoking, exercise and mortality in women. *J Nutr Health Aging*. 2007;11:65-68.
- (224) Tocharoenvanich P, Yipintsoi T, Choomalee K, Boonwanno P, Rodklai A. Risk factors for a five-year death in the interASIA-south cohort. *J Med Assoc Thai*. 2008;91:471-478.
- (225) Saito I, Iso H, Kokubo Y, Inoue M, Tsugane S. Metabolic syndrome and all-cause and cardiovascular disease mortality: Japan Public Health Center-based Prospective (JPHC) Study. *Circ J*. 2009;73:878-884.
- (226) Carlsson AC, Theobald H, Wandell PE. Health factors and longevity in men and women: a 26-year follow-up study. *Eur J Epidemiol*. 2010;25:547-551.
- (227) Koch E, Romero T, Romero CX et al. Impact of education, income and chronic disease risk factors on mortality of adults: does 'a pauper-rich paradox' exist in Latin American societies? *Public Health*. 2010;124:39-48.
- (228) Wijnhoven HA, van Bokhorst-de van der Schueren MA, Heymans MW et al. Low mid-upper arm circumference, calf circumference, and body mass index and mortality in older persons. *J Gerontol A Biol Sci Med Sci*. 2010;65:1107-1114.
- (229) Zimmermann E, Holst C, Sorensen TI. Lifelong doubling of mortality in men entering adult life as obese. *Int J Obes (Lond)*. 2011;35:1193-1199.
- (230) Kondo T, Osugi S, Shimokata K et al. Metabolic syndrome and all-cause mortality, cardiac events, and cardiovascular events: a follow-up study in 25,471 young- and middle-aged Japanese men. *Eur J Cardiovasc Prev Rehabil*. 2011;18:574-580.
- (231) van den Brandt PA. The impact of a Mediterranean diet and healthy lifestyle on premature mortality in men and women. *Am J Clin Nutr*. 2011;94:913-920.
- (232) Yun JE, Won S, Kimm H, Jee SH. Effects of a combined lifestyle score on 10-year mortality in Korean men and women: a prospective cohort study. *BMC Public Health*. 2012;12:673.

- (233) Chakravarty EF, Hubert HB, Krishnan E, Bruce BB, Lingala VB, Fries JF. Lifestyle risk factors predict disability and death in healthy aging adults. *Am J Med.* 2012;125:190-197.
- (234) Ottenbacher AJ, Snih SA, Karmarkar A et al. Routine physical activity and mortality in Mexican Americans aged 75 and older. *J Am Geriatr Soc.* 2012;60:1085-1091.
- (235) Hamer M, Stamatakis E. Metabolically healthy obesity and risk of all-cause and cardiovascular disease mortality. *Journal of Clinical Endocrinology and Metabolism.* 2012;97:2482-2488.
- (236) Kim JY, Ko YJ, Rhee CW et al. Cardiovascular health metrics and all-cause and cardiovascular disease mortality among middle-aged men in Korea: the Seoul male cohort study. *J Prev Med Public Health.* 2013;46:319-328.
- (237) Elwood P, Galante J, Pickering J et al. Healthy lifestyles reduce the incidence of chronic diseases and dementia: evidence from the caerphilly cohort study. *PLoS One.* 2013;8:e81877.
- (238) Colpani V, Oppermann K, Spritzer PM. Causes of death and associated risk factors among climacteric women from Southern Brazil: a population based-study. *BMC Public Health.* 2014;14:194.
- (239) Sung KC, Ryu S, Cheong ES et al. All-Cause and Cardiovascular Mortality Among Koreans: Effects of Obesity and Metabolic Health. *Am J Prev Med.* 2015;49:62-71.
- (240) Koster A, Murphy RA, Eiriksdottir G et al. Fat distribution and mortality: The AGES-Reykjavik study. *Obesity 23 (4) (pp 893-897).* 2015;01.
- (241) Jeffreys M, McCarron P, Gunnell D, McEwen J, Smith GD. Body mass index in early and mid-adulthood, and subsequent mortality: a historical cohort study. *Int J Obes Relat Metab Disord.* 2003;27:1391-1397.
- (242) Heitmann BL, Erikson H, Ellsinger BM, Mikkelsen KL, Larsson B. Mortality associated with body fat, fat-free mass and body mass index among 60-year-old swedish men-a 22-year follow-up. The study of men born in 1913. *Int J Obes Relat Metab Disord.* 2000;24:33-37.
- (243) Zimmermann E, Berentzen TL, Angquist L, Holst C, Sorensen TI. Long-term weight changes in obese young adult men and subsequent all-cause mortality. *Int J Obes (Lond).* 2013;37:1020-1025.
- (244) Sonne-Holm S, Sorensen TI, Christensen U. Risk of early death in extremely overweight young men. *Br Med J (Clin Res Ed).* 1983;287:795-797.
- (245) Perlman JA, Wolf PH, Ray R, Lieberknecht G. Cardiovascular risk factors, premature heart disease, and all-cause mortality in a cohort of northern California women. *Am J Obstet Gynecol.* 1988;158:1568-1574.
- (246) Yao CH, Slattery ML, Jacobs DR, Jr., Folsom AR, Nelson ET. Anthropometric predictors of coronary heart disease and total mortality: findings from the US Railroad Study. *Am J Epidemiol.* 1991;134:1278-1289.
- (247) Lang IA, Llewellyn DJ, Alexander K, Melzer D. Obesity, physical function, and mortality in older adults. *J Am Geriatr Soc.* 2008;56:1474-1478.
- (248) Filardo G, Hamilton C. Modeling the effects of body mass index and waist-to-hip ratio on mortality [1]. *European Journal of Epidemiology.* 2007;22:745-746.
- (249) Bovet P, Paccaud F. Body-mass index and mortality. *The Lancet.* 2009;374:17.
- (250) Chien D-K, Chang W-H. Body mass index as a predictor of mortality in elderly people in Taiwan. *International Journal of Gerontology.* 2011;5:64.
- (251) Willett WC, Hu FB, Thun M. Overweight, obesity, and all-cause mortality. *JAMA - Journal of the American Medical Association.* 2013;309:24.
- (252) Yu Y. Cohort trends in the body mass-mortality association. *American journal of public health.* 2014;104:e3-e4.



- (253) Dowd JB, Zajacova A. Re: Body mass and weight change in adults in relation to mortality risk. *American Journal of Epidemiology*. 2014;179:1402.
- (254) Sjostrom LV. Mortality of severely obese subjects. *Am J Clin Nutr*. 1992;55:516S-523S.
- (255) Troiano RP, Frongillo EA, Jr., Sobal J, Levitsky DA. The relationship between body weight and mortality: a quantitative analysis of combined information from existing studies. *Int J Obes Relat Metab Disord*. 1996;20:63-75.
- (256) Effect of smoking on the body mass index-mortality relation: empirical evidence from 15 studies. BMI in Diverse Populations Collaborative Group. *Am J Epidemiol*. 1999;150:1297-1308.
- (257) Blair SN, Brodney S. Effects of physical inactivity and obesity on morbidity and mortality: current evidence and research issues. *Med Sci Sports Exerc*. 1999;31:S646-S662.
- (258) Seidell JC, Visscher TL, Hoogeveen RT. Overweight and obesity in the mortality rate data: current evidence and research issues. *Med Sci Sports Exerc*. 1999;31:S597-S601.
- (259) Zhou BF. Effect of body mass index on all-cause mortality and incidence of cardiovascular diseases--report for meta-analysis of prospective studies open optimal cut-off points of body mass index in Chinese adults. *Biomed Environ Sci*. 2002;15:245-252.
- (260) Katzmarzyk PT, Janssen I, Ardern CI. Physical inactivity, excess adiposity and premature mortality. *Obes Rev*. 2003;4:257-290.
- (261) McGee DL. Body mass index and mortality: a meta-analysis based on person-level data from twenty-six observational studies. *Ann Epidemiol*. 2005;15:87-97.
- (262) Janssen I, Mark AE. Elevated body mass index and mortality risk in the elderly. *Obes Rev*. 2007;8:41-59.
- (263) de Hollander EL, Boshuizen HC, De Groot CPGM, Bemelmans WJE. Associations of waist circumference, overweight and underweight with increased mortality risks in the elderly: A meta-analysis of 15 cohorts involving more than 20,000 65- to -75-year olds. *Obesity Reviews Conference: 18th European Congress on Obesity, ECO 2011 Istanbul Turkey*. 2011;12:23.
- (264) Flegal KM, Kit BK, Orpana H, Graubard BI. Association of all-cause mortality with overweight and obesity using standard body mass index categories: a systematic review and meta-analysis. *JAMA*. 2013;309:71-82.
- (265) Savva SC, Lamnisos D, Kafatos AG. Predicting cardiometabolic risk: Waist-to-height ratio or BMI. A meta-analysis. *Diabetes, Metabolic Syndrome and Obesity: Targets and Therapy*. 2013;6:23.
- (266) Winter JE, Macinnis RJ, Wattanapenpaiboon N, Nowson CA. BMI and all-cause mortality in older adults: a meta-analysis. *Am J Clin Nutr*. 2014;99:875-890.
- (267) Flegal KM, Kit BK, Graubard BI. Body mass index categories in observational studies of weight and risk of death. *Am J Epidemiol*. 2014;180:288-296.
- (268) Mehta T, Fontaine KR, Keith SW et al. Obesity and mortality: are the risks declining? Evidence from multiple prospective studies in the United States. *Obes Rev*. 2014;15:619-629.
- (269) Roberson LL, Aneni EC, Maziak W et al. Beyond BMI: The "Metabolically healthy obese" phenotype & its association with clinical/subclinical cardiovascular disease and all-cause mortality -- a systematic review. *BMC public health*. 2014;14:14.
- (270) Wang Z. Age-dependent decline of association between obesity and mortality: a systematic review and meta-analysis. *Obes Res Clin Pract*. 2015;9:1-11.

- (271) Veronese N, Cereda E, Solmi M et al. Inverse relationship between body mass index and mortality in older nursing home residents: a meta-analysis of 19,538 elderly subjects. *Obes Rev.* 2015;16:1001-1015.
- (272) Lakoski SG, Le AH, Muntner P et al. Adiposity, inflammation, and risk for death in black and white men and women in the United States: the Reasons for Geographic and Racial Differences in Stroke (REGARDS) study. *J Clin Endocrinol Metab.* 2011;96:1805-1814.
- (273) Chen L-Y, Peng L-N, Liu L-K et al. Body mass index, health status, and mortality of older Taiwanese men: Overweight good, underweight bad, obesity neutral. *Journal of the American Geriatrics Society.* 2013;61:December.
- (274) Evans MF, Frank J. Body weight and mortality among women. *Can Fam Physician.* 1997;43:455.
- (275) Dick A, Suskin N. Fitness, fatness, and mortality in men. *Clin J Sport Med.* 1999;9:187.
- (276) Printz C. Extreme obesity may shorten life expectancy up to 14 years. *Cancer.* 2014;120:3591.
- (277) Takala JK, Mattila KJ, Ryyananen OP. Overweight, underweight and mortality among the aged. *Scand J Prim Health Care.* 1994;12:244-248.
- (278) Selmer R, Tverdal A. Body mass index and cardiovascular mortality at different levels of blood pressure: a prospective study of Norwegian men and women. *J Epidemiol Community Health.* 1995;49:265-270.
- (279) Herskind AM, McGue M, Iachine IA et al. Untangling genetic influences on smoking, body mass index and longevity: a multivariate study of 2464 Danish twins followed for 28 years. *Hum Genet.* 1996;98:467-475.
- (280) Tunstall-Pedoe H, Woodward M, Tavendale R, A'Brook R, McCluskey MK. Comparison of the prediction by 27 different factors of coronary heart disease and death in men and women of the Scottish Heart Health Study: cohort study. *BMJ.* 1997;315:722-729.
- (281) Rogers RG, Hummer RA, Krueger PM. The effect of obesity on overall, circulatory disease- and diabetes-specific mortality. *J Biosoc Sci.* 2003;35:107-129.
- (282) Ejlertsson G, Lindholm L, Schersten B. Is fatness really a risk indicator of death? A 10-16-year prospective study of patients attending the primary health care services. *Scand J Prim Health Care.* 1985;3:201-205.
- (283) Cornoni-Huntley JC, Harris TB, Everett DF et al. An overview of body weight of older persons, including the impact on mortality. The National Health and Nutrition Examination Survey I--Epidemiologic Follow-up Study. *J Clin Epidemiol.* 1991;44:743-753.
- (284) Campbell AJ, Spears GF, Brown JS, Busby WJ, Borrie MJ. Anthropometric measurements as predictors of mortality in a community population aged 70 years and over. *Age Ageing.* 1990;19:131-135.
- (285) Larsson B, Svardsudd K, Welin L. Abdominal adipose tissue distribution, obesity, and risk of cardiovascular disease and death: 13 year follow up of participants in the study of men born in 1913. *British Medical Journal.* 1984;288:1401-1404.
- (286) Keys A, Taylor HL, Blackburn H, Brozek J, Anderson JT, Simonson E. Mortality and coronary heart disease among men studied for 23 years. *Arch Intern Med.* 1971;128:201-214.
- (287) Lapidus L, Bengtsson C, Larsson B, Pennert K, Rybo E, Sjostrom L. Distribution of adipose tissue and risk of cardiovascular disease and death: a 12 year follow up of participants in the population study of women in Gothenburg, Sweden. *Br Med J (Clin Res Ed).* 1984;289:1257-1261.

- (288) Vandenbroucke JP, Mauritz BJ, de BA, Verheesen JH, van dH-W, van der Heide RM. Weight, smoking, and mortality. *JAMA*. 1984;252:2859-2860.
- (289) Feinleib M. Epidemiology of obesity in relation to health hazards. *Ann Intern Med*. 1985;103:1019-1024.
- (290) Wannamethee G, Shaper AG. Body weight and mortality in middle aged British men: impact of smoking. *BMJ*. 1989;299:1497-1502.
- (291) Tsukamoto H, Sano F. Body weight and longevity: insurance experience in Japan. *Diabetes Res Clin Pract*. 1990;10 Suppl 1:S119-S125.
- (292) Rajala SA, Kanto AJ, Haavisto MV, Kaarela RH, Koivunen MJ, Heikinheimo RJ. Body weight and the three-year prognosis in very old people. *Int J Obes*. 1990;14:997-1003.
- (293) Lapidus L, Bengtsson C, Lissner L. Distribution of adipose tissue in relation to cardiovascular and total mortality as observed during 20 years in a prospective population study of women in Gothenburg, Sweden. *Diabetes Res Clin Pract*. 1990;10 Suppl 1:S185-S189.
- (294) Kinney EL, Caldwell JW. Relationship between body weight and mortality in men aged 75 years and older. *South Med J*. 1990;83:1256-1258.
- (295) Pekkanen J, Manton KG, Stallard E, Nissinen A, Karvonen MJ. Risk factor dynamics, mortality and life expectancy differences between eastern and western Finland: the Finnish Cohorts of the Seven Countries Study. *Int J Epidemiol*. 1992;21:406-419.
- (296) Menotti A, Descovich GC, Lanti M, Spagnolo A, Dormi A, Seccareccia F. Indexes of obesity and all-causes mortality in Italian epidemiological data. *Prev Med*. 1993;22:293-303.
- (297) Cupples LA, Gagnon DR, Ramaswamy R, D'Agostino RB. Age-adjusted survival curves with application in the Framingham Study. *Stat Med*. 1995;14:1731-1744.
- (298) Allison DB, Faith MS, Heo M, Kotler DP. Hypothesis concerning the U-shaped relation between body mass index and mortality. *Am J Epidemiol*. 1997;146:339-349.
- (299) Lindberg O, Tilvis RS, Strandberg TE et al. Impacts of components of the metabolic syndrome on health status and survival in an aged population. *Eur J Epidemiol*. 1997;13:429-434.
- (300) Carmelli D, Zhang H, Swan GE. Obesity and 33-year follow-up for coronary heart disease and cancer mortality. *Epidemiology*. 1997;8:378-383.
- (301) Diehr P, Bild DE, Harris TB, Duxbury A, Siscovick D, Rossi M. Body mass index and mortality in nonsmoking older adults: the Cardiovascular Health Study. *Am J Public Health*. 1998;88:623-629.
- (302) Fontaine KR, Heo M, Cheskin LJ, Allison DB. Body mass index, smoking, and mortality among older American women. *J Womens Health*. 1998;7:1257-1261.
- (303) Sempos CT, Durazo-Arvizu R, McGee DL, Cooper RS, Prewitt TE. The influence of cigarette smoking on the association between body weight and mortality. The Framingham Heart Study revisited. *Ann Epidemiol*. 1998;8:289-300.
- (304) Schulte H, Cullen P, Assmann G. Obesity, mortality and cardiovascular disease in the Munster Heart Study (PROCAM). *Atherosclerosis*. 1999;144:199-209.
- (305) McDonald SP, Wang Z, Hoy WE. Physical and biochemical predictors of death in an Australian aboriginal cohort. *Clin Exp Pharmacol Physiol*. 1999;26:618-621.
- (306) Allison DB, Heo M, Flanders DW, Faith MS, Carpenter KM, Williamson DF. Simulation study of the effects of excluding early deaths on risk factor-mortality analyses in the presence of confounding due to occult disease: the example of body mass index. *Ann Epidemiol*. 1999;9:132-142.

- (307) Welborn TA, Knuiman MW, Vu HT. Body mass index and alternative indices of obesity in relation to height, triceps skinfold and subsequent mortality: the Busselton health study. *Int J Obes Relat Metab Disord*. 2000;24:108-115.
- (308) Zhou B, Wu Y, Yang J, Li Y, Zhang H, Zhao L. Overweight is an independent risk factor for cardiovascular disease in Chinese populations. *Obesity Reviews*. 2002;3:147-156.
- (309) Strandberg A, Strandberg TE, Salomaa VV, Pitkala K, Hapola O, Miettinen TA. A follow-up study found that cardiovascular risk in middle age predicted mortality and quality of life in old age. *J Clin Epidemiol*. 2004;57:415-421.
- (310) Schnohr C, Hojbjerg L, Riegels M et al. Does educational level influence the effects of smoking, alcohol, physical activity, and obesity on mortality? A prospective population study. *Scand J Public Health*. 2004;32:250-256.
- (311) Menotti A, Kromhout D, Blackburn H, Jacobs D, Lanti M. Forty-year mortality from cardiovascular diseases and all causes of death in the US Railroad cohort of the Seven Countries Study. *Eur J Epidemiol*. 2004;19:417-424.
- (312) Tsubono Y, Koizumi Y, Nakaya N et al. Health practices and mortality in Japan: combined effects of smoking, drinking, walking and body mass index in the Miyagi Cohort Study. *J Epidemiol*. 2004;14 Suppl 1:S39-S45.
- (313) Menotti A, Lanti M, Maiani G, Kromhout D. Forty-year mortality from cardiovascular diseases and their risk factors in men of the Italian rural areas of the Seven Countries Study. *Acta Cardiol*. 2005;60:521-531.
- (314) Gronniger JT. A semiparametric analysis of the relationship of body mass index to mortality. *Am J Public Health*. 2006;96:173-178.
- (315) Flegal KM, Graubard BI, Williamson DF, Gail MH. Cause-specific excess deaths associated with underweight, overweight, and obesity. *JAMA*. 2007;298:2028-2037.
- (316) Flegal KM, Graubard BI. Estimates of excess deaths associated with body mass index and other anthropometric variables. *Am J Clin Nutr*. 2009;89:1213-1219.
- (317) Kuk JL, Ardern CI. Influence of age on the association between various measures of obesity and all-cause mortality. *J Am Geriatr Soc*. 2009;57:2077-2084.
- (318) Thinggaard M, Jacobsen R, Jeune B, Martinussen T, Christensen K. Is the relationship between BMI and mortality increasingly U-shaped with advancing age? A 10-year follow-up of persons aged 70-95 years. *J Gerontol A Biol Sci Med Sci*. 2010;65:526-531.
- (319) Dobson A, McLaughlin D, Vagenas D, Wong KY. Why are death rates higher in rural areas? Evidence from the Australian Longitudinal Study on Women's Health. *Aust N Z J Public Health*. 2010;34:624-628.
- (320) Gambino KK, Zumpano J, Brennan DM, Hoogwerf BJ. High school body mass index and body mass index at entry to a cardiac disease risk prevention clinic and the association to all-cause mortality and coronary heart disease: a PreCIS database study. *The Journal of cardiovascular nursing*. 2010;25:99-105.
- (321) Balboa-Castillo T, Guallar-Castillon P, Leon-Munoz LM, Graciani A, Lopez-Garcia E, Rodriguez-Artalejo F. Physical activity and mortality related to obesity and functional status in older adults in Spain. *Am J Prev Med*. 2011;40:39-46.
- (322) Neovius K, Rehnberg C, Rasmussen F, Neovius M. Lifetime productivity losses associated with obesity status in early adulthood: a population-based study of Swedish men. *Appl Health Econ Health Policy*. 2012;10:309-317.
- (323) Samper-Ternent R, Kuo YF, Ray LA, Ottenbacher KJ, Markides KS, Al SS. Prevalence of health conditions and predictors of mortality in oldest old Mexican Americans and non-Hispanic whites. *J Am Med Dir Assoc*. 2012;13:254-259.

- (324) Strandberg TE, Sirola J, Pitkala KH, Tilvis RS, Strandberg AY, Stenholm S. Association of midlife obesity and cardiovascular risk with old age frailty: A 26-year follow-up of initially healthy men. *International Journal of Obesity*. 2012;36:1153-1157.
- (325) Menotti A, Puddu PE, Lanti M, Maiani G, Fidanza F. Cardiovascular risk factors predict survival in middle-aged men during 50 years. *Eur J Intern Med*. 2013;24:67-74.
- (326) Chuang SY, Chang HY, Lee MS, Chia-Yu CR, Pan WH. Skeletal muscle mass and risk of death in an elderly population. *Nutr Metab Cardiovasc Dis*. 2014;24:784-791.
- (327) He J, Yu Q, Zhang H, Mahnken JD. The dynamic association of body mass index and all-cause mortality in multiple cohorts and its impacts. *Emerg Themes Epidemiol*. 2014;11:17.
- (328) Rolland Y, Gallini A, Cristini C et al. Body-composition predictors of mortality in women aged  $\geq 75$  y: data from a large population-based cohort study with a 17-y follow-up. *Am J Clin Nutr*. 2014;100:1352-1360.
- (329) Peter RS, Mayer B, Concin H, Nagel G. The effect of age on the shape of the BMI-mortality relation and BMI associated with minimum all-cause mortality in a large Austrian cohort. *Int J Obes (Lond)*. 2015;39:530-534.
- (330) Peeters GM, Herber-Gast GC, Dobson AJ, Brown WJ. Changes in the Relationships Between Body Mass Index and Health Outcomes Across Middle Age and Older Adulthood. *Mayo Clin Proc*. 2015;90:903-910.
- (331) Song X, Jousilahti P, Stehouwer CD et al. Cardiovascular and all-cause mortality in relation to various anthropometric measures of obesity in Europeans. *Nutr Metab Cardiovasc Dis*. 2015;25:295-304.
- (332) Iribarren C, Sharp DS, Burchfiel CM, Petrovitch H. Association of weight loss and weight fluctuation with mortality among Japanese American men. *N Engl J Med*. 1995;333:686-692.
- (333) Emberson JR, Whincup PH, Morris RW, Wannamethee SG, Shaper AG. Lifestyle and cardiovascular disease in middle-aged British men: the effect of adjusting for within-person variation. *Eur Heart J*. 2005;26:1774-1782.
- (334) Kim J, Meade T, Haines A. Skinfold thickness, body mass index, and fatal coronary heart disease: 30 year follow up of the Northwick Park heart study. *J Epidemiol Community Health*. 2006;60:275-279.
- (335) Jackson CL, Wang NY, Yeh HC, Szklo M, Dray-Spira R, Brancati FL. Body-mass index and mortality risk in US Blacks compared to Whites. *Obesity (Silver Spring)*. 2014;22:842-851.
- (336) Zhu S, Kondo T, Sakakibara H et al. Influence of life-related factors and participation in health examination on mortality in a 4.5-year follow-up of a rural cohort. *Environ Health Prev Med*. 2000;5:66-71.
- (337) Durazo-Arvizu R, McGee D, Li Z, Cooper R. Establishing the nadir of the body mass index-mortality relationship: a case study. *J Am Stat Assoc*. 1997;92:1312-1319.
- (338) Greenberg JA. Biases in the mortality risk versus body mass index relationship in the NHANES-1 Epidemiologic Follow-Up Study. *Int J Obes Relat Metab Disord*. 2001;25:1071-1078.
- (339) Fraser GE, Shavlik DJ. Ten years of life: Is it a matter of choice? *Arch Intern Med*. 2001;161:1645-1652.
- (340) Masters RK, Reither EN, Powers DA, Yang YC, Burger AE, Link BG. The impact of obesity on US mortality levels: the importance of age and cohort factors in population estimates. *Am J Public Health*. 2013;103:1895-1901.

- (341) Stevens J, Cai J, Pamuk ER, Williamson DF, Thun MJ, Wood JL. The effect of age on the association between body-mass index and mortality. *N Engl J Med*. 1998;338:1-7.
- (342) Sergi G, Perissinotto E, Pisent C et al. An adequate threshold for body mass index to detect underweight condition in elderly persons: the Italian Longitudinal Study on Aging (ILSA). *J Gerontol A Biol Sci Med Sci*. 2005;60:866-871.
- (343) Jarrett RJ, Shipley MJ, Rose G. Weight and mortality in the Whitehall Study. *Br Med J (Clin Res Ed)*. 1982;285:535-537.
- (344) Andres R. The obesity-mortality association: where is the nadir of the U-shaped curve? *Trans Assoc Life Insur Med Dir Am*. 1980;64:185-197.
- (345) Banegas JR, Lopez-Garcia E, Gutierrez-Fisac JL, Guallar-Castillon P, Rodriguez-Artalejo F. A simple estimate of mortality attributable to excess weight in the European Union. *Eur J Clin Nutr*. 2003;57:201-208.
- (346) Banegas JR, Rodriguez-Artalejo F, Graciani A, Villar F, Herruzo R. Mortality attributable to cardiovascular risk factors in Spain. *Eur J Clin Nutr*. 2003;57 Suppl 1:S18-S21.
- (347) Flegal KM, Graubard BI, Williamson DF. Methods of calculating deaths attributable to obesity. *Am J Epidemiol*. 2004;160:331-338.
- (348) Katzmarzyk PT, Ardern CI. Overweight and obesity mortality trends in Canada, 1985-2000. *Can J Public Health*. 2004;95:16-20.
- (349) Welch HG, Schwartz LM, Woloshin S. The exaggerated relations between diet, body weight and mortality: the case for a categorical data approach. *CMAJ*. 2005;172:891-895.
- (350) Joubert J, Norman R, Bradshaw D, Goedecke JH, Steyn NP, Puoane T. Estimating the burden of disease attributable to excess body weight in South Africa in 2000. *S Afr Med J*. 2007;97:683-690.
- (351) Robins JM. Causal models for estimating the effects of weight gain on mortality. *Int J Obes (Lond)*. 2008;32 Suppl 3:S15-S41.
- (352) Levine BJ. The other causality question: estimating attributable fractions for obesity as a cause of mortality. *Int J Obes (Lond)*. 2008;32 Suppl 3:S4-S7.
- (353) Cooper RS. Which factors confound or modify the relationship between body weight and mortality? *Int J Obes (Lond)*. 2008;32 Suppl 3:S47-S51.
- (354) Cheskin LJ, Gange SJ. BMI <22.5 and >25 predicted higher overall mortality in adults. *Evidence-Based Medicine*. 2009;14:152.
- (355) Lapidus L. Ischaemic heart disease, stroke and total mortality in women--results from a prospective population study in Gothenburg, Sweden. *Acta Med Scand Suppl*. 1985;705:1-42.
- (356) Duijkers TJ, Kromhout D, Spruit IP, Doornbos G. Inter-mediating risk factors in the relation between socioeconomic status and 25-year mortality (the Zutphen Study). *Int J Epidemiol*. 1989;18:658-662.
- (357) Henry CJ. Body mass index and the limits of human survival. *Eur J Clin Nutr*. 1990;44:329-335.
- (358) Stern MP, Patterson JK, Mitchell BD, Haffner SM, Hazuda HP. Overweight and mortality in Mexican Americans. *Int J Obes*. 1990;14:623-629.
- (359) Bennett SA. Inequalities in risk factors and cardiovascular mortality among Australia's immigrants. *Aust J Public Health*. 1993;17:251-261.
- (360) Allison DB, Heo M, Flanders DW, Faith MS, Williamson DF. Examination of "early mortality exclusion" as an approach to control for confounding by occult disease in epidemiologic studies of mortality risk factors. *Am J Epidemiol*. 1997;146:672-680.
- (361) Morava E, Vegh E, Bona I, Kiss I, Oroszi B, Jozan P. Health risk factors and mortality in Pecs City, Hungary in the 1990s. *Cent Eur J Public Health*. 2000;8:109-113.

- (362) Ni MC, Turley M, Stefanogiannis N et al. Mortality attributable to higher-than-optimal body mass index in New Zealand. *Public Health Nutr.* 2005;8:402-408.
- (363) Durazo-Arvizu RA, Cooper RS. Issues related to modeling the body mass index-mortality association: the shape of the association and the effects of smoking status. *Int J Obes (Lond).* 2008;32 Suppl 3:S52-S55.
- (364) Kengne AP, Awah PK. Classical cardiovascular risk factors and all-cause mortality in rural Cameroon. *QJM.* 2009;102:209-215.
- (365) Losina E, Walensky RP, Reichmann WM et al. Impact of obesity and knee osteoarthritis on morbidity and mortality in older Americans. *Ann Intern Med.* 2011;154:217-226.
- (366) Petersen L, Sorensen TI. Studies based on the Danish Adoption Register: schizophrenia, BMI, smoking, and mortality in perspective. *Scand J Public Health.* 2011;39:191-195.
- (367) Gordon-Dseagu VLZ, Shelton N, Mindell J. Diabetes, overweight/obesity and all-cause and cause-specific mortality: Evidence from the health survey for England and scottish health survey linked to mortality data. *J Diabetes Complications.* 2014;28:791-797.
- (368) Fernandez-Rodriguez E, Lopez-Raton M, Andujar P et al. Epidemiology, mortality rate and survival in a homogeneous population of hypopituitary patients. *Clin Endocrinol (Oxf).* 2013;78:278-284.
- (369) Epstein FH. Estimating the effect of preventing obesity on total mortality and hypertension. *Int J Obes.* 1979;3:163-166.
- (370) Tsevat J, Weinstein MC, Williams LW, Tosteson AN, Goldman L. Expected gains in life expectancy from various coronary heart disease risk factor modifications. *Circulation.* 1991;83:1194-1201.
- (371) Heir T, Erikssen J, Sandvik L. Life style and longevity among initially healthy middle-aged men: prospective cohort study. *BMC Public Health.* 2013;13:831.
- (372) Filipovsky J, Ducimetiere P, Darne B, Richard JL. Abdominal body mass distribution and elevated blood pressure are associated with increased risk of death from cardiovascular diseases and cancer in middle-aged men. The results of a 15- to 20-year follow-up in the Paris prospective study I. *Int J Obes Relat Metab Disord.* 1993;17:197-203.
- (373) Marber M. Body-mass index and cause-specific mortality in 900 000 adults: Collaborative analyses of 57 prospective studies. *Heart and Metabolism.* 2009;38-39.
- (374) Block JP. Obesity associated with higher mortality for black women. *Journal of Clinical Outcomes Management.* 2011;18:544-546.
- (375) Borrelli R, Isernia C, Di BG, Contaldo F. Mortality rate, causes and predictive factors of death in severely obese patients. *Int J Vitam Nutr Res.* 1988;58:343-350.
- (376) Mirabelli D, Chiusolo M, Ferrante D, Balzola F, Merletti F, Petroni ML. Long-term mortality in a cohort of severely obese persons in Italy. *Obesity (Silver Spring).* 2008;16:1920-1925.
- (377) Bender R, Trautner C, Spraul M, Berger M. Assessment of excess mortality in obesity. *Am J Epidemiol.* 1998;147:42-48.
- (378) Bender R, Jockel KH, Trautner C, Spraul M, Berger M. Effect of age on excess mortality in obesity. *JAMA.* 1999;281:1498-1504.
- (379) Bender R, Jockel KH, Richter B, Spraul M, Berger M. Body weight, blood pressure, and mortality in a cohort of obese patients. *Am J Epidemiol.* 2002;156:239-245.
- (380) Bender R, Zeeb H, Schwarz M, Jockel KH, Berger M. Causes of death in obesity: relevant increase in cardiovascular but not in all-cancer mortality. *J Clin Epidemiol.* 2006;59:1064-1071.

- (381) Crews DE. Body weight, blood pressure and the risk of total and cardiovascular mortality in an obese population. *Hum Biol.* 1988;60:417-433.
- (382) Deubner DC, Wilkinson WE, Helms MJ, Tyroler HA, Hames CG. Logistic model estimation of death attributable to risk factors for cardiovascular disease in Evans County, Georgia. *Am J Epidemiol.* 1980;112:135-143.
- (383) Higgins M, Kannel W, Garrison R, Pinsky J, Stokes J, III. Hazards of obesity--the Framingham experience. *Acta Med Scand Suppl.* 1988;723:23-36.
- (384) Keys A. Longevity of man: relative weight and fatness in middle age. *Ann Med.* 1989;21:163-168.
- (385) Imeson JD, Haines AP, Meade TW. Skinfold thickness, body mass index and ischaemic heart disease. *J Epidemiol Community Health.* 1989;43:223-227.
- (386) Wilcosky T, Hyde J, Anderson JJ, Bangdiwala S, Duncan B. Obesity and mortality in the Lipid Research Clinics Program Follow-up Study. *J Clin Epidemiol.* 1990;43:743-752.
- (387) Hoes AW, Grobbee DE, Valkenburg HA, Lubsen J, Hofman A. Cardiovascular risk and all-cause mortality; a 12 year follow-up study in The Netherlands. *Eur J Epidemiol.* 1993;9:285-292.
- (388) Davis CE, Deev AD, Shestov DB et al. Correlates of mortality in Russian and US women. The Lipid Research Clinics Program. *Am J Epidemiol.* 1994;139:369-379.
- (389) Miller JP, Perry HM, Jr., Rossiter JE, Baty JD, Carmody SE, Sambhi MP. Regional differences in mortality during 15-year follow-up of 11,936 hypertensive veterans. *Hypertension.* 1994;23:431-438.
- (390) Toshima H, Koga Y, Menotti A et al. The seven countries study in Japan. Twenty-five-year experience in cardiovascular and all-causes deaths. *Jpn Heart J.* 1995;36:179-189.
- (391) Collins VR, Dowse GK, Cabealawa S, Ram P, Zimmet PZ. High mortality from cardiovascular disease and analysis of risk factors in Indian and Melanesian Fijians. *Int J Epidemiol.* 1996;25:59-69.
- (392) Menotti A, Kromhout D, Nissinen A et al. Short-term all-cause mortality and its determinants in elderly male populations in Finland, The Netherlands, and Italy: the FINE Study. Finland, Italy, Netherlands Elderly Study. *Prev Med.* 1996;25:319-326.
- (393) Allison DB, Gallagher D, Heo M, Pi-Sunyer FX, Heymsfield SB. Body mass index and all-cause mortality among people age 70 and over: the Longitudinal Study of Aging. *Int J Obes Relat Metab Disord.* 1997;21:424-431.
- (394) Dorn JM, Schisterman EF, Winkelstein W, Jr., Trevisan M. Body mass index and mortality in a general population sample of men and women. The Buffalo Health Study. *Am J Epidemiol.* 1997;146:919-931.
- (395) Woo J, Ho SC, Yuen YK, Yu LM, Lau J. Cardiovascular risk factors and 18-month mortality and morbidity in an elderly Chinese population aged 70 years and over. *Gerontology.* 1998;44:51-55.
- (396) Dontas AS, Menotti A, Aravanis C, Ioannidis P, Seccareccia F. Comparative total mortality in 25 years in Italian and Greek middle aged rural men. *J Epidemiol Community Health.* 1998;52:638-644.
- (397) Menotti A, Giampaoli S, Seccareccia F. The relationship of cardiovascular risk factors measured at different ages to prediction of all-cause mortality and longevity. *Arch Gerontol Geriatr.* 1998;26:99-111.
- (398) Sanchez AM, Reed DR, Price RA. Reduced mortality associated with body mass index (BMI) in African Americans relative to Caucasians. *Ethn Dis.* 2000;10:24-30.



- (399) Wassertheil-Smoller S, Fann C, Allman RM et al. Relation of low body mass to death and stroke in the systolic hypertension in the elderly program. The SHEP Cooperative Research Group. *Arch Intern Med.* 2000;160:494-500.
- (400) Froom P, Kristal-Boneh E, Melamed S, Harari G, Benbassat J, Ribak J. Serum total cholesterol and cardiovascular mortality in Israeli males: the CORDIS Study. Cardiovascular Occupational Risk Factor Determination in Israeli Industry. *Isr Med Assoc J.* 2000;2:668-671.
- (401) Menotti A, Blackburn H, Kromhout D, Nissinen A, Adachi H, Lanti M. Cardiovascular risk factors as determinants of 25-year all-cause mortality in the seven countries study. *Eur J Epidemiol.* 2001;17:337-346.
- (402) Menotti A, Mulder I, Nissinen A et al. Cardiovascular risk factors and 10-year all-cause mortality in elderly European male populations; the FINE study. Finland, Italy, Netherlands, Elderly. *Eur Heart J.* 2001;22:573-579.
- (403) Katzmarzyk PT, Craig CL, Bouchard C. Adiposity, adipose tissue distribution and mortality rates in the Canada Fitness Survey follow-up study. *Int J Obes Relat Metab Disord.* 2002;26:1054-1059.
- (404) Allison DB, Zhu SK, Plankey M, Faith MS, Heo M. Differential associations of body mass index and adiposity with all-cause mortality among men in the first and second National Health and Nutrition Examination Surveys (NHANES I and NHANES II) follow-up studies. *Int J Obes Relat Metab Disord.* 2002;26:410-416.
- (405) Zhu S, Heo M, Plankey M, Faith MS, Allison DB. Associations of body mass index and anthropometric indicators of fat mass and fat free mass with all-cause mortality among women in the first and second National Health and Nutrition Examination Surveys follow-up studies. *Ann Epidemiol.* 2003;13:286-293.
- (406) Nybo H, Petersen HC, Gaist D et al. Predictors of mortality in 2,249 nonagenarians--the Danish 1905-Cohort Survey. *J Am Geriatr Soc.* 2003;51:1365-1373.
- (407) Linares C, Su D. Body mass index and health among Union Army veterans: 1891-1905. *Econ Hum Biol.* 2005;3:367-387.
- (408) Janssen I, Katzmarzyk PT, Ross R. Body mass index is inversely related to mortality in older people after adjustment for waist circumference. *J Am Geriatr Soc.* 2005;53:2112-2118.
- (409) Hays JC, Keller HH, Ostbye T. The effects of nutrition-related factors on four-year mortality among a biracial sample of community-dwelling elders in the North Carolina piedmont. *J Nutr Elder.* 2005;25:41-67.
- (410) Lindqvist P, Andersson K, Sundh V, Lissner L, Bjorkelund C, Bengtsson C. Concurrent and separate effects of body mass index and waist-to-hip ratio on 24-year mortality in the Population Study of Women in Gothenburg: evidence of age-dependency. *Eur J Epidemiol.* 2006;21:789-794.
- (411) Menotti A, Lanti M, Maiani G, Kromhout D. Determinants of longevity and all-cause mortality among middle-aged men. Role of 48 personal characteristics in a 40-year follow-up of Italian Rural Areas in the Seven Countries Study. *Aging Clin Exp Res.* 2006;18:394-406.
- (412) Amador LF, Al SS, Markides KS, Goodwin JS. Weight change and mortality among older Mexican Americans. *Aging Clin Exp Res.* 2006;18:196-204.
- (413) Nguyen ND, Center JR, Eisman JA, Nguyen TV. Bone loss, weight loss, and weight fluctuation predict mortality risk in elderly men and women. *J Bone Miner Res.* 2007;22:1147-1154.
- (414) Welborn TA, Dhaliwal SS. Preferred clinical measures of central obesity for predicting mortality. *Eur J Clin Nutr.* 2007;61:1373-1379.

- (415) Ammar KA, Redfield MM, Mahoney DW, Johnson M, Jacobsen SJ, Rodeheffer RJ. Central obesity: association with left ventricular dysfunction and mortality in the community. *Am Heart J*. 2008;156:975-981.
- (416) Cumming ME, Pinkham CA. Comparison of body mass index and waist circumference as predictors of all-cause mortality in a male insured lives population. *J Insur Med*. 2008;40:26-33.
- (417) Abbott RD, Ueshima H, Hozawa A et al. Risk factor effects and total mortality in older Japanese men in Japan and Hawaii. *Ann Epidemiol*. 2008;18:913-918.
- (418) Srikanthan P, Seeman TE, Karlamangla AS. Waist-hip-ratio as a predictor of all-cause mortality in high-functioning older adults. *Ann Epidemiol*. 2009;19:724-731.
- (419) Taylor AE, Ebrahim S, Ben-Shlomo Y et al. Comparison of the associations of body mass index and measures of central adiposity and fat mass with coronary heart disease, diabetes, and all-cause mortality: a study using data from 4 UK cohorts. *Am J Clin Nutr*. 2010;91:547-556.
- (420) Schneider HJ, Friedrich N, Klotsche J et al. The predictive value of different measures of obesity for incident cardiovascular events and mortality. *J Clin Endocrinol Metab*. 2010;95:1777-1785.
- (421) Calori G, Lattuada G, Ragogna F et al. Fatty liver index and mortality: the Cremona study in the 15th year of follow-up. *Hepatology*. 2011;54:145-152.
- (422) Puddu PE, Menotti A. Artificial neural networks versus proportional hazards Cox models to predict 45-year all-cause mortality in the Italian Rural Areas of the Seven Countries Study. *BMC Med Res Methodol*. 2012;12:100.
- (423) Mihel S, Milanovic SM. Association of elevated body mass index and hypertension with mortality: the CroHort study. *Coll Antropol*. 2012;36 Suppl 1:183-188.
- (424) McNeely MJ, Shofer JB, Leonetti DL, Fujimoto WY, Boyko EJ. Associations among visceral fat, all-cause mortality, and obesity-related mortality in Japanese Americans. *Diabetes Care*. 2012;35:296-298.
- (425) Toss F, Wiklund P, Nordstrom P, Nordstrom A. Body composition and mortality risk in later life. *Age Ageing*. 2012;41:677-681.
- (426) Katzmarzyk PT, Mire E, Bray GA, Greenway FL, Heymsfield SB, Bouchard C. Anthropometric markers of obesity and mortality in white and African American adults: the pennington center longitudinal study. *Obesity (Silver Spring)*. 2013;21:1070-1075.
- (427) Svejme O, Ahlborg HG, Nilsson JA, Karlsson MK. Low BMD is an independent predictor of fracture and early menopause of mortality in post-menopausal women--a 34-year prospective study. *Maturitas*. 2013;74:341-345.
- (428) Genton L, Graf CE, Karsegard VL, Kyle UG, Pichard C. Low fat-free mass as a marker of mortality in community-dwelling healthy elderly subjects. *Age Ageing*. 2013;42:33-39.
- (429) Carlsson AC, Wandell PE, Gigante B, Leander K, Hellenius ML, de FU. Seven modifiable lifestyle factors predict reduced risk for ischemic cardiovascular disease and all-cause mortality regardless of body mass index: a cohort study. *Int J Cardiol*. 2013;168:946-952.
- (430) Thomas F, Pannier B, Benetos A, Vischer UM. Visceral obesity is not an independent risk factor of mortality in subjects over 65 years. *Vascular Health and Risk Management*. 2013;9:739-745.
- (431) Bombelli M, Facchetti R, Fodri D et al. Impact of body mass index and waist circumference on the cardiovascular risk and all-cause death in a general population: Data from the PAMELA study. *Nutrition, Metabolism and Cardiovascular Diseases*. 2013;23:650-656.

- (432) Ashwell M, Mayhew L, Richardson J, Rickayzen B. Waist-to-Height Ratio Is More Predictive of Years of Life Lost than Body Mass Index. *PLoS One*. 2014;9:e103483.
- (433) Dhana K, Kavousi M, Ikram MA, Tiemeier HW, Hofman A, Franco OH. Body shape index in comparison with other anthropometric measures in prediction of total and cause-specific mortality. *J Epidemiol Community Health*. 2015;doi: 10.1136/jech-2014-205257. [Epub ahead of print].
- (434) Franzon K, Zethelius B, Cederholm T, Kilander L. Modifiable midlife risk factors, independent aging, and survival in older men: report on long-term follow-up of the Uppsala Longitudinal Study of Adult Men cohort. *J Am Geriatr Soc*. 2015;63:877-885.
- (435) Hartz A, He T, Rimm A. Comparison of adiposity measures as risk factors in postmenopausal women. *J Clin Endocrinol Metab*. 2012;97:227-233.
- (436) Inoue K, Shono T, Toyokawa S, Kawakami M. Body mass index as a predictor of mortality in community-dwelling seniors. *Aging Clinical and Experimental Research*. 2006;18:June.
- (437) Landi F, Zuccala G, Gambassi G et al. Body mass index and mortality among older people living in the community. *J Am Geriatr Soc*. 1999;47:1072-1076.
- (438) Labounty TM, Gomez MJ, Achenbach S et al. Body mass index and the prevalence, severity, and risk of coronary artery disease: an international multicentre study of 13,874 patients. *Eur Heart J Cardiovasc Imaging*. 2013;14:456-463.
- (439) Martinez SC, Byku M, Novak EL et al. Increased Body Mass Index Is Associated with Congestive Heart Failure and Mortality in Adult Fontan Patients. *Congenit Heart Dis*. 2015;doi: 10.1111/chd.12296. [Epub ahead of print].
- (440) Hansel B, Roussel R, Elbez Y et al. Cardiovascular risk in relation to body mass index and use of evidence-based preventive medications in patients with or at risk of atherothrombosis. *Eur Heart J*. 2015;36:2716-2728.
- (441) Johnson AP, Parlow JL, Whitehead M, Xu J, Rohland S, Milne B. Body Mass Index, Outcomes, and Mortality Following Cardiac Surgery in Ontario, Canada. *J Am Heart Assoc*. 2015;4:e002140.
- (442) Wang HJ, Si QJ, Shan ZL et al. Effects of body mass index on risks for ischemic stroke, thromboembolism, and mortality in Chinese atrial fibrillation patients: a single-center experience. *PLoS One*. 2015;10:e0123516.
- (443) Ardestani A, Hoffman HJ, Cooper HA. Obesity and outcomes among patients with established atrial fibrillation. *American Journal of Cardiology*. 2010;106:369-373.
- (444) Jang H, Kim JH, Choi SH et al. Body Mass Index and Mortality Rate in Korean Patients with Alzheimer's Disease. *J Alzheimers Dis*. 2015;46:399-406.
- (445) Hoit BD, Gilpin EA, Maisel AA, Henning H, Carlisle J, Ross J. Influence of obesity on morbidity and mortality after acute myocardial infarction. *American Heart Journal*. 1987;114:1334-1341.
- (446) Borgeraas H, Hertel JK, Svingen GF et al. Association of body mass index with risk of acute myocardial infarction and mortality in Norwegian male and female patients with suspected stable angina pectoris: a prospective cohort study. *BMC Cardiovasc Disord*. 2014;14:68.
- (447) Bellia V, Pedone C, Catalano F et al. Asthma in the elderly: mortality rate and associated risk factors for mortality. *Chest*. 2007;132:1175-1182.
- (448) Volkov VA, Ronis IV, Grunberg AA, Goncharov VL. Risk factors and mortality among female Riga population. An autopsy study. *Zentralbl Allg Pathol*. 1989;135:561-564.

- (449) Xiao H, Tan F, Huang Y et al. Impact of body mass index on prognosis for breast cancer patients. *Value in Health Conference: ISPOR 18th Annual International Meeting New Orleans, LA United States*. 2013;16:A130.
- (450) Bergom C, Kelly T, Bedi M et al. Does size matter: Examining the association of BMI with breast cancer recurrence and survival in an early stage breast cancer cohort with a high median BMI. *International Journal of Radiation Oncology Biology Physics Conference: 56th Annual Meeting of the American Society for Radiation Oncology, ASTRO 2014 San Francisco, CA United States*. 2014;90:S47-S48.
- (451) Cihan YB. Relationship of body mass index with prognosis in breast cancer patients treated with adjuvant radiotherapy and chemotherapy. *Asian Pacific journal of cancer prevention*. 2014;15:4233-4238.
- (452) Martin B, Southern DA, Lewin AM, Galbraith PD, Norris CM, Knudtson ML. The association between obesity and mortality in coronary artery disease patients is a time-dependent phenomenon. *Canadian Journal of Cardiology*. 2012;Conference:September-October.
- (453) Reichle K, Peter RS, Concini H, Nagel G. Associations of pre-diagnostic body mass index with overall and cancer-specific mortality in a large Austrian cohort. *Cancer Causes Control*. 2015;26:1643-1652.
- (454) Cantarutti A, Bonn SE, Adami HO, Gronberg H, Bellocco R, Balter K. Body mass index and mortality in men with prostate cancer. *Prostate*. 2015;75:1129-1136.
- (455) Geri G, Savary G, Legriel S et al. Impact of obesity on prognosis after successfully resuscitated cardiac arrest: A bicentric retrospective study. *Intensive Care Medicine Conference: 27th Annual Congress of the European Society of Intensive Care Medicine, ESICM 2014 Barcelona Spain*. 2014;40:S214-S215.
- (456) Coutinho T, Goel K, Correa De SD et al. Combining body mass index with measures of central obesity in the assessment of mortality in subjects with coronary disease: Role of "normal weight central obesity". *Journal of the American College of Cardiology*. 2013;61:05.
- (457) Sharma A, Vallakati A, Einstein AJ et al. Relationship of body mass index with total mortality, cardiovascular mortality, and myocardial infarction after coronary revascularization: evidence from a meta-analysis. *Mayo Clin Proc*. 2014;89:1080-1100.
- (458) De Schutter A, Lavie CJ, Kachur S, Patel DA, Milani RV. Body composition and mortality in a large cohort with preserved ejection fraction: untangling the obesity paradox. *Mayo Clin Proc*. 2014;89:1072-1079.
- (459) Herrmann J, Gersh BJ, Goldfinger JZ et al. Body mass index and acute and long-term outcomes after acute myocardial infarction (from the Harmonizing Outcomes With Revascularization and Stents in Acute Myocardial Infarction Trial). *Am J Cardiol*. 2014;114:9-16.
- (460) Witassek F, Schwenkglenks M, Erne P, Radovanovic D. Impact of Body Mass Index on mortality in Swiss hospital patients with ST-elevation myocardial infarction: does an obesity paradox exist? *Swiss Medical Weekly*. 2014;144:13986.
- (461) Ahmed B, Davis HT, Laskey WK. In-hospital mortality among patients with type 2 diabetes mellitus and acute myocardial infarction: Results from the national inpatient sample, 2000-2010. *Journal of the American Heart Association*. 2014;3:e001090.
- (462) Ding D, Wang M, Su D et al. Body Mass Index, High-Sensitivity C-Reactive Protein and Mortality in Chinese with Coronary Artery Disease. *PLoS One*. 2015;10:e0135713.

- (463) Sobiczewski W, Wirtwein M, Jarosz D, Gruchala M. Superiority of waist circumference and body mass index in cardiovascular risk assessment in hypertensive patients with coronary heart disease. *Blood Press*. 2015;24:90-95.
- (464) Ariza-Sole A, Salazar-Mendiguchia J, Lorente V et al. Body mass index and acute coronary syndromes: paradox or confusion? *Eur Heart J Acute Cardiovasc Care*. 2015;4:158-164.
- (465) Colombo MG, Meisinger C, Amann U et al. Association of obesity and long-term mortality in patients with acute myocardial infarction with and without diabetes mellitus: Results from the MONICA/KORA myocardial infarction registry. *Cardiovascular Diabetology*. 2015;14:24.
- (466) Karrowni W, Kennedy K, Jones P et al. Obesity paradox among survivors of acute myocardial infarction and its interaction with time. *Journal of the American College of Cardiology Conference: 64th Annual Scientific Session of the American College of Cardiology and i2 Summit: Innovation in Intervention, ACC 15 San Diego, CA United States Conference Start*. 2015;65:A31.
- (467) Ding D, Wang M, Su D et al. Body mass index, C-reactive protein and mortality among coronary artery disease patients. *Circulation Conference: American Heart Association's Epidemiology and Prevention/Lifestyle and Cardiometabolic Health*. 2015;10.
- (468) Rockx MAJ, Fox SA, Stitt LW et al. Is obesity a predictor of mortality, morbidity and readmission after cardiac surgery? *Canadian Journal of Surgery*. 2004;47:34-38.
- (469) Poludasu S, Cavusoglu E, Khan W, Marmur JD. Impact of body mass index on long-term all-cause mortality after percutaneous coronary intervention in African-Americans. *Journal of Invasive Cardiology*. 2009;21:20-25.
- (470) Benderly M, Boyko V, Goldbourt U. Relation of body mass index to mortality among men with coronary heart disease. *American Journal of Cardiology*. 2010;106:297-304.
- (471) Van Straten AHM, Bramer S, Soliman Hamad MA et al. Effect of Body Mass Index on Early and Late Mortality After Coronary Artery Bypass Grafting. *Annals of Thoracic Surgery*. 2010;89:January.
- (472) Buchholz EM, Rathore SS, Reid KJ, Spertus JA, Krumholz HM. Association of body mass index and mortality after acute myocardial infarction. *Journal of the American College of Cardiology*. 2010;Conference:09.
- (473) Jain R, Nallamothu BK, Chan PS. Body mass index and survival after in-hospital cardiac arrest. *Circulation: Cardiovascular Quality and Outcomes*. 2010;3:September.
- (474) Das SR, Alexander KP, Chen AY et al. Impact of body weight and extreme obesity on the presentation, treatment, and in-hospital outcomes of 50,149 patients with ST-segment elevation myocardial infarction: Results from the NCDR (National Cardiovascular Data Registry). *Journal of the American College of Cardiology*. 2011;58:December-20.
- (475) Martin B-J, De KL, Southern DA et al. The association between adiposity and mortality in patients with coronary artery disease is modified by time. *Circulation*. 2012;Conference:20.
- (476) Shah S, Hartmann N, Cohen M, Florez H, Palacio A, Leonardo T. Obesity is associated with lower mortality following acute coronary syndromes: A meta-analysis. *Journal of the American College of Cardiology*. 2013;Conference:12.
- (477) Sharma S, Batsis J, Somers V et al. Normal weight-central obesity is associated with the highest mortality risk in older adults with coronary artery disease. *Journal of the American College of Cardiology*. 2014;Conference:01.
- (478) Niedziela J, Hudzik B, Niedziela N et al. The obesity paradox in acute coronary syndrome: a meta-analysis. *Eur J Epidemiol*. 2014;29:801-812.

- (479) Wang ZJ, Zhou YJ, Galper BZ, Gao F, Yeh RW, Mauri L. Association of body mass index with mortality and cardiovascular events for patients with coronary artery disease: a systematic review and meta-analysis. *Heart*. 2015.
- (480) Mohebi R, Simforoosh A, Tohidi M, Azizi F, Hadaegh F. Obesity Paradox and Risk of Mortality Events in Chronic Kidney Disease Patients: A Decade of Follow-up in Tehran Lipid and Glucose Study. *J Ren Nutr*. 2015;25:345-350.
- (481) Keller HH, Ostbye T. Do nutrition indicators predict death in elderly Canadians with cognitive impairment? *Can J Public Health*. 2000;91:220-224.
- (482) Jordan JG, Jr., Mann JR. Obesity and mortality in persons with obstructive lung disease using data from the NHANES III. *South Med J*. 2010;103:323-330.
- (483) Robinson MK, Mogensen KM, Casey JD et al. The relationship among obesity, nutritional status, and mortality in the critically ill. *Crit Care Med*. 2015;43:87-100.
- (484) Dagenais GR, Yi Q, Mann JFE, Bosch J, Pogue J, Yusuf S. Prognostic impact of body weight and abdominal obesity in women and men with cardiovascular disease. *American Heart Journal*. 2005;149:January.
- (485) van der LJ, van der GY, Nathoe HM, de Borst GJ, Kappelle LJ, Visseren FL. The separate and combined effects of adiposity and cardiometabolic dysfunction on the risk of recurrent cardiovascular events and mortality in patients with manifest vascular disease. *Heart*. 2014;100:1421-1429.
- (486) Widlansky ME, Sesso HD, Rexrode KM, Manson JE, Gaziano JM. Body mass index and total and cardiovascular mortality in men with a history of cardiovascular disease. *Arch Intern Med*. 2004;164:2326-2332.
- (487) Sharma A, Lichstein E, Chatterjee S. Body mass index as predictor of total and cardiac mortality in patients with cardiovascular disease: A meta analysis of 49 studies. *Cardiology (Switzerland) Conference: International Academy of Cardiology 18th World Congress on Heart Disease Annual Scientific Sessions 2013 Vancouver, BC Canada*. 2013;125:344.
- (488) Menke A, Casagrande SS, Cowie CC. The relationship of adiposity and mortality among people with diabetes in the US general population: a prospective cohort study. *BMJ Open*. 2014;4:e005671.
- (489) Zhao W, Katzmarzyk PT, Horswell R et al. Body mass index and the risk of all-cause mortality among patients with type 2 diabetes mellitus. *Circulation*. 2014;130:2143-2151.
- (490) Murphy RA, Reinders I, Garcia ME et al. Adipose tissue, muscle, and function: potential mediators of associations between body weight and mortality in older adults with type 2 diabetes. *Diabetes Care*. 2014;37:3213-3219.
- (491) Tanaka S, Tanaka S, Imuro S et al. Body mass index and mortality among Japanese patients with type 2 diabetes: pooled analysis of the Japan diabetes complications study and the Japanese elderly diabetes intervention trial. *J Clin Endocrinol Metab*. 2014;99:E2692-E2696.
- (492) Bozorgmanesh M, Arshi B, Sheikholeslami F, Azizi F, Hadaegh F. No Obesity Paradox-BMI Incapable of Adequately Capturing the Relation of Obesity with All-Cause Mortality: An Inception Diabetes Cohort Study. *Int J Endocrinol*. 2014;2014:282089.
- (493) Kubota Y, Iso H, Tamakoshi A. Association of Body Mass Index and Mortality in Japanese Diabetic Men and Women Based on Self-Reports: The Japan Collaborative Cohort (JACC) Study. *J Epidemiol*. 2015;25:553-558.
- (494) Raffield LM, Hsu FC, Cox AJ, Carr JJ, Freedman BI, Bowden DW. Predictors of all-cause and cardiovascular disease mortality in type 2 diabetes: Diabetes Heart Study. *Diabetol Metab Syndr*. 2015;7:58.

- (495) Costanzo P, Cleland JG, Pellicori P et al. The obesity paradox in type 2 diabetes mellitus: relationship of body mass index to prognosis: a cohort study. *Ann Intern Med.* 2015;162:610-618.
- (496) Lim RB, Chen C, Naidoo N et al. Anthropometrics indices of obesity, and all-cause and cardiovascular disease-related mortality, in an Asian cohort with type 2 diabetes mellitus. *Diabetes Metab.* 2015;41:291-300.
- (497) Goodkin G. Mortality factors in diabetes. A 20 year mortality study. *J Occup Med.* 1975;17:716-721.
- (498) Rosengren A, Welin L, Tsipogianni A, Wilhelmsen L. Impact of cardiovascular risk factors on coronary heart disease and mortality among middle aged diabetic men: a general population study. *BMJ.* 1989;299:1127-1131.
- (499) Ford ES, DeStefano F. Risk factors for mortality from all causes and from coronary heart disease among persons with diabetes. Findings from the National Health and Nutrition Examination Survey I Epidemiologic Follow-up Study. *Am J Epidemiol.* 1991;133:1220-1230.
- (500) Walters DP, Gatling W, Houston AC, Mullee MA, Julious SA, Hill RD. Mortality in diabetic subjects: an eleven-year follow-up of a community-based population. *Diabet Med.* 1994;11:968-973.
- (501) Chaturvedi N, Stevens LK, Fuller JH. Mortality and morbidity associated with body weight in people with IDDM. The WHO Multinational Study of Vascular Disease in Diabetes. *Diabetes Care.* 1995;18:761-765.
- (502) Chaturvedi N, Fuller JH. Mortality risk by body weight and weight change in people with NIDDM. The WHO Multinational Study of Vascular Disease in Diabetes. *Diabetes Care.* 1995;18:766-774.
- (503) Zoppini G, Verlato G, Leuzinger C et al. Body mass index and the risk of mortality in type II diabetic patients from Verona. *Int J Obes Relat Metab Disord.* 2003;27:281-285.
- (504) Hillier TA, Rizzo JH, Pedula KL et al. Increased mortality associated with the metabolic syndrome in older women with diabetes. *Diabetes Care.* 2005;28:2258-2260.
- (505) Hu G, Jousilahti P, Barengo NC, Qiao Q, Lakka TA, Tuomilehto J. Physical activity, cardiovascular risk factors, and mortality among Finnish adults with diabetes. *Diabetes Care.* 2005;28:799-805.
- (506) McAuley PA, Myers JN, Abella JP, Tan SY, Froelicher VF. Exercise capacity and body mass as predictors of mortality among male veterans with type 2 diabetes. *Diabetes Care.* 2007;30:1539-1543.
- (507) Haglin L, Tornkvist B, Backman L. Prediction of all-cause mortality in a patient population with hypertension and type 2 DM by using traditional risk factors and serum-phosphate,-calcium and-magnesium. *Acta Diabetol.* 2007;44:138-143.
- (508) McEwen LN, Kim C, Karter AJ et al. Risk factors for mortality among patients with diabetes: the Translating Research Into Action for Diabetes (TRIAD) Study. *Diabetes Care.* 2007;30:1736-1741.
- (509) Yang X, So WY, Tong PC et al. Development and validation of an all-cause mortality risk score in type 2 diabetes. *Arch Intern Med.* 2008;168:451-457.
- (510) So WY, Yang X, Ma RC et al. Risk factors in V-shaped risk associations with all-cause mortality in type 2 diabetes-The Hong Kong Diabetes Registry. *Diabetes Metab Res Rev.* 2008;24:238-246.
- (511) Weiss A, Boaz M, Beloosesky Y, Kornowski R, Grossman E. Body mass index and risk of all-cause and cardiovascular mortality in hospitalized elderly patients with diabetes mellitus. *Diabet Med.* 2009;26:253-259.

- (512) Khalangot M, Tronko M, Kravchenko V, Kulchinska J, Hu G. Body mass index and the risk of total and cardiovascular mortality among patients with type 2 diabetes: a large prospective study in Ukraine. *Heart*. 2009;95:454-460.
- (513) Eeg-Olofsson K, Cederholm J, Nilsson PM et al. Risk of cardiovascular disease and mortality in overweight and obese patients with type 2 diabetes: an observational study in 13,087 patients. *Diabetologia*. 2009;52:65-73.
- (514) Sluik D, Boeing H, Montonen J et al. Associations between general and abdominal adiposity and mortality in individuals with diabetes mellitus. *Am J Epidemiol*. 2011;174:22-34.
- (515) Carnethon MR, De Chavez PJ, Biggs ML et al. Association of weight status with mortality in adults with incident diabetes. *JAMA*. 2012;308:581-590.
- (516) Kokkinos P, Myers J, Faselis C, Doumas M, Kheirbek R, Nysten E. BMI-mortality paradox and fitness in African American and Caucasian men with type 2 diabetes. *Diabetes Care*. 2012;35:1021-1027.
- (517) Doehner W, Erdmann E, Cairns R et al. Inverse relation of body weight and weight change with mortality and morbidity in patients with type 2 diabetes and cardiovascular co-morbidity: an analysis of the PROactive study population. *Int J Cardiol*. 2012;162:20-26.
- (518) McEwen LN, Karter AJ, Waitzfelder BE et al. Predictors of mortality over 8 years in type 2 diabetic patients: Translating Research Into Action for Diabetes (TRIAD). *Diabetes Care*. 2012;35:1301-1309.
- (519) Perotto M, Panero F, Gruden G et al. Obesity is associated with lower mortality risk in elderly diabetic subjects: the Casale Monferrato study. *Acta Diabetol*. 2013;50:563-568.
- (520) Di PR, Marucci A, Fontana A et al. Role of obesity on all-cause mortality in whites with type 2 diabetes from Italy. *Acta Diabetol*. 2013;50:971-976.
- (521) Katzmarzyk PT, Hu G, Cefalu WT, Mire E, Bouchard C. The importance of waist circumference and BMI for mortality risk in diabetic adults. *Diabetes Care*. 2013;36:3128-3130.
- (522) Mueller NT, Odegaard AO, Koh W-P, Gross MD, Yuan J-M, Pereira MA. Body mass index and mortality in chinese adults with newly diagnosed type 2 diabetes. *Circulation Conference: American Heart Association's Epidemiology and Prevention/Physical Activity, Nutrition and Metabolism 2013 Scientific Sessions New Orleans, LA United States*. 2013;127:MP82.
- (523) Tobias DK, Pan A, Ding E et al. Body mass index and mortality among adults with incident type diabetes: Results from two prospective us cohort studies. *Circulation Conference: American Heart Association's Epidemiology and Prevention/Physical Activity, Nutrition and Metabolism 2013 Scientific Sessions New Orleans, LA United States*. 2013;127:MP61.
- (524) Tobias DK, Pan A, Jackson CL et al. Body-mass index and mortality among adults with incident type 2 diabetes. *N Engl J Med*. 2014;370:233-244.
- (525) Kuo JF, Hsieh YT, Mao IC, Lin SD, Tu ST, Hsieh MC. The Association Between Body Mass Index and All-Cause Mortality in Patients With Type 2 Diabetes Mellitus: A 5.5-Year Prospective Analysis. *Medicine (Baltimore)*. 2015;94:e1398.
- (526) Liu XM, Liu YJ, Zhan J, He QQ. Overweight, obesity and risk of all-cause and cardiovascular mortality in patients with type 2 diabetes mellitus: a dose-response meta-analysis of prospective cohort studies. *Eur J Epidemiol*. 2015;30:35-45.
- (527) Lu JL, Kalantar-Zadeh K, Ma JZ, Quarles LD, Kovesdy CP. Association of body mass index with outcomes in patients with CKD. *Journal of the American Society of Nephrology : JASN*. 2014;25:2088-2096.



- (528) Drumond Andrade FC, Mohd Nazan AI, Lebrao ML, de Oliveira Duarte YA. The impact of body mass index and weight changes on disability transitions and mortality in Brazilian older adults. *J Aging Res.* 2013;2013:905094.
- (529) Lin WP, Wen CJ, Jiang CC, Hou SM, Chen CY, Lin J. Risk factors for hip fracture sites and mortality in older adults. *J Trauma.* 2011;71:191-197.
- (530) Payette H, Coulombe C, Boutier V, Gray-Donald K. Weight loss and mortality among free-living frail elders: a prospective study. *J Gerontol A Biol Sci Med Sci.* 1999;54:M440-M445.
- (531) Chan TC, Luk JK, Chu LW, Chan FH. Association between body mass index and cause-specific mortality as well as hospitalization in frail Chinese older adults. *Geriatr Gerontol Int.* 2015;15:72-79.
- (532) Flodin L, Svensson S, Cederholm T. Body mass index as a predictor of 1 year mortality in geriatric patients. *Clin Nutr.* 2000;19:121-125.
- (533) Weiss A, Beloosesky Y, Boaz M, Yalov A, Kornowski R, Grossman E. Body mass index is inversely related to mortality in elderly subjects. *J Gen Intern Med.* 2008;23:19-24.
- (534) Ravi Y, Whitson BA, Emani S et al. Body mass index impacts immediate and long-term survival of heart transplant recipients. *Journal of Heart and Lung Transplantation Conference: 33rd Annual Meeting and Scientific Sessions of the International Society for Heart and Lung Transplantation, ISHLT 2013 Montreal, QC Canada.* 2013;32:S39.
- (535) Kiran VR, Zhu TY, Yip T, Lui SL, Lo WK. Body mass index and mortality risk in Asian peritoneal dialysis patients in Hong Kong-impact of diabetes and cardiovascular disease status. *Peritoneal Dialysis International.* 2014;34:390-398.
- (536) Li T, Liu J, An S, Dai Y, Yu Q. Body mass index and mortality in patients on maintenance hemodialysis: A meta-analysis. *International Urology and Nephrology.* 2014;46:623-631.
- (537) Feingold E, Adams J, Penprase B, Tubie B. Effect of body mass index and albumin on mortality rates for adult African-American hemodialysis patients. *J Am Assoc Nurse Pract.* 2015;27:637-645.
- (538) Gupta PP, Fonarow GC, Horwich TB. Obesity and the obesity paradox in heart failure. *The Canadian journal of cardiology.* 195;31:195-202.
- (539) Testa G, Cacciatore F, Galizia G et al. Waist circumference but not body mass index predicts long-term mortality in elderly subjects with chronic heart failure. *Journal of the American Geriatrics Society.* 2010;58:1433-1440.
- (540) Khalid U, Ather S, Bavishi C et al. Pre-morbid body mass index and mortality after incident heart failure: the ARIC Study. *J Am Coll Cardiol.* 2014;64:2743-2749.
- (541) Takiguchi M, Yoshihisa A, Miura S et al. Impact of body mass index on mortality in heart failure patients. *Eur J Clin Invest.* 2014;44:1197-1205.
- (542) Puig T, Ferrero-Gregori A, Roig E et al. Prognostic value of body mass index and waist circumference in patients with chronic heart failure (Spanish REDINSCOR Registry). *Rev Esp Cardiol (Engl Ed).* 2014;67:101-106.
- (543) Shah R, Gayat E, Januzzi JL et al. Body mass index and mortality in acutely decompensated heart failure across the world: A global obesity paradox. *Journal of the American College of Cardiology.* 2014;63:778-785.
- (544) Sharma A, Lavie CJ, Borer JS et al. Meta-analysis of the relation of body mass index to all-cause and cardiovascular mortality and hospitalization in patients with chronic heart failure. *Am J Cardiol.* 2015;115:1428-1434.

- (545) Littnerova S, Parenica J, Spinar J et al. Positive influence of being overweight/obese on long term survival in patients hospitalised due to acute heart failure. *PLoS One*. 2015;10:e0117142.
- (546) Pinho EM, Lourenco P, Silva S et al. Higher BMI in heart failure patients is associated with longer survival only in the absence of diabetes. *J Cardiovasc Med (Hagerstown)*. 2015;16:576-582.
- (547) Aranda RM, Puerto JL, Andrey JL et al. Fluctuations of the anthropometric indices and mortality of patients with incident heart failure: A prospective study in the community. *International Journal of Clinical Practice*. 2015;69:169-179.
- (548) Curtis JP, Selter JG, Wang Y et al. The obesity paradox: Body mass index and outcomes in patients with heart failure. *Archives of Internal Medicine*. 2005;165:55-61.
- (549) Fonarow GC, Srikanthan P, Costanzo MR, Cintron GB, Lopatin M. An obesity paradox in acute heart failure: Analysis of body mass index and inhospital mortality for 108 927 patients in the Acute Decompensated Heart Failure National Registry. *American Heart Journal*. 2007;153:74-81.
- (550) Oreopoulos A, Padwal R, Kalantar-Zadeh K, Fonarow GC, Norris CM, Mcalister FA. Body mass index and mortality in heart failure: A meta-analysis. *American Heart Journal*. 2008;156:13-22.
- (551) Hamaguchi S, Tsuchihashi-Makaya M, Kinugawa S et al. Body mass index is an independent predictor of long term outcomes in patients hospitalized with heart failure in Japan - A report from the Japanese cardiac registry of heart failure in cardiology (JCARE-CARD). *Circulation Journal*. 2010;74:2605-2611.
- (552) Zamora E, Lupon J, Urrutia A et al. Obesity and heart failure: the paradox continues in the long-term follow-up. *European Journal of Heart Failure, Supplement Conference: Heart Failure 2010 Congress Berlin Germany*. 2010;9:S124.
- (553) Clark AL, Fonarow GC, Horwich TB. Waist circumference, body mass index, and survival in systolic heart failure: The obesity paradox revisited. *Journal of Cardiac Failure*. 2011;17:374-380.
- (554) Gastelurrutia P, Pascual-Figal D, Vazquez R et al. Obesity paradox and risk of sudden death in heart failure: Results from the MUerte Subita en Insuficiencia Cardiaca (MUSIC) Study. *American Heart Journal*. 2011;161:158-164.
- (555) Parissis J, Fountoulaki K, Mebazaa A et al. Body mass index and in-hospital mortality in acute heart failure patients. *Circulation Conference: American Heart Association 2012 Scientific Sessions and Resuscitation Science Symposium Los Angeles, CA United States*. 2012;126:Abstract 12495.
- (556) Trullas JC, Formiga F, Montero M et al. Impact of weight loss on mortality in chronic heart failure: Findings from the RICA Registry. *International Journal of Cardiology*. 2013;168:306-311.
- (557) Sharma A, Lavie CJ, Borer JS et al. Relationship of body mass index with total mortality, cardiac mortality and risk of hospitalization in patients with chronic heart failure. *Circulation Conference: American Heart Association's Epidemiology and Prevention/Lifestyle and Cardiometabolic Health 2015 Scientific Sessions Baltimore, MD United States*. 2015;131:P383.
- (558) Thornqvist C, Gislason GH, Kober L, Jensen PF, Torp-Pedersen C, Andersson C. Body mass index and risk of perioperative cardiovascular adverse events and mortality in 34,744 Danish patients undergoing hip or knee replacement. *Acta Orthop*. 2014;85:456-462.
- (559) Baum MK, Campa A, Martinez S et al. Metabolic and life style risk factors and all-cause mortality in the Miami adult studies in HIV (MASH) cohort. *Circulation*

*Conference: American Heart Association's Epidemiology and Prevention/Lifestyle and Cardiometabolic Health 2015 Scientific Sessions Baltimore, MD United States.* 2015;131:P231.

- (560) Landi F, Onder G, Gambassi G, Pedone C, Carbonin P, Bernabei R. Body mass index and mortality among hospitalized patients. *Arch Intern Med.* 2000;160:2641-2644.
- (561) Teno JM, Harrell FE, Jr., Knaus W et al. Prediction of survival for older hospitalized patients: the HELP survival model. Hospitalized Elderly Longitudinal Project. *J Am Geriatr Soc.* 2000;48:S16-S24.
- (562) Zekry D, Herrmann FR, Vischer UM. The association between the body mass index and 4-year all-cause mortality in older hospitalized patients. *The journals of gerontology.* 2013;68:705-711.
- (563) Lang PO, Mahmoudi R, Novella JL et al. Is obesity a marker of robustness in vulnerable hospitalized aged populations? Prospective, multicenter cohort study of 1 306 acutely ill patients. *J Nutr Health Aging.* 2014;18:66-74.
- (564) McAuley PA, Sui X, Church TS, Hardin JW, Myers JN, Blair SN. The joint effects of cardiorespiratory fitness and adiposity on mortality risk in men with hypertension. *Am J Hypertens.* 2009;22:1062-1069.
- (565) Wang Y, Wang Y, Qain Y et al. Association of body mass index with cause specific deaths in Chinese elderly hypertensive patients: Minhang community study. *PLoS One.* 2013;8:e71223.
- (566) Shah RV, Abbasi SA, Yamal JM et al. Impaired fasting glucose and body mass index as determinants of mortality in ALLHAT: is the obesity paradox real? *J Clin Hypertens (Greenwich).* 2014;16:451-458.
- (567) Wang S, Majumdar SR, Padwal R. BMI, annual blood pressure measurements, and mortality in patients with obesity and hypertension: a retrospective cohort study. *Blood Press Monit.* 2015;20:32-38.
- (568) Xu W, Shubina M, Goldberg SI, Turchin A. Body mass index and all-cause mortality in patients with hypertension. *Obesity (Silver Spring).* 2015;23:1712-1720.
- (569) Huynh QL, Reid CM, Chowdhury EK et al. Prediction of cardiovascular and all-cause mortality at 10 years in the hypertensive aged population. *American Journal of Hypertension.* 2015;28:649-656.
- (570) Abhyankar S, Leishear K, Callaghan FM, mner-Fushman D, McDonald CJ. Lower short- and long-term mortality associated with overweight and obesity in a large cohort study of adult intensive care unit patients. *Critical Care.* 2012;16:R235.
- (571) Sasabuchi Y, Yasunaga H, Matsui H et al. The Dose-Response Relationship Between Body Mass Index and Mortality in Subjects Admitted to the ICU With and Without Mechanical Ventilation. *Respir Care.* 2015;60:983-991.
- (572) Lim SY, Choi WI, Jeon K et al. Body mass index and mortality in korean intensive care units: a prospective multicenter cohort study. *PLoS One.* 2014;9:e90039.
- (573) Jean RE, Mangulabnan V, Sandhu G. Impact of body mass index on survival in critically ill: A retrospective analysis. *American Journal of Respiratory and Critical Care Medicine Conference: American Thoracic Society International Conference, ATS 2013 Philadelphia, PA United States.* 2013;187.
- (574) Allard JP, Aghdassi E, McArthur M et al. Nutrition risk factors for survival in the elderly living in Canadian long-term care facilities. *J Am Geriatr Soc.* 2004;52:59-65.
- (575) Cereda E, Pedrolli C, Zagami A et al. Body mass index and mortality in institutionalized elderly. *J Am Med Dir Assoc.* 2011;12:174-178.
- (576) Nakazawa A, Nakamura K, Kitamura K, Yoshizawa Y. Association between body mass index and mortality among institutionalized elderly adults in Japan. *Environ Health Prev Med.* 2013;18:502-506.

- (577) Akinnusi ME, Pineda LA, El Solh AA. Effect of obesity on intensive care morbidity and mortality: A meta-analysis. *Critical Care Medicine*. 2008;36:151-158.
- (578) Madero M, Sarnak MJ, Wang X et al. Body Mass Index and Mortality in CKD. *American Journal of Kidney Diseases*. 2007;50:404-411.
- (579) Ahmadi SF, Zahmatkesh G, Streja E et al. Body mass index and mortality in kidney transplant recipients: a systematic review and meta-analysis. *Am J Nephrol*. 2014;40:315-324.
- (580) Dick A, Healey P, Smith J, Hansen R, Montenovo M. Body mass index as a predictor of outcomes among pediatric kidney transplant recipients. *Pediatric Transplantation Conference: 8th Congress on Pediatric Transplantation, IPTA 2015 San Francisco, CA United States*. 2015;19:98.
- (581) Singer JP, Peterson ER, Snyder ME et al. Body composition and mortality after adult lung transplantation in the United States. *Am J Respir Crit Care Med*. 2014;190:1012-1021.
- (582) Latran M, Lane K, Shen C et al. Impact of age and BMI on survival in lung transplant recipients. *Journal of Heart and Lung Transplantation Conference: 35th Annual Meeting and Scientific Sessions of the International Society for Heart and Lung Transplantation, ISHLT 2015 Nice France*. 2015;34:S250-S251.
- (583) Small AG, Thwe LM, Byrne JA et al. Neuroblastoma, body mass index, and survival. *Medicine (United States)*. 2015;94:e713.
- (584) Volpato S, Romagnoni F, Soattin L et al. Body mass index, body cell mass, and 4-year all-cause mortality risk in older nursing home residents. *J Am Geriatr Soc*. 2004;52:886-891.
- (585) Grabowski DC, Campbell CM, Ellis JE. Obesity and mortality in elderly nursing home residents. *J Gerontol A Biol Sci Med Sci*. 2005;60:1184-1189.
- (586) Kimyagarov S, Klid R, Levenkrohn S et al. Body mass index (BMI), body composition and mortality of nursing home elderly residents. *Arch Gerontol Geriatr*. 2010;51:227-230.
- (587) Lin WY, Albu J, Liu CS et al. Larger body mass index and waist circumference are associated with lower mortality in Chinese long-term care facility residents. *J Am Geriatr Soc*. 2010;58:2092-2098.
- (588) Lee JS, Auyeung TW, Chau PP et al. Obesity Can Benefit Survival-A 9-Year Prospective Study in 1614 Chinese Nursing Home Residents. *J Am Med Dir Assoc*. 2014;15:342-348.
- (589) Wirth R, Streicher M, Smoliner C et al. The impact of weight loss and low BMI on mortality of nursing home residents - Results from the nutritionDay in nursing homes. *Clin Nutr*. 2015;doi: 10.1016/j.clnu.2015.06.003. [Epub ahead of print].
- (590) Lillamand M, Kelaiditi E, Demougeot L, Rolland Y, Vellas B, Cesari M. The Mini Nutritional Assessment-Short Form and mortality in nursing home residents--results from the INCUR study. *J Nutr Health Aging*. 2015;19:383-388.
- (591) Zanoria S, Wilcox D, Foley R, Datta D. Body Mass index (BMI) in pulmonary arterial hypertension (PAH) and its impact on survival. *American Journal of Respiratory and Critical Care Medicine Conference: American Thoracic Society International Conference, ATS 2013 Philadelphia, PA United States*. 2013;187.
- (592) Kasenda B, Bass A, Koeberle D et al. Survival in overweight patients with advanced pancreatic carcinoma: a multicentre cohort study. *BMC cancer*. 2014;14:728.
- (593) Utzolino S, Ditzel CM, Baier PK, Hopt UT, Kaffarnik MF. The obesity paradox in surgical intensive care patients with peritonitis. *J Crit Care*. 2014;29:887-5.
- (594) Nie W, Zhang Y, Jee SH, Jung KJ, Li B, Xiu Q. Obesity survival paradox in pneumonia: a meta-analysis. *BMC medicine*. 2014;12:61.

- (595) Golledge J, Cronin O, Iyer V, Bradshaw B, Moxon JV, Cunningham MA. Body mass index is inversely associated with mortality in patients with peripheral vascular disease. *Atherosclerosis*. 2013;229:549-555.
- (596) Hughes JD, Samarage M, Burrows AM, Lanzino G, Rabinstein AA. Body-Mass Index (BMI) and Aneurysmal Subarachnoid Hemorrhage: Decreasing Mortality with Increasing BMI. *World Neurosurg*. 2015;doi: 10.1016/j.wneu.2015.07.019. [Epub ahead of print].
- (597) Gaulton TG, Marshall MC, Mikkelsen ME et al. A retrospective cohort study examining the association between body mass index and mortality in severe sepsis. *Intern Emerg Med*. 2015;10:471-479.
- (598) Dehlendorff C, Andersen KK, Olsen TS. Body mass index and death by stroke: no obesity paradox. *JAMA Neurol*. 2014;71:978-984.
- (599) Barba R, Marco J, Ruiz J et al. The obesity paradox in stroke: impact on mortality and short-term readmission. *J Stroke Cerebrovasc Dis*. 2015;24:766-770.
- (600) Wohlfahrt P, Lopez-Jimenez F, Krajcoviechova A et al. The obesity paradox and survivors of ischemic stroke. *Journal of Stroke and Cerebrovascular Diseases*. 2015;24:1443-1450.
- (601) Olsen TS, Dehlendorff C, Petersen HG, Andersen KK. Body mass index and poststroke mortality. *Neuroepidemiology*. 2008;30:93-100.
- (602) Doehner W, Schenkel J, Springer J, Anker SD, Audebert H. The association of body mass index and presence of cachexia with survival and disability after stroke: Data from 1,521 hospitalised patients with 30 months follow-up. *Journal of Cachexia, Sarcopenia and Muscle Conference: 6th Cachexia Conference Milan Italy*. 2011;2:222-223.
- (603) Vemmos K, Ntaios G, Spengos K et al. Association between obesity and mortality after acute first-ever stroke: The obesity-stroke paradox. *Stroke*. 2011;42:30-36.
- (604) Gomes F, Crichton S, Wolfe C, Emery P, Weekes CE. The association between BMI and mortality after first-ever ischemic stroke. *Cerebrovascular Diseases Conference: 20th European Stroke Conference, ESC 2011 Hamburg Germany*. 2011;31:273.
- (605) Skolarus LE, Sanchez BN, Levine DA et al. Body mass index and mortality in acute ischemic stroke. *Annals of Neurology Conference: 137th Annual Meeting of the American Neurological Association Boston, MA United States*. 2012;72:S12-S13.
- (606) Doehner W, Schenkel J, Anker SD, Springer J, Audebert H. Overweight and obesity are associated with improved survival, functional outcome, and stroke recurrence after acute stroke or transient ischaemic attack: Observations from the tempis trial. *European Heart Journal*. 2013;34:268-277.
- (607) Skolarus LE, Sanchez BN, Levine DA et al. Association of body mass index and mortality after acute ischemic stroke. *Circ Cardiovasc Qual Outcomes*. 2014;7:64-69.
- (608) Javier Aparicio H, Himali J, Beiser A, Kase C, Wolf P, Seshadri S. Body weight and survival after stroke: Exploring the "obesity paradox" in the framingham study. *Neurology Conference: 67th American Academy of Neurology Annual Meeting, AAN*. 2015;84.
- (609) Wohlfahrt P, Lopez-Jimenez F, Krajcoviechova A et al. The obesity paradox and survivors of ischemic stroke. *European Journal of Preventive Cardiology Conference: EuroPrevent 2015 Lisbon Portugal*. 2015;22:S113.
- (610) Bagheri M, Speakman JR, Shabbidar S, Kazemi F, Djafarian K. A dose-response meta-analysis of the impact of body mass index on stroke and all-cause mortality in stroke patients: a paradox within a paradox. *Obes Rev*. 2015;16:416-423.

- (611) Valentijn TM, Hoeks SE, Bakker EJ et al. Body-mass index and late mortality in a general surgery population. *European Heart Journal Conference: European Society of Cardiology, ESC Congress 2011 Paris France*. 2011;32:714.
- (612) Turrentine FE, Hanks JB, Schirmer BD, Stukenborg GJ. The relationship between body mass index and 30-day mortality risk, by principal surgical procedure. *Archives of Surgery*. 2012;147:236-242.
- (613) Burger AJ, Han Y, Aronson D. The relationship between body mass index and mortality in patients with acute decompensated heart failure. *International Journal of Cardiology*. 2009;134:132-135.
- (614) Arguelles LM, Bertoni AG, Biggs ML et al. All-cause mortality in hypertensive normal weight adults. *Circulation Conference: American Heart Association's Epidemiology and Prevention/Physical Activity, Nutrition and Metabolism 2013 Scientific Sessions New Orleans, LA United States*. 2013;127:P320.
- (615) Gustafsson F, Kragelund CB, Torp-Pedersen C et al. Effect of obesity and being overweight on long-term mortality in congestive heart failure: Influence of left ventricular systolic function. *European Heart Journal*. 2005;26:58-64.
- (616) Horwich TB, Fonarow GC, Hamilton MA, MacLellan WR, Woo MA, Tillisch JH. The relationship between obesity and mortality in patients with heart failure. *Journal of the American College of Cardiology*. 2001;38:789-795.
- (617) Zampieri FG, Colombari F. Impact of body mass index, performance status, comorbidities and their interplay on the short term prognosis of medical admissions to the ICU. *Intensive Care Medicine Conference: 27th Annual Congress of the European Society of Intensive Care Medicine, ESICM 2014 Barcelona Spain*. 2014;40:S242.
- (618) Dvir D, Leipsic JA, Stub D et al. Influence of body-mass-index on survival of aortic stenosis patients treated by transcatheter aortic valve replacement: Insights on obesity-paradox from the PARTNER trial. *Journal of the American College of Cardiology Conference: 26th Annual Symposium Transcatheter Cardiovascular Therapeutics, TCT 2014 Washington, DC United States*. 2014;64:B203.
- (619) Yatabe T, Tamura T, Yamashita K, Yokoyama M. Potential association between lower body mass index and hospital mortality in critically ill Japanese patients. *Intensive Care Medicine Conference: 27th Annual Congress of the European Society of Intensive Care Medicine, ESICM 2014 Barcelona Spain*. 2014;40:S284.
- (620) Whitlock G, Lewington S, Sherliker P et al. Body-mass index and cause-specific mortality in 900 000 adults: collaborative analyses of 57 prospective studies. *Lancet*. 2009;373:1083-1096.
- (621) de Gonzalez AB, Hartge P, Cerhan JR et al. Body-mass index and mortality among 1.46 million white adults. *New England Journal of Medicine*. 2010;363:2211-2219.
- (622) Zheng W, McLerran DF, Rolland B et al. Association between body-mass index and risk of death in more than 1 million Asians. *N Engl J Med*. 2011;364:719-729.
- (623) Sasazuki S, Inoue M, Tsuji I et al. Body mass index and mortality from all causes and major causes in Japanese: results of a pooled analysis of 7 large-scale cohort studies. *J Epidemiol*. 2011;21:417-430.
- (624) Sugawara Y, Tsugane S, Inoue M et al. Body mass index and mortality from all causes and major causes in Japanese: Results of a Pooled analysis of 7 large-scale cohort studies. *Journal of Epidemiology*. 2011;21:417-430.
- (625) Song X, Pitkaniemi J, Gao W et al. Relationship between body mass index and mortality among Europeans. *Eur J Clin Nutr*. 2012;66:156-165.
- (626) Kitahara CM, Flint AJ, Berrington de GA et al. Association between class III obesity (BMI of 40-59 kg/m<sup>2</sup>) and mortality: a pooled analysis of 20 prospective studies. *PLoS Med*. 2014;11:e1001673.

- (627) Park Y, Wang S, Kitahara CM et al. Body mass index and risk of death in asian americans. *Am J Public Health*. 2014;104:520-525.
- (628) Cohen SS, Park Y, Signorello LB et al. A pooled analysis of body mass index and mortality among African Americans. *PLoS One*. 2014;9:e111980.
- (629) O'Doherty MG, Jorgensen T, Borglykke A et al. Repeated measures of body mass index and C-reactive protein in relation to all-cause mortality and cardiovascular disease: results from the consortium on health and ageing network of cohorts in Europe and the United States (CHANCES). *European Journal of Epidemiology*. 2014;29:887-897.
- (630) Zimmermann E, Angquist LH, Mirza SS et al. Is the adiposity-associated FTO gene variant related to all-cause mortality independent of adiposity? Meta-analysis of data from 169,551 Caucasian adults. *Obes Rev*. 2015;16:327-340.
- (631) Laara E, Rantakallio P. Body size and mortality in women: a 29 year follow up of 12,000 pregnant women in northern Finland. *J Epidemiol Community Health*. 1996;50:408-414.
- (632) Mongraw-Chaffin ML, Anderson CA, Clark JM, Bennett WL. Prepregnancy body mass index and cardiovascular disease mortality: The child health and development studies. *Obesity (Silver Spring)*. 2014;22:1149-1156.
- (633) Van Itallie TB. Obesity: adverse effects on health and longevity. *Am J Clin Nutr*. 1979;32:2723-2733.
- (634) Keys A. W. O. Atwater memorial lecture: overweight, obesity, coronary heart disease and mortality. *Nutr Rev*. 1980;38:297-307.
- (635) Keys A. Overweight, obesity, coronary heart disease, and mortality: the W.O. Atwater Memorial Lecture, 1980. *Prog Clin Biol Res*. 1981;67:31-46.
- (636) Johansson S, Vedin A, Wilhelmsson C. Myocardial infarction in women. *Epidemiol Rev*. 1983;5:67-95.
- (637) Stallones RA. Epidemiologic studies of obesity. *Ann Intern Med*. 1985;103:1003-1005.
- (638) Male pattern obesity as a risk predictor for coronary heart disease, stroke and death. *Nutr Rev*. 1985;43:44-46.
- (639) Kral JG. Morbid obesity and related health risks. *Ann Intern Med*. 1985;103:1043-1047.
- (640) Kluthe R, Schubert A. Obesity in Europe. *Ann Intern Med*. 1985;103:1037-1042.
- (641) Manson JE, Stampfer MJ, Hennekens CH, Willett WC. Body weight and longevity. A reassessment. *JAMA*. 1987;257:353-358.
- (642) Wilhelmsen L. Primary and secondary prevention. *J Hypertens Suppl*. 1987;5:S79-S82.
- (643) Stini WA. Body composition and longevity: is there a longevous morphotype? *Med Anthropol*. 1991;13:215-229.
- (644) Pi-Sunyer FX. Health implications of obesity. *Am J Clin Nutr*. 1991;53:1595S-1603S.
- (645) Kushner RF. Body weight and mortality. *Nutr Rev*. 1993;51:127-136.
- (646) Lissner L. Causes, diagnosis and risks of obesity. *Pharmacoeconomics*. 1994;5:8-17.
- (647) Seidell JC. The impact of obesity on health status: some implications for health care costs. *Int J Obes Relat Metab Disord*. 1995;19 Suppl 6:S13-S16.
- (648) Bray GA. Health hazards of obesity. *Endocrinol Metab Clin North Am*. 1996;25:907-919.
- (649) Solomon CG, Manson JE. Obesity and mortality: a review of the epidemiologic data. *Am J Clin Nutr*. 1997;66:1044S-1050S.
- (650) Colditz GA, Coakley E. Weight, weight gain, activity, and major illnesses: the Nurses' Health Study. *Int J Sports Med*. 1997;18 Suppl 3:S162-S170.

- (651) Kotz CM, Billington CJ, Levine AS. Obesity and aging. *Clin Geriatr Med*. 1999;15:391-412.
- (652) Seidell JC, Visscher TL. Body weight and weight change and their health implications for the elderly. *Eur J Clin Nutr*. 2000;54 Suppl 3:S33-S39.
- (653) Stevens J. Impact of age on associations between weight and mortality. *Nutr Rev*. 2000;58:129-137.
- (654) Stevens J. Obesity and mortality in African-Americans. *Nutr Rev*. 2000;58:346-353.
- (655) Sandowski SA. What is the ideal body weight? *Fam Pract*. 2000;17:348-351.
- (656) Visscher TL, Seidell JC. The public health impact of obesity. *Annu Rev Public Health*. 2001;22:355-375.
- (657) Stevens J, Nowicki EM. Body mass index and mortality in asian populations: implications for obesity cut-points. *Nutr Rev*. 2003;61:104-107.
- (658) Inelmen EM, Sergi G, Coin A, Miotto F, Peruzza S, Enzi G. Can obesity be a risk factor in elderly people? *Obes Rev*. 2003;4:147-155.
- (659) St-Onge MP, Heymsfield SB. Overweight and obesity status are linked to lower life expectancy. *Nutr Rev*. 2003;61:313-316.
- (660) Hu FB. Overweight and obesity in women: health risks and consequences. *J Womens Health (Larchmt)*. 2003;12:163-172.
- (661) Flegal KM, Williamson DF, Pamuk ER, Rosenberg HM. Estimating deaths attributable to obesity in the United States. *Am J Public Health*. 2004;94:1486-1489.
- (662) Flegal KM. Epidemiologic aspects of overweight and obesity in the United States. *Physiol Behav*. 2005;86:599-602.
- (663) Pitner JK. Obesity in the elderly. *Consult Pharm*. 2005;20:498-513.
- (664) Romero-Corral A, Montori VM, Somers VK et al. Association of bodyweight with total mortality and with cardiovascular events in coronary artery disease: a systematic review of cohort studies. *Lancet*. 2006;368:19.
- (665) Manson JE, Bassuk SS, Hu FB, Stampfer MJ, Colditz GA, Willett WC. Estimating the number of deaths due to obesity: can the divergent findings be reconciled? *J Womens Health (Larchmt)*. 2007;16:168-176.
- (666) Allender S, Rayner M. The burden of overweight and obesity-related ill health in the UK. *Obes Rev*. 2007;8:467-473.
- (667) Adami F, Vasconcelos FA. Childhood and adolescent obesity and adult mortality: a systematic review of cohort studies. *Cad Saude Publica*. 2008;24 Suppl 4:s558-s568.
- (668) Bales CW, Buhr G. Is obesity bad for older persons? A systematic review of the pros and cons of weight reduction in later life. *J Am Med Dir Assoc*. 2008;9:302-312.
- (669) Lewis CE, McTigue KM, Burke LE et al. Mortality, health outcomes, and body mass index in the overweight range: a science advisory from the American Heart Association. *Circulation*. 2009;119:3263-3271.
- (670) Pi-Sunyer X. The medical risks of obesity. *Postgrad Med*. 2009;121:21-33.
- (671) Lenz M, Richter T, Muhlhauser I. The morbidity and mortality associated with overweight and obesity in adulthood: a systematic review. *Dtsch Arztebl Int*. 2009;106:641-648.
- (672) Kar SS, Haldar P. Body-mass index as a robust predictor of mortality in Asian Indians. *Natl Med J India*. 2010;23:28-29.
- (673) Teucher B, Rohrmann S, Kaaks R. Obesity: focus on all-cause mortality and cancer. *Maturitas*. 2010;65:112-116.
- (674) Fogelholm M. Physical activity, fitness and fatness: relations to mortality, morbidity and disease risk factors. A systematic review. *Obes Rev*. 2010;11:202-221.
- (675) Seidell JC. Waist circumference and waist/hip ratio in relation to all-cause mortality, cancer and sleep apnea. *Eur J Clin Nutr*. 2010;64:35-41.



- (676) Cepeda-Valery B, Pressman GS, Figueredo VM, Romero-Corral A. Impact of obesity on total and cardiovascular mortality--fat or fiction? *Nat Rev Cardiol*. 2011;8:233-237.
- (677) Jakicic JM, Mishler AE, Rogers R. Fitness, Fatness, and Cardiovascular Disease Risk and Outcomes. *Current Cardiovascular Risk Reports*. 2011;5:113-119.
- (678) Donini LM, Savina C, Gennaro E et al. A systematic review of the literature concerning the relationship between obesity and mortality in the elderly. *J Nutr Health Aging*. 2012;16:89-98.
- (679) Chang SH, Beason TS, Hunleth JM, Colditz GA. A systematic review of body fat distribution and mortality in older people. *Maturitas*. 2012;72:175-191.
- (680) Walls HL, Backholer K, Proietto J, McNeil JJ. Obesity and trends in life expectancy. *J Obes*. 2012;2012:107989.
- (681) Kramer CK, Zinman B, Retnakaran R. Are metabolically healthy overweight and obesity benign conditions?: A systematic review and meta-analysis. *Ann Intern Med*. 2013;159:758-769.
- (682) Carmienke S, Freitag MH, Pischon T et al. General and abdominal obesity parameters and their combination in relation to mortality: a systematic review and meta-regression analysis. *Eur J Clin Nutr*. 2013;67:573-585.
- (683) Cameron AJ, Magliano DJ, Soderberg S. A systematic review of the impact of including both waist and hip circumference in risk models for cardiovascular diseases, diabetes and mortality. *Obesity Reviews*. 2013;14:86-94.
- (684) White FM, Pereira LH. Obesity: epidemiology and the problem of measurement. *Can J Surg*. 1984;27:120-123.
- (685) Hoffmans MD, Kromhout D, de Lezenne CC. The impact of body mass index of 78,612 18-year old Dutch men on 32-year mortality from all causes. *J Clin Epidemiol*. 1988;41:749-756.
- (686) Auyeung TW, Lee JS, Leung J, Kwok T, Leung PC, Woo J. Survival in older men may benefit from being slightly overweight and centrally obese--a 5-year follow-up study in 4,000 older adults using DXA. *J Gerontol A Biol Sci Med Sci*. 2010;65:99-104.
- (687) Lin YP, Huang YH, Lu FH, Wu JS, Chang CJ, Yang YC. Non-leisure time physical activity is an independent predictor of longevity for a Taiwanese elderly population: an eight-year follow-up study. *BMC Public Health*. 2011;11:428.





|                                    |                                |                                    |                                                                                                                                                                    |               |                                                              |                                                                                   |                                                                                                                                                           |                                                                                                                                                                                                                                                                                                          |                                                                                                                                                                                                                                                                                                                  |                                        |
|------------------------------------|--------------------------------|------------------------------------|--------------------------------------------------------------------------------------------------------------------------------------------------------------------|---------------|--------------------------------------------------------------|-----------------------------------------------------------------------------------|-----------------------------------------------------------------------------------------------------------------------------------------------------------|----------------------------------------------------------------------------------------------------------------------------------------------------------------------------------------------------------------------------------------------------------------------------------------------------------|------------------------------------------------------------------------------------------------------------------------------------------------------------------------------------------------------------------------------------------------------------------------------------------------------------------|----------------------------------------|
| Lee IM et al, 1993, USA            | Harvard Alumni Health Study    | 1962-66 – 1988, 27 years follow-up | 19297 men, mean age 46.6 years: 4370 deaths<br><br>3965 never smokers: 578 deaths<br><br>6199 former smokers: 1398 deaths<br><br>9133 current smokers: 2394 deaths | Self-reported | Excluded prevalent coronary heart disease, stroke and cancer | Stratified by follow-up period and first 5 years excluded in sensitivity analyses | BMI, all<br><br>BMI, never smokers, excluding first 5 years of follow-up<br><br>BMI, never smokers<br><br>BMI, former smokers<br><br>BMI, current smokers | <22.5<br>22.5-<23.5<br>23.5-<24.5<br>24.5-<26.0<br>≥26.0<br><22.5<br>22.5-<23.5<br>23.5-<24.5<br>24.5-<26.0<br>≥26.0<br><22.5<br>22.5-<23.5<br>23.5-<24.5<br>24.5-<26.0<br>≥26.0<br><22.5<br>22.5-<23.5<br>23.5-<24.5<br>24.5-<26.0<br>≥26.0<br><22.5<br>22.5-<23.5<br>23.5-<24.5<br>24.5-<26.0<br>≥26.0 | 1.00<br>0.99 (0.89-1.20)<br>0.95 (0.87-1.05)<br>1.01 (0.91-1.10)<br>1.18 (1.08-1.28)<br>1.00<br>1.23<br>1.06<br>1.27<br>1.67 (1.29-2.17)<br>1.00<br>1.20<br>1.05<br>1.21<br>1.57 (1.23-2.00)<br>1.00<br>1.08<br>1.10<br>1.05<br>1.25 (1.06-1.47)<br>1.00<br>0.91<br>0.87 (0.77-0.98)<br>0.96<br>1.06 (0.94-1.19) | Age, smoking status, physical activity |
| Kornitzer M et al, 1993, Belgium   | Belgian Bank Study             | 1964-1965 -NA, 25 years follow-up  | 1227 men, age 40-59 years: 453 deaths                                                                                                                              | Measured      | Subjects with coronary heart disease were excluded           | No                                                                                | BMI                                                                                                                                                       | <23.4<br>23.4-26.0<br>≥26.0                                                                                                                                                                                                                                                                              | 1.00<br>0.86 (0.79-1.02)<br>1.02 (0.88-1.23)                                                                                                                                                                                                                                                                     | Age                                    |
| Sorkin JD et al, 1994, USA         | Adventist Mortality Study      | 1960 – 1985, 15 years follow-up    | 8828 men, age 30-89 years: 3444 deaths                                                                                                                             | Self-reported | No                                                           | No                                                                                | BMI                                                                                                                                                       | ≤22.3<br>22.4-24.2<br>24.3-25.7<br>25.8-27.5<br>>27.5                                                                                                                                                                                                                                                    | 0.86 (0.78-0.95)<br>0.86 (0.77-0.95)<br>0.88 (0.79-0.98)<br>0.88 (0.80-0.98)<br>1.00                                                                                                                                                                                                                             | Age                                    |
| Norrish A et al, 1995, New Zealand | The Auckland Risk Factor Study | 1982-1991, 9 years follow-up       | 1029 men, age 35-64 years: 96 deaths                                                                                                                               | Measured      | No                                                           | No                                                                                | BMI                                                                                                                                                       | <22.9<br>22.9-25.6<br>>25.6                                                                                                                                                                                                                                                                              | 1.00<br>1.14 (0.66-1.95)<br>1.59 (0.94-2.66)                                                                                                                                                                                                                                                                     | Age, smoking status, alcohol, SES      |
| Hanson RL et al, 1995, USA         | Gila River Indian Community    | 1965-1990, 8.1 years follow-up     | 814 diabetic and 1814 nondiabetic participants, age >20 years: 570 deaths                                                                                          | Measured      | No                                                           | No                                                                                | BMI, no diabetes<br><br>BMI, with diabetes                                                                                                                | <25<br>25-30<br>30-35<br>35-40<br>≥40<br><25                                                                                                                                                                                                                                                             | 1.5 (1.0-2.2)<br>1.0 (0.7-1.5)<br>1.0<br>1.2 (0.8-1.9)<br>1.9 (1.2-3.1)<br>1.4 (1.0-2.1)                                                                                                                                                                                                                         | Age, sex, smoking status               |

|                                     |                                                            |                                              |                                                                                                                                           |          |    |                                                                                       |                                                                                                                                                                                      |                                                                                                                                                                                                                                                                      |                                                                                                                                                                                                                                                                                                                                                          |                                    |
|-------------------------------------|------------------------------------------------------------|----------------------------------------------|-------------------------------------------------------------------------------------------------------------------------------------------|----------|----|---------------------------------------------------------------------------------------|--------------------------------------------------------------------------------------------------------------------------------------------------------------------------------------|----------------------------------------------------------------------------------------------------------------------------------------------------------------------------------------------------------------------------------------------------------------------|----------------------------------------------------------------------------------------------------------------------------------------------------------------------------------------------------------------------------------------------------------------------------------------------------------------------------------------------------------|------------------------------------|
|                                     |                                                            |                                              |                                                                                                                                           |          |    |                                                                                       |                                                                                                                                                                                      | 25-30<br>30-35<br>35-40<br>≥40                                                                                                                                                                                                                                       | 1.2 (0.9-1.7)<br>1.0<br>1.3 (0.8-2.3)<br>2.1 (1.0-4.5)                                                                                                                                                                                                                                                                                                   |                                    |
| Seidell JC et al, 1996, Netherlands | The Consultation Bureau Project on Cardiovascular Diseases | 1974-80 – 1993, 12 years follow-up           | 48287 men and women, age 30-54 years: 1319 deaths                                                                                         | Measured | No | First 5 years of follow-up excluded in sensitivity analyses (partly reported results) | BMI, men<br><br>BMI, women                                                                                                                                                           | <18.5<br>18.5-24.99<br>25.0-26.99<br>27.0-29.99<br>≥30.0<br><18.5<br>18.5-24.99<br>25.0-26.99<br>27.0-29.99<br>≥30.0                                                                                                                                                 | 2.60 (1.75-3.86)<br>1.00<br>0.89 (0.74-1.07)<br>1.12 (0.92-1.36)<br>1.47 (1.09-1.98)<br>1.13 (0.68-1.87)<br>1.00<br>0.81 (0.61-1.06)<br>1.12 (0.84-1.47)<br>1.08 (0.74-1.45)                                                                                                                                                                             | Age                                |
| Hodge AM et al, 1996, Nauru, Fiji   | Nauru, Fiji                                                | 1980/1982 - 1991/1992, 10/11 years follow-up | 1400 Micronesian Nauruans<br>1279 Melanesian Fijians<br>And 1182 Indian Fijians, age ≥20 years:<br>209 deaths<br>173 deaths<br>129 deaths | Measured | No | No                                                                                    | BMI, Nauru, men<br><br>BMI, Melanesian Fijians, men<br><br>BMI, Indian Fijians, men<br><br>BMI, Nauru, women<br><br>BMI, Melanesian Fijians, women<br><br>BMI, Indian Fijians, women | <29.0<br>29.0-32.5<br>32.6-36.3<br>≥36.4<br><23.3<br>23.3-25.2<br>25.3-27.8<br>≥27.9<br><19.7<br>19.7-22.2<br>22.3-25.2<br>≥25.3<br><29.5<br>29.5-34.4<br>34.5-39.4<br>≥39.5<br><23.7<br>23.7-27.0<br>27.1-30.8<br>≥30.9<br><19.6<br>19.6-23.1<br>23.1-27.2<br>≥27.2 | 1.4 (0.8-2.5)<br>1.2 (0.7-2.0)<br>1.2 (0.7-2.2)<br>1.0<br>1.1 (0.6-1.8)<br>0.8 (0.4-1.4)<br>1.0 (0.6-1.6)<br>1.0<br>1.3 (0.7-2.4)<br>0.9 (0.4-1.9)<br>1.1 (0.6-1.9)<br>1.0<br>0.8 (0.4-1.6)<br>0.8 (0.4-1.6)<br>0.8 (0.4-1.6)<br>1.0<br>2.7 (1.4-5.4)<br>0.8 (0.3-1.8)<br>1.4 (0.7-2.8)<br>1.0<br>1.6 (0.7-3.9)<br>2.0 (1.0-4.2)<br>0.7 (0.3-1.6)<br>1.0 | Age, diabetes, smoking status      |
| Chyou PH et al, 1997, USA           | Honolulu Heart Program                                     | 1965-1968 – 1991, 22 years follow-up         | 8006 Japanese American man, age 45-68 years: 2667 deaths                                                                                  | Measured | No | No                                                                                    | BMI                                                                                                                                                                                  | <21.21<br>21.21-23.00<br>23.01-24.60<br>24.61-26.30<br>≥26.31                                                                                                                                                                                                        | 1.13 (1.03-1.24)<br>0.98 (0.88-1.09)<br>1.00<br>1.01 (0.91-1.12)<br>1.29 (1.17-1.42)                                                                                                                                                                                                                                                                     | Age, alcohol, smoking – pack years |



|                               |                           |                                         |                                                      |               |                            |                                              |                                                                                                                                                                                  |                                                                                                                                                                                                 |                                                                                                                                                                                                                                                                                              |                                                                               |
|-------------------------------|---------------------------|-----------------------------------------|------------------------------------------------------|---------------|----------------------------|----------------------------------------------|----------------------------------------------------------------------------------------------------------------------------------------------------------------------------------|-------------------------------------------------------------------------------------------------------------------------------------------------------------------------------------------------|----------------------------------------------------------------------------------------------------------------------------------------------------------------------------------------------------------------------------------------------------------------------------------------------|-------------------------------------------------------------------------------|
|                               |                           |                                         |                                                      |               |                            |                                              | BMI, year 1-8, age 55-74 years                                                                                                                                                   | 24.9-27.4<br>>27.4<br><21.3<br>21.3-22.9<br>23.0-24.8<br>24.9-27.4                                                                                                                              | 0.95 (0.60-1.50)<br>1.62 (1.06-2.49)<br>1.00<br>0.84 (0.49-1.46)<br>0.47 (0.27-0.84)<br>0.86 (0.53-1.41)                                                                                                                                                                                     |                                                                               |
|                               |                           |                                         |                                                      |               |                            |                                              | BMI, year 9-14                                                                                                                                                                   | >27.4<br><21.3<br>21.3-22.9<br>23.0-24.8<br>24.9-27.4                                                                                                                                           | 1.18 (0.74-1.88)<br>1.00<br>0.99 (0.65-1.52)<br>0.87 (0.58-1.30)<br>1.22 (0.83-1.77)                                                                                                                                                                                                         |                                                                               |
|                               |                           |                                         |                                                      |               |                            |                                              | BMI, year, 15-26                                                                                                                                                                 | >27.4<br><21.3<br>21.3-22.9<br>23.0-24.8<br>24.9-27.4<br>>27.4                                                                                                                                  | 1.24 (0.85-1.82)<br>1.00<br>1.14 (0.88-1.47)<br>1.16 (0.91-1.47)<br>1.11 (0.88-1.41)<br>1.35 (1.16-1.71)                                                                                                                                                                                     |                                                                               |
| Lindsted KD et al, 1998, USA  | Adventist Mortality Study | 1960-1985, 26 years follow-up           | 5062 never-smoking men, age 30-74 years: 1034 deaths | Self-reported | No                         | Analyses stratified by duration of follow-up | BMI, age 30-54 years, years 1-8<br>BMI, age 55-74 years<br>BMI, age 30-54 years, years 9-14<br>BMI, age 55-74 years<br>BMI, age 30-54 years, years 15-26<br>BMI, age 55-74 years | 14.3-22.5<br>22.6-27.4<br>27.5-43.9<br>14.3-22.5<br>22.6-27.4<br>27.5-43.9<br>14.3-22.5<br>22.6-27.4<br>27.5-43.9<br>14.3-22.5<br>22.6-27.4<br>27.5-43.9<br>14.3-22.5<br>22.6-27.4<br>27.5-43.9 | 0.72 (0.30-1.72)<br>1.00<br>0.50 (0.21-1.20)<br>1.03 (0.74-1.43)<br>1.00<br>0.78 (0.54-1.14)<br>1.60 (0.85-3.00)<br>1.00<br>1.36 (0.75-2.47)<br>0.71 (0.51-1.00)<br>1.00<br>1.23 (0.93-1.65)<br>0.86 (0.57-1.29)<br>1.00<br>1.67 (1.24-2.25)<br>0.77 (0.61-0.98)<br>1.00<br>1.10 (0.89-1.36) | Age                                                                           |
| Maskarinec G et al, 1998, USA | Hawaii Household Survey   | 1975-1980 – 1994, ~16.5 years follow-up | 27678 men and women, age >30 years: 5011 deaths      | Self-reported | Prevalent cancers excluded | No                                           | BMI, men<br><br>BMI, women                                                                                                                                                       | <19.6<br>19.6-21.3<br>21.4-24.8<br>24.9-29.2<br>29.3-32.5<br>≥32.6<br><18.5<br>18.5-19.9                                                                                                        | 1.33 (1.15-1.53)<br>1.11 (0.99-1.26)<br>1.00<br>1.08 (0.99-1.18)<br>1.45 (1.23-1.72)<br>1.63 (1.32-2.02)<br>1.42 (1.22-1.66)<br>1.00                                                                                                                                                         | Age, ethnicity, years of schooling, alcohol, smoking status and packs per day |

|                                  |                                                             |                                       |                                                                                                                                                           |               |                           |                                                                    |                                                                                                                                                                                |                                                                                                                                                                                                                                                                                                                          |                                                                                                                                                                                                                                                                                                                                                                                                                                                                                                                                              |                                                                                      |
|----------------------------------|-------------------------------------------------------------|---------------------------------------|-----------------------------------------------------------------------------------------------------------------------------------------------------------|---------------|---------------------------|--------------------------------------------------------------------|--------------------------------------------------------------------------------------------------------------------------------------------------------------------------------|--------------------------------------------------------------------------------------------------------------------------------------------------------------------------------------------------------------------------------------------------------------------------------------------------------------------------|----------------------------------------------------------------------------------------------------------------------------------------------------------------------------------------------------------------------------------------------------------------------------------------------------------------------------------------------------------------------------------------------------------------------------------------------------------------------------------------------------------------------------------------------|--------------------------------------------------------------------------------------|
|                                  |                                                             |                                       |                                                                                                                                                           |               |                           |                                                                    |                                                                                                                                                                                | 20.0-23.6<br>23.7-30.3<br>30.4-35.9<br>≥36.0                                                                                                                                                                                                                                                                             | 1.04 (0.93-1.17)<br>1.21 (1.08-1.36)<br>1.52 (1.29-1.78)<br>1.88 (1.50-2.35)                                                                                                                                                                                                                                                                                                                                                                                                                                                                 |                                                                                      |
| Yuan JM et al, 1998, China       | Shanghai Cohort Study                                       | 1986-1989 – 1995, 6.7 years follow-up | 18244 men, age 45-64 years: 1198 deaths<br><br>7803 never smokers: 389 deaths<br><br>10441 ever smokers: 809 deaths<br><br>NA current smokers: 678 deaths | Self-reported | Excluded prevalent cancer | Sensitivity analyses stratified by <4 and ≥4 years follow-up       | BMI<br><br>BMI, never smokers<br><br>BMI, ever smokers<br><br>BMI, current smokers<br><br>BMI, never smokers, <4 years follow-up<br><br>BMI, never smokers, ≥4 years follow-up | <18.5<br>18.5-<21.0<br>21.0-<23.5<br>23.5-<26.0<br>≥26.0<br><br><18.5<br>18.5-<21.0<br>21.0-<23.5<br>23.5-<26.0<br>≥26.0<br><br><18.5<br>18.5-<21.0<br>21.0-<23.5<br>23.5-<26.0<br>≥26.0<br><br><18.5<br>18.5-<21.0<br>21.0-<23.5<br>23.5-<26.0<br>≥26.0<br><br><18.5<br>18.5-<21.0<br>21.0-<23.5<br>23.5-<26.0<br>≥26.0 | 1.16 (0.95-1.42)<br>1.06 (0.91-1.22)<br>1.00<br>1.02 (0.87-1.20)<br>1.04 (0.85-1.28)<br>1.73 (1.23-2.42)<br>1.09 (0.82-1.44)<br>1.00<br>1.11 (0.84-1.48)<br>1.48 (1.08-2.03)<br>0.96 (0.75-1.22)<br>1.03 (0.87-1.23)<br>1.00<br>0.98 (0.80-1.20)<br>0.83 (0.63-1.09)<br>0.89 (0.68-1.17)<br>1.01 (0.84-1.22)<br>1.00<br>0.98 (0.78-1.23)<br>0.78 (0.56-1.08)<br>1.86 (1.18-2.93)<br>1.04 (0.70-1.55)<br>1.00<br>1.03 (0.69-1.54)<br>1.18 (0.73-1.89)<br>1.58 (0.96-2.62)<br>1.13 (0.76-1.69)<br>1.00<br>1.20 (0.80-1.80)<br>1.81 (1.18-2.79) | Age, education, alcohol, smoking status, cigarettes per day, age at starting smoking |
| Seccareccia F et al, 1998, Italy | The Italian Risk Factor and Life Expectancy Pooling Project | 1978-1987-NA, 6 years follow-up       | 32741 men and 30305 women, age 20-69 years: 1373 deaths                                                                                                   | Measured      | No                        | Two first years of follow-up were excluded in sensitivity analyses | BMI, men, age 20-44 years, all subjects<br><br>BMI, men, age 45-69 years                                                                                                       | <20<br>20-24<br>25-29<br>30-34<br>≥35<br><br><20<br>20-24<br>25-29<br>30-34                                                                                                                                                                                                                                              | 1.00<br>0.80 (0.24-2.60)<br>0.69 (0.21-2.28)<br>0.33 (0.07-1.54)<br>0.64 (0.06-6.40)<br>1.62 (1.10-2.38)<br>1.12 (0.97-1.30)<br>1.00<br>1.04 (0.86-1.24)                                                                                                                                                                                                                                                                                                                                                                                     | Age, SBP, serum cholesterol, cigarette smoking                                       |



|  |  |  |  |  |  |  |                                                                                                                                                                                                                                                                                                                            |                                                                                                                                                                                                                                  |                                                                                                                                                                                                                                                                                                                                                                                                                                                                                                                                                                                                                                                                                                                                  |  |
|--|--|--|--|--|--|--|----------------------------------------------------------------------------------------------------------------------------------------------------------------------------------------------------------------------------------------------------------------------------------------------------------------------------|----------------------------------------------------------------------------------------------------------------------------------------------------------------------------------------------------------------------------------|----------------------------------------------------------------------------------------------------------------------------------------------------------------------------------------------------------------------------------------------------------------------------------------------------------------------------------------------------------------------------------------------------------------------------------------------------------------------------------------------------------------------------------------------------------------------------------------------------------------------------------------------------------------------------------------------------------------------------------|--|
|  |  |  |  |  |  |  | BMI, women, age 20-44 years<br>BMI, women, age 45-69 years<br>BMI, men, age 20-44 years,<br>smokers excluded<br>BMI, men, age 45-69 years<br>BMI, women, age 20-44 years<br>BMI, women, age 45-69 years<br>BMI, men, age 20-44 years,<br>early deaths excluded<br>BMI, men, age 45-69 years<br>BMI, women, age 20-44 years | ≥35<br><20<br>20-24<br>25-29<br>30-34<br>≥35<br><20<br>20-24<br>25-29<br>30-34<br>≥35<br><20<br>20-24<br>25-29<br>30-34<br>≥35<br><20<br>20-24<br>25-29<br>30-34<br>≥35<br><20<br>20-24<br>25-29<br>30-34<br>≥35<br><20<br>20-24 | 1.30 (0.84-1.99)<br>1.83 (0.52-6.39)<br>1.32 (0.56-3.12)<br>1.00<br>1.18 (0.31-4.49)<br>4.42 (1.28-15.28)<br>2.47 (1.39-4.37)<br>1.50 (1.05-2.14)<br>1.30 (0.93-1.81)<br>1.00<br>1.40 (0.88-2.22)<br>Model did not<br>converge<br>1.00<br>0.39 (0.20-0.74)<br>0.37 (0.20-0.70)<br>0.42 (0.22-0.81)<br>0.47 (0.20-1.09)<br>4.03 (0.84-19.26)<br>1.97 (0.61-6.40)<br>1.00<br>1.43 (0.26-7.89)<br>6.18 (1.32-29.04)<br>2.19 (1.05-4.55)<br>1.56 (1.04-2.35)<br>1.39 (0.96-2.02)<br>1.00<br>1.61 (0.98-2.66)<br>1.00<br>0.42 (0.13-1.47)<br>0.48 (0.14-1.65)<br>0.38 (0.08-1.64)<br>0.73 (0.07-7.34)<br>1.00<br>0.73 (0.44-1.22)<br>0.69 (0.42-1.15)<br>0.78 (0.46-1.32)<br>0.95 (0.47-1.94)<br>1.97 (0.44-8.85)<br>1.47 (0.50-4.27) |  |
|--|--|--|--|--|--|--|----------------------------------------------------------------------------------------------------------------------------------------------------------------------------------------------------------------------------------------------------------------------------------------------------------------------------|----------------------------------------------------------------------------------------------------------------------------------------------------------------------------------------------------------------------------------|----------------------------------------------------------------------------------------------------------------------------------------------------------------------------------------------------------------------------------------------------------------------------------------------------------------------------------------------------------------------------------------------------------------------------------------------------------------------------------------------------------------------------------------------------------------------------------------------------------------------------------------------------------------------------------------------------------------------------------|--|

|                                 |                                          |                                        |                                                  |          |                       |    |          |                                                                                                                                                                                                                                                                                                                       |                                                                                                                                                                                                                                                                                                                                                                                                                                                  |                                 |
|---------------------------------|------------------------------------------|----------------------------------------|--------------------------------------------------|----------|-----------------------|----|----------|-----------------------------------------------------------------------------------------------------------------------------------------------------------------------------------------------------------------------------------------------------------------------------------------------------------------------|--------------------------------------------------------------------------------------------------------------------------------------------------------------------------------------------------------------------------------------------------------------------------------------------------------------------------------------------------------------------------------------------------------------------------------------------------|---------------------------------|
|                                 |                                          |                                        |                                                  |          |                       |    |          | 25-29<br>30-34<br>$\geq 35$<br><20<br>20-24<br>25-29<br>30-34<br>$\geq 35$<br><20<br>20-24<br>25-29<br>30-34<br>$\geq 35$<br><20<br>20-24<br>25-29<br>30-34<br>$\geq 35$<br><20<br>20-24<br>25-29<br>30-34<br>$\geq 35$<br><20<br>20-24<br>25-29<br>30-34<br>$\geq 35$<br><20<br>20-24<br>25-29<br>30-34<br>$\geq 35$ | 1.00<br>1.20 (0.23-6.24)<br>4.70 (1.06-20.97)<br>2.50 (1.26-4.98)<br>1.46 (0.95-2.24)<br>1.37 (0.92-2.03)<br>1.00<br>1.37 (0.78-2.39)<br>Model did not converge<br><br>1.00<br>0.31 (0.14-0.67)<br>0.33 (0.15-0.70)<br>0.41 (0.19-0.91)<br>0.32 (0.10-0.95)<br>7.34 (1.19-48.11)<br>2.73 (0.55-13.43)<br>1.00<br>1.34 (0.12-14.90)<br>10.14 (1.56-65.91)<br>1.92 (0.73-5.04)<br>1.63 (0.99-2.68)<br>1.55 (0.99-2.44)<br>1.00<br>1.75 (0.96-3.19) |                                 |
| Rosengren A et al, 1999, Sweden | The Multifactor Primary Prevention Trial | 1970-1973 – 1993, 19.7 years follow-up | 6874 men, age 47-55 years: 493 deaths            | Measured | Excluded prevalent MI | No | BMI      | <20<br>20-22.5<br>22.5-25.0<br>25.0-27.5<br>27.5-30.0<br>>30.0                                                                                                                                                                                                                                                        | 1.66 (1.31-2.12)<br>1.00<br>0.95 (0.82-1.10)<br>1.01 (0.87-1.17)<br>1.18 (1.01-1.39)<br>1.55 (1.29-1.85)                                                                                                                                                                                                                                                                                                                                         | Age, smoking, physical activity |
| Allison DB et al, 1999, USA     | Framingham Heart Study                   | 1948-1980, ~42 years follow-up         | 5166 men and women, age 28-62 years: 1964 deaths | Measured | No                    | No | BMI, all | <23<br>23-<25<br>25-<26<br>26-<27<br>27-<28<br>28-<29<br>29-<30<br>30-35<br>>35                                                                                                                                                                                                                                       | 1.12 (0.90-1.30)<br>1.00<br>0.96 (0.80-1.10)<br>1.11 (0.90-1.30)<br>1.04 (0.90-1.20)<br>1.08 (0.90-1.30)<br>1.41 (1.10-1.70)<br>1.60 (1.40-1.80)<br>1.94 (1.50-2.50)                                                                                                                                                                                                                                                                             | Age, sex, smoking status        |



|                              |                                    |                                |                                                                 |               |                                                             |                                              |                                                                                                                                                                                                                                                                                                                                                                                                                                                      |                                                                                                                                                                                                                                                                                                                                                                                                                              |                                                                                                                                                                                                                                                                                                                                                                                                                                                                              |                                                                                                                                                                                             |
|------------------------------|------------------------------------|--------------------------------|-----------------------------------------------------------------|---------------|-------------------------------------------------------------|----------------------------------------------|------------------------------------------------------------------------------------------------------------------------------------------------------------------------------------------------------------------------------------------------------------------------------------------------------------------------------------------------------------------------------------------------------------------------------------------------------|------------------------------------------------------------------------------------------------------------------------------------------------------------------------------------------------------------------------------------------------------------------------------------------------------------------------------------------------------------------------------------------------------------------------------|------------------------------------------------------------------------------------------------------------------------------------------------------------------------------------------------------------------------------------------------------------------------------------------------------------------------------------------------------------------------------------------------------------------------------------------------------------------------------|---------------------------------------------------------------------------------------------------------------------------------------------------------------------------------------------|
|                              |                                    |                                |                                                                 |               |                                                             |                                              |                                                                                                                                                                                                                                                                                                                                                                                                                                                      | 30-35<br>>35                                                                                                                                                                                                                                                                                                                                                                                                                 | 1.36 (1.30-1.40)<br>1.76 (1.70-1.80)                                                                                                                                                                                                                                                                                                                                                                                                                                         |                                                                                                                                                                                             |
| Ostbye T et al, 1999, Canada | Canadian Study of Health and Aging | 1991 – 1996, 5 years follow-up | 9995 men and women, age ≥65 years: 2975 deaths                  | NA            | No                                                          | No                                           | BMI, women<br><br>BMI, men                                                                                                                                                                                                                                                                                                                                                                                                                           | <20<br>20-24.9<br>25.0-26.9<br>≥27.0<br><20<br>20-24.9<br>25.0-26.9<br>≥27.0                                                                                                                                                                                                                                                                                                                                                 | 1.0<br>0.6 (0.3-1.2)<br>0.4 (0.2-1.0)<br>0.3 (0.2-0.7)<br>1.0<br>0.5 (0.1-1.9)<br>0.4 (0.1-1.7)<br>0.3 (0.1-1.2)                                                                                                                                                                                                                                                                                                                                                             | Age, marital status, residence, cognitive impairment, activities of daily living, vision, hearing impairment, Hachinski score, heart disease, respiratory disease, diabetes, smoking status |
| Singh PN et al, 1999, USA    | Adventist Health Study             | 1976-1988, 12 years follow-up  | 20346 never smoking men and women, age 25-84 years: 2364 deaths | Self-reported | Prevalent coronary heart disease, stroke or cancer excluded | Analyses stratified by duration of follow-up | BMI, women, age 25-54 years, follow-up 1-6 years<br><br>BMI, women, age 25-54 years, follow-up 7-12 years<br><br>BMI, men, age 25-54 years, follow-up 1-6 years<br><br>BMI, men, age 25-54 years, follow-up 7-12 years<br><br>BMI, women, age 55-84 years, follow-up 1-6 years<br><br>BMI, women, age 55-84 years, follow-up 7-12 years<br><br>BMI, men, age 55-84 years, follow-up 1-6 years<br><br>BMI, men, age 55-84 years, follow-up 7-12 years | 13.9-20.6<br>20.7-27.4<br>27.5-55.0<br>13.9-20.6<br>20.7-27.4<br>27.5-55.0<br>15.0-22.3<br>22.4-27.3<br>27.4-51.7<br>15.0-22.3<br>22.4-27.3<br>27.4-51.7<br>13.4-20.6<br>20.7-22.4<br>22.5-24.2<br>24.3-27.4<br>27.5-65.6<br>13.4-20.6<br>20.7-22.4<br>22.5-24.2<br>24.3-27.4<br>27.5-65.6<br>13.5-22.3<br>22.4-23.7<br>23.8-25.3<br>25.4-27.3<br>27.4-40.5<br>13.5-22.3<br>22.4-23.7<br>23.8-25.3<br>25.4-27.3<br>27.4-40.5 | 1.2 (0.6-2.6)<br>1.0<br>2.0 (1.0-3.7)<br>0.6 (0.2-1.2)<br>1.0<br>1.9 (1.2-3.0)<br>2.0 (0.9-4.2)<br>1.0<br>1.6 (0.7-3.6)<br>0.9 (0.5-1.9)<br>1.0<br>1.5 (0.8-2.6)<br>1.6 (1.2-2.1)<br>1.4 (1.1-1.9)<br>1.0<br>1.1 (0.9-1.5)<br>1.6 (1.2-2.1)<br>1.3 (1.1-1.6)<br>0.9 (0.7-1.2)<br>1.0<br>1.1 (0.9-1.3)<br>1.5 (1.2-1.8)<br>0.9 (0.6-1.4)<br>1.2 (0.8-1.7)<br>1.0<br>1.0 (0.6-1.4)<br>1.2 (0.8-1.8)<br>1.3 (1.0-1.9)<br>1.5 (1.1-2.0)<br>1.0<br>1.2 (0.9-1.7)<br>1.8 (1.3-2.5) | Age                                                                                                                                                                                         |

|                                  |                                                                                                 |                                           |                                                                                                                     |               |                                                                                                                                                                                                                                                           |                                                           |                                                                                                                                                                                                                                                                                |                                                                                                                                                                                                                                   |                                                                                                                                                                                                                                                                                                                                                                                                                          |                                                                                                                                                                        |
|----------------------------------|-------------------------------------------------------------------------------------------------|-------------------------------------------|---------------------------------------------------------------------------------------------------------------------|---------------|-----------------------------------------------------------------------------------------------------------------------------------------------------------------------------------------------------------------------------------------------------------|-----------------------------------------------------------|--------------------------------------------------------------------------------------------------------------------------------------------------------------------------------------------------------------------------------------------------------------------------------|-----------------------------------------------------------------------------------------------------------------------------------------------------------------------------------------------------------------------------------|--------------------------------------------------------------------------------------------------------------------------------------------------------------------------------------------------------------------------------------------------------------------------------------------------------------------------------------------------------------------------------------------------------------------------|------------------------------------------------------------------------------------------------------------------------------------------------------------------------|
| Stevens J et al, 2000, USA       | Cancer Prevention Study-1                                                                       | 1959-1960 – 1971-1972, 11 years follow-up | 57073 men and 240158 women, never smokers, age 30-70 years: 9498/24700 deaths (no of deaths from NEJM 1998;338:1-7) | Self-reported | Participants with heart disease, stroke or cancer were excluded                                                                                                                                                                                           | No                                                        | BMI, women<br><br>BMI, men                                                                                                                                                                                                                                                     | 18.5-24.9<br>25.0-29.9<br>>30.0<br>18.5-24.9<br>25.0-29.9<br>>30.0                                                                                                                                                                | 1.00<br>1.19 (1.17-1.21)<br>1.58 (1.51-1.65)<br>1.00<br>1.19 (1.13-1.25)<br>1.58 (1.48-1.72)                                                                                                                                                                                                                                                                                                                             | Age, education, physical activity                                                                                                                                      |
| Andersen LB et al, 2000, Denmark | The Copenhagen City Cohort Study, The Glostrup Population studies and the Copenhagen Male Study | 1976-83 – 1994, 13.8 years follow-up      | 13375 women and 17265 men, age 20-93 years: 2881 /5668 deaths                                                       | Measured      | No                                                                                                                                                                                                                                                        | No                                                        | BMI, women<br><br>BMI, men                                                                                                                                                                                                                                                     | <20<br>20-25<br>25.01-27<br>27.01-30<br>>30<br><20<br>20-25<br>25.01-27<br>27.01-30<br>>30                                                                                                                                        | 1.65 (1.46-1.87)<br>1.00<br>0.98 (0.59-1.11)<br>1.10 (0.98-1.23)<br>1.43 (1.28-1.59)<br>1.69 (1.48-1.73)<br>1.00<br>0.93 (0.87-1.00)<br>1.06 (0.98-1.13)<br>1.21 (1.11-1.32)                                                                                                                                                                                                                                             | Age, SBP, serum cholesterol, TG, smoking status, education                                                                                                             |
| Baik I et al, 2000, USA          | Health Professionals Follow-up Study                                                            | 1986-1996, 10 years follow-up             | 39756 men, age 40-75 years: 1972 deaths                                                                             | Self-reported | Participants with prevalent myocardial infarction, angina, coronary artery bypass grafting or angioplasty, stroke, transient cerebral ischemia, peripheral venous thrombosis, intermittent claudication, pulmonary embolus, paroxysmal atrial tachycardia | Sensitivity analyses excluding first 4 years of follow-up | BMI, all<br><br>BMI, subjects without weight loss of ≥10 pounds in the past 5 years, 1986-1996<br><br>BMI, subjects without weight loss of ≥10 pounds in the past 5 years, 1990-1996<br><br>BMI, subjects without weight loss of ≥10 pounds in the past 5 years, age <65 years | <21<br>21.0-22.9<br>23-24.9<br>25-26.9<br>27-29.9<br>≥30<br><21<br>21.0-22.9<br>23-24.9<br>25-26.9<br>27-29.9<br>≥30<br><21<br>21.0-22.9<br>23-24.9<br>25-26.9<br>27-29.9<br>≥30<br><23.0<br>23-24.9<br>25-26.9<br>27-29.9<br>≥30 | 1.47 (1.18-1.83)<br>1.06 (0.91-1.23)<br>1.00<br>1.07 (0.94-1.21)<br>1.17 (1.02-1.34)<br>1.50 (1.27-1.77)<br>1.35 (1.06-1.73)<br>1.07 (0.91-1.26)<br>1.00<br>1.06 (0.93-1.22)<br>1.15 (0.99-1.34)<br>1.53 (1.26-1.82)<br>1.28 (0.88-1.85)<br>0.99 (0.76-1.28)<br>1.00<br>1.03 (0.83-1.26)<br>1.16 (0.92-1.45)<br>1.49 (1.13-1.96)<br>1.00<br>1.21 (0.88-1.65)<br>1.19 (0.87-1.63)<br>1.39 (1.00-1.93)<br>1.97 (1.36-2.84) | Age, smoking status, cigarettes per day, FH – MI or colon cancer before age 60 years, profession, marital status, height, alcohol, vitamin A, vitamin E, dietary fiber |

|                                       |                                              |                               |                                                         |               |                                                                                                   |                                  |                                                                                                |                                                                                |                                                                                                                                      |                                                                                                                                                                                                          |
|---------------------------------------|----------------------------------------------|-------------------------------|---------------------------------------------------------|---------------|---------------------------------------------------------------------------------------------------|----------------------------------|------------------------------------------------------------------------------------------------|--------------------------------------------------------------------------------|--------------------------------------------------------------------------------------------------------------------------------------|----------------------------------------------------------------------------------------------------------------------------------------------------------------------------------------------------------|
|                                       |                                              |                               |                                                         |               | and other heart-rhythm disturbances, cancer, chronic renal failure, and chronic pulmonary disease |                                  | BMI, subjects without weight loss of $\geq 10$ pounds in the past 5 years, age $\geq 65$ years | <23.0<br>23-24.9<br>25-26.9<br>27-29.9<br>$\geq 30$                            | 1.00<br>0.69 (0.48-0.99)<br>0.75 (0.53-1.08)<br>0.83 (0.56-1.23)<br>0.85 (0.49-1.46)                                                 |                                                                                                                                                                                                          |
| Folsom AR et al, 2000, USA            | Iowa Women's Health Study                    | 1986 - 1997, 11-12 years      | 31702 women, age 55-69 years: 2476 deaths               | Self-reported | Excluded prevalent cancer, heart disease, and diabetes                                            | No                               | BMI                                                                                            | <22.80<br>22.80-24.86<br>24.87-27.05<br>27.06-30.20<br>$\geq 30.21$            | 1.00<br>0.76 (0.7-0.9)<br>0.74 (0.7-0.8)<br>0.71 (0.6-0.8)<br>0.91 (0.8-1.0)                                                         | Age, education, physical activity, alcohol, smoking status, age at 1st live birth, estrogen use, vitamin use, energy, whole grain, fruit and vegetables, fish, red meat, Keys score, high blood pressure |
| Fortes C et al, 2000, Italy           | Elderly in Rome                              | 1993-1998, 5 years follow-up  | 162 men and women, age $\geq 65$ years: 53 deaths       | Measured      | Excluded subjects with severe disability                                                          | No                               | BMI                                                                                            | $\leq 21.0$<br>21.1-30.0<br>>30                                                | 1.00<br>0.62 (0.30-1.31)<br>0.57 (0.35-1.42)                                                                                         | Age, sex, education, smoking status, cognitive function, chronic diseases                                                                                                                                |
| Haapanen-Niemi N et al, 2000, Finland | Three Northeastern Municipalities in Finland | 1980-1996, 16 years follow-up | 1090 men and 1122 women, age 35-63 years: 208/87 deaths | Self-reported | Subjects with BMI <20, or disease and symptoms that prevented participation in physical activity  | No                               | BMI, men<br><br>BMI, women                                                                     | 20.0-24.9<br>25.0-29.9<br>$\geq 30.0$<br>20.0-24.9<br>25.0-29.9<br>$\geq 30.0$ | 1.00<br>0.87 (0.64-1.19)<br>1.06 (0.67-1.69)<br>1.00<br>0.87 (0.52-1.46)<br>1.35 (0.76-2.41)                                         | Age, employment status, marital status, perceived health status, smoking status, alcohol                                                                                                                 |
| Hara M et al, 2000, Japan             | Saga Prefecture Japan                        | 1983-1997, 14 years follow-up | 2121 men, age 40-69 years: 309 deaths                   | Self-reported | No                                                                                                | No                               | BMI, men<br><br>BMI, women                                                                     | <20<br>20-<22<br>22-<24<br>$\geq 24$<br><20<br>20-<22<br>22-<24<br>$\geq 24$   | 1.00<br>0.82 (0.51-1.32)<br>0.80 (0.41-1.59)<br>0.54 (0.19-1.54)<br>1.00<br>0.56 (0.25-1.25)<br>0.86 (0.32-2.32)<br>0.73 (0.16-3.24) | Age, health status, smoking status, physical activity, balance of daily food intake                                                                                                                      |
| Strawbridge WJ et al, 2000, USA       | Alameda County Study                         | 1965-1994, 31 years follow-up | 6253 men and women, age 21-75 years: 1295 deaths        | Self-reported | No                                                                                                | First year of follow-up excluded | BMI, all<br><br>BMI, men                                                                       | <18.5<br>18.5-24.9<br>25.0-29.9<br>30.0-34.9<br>$\geq 35.0$<br><18.5           | 1.84 (1.41-2.39)<br>1.00<br>0.82 (0.72-0.92)<br>0.80 (0.63-1.01)<br>1.36 (0.93-2.00)<br>1.40 (0.78-2.50)                             | Age, sex, race/ethnicity, education, chronic bronchitis, cancer, cigarette smoking, physical activity                                                                                                    |

|                                       |                       |                                          |                                                                                                                                                             |          |    |                                     |                                                                                                                                                                      |                                                                                                                                                                                                                      |                                                                                                                                                                                                                                                                                                                                                          |                   |
|---------------------------------------|-----------------------|------------------------------------------|-------------------------------------------------------------------------------------------------------------------------------------------------------------|----------|----|-------------------------------------|----------------------------------------------------------------------------------------------------------------------------------------------------------------------|----------------------------------------------------------------------------------------------------------------------------------------------------------------------------------------------------------------------|----------------------------------------------------------------------------------------------------------------------------------------------------------------------------------------------------------------------------------------------------------------------------------------------------------------------------------------------------------|-------------------|
|                                       |                       |                                          |                                                                                                                                                             |          |    |                                     | BMI, women                                                                                                                                                           | 18.5-24.9<br>25.0-29.9<br>30.0-34.9<br>≥35.0<br><18.5<br>18.5-24.9<br>25.0-29.9<br>30.0-34.9<br>≥35.0                                                                                                                | 1.00<br>0.77 (0.65-0.91)<br>1.09 (0.80-1.50)<br>1.85 (0.87-3.93)<br>2.03 (1.51-2.74)<br>1.00<br>0.89 (0.74-1.09)<br>0.58 (0.41-0.83)<br>1.19 (0.75-1.87)                                                                                                                                                                                                 |                   |
| Visscher TLS et al, 2000, Europe      | Seven Countries Study | 1960-75<br>1970-85<br>15 years follow-up | 7985 men, age 40-59 years: 3777 deaths<br><br>1870 never smokers: 222 deaths<br><br>1153 former smokers: 189 deaths<br><br>4550 current smokers: 936 deaths | Measured | No | First 5 years of follow-up excluded | BMI, 1960-75, never smokers<br><br>BMI, ex-smokers<br><br>BMI, current smokers<br><br>BMI, 1970-85, never smokers<br><br>BMI, ex-smokers<br><br>BMI, current smokers | <18.5<br>18.5-25<br>25-30<br>≥30<br><18.5<br>18.5-25<br>25-30<br>≥30<br><18.5<br>18.5-25<br>25-30<br>≥30<br><18.5<br>18.5-25<br>25-30<br>≥30<br><18.5<br>18.5-25<br>25-30<br>≥30<br><18.5<br>18.5-25<br>25-30<br>≥30 | 2.1 (0.8-5.7)<br>1.0<br>1.3 (0.9-1.7)<br>1.8 (1.2-2.8)<br>2.0 (0.5-8.2)<br>1.0<br>1.0 (0.7-1.3)<br>1.3 (0.8-2.1)<br>2.1 (1.5-2.8)<br>1.0<br>0.9 (0.8-1.1)<br>1.0 (0.7-1.4)<br>2.3 (1.0-5.3)<br>1.0<br>1.0 (0.8-1.2)<br>1.4 (1.0-1.9)<br>2.5 (1.3-4.8)<br>1.0<br>1.1 (0.9-1.4)<br>1.4 (1.0-1.8)<br>1.5 (1.1-2.1)<br>1.0<br>1.0 (0.9-1.1)<br>1.0 (0.8-1.3) | Age, study center |
| Visscher TLS et al, 2001, Netherlands | Rotterdam study       | 1990-93 – 1998, 5.4 years follow-up      | 6296 men and women, age 55-102 years: 479 deaths<br><br>2414 never smokers: 372 deaths<br><br>2573 former                                                   | Measured | No | No                                  | BMI, men, never smokers<br><br>BMI, ex smokers                                                                                                                       | <23.1<br>23.1-24.5<br>24.6-26.1<br>26.2-27.8<br>≥27.9<br><23.1<br>23.1-24.5<br>24.6-26.1<br>26.2-27.8<br>≥27.9                                                                                                       | 1.0 (0.5-1.9)<br>1.0<br>1.0 (0.5-1.9)<br>0.9 (0.5-1.8)<br>0.9 (0.4-1.8)<br>1.1 (0.8-1.6)<br>1.0<br>0.7 (0.5-1.1)<br>0.9 (0.6-1.4)<br>0.8 (0.6-1.2)                                                                                                                                                                                                       | Age               |

|                                   |                             |                                 |                                                             |               |                                                                            |                                                                          |                                                                                                           |                                                                                                                                                                                                                                           |                                                                                                                                                                                                                                                                                                          |                                                                                                                                                                                                                                                                                                                                               |
|-----------------------------------|-----------------------------|---------------------------------|-------------------------------------------------------------|---------------|----------------------------------------------------------------------------|--------------------------------------------------------------------------|-----------------------------------------------------------------------------------------------------------|-------------------------------------------------------------------------------------------------------------------------------------------------------------------------------------------------------------------------------------------|----------------------------------------------------------------------------------------------------------------------------------------------------------------------------------------------------------------------------------------------------------------------------------------------------------|-----------------------------------------------------------------------------------------------------------------------------------------------------------------------------------------------------------------------------------------------------------------------------------------------------------------------------------------------|
|                                   |                             |                                 | smokers: 374 deaths<br><br>1309 current smokers: 210 deaths |               |                                                                            |                                                                          | BMI, current smokers<br><br>BMI, women, never smokers<br><br>BMI, ex smokers<br><br>BMI, current smokers  | <23.1<br>23.1-24.5<br>24.6-26.1<br>26.2-27.8<br>≥27.9<br><23.6<br>23.6-<25.5<br>25.5-<27.5<br>27.5-<30.0<br>≥30.0<br><23.6<br>23.6-<25.5<br>25.5-<27.5<br>27.5-<30.0<br>≥30.0<br><23.6<br>23.6-<25.5<br>25.5-<27.5<br>27.5-<30.0<br>≥30.0 | 1.3 (0.8-2.1)<br>1.0<br>0.8 (0.4-1.3)<br>0.9 (0.5-1.6)<br>0.6 (0.3-1.1)<br>1.0 (0.7-1.5)<br>1.0<br>0.8 (0.5-1.2)<br>0.8 (0.6-1.2)<br>0.8 (0.5-1.1)<br>1.3 (0.7-2.3)<br>1.0<br>1.2 (0.6-2.2)<br>1.3 (0.7-2.3)<br>1.0 (0.5-1.9)<br>1.7 (0.8-3.7)<br>1.0<br>1.4 (0.6-3.0)<br>1.0 (0.5-2.4)<br>0.9 (0.4-2.1) |                                                                                                                                                                                                                                                                                                                                               |
| Grabowski DC et al, 2001, USA     | Longitudinal Study of Aging | 1984-1991, 8 years follow-up    | 7048 men and women, age ≥70 years: 2870 deaths              | Self-reported | Prevalent cancer, diabetes, heart disease excluded in sensitivity analyses | Excluding first 2 years of follow-up in sensitivity analyses             | BMI<br><br>BMI, excluding first 2 years<br><br>BMI, excluding prevalent cancer, diabetes or heart disease | 17.8<br>23.8<br>31.8<br>17.8<br>23.8<br>31.8<br>17.8<br>23.8<br>31.8                                                                                                                                                                      | 1.46 (1.30-1.64)<br>1.00<br>0.86 (0.77-0.97)<br>1.38 (1.20-1.57)<br>1.00<br>0.93 (0.82-1.06)<br>1.40 (1.13-1.74)<br>1.00<br>0.67 (0.51-0.88)                                                                                                                                                             | Age, number of doctor visits, number of hospital bed days, number of short-stay hospital episodes, number of functional limitations, residential stability, urbanization, gender, race, private health insurance, region of the country, ever in a nursing home, education, self-rated health, lives alone, need for proxy, married, Medicaid |
| Katzmarzyk PT et al, 2001, Canada | Canada Fitness Survey       | 1981-1993, 12.4 years follow-up | 10725 men and women, age 20-69 years: 593 deaths            | Measured      | No                                                                         | Sensitivity analysis excluding first 2 years of follow-up (not reported) | BMI<br><br>BMI, men                                                                                       | <18.5<br>18.5-24.9<br>25.0-29.9<br>30.0-34.9<br>≥35.0<br><18.5<br>18.5-24.9<br>25.0-29.9<br>30.0-34.9<br>≥35.0                                                                                                                            | 1.63 (0.93-2.85)<br>1.00<br>1.16 (0.96-1.39)<br>1.25 (0.96-1.65)<br>2.96 (1.39-6.29)<br>2.29 (1.06-4.93)<br>1.00<br>1.08 (0.86-1.36)<br>1.00 (0.68-1.47)<br>2.52 (0.80-7.99)                                                                                                                             | Age, smoking status, alcohol                                                                                                                                                                                                                                                                                                                  |



|                             |                                           |                                       |                                                     |          |                                 |                                                 |                                                                                                                |                                                                                                                                                                                                                                                                  |                                                                                                                                                                                                                                                                                                                                                              |                                                 |
|-----------------------------|-------------------------------------------|---------------------------------------|-----------------------------------------------------|----------|---------------------------------|-------------------------------------------------|----------------------------------------------------------------------------------------------------------------|------------------------------------------------------------------------------------------------------------------------------------------------------------------------------------------------------------------------------------------------------------------|--------------------------------------------------------------------------------------------------------------------------------------------------------------------------------------------------------------------------------------------------------------------------------------------------------------------------------------------------------------|-------------------------------------------------|
|                             |                                           |                                       |                                                     |          |                                 |                                                 | BMI, women                                                                                                     | <18.5<br>18.5-24.9<br>25.0-29.9<br>30.0-34.9<br>≥35.0                                                                                                                                                                                                            | 1.24 (0.54-2.83)<br>1.00<br>1.24 (0.93-1.67)<br>1.59 (1.08-2.34)<br>3.13 (1.15-8.52)                                                                                                                                                                                                                                                                         |                                                 |
| Niverthi M et al, 2001, USA | Life Insurance Applicants                 | 1975-1998 – 1999, 4.7 years follow-up | 356926 men and women, age 18-≥60 years: 4105 deaths | NA       | No                              | No                                              | BMI, all<br><br>BMI, smokers<br><br>BMI, non-smokers                                                           | <19<br>19-21<br>22-24<br>25-27<br>28-30<br>31-33<br>≥34<br>19-21<br>22-24<br>25-27<br>28-30<br>≥31<br><22<br>22-24<br>25-27<br>28-30<br>31-33<br>≥34                                                                                                             | 1.21<br>1.09<br>1.10<br>1.00<br>1.13<br>1.22<br>1.19<br>1.16<br>1.22<br>1.00<br>1.11<br>1.32<br>1.16<br>1.00<br>1.08<br>1.01<br>1.45<br>1.48                                                                                                                                                                                                                 | Age, sex, smoking status, duration of follow-up |
| Dey DK et al, 2001, Sweden  | Geriatric Medicine Department, Gothenburg | 1971-1981 – NA, 15 years follow-up    | 2628 men and women, age 70 years: 781/552 deaths    | Measured | Prevalent cancers were excluded | Excluding first 5 years in sensitivity analyses | BMI, men<br><br>BMI, women<br><br>BMI, men, excluding first 5 years<br><br>BMI, women, excluding first 5 years | 14.0-22.6<br>22.7-24.6<br>24.7-26.4<br>26.5-28.5<br>28.6-39.2<br>14.1-22.5<br>22.6-24.5<br>24.6-26.5<br>26.6-29.2<br>29.3-39.8<br>14.0-22.6<br>22.7-24.6<br>24.7-26.4<br>26.5-28.5<br>28.6-39.2<br>14.1-22.5<br>22.6-24.5<br>24.6-26.5<br>26.6-29.2<br>29.3-39.8 | 1.20 (0.96-1.51)<br>1.07 (0.85-1.34)<br>1.00<br>1.01 (0.81-1.26)<br>1.19 (0.95-1.49)<br>1.49 (1.14-1.96)<br>1.16 (0.88-1.53)<br>1.00<br>1.16 (0.88-1.52)<br>1.25 (0.95-1.64)<br>1.06 (0.79-1.42)<br>1.09 (0.82-1.45)<br>1.00<br>1.07 (0.81-1.42)<br>1.22 (0.92-1.60)<br>1.52 (1.06-2.98)<br>1.35 (0.94-1.93)<br>1.00<br>1.29 (0.90-1.85)<br>1.48 (1.03-2.12) | Birth cohort, smoking                           |

|                                            |                              |                                        |                                                                                                                                                 |          |                                                                    |    |                                                                                                                                                                                                                                                                                                                                                                                                                                  |                                                                                                                                                                                                                                                                                                                                                                                                              |                                                                                                               |
|--------------------------------------------|------------------------------|----------------------------------------|-------------------------------------------------------------------------------------------------------------------------------------------------|----------|--------------------------------------------------------------------|----|----------------------------------------------------------------------------------------------------------------------------------------------------------------------------------------------------------------------------------------------------------------------------------------------------------------------------------------------------------------------------------------------------------------------------------|--------------------------------------------------------------------------------------------------------------------------------------------------------------------------------------------------------------------------------------------------------------------------------------------------------------------------------------------------------------------------------------------------------------|---------------------------------------------------------------------------------------------------------------|
|                                            |                              |                                        |                                                                                                                                                 |          |                                                                    |    | BMI, men, non-smokers<br>14.0-22.6<br>22.7-24.6<br>24.7-26.4<br>26.5-28.5<br>28.6-39.2<br>BMI, women, non-smokers<br>14.1-22.5<br>22.6-24.5<br>24.6-26.5<br>26.6-29.2<br>29.3-39.8<br>BMI, men, non-smokers,<br>excluding first 5 years<br>14.0-22.6<br>22.7-24.6<br>24.7-26.4<br>26.5-28.5<br>28.6-39.2<br>BMI, women, non-smokers,<br>excluding first 5 years<br>14.1-22.5<br>22.6-24.5<br>24.6-26.5<br>26.6-29.2<br>29.3-39.8 | 1.15 (0.71-1.86)<br>1.09 (0.70-1.71)<br>1.00<br>0.96 (0.63-1.47)<br>1.30 (0.87-1.95)<br>1.58 (1.15-2.16)<br>1.04 (0.75-1.44)<br>1.00<br>1.12 (0.82-1.53)<br>1.22 (0.90-1.65)<br>0.91 (0.53-1.58)<br>0.80 (0.47-1.35)<br>1.00<br>0.72 (0.45-1.18)<br>1.11 (0.71-1.74)<br>1.50 (1.03-2.17)<br>1.14 (0.79-1.65)<br>1.00<br>1.24 (0.87-1.77)<br>1.42 (1.00-2.00)                                                 |                                                                                                               |
| Wannamethee SG et al, 2001, United Kingdom | British Regional Heart Study | 1978-1980 – 1997, 13.8 years follow-up | 7065 men, age 40-59 years: 1457 deaths<br>1709 non-smokers: 620 deaths<br>722 recent ex-smokers: 199 deaths<br>2242 current smokers: 648 deaths | Measured | Subjects who had lost weight were excluded in sensitivity analyses | No | BMI, non-smokers (includes long-term ex-smokers)<br><22<br>22-<24<br>24-<26<br>26-<28<br>≥28<br>BMI, recent ex-smokers<br><22<br>22-<24<br>24-<26<br>26-<28<br>≥28<br>BMI, current smokers<br><22<br>22-<24<br>24-<26<br>26-<28<br>≥28<br>BMI, non-smokers, excluding men who lost weight<br><22<br>22-<24<br>24-<26<br>26-<28<br>≥28<br>BMI, recent ex-smokers<br><22<br>22-<24<br>24-<26                                       | 1.00<br>1.04 (0.71-1.53)<br>1.25 (0.87-1.79)<br>1.02 (0.71-1.48)<br>1.31 (0.91-1.88)<br>1.00<br>0.66 (0.36-1.21)<br>0.63 (0.34-1.16)<br>0.52 (0.28-0.95)<br>0.65 (0.36-1.17)<br>1.00<br>0.85 (0.65-1.10)<br>0.92 (0.71-1.18)<br>0.96 (0.74-1.26)<br>0.97 (0.74-1.27)<br>1.00<br>1.30 (0.80-2.13)<br>1.56 (0.98-2.48)<br>1.35 (0.85-2.16)<br>1.61 (1.01-2.56)<br>1.00<br>0.55 (0.28-1.08)<br>0.56 (0.29-1.09) | Age, social class, alcohol intake, physical activity, FEV1, former smoking/number of cigarettes among smokers |

|                                  |                                                      |                                     |                                                                                                     |                            |                                                                                                  |                                                           |                                              |                                                                                                                                |                                                                                                                                                                                          |                                                                                                                                                              |
|----------------------------------|------------------------------------------------------|-------------------------------------|-----------------------------------------------------------------------------------------------------|----------------------------|--------------------------------------------------------------------------------------------------|-----------------------------------------------------------|----------------------------------------------|--------------------------------------------------------------------------------------------------------------------------------|------------------------------------------------------------------------------------------------------------------------------------------------------------------------------------------|--------------------------------------------------------------------------------------------------------------------------------------------------------------|
|                                  |                                                      |                                     |                                                                                                     |                            |                                                                                                  |                                                           | BMI, current smokers                         | 26-<28<br>≥28<br><22<br>22-<24<br>24-<26<br>26-<28<br>≥28                                                                      | 0.52 (0.27-0.99)<br>0.63 (0.34-1.19)<br>1.00<br>0.90 (0.66-1.22)<br>0.99 (0.74-1.32)<br>1.08 (0.79-1.46)<br>1.02 (0.75-1.38)                                                             |                                                                                                                                                              |
| Osler M et al, 2001, Denmark     | Danish MONICA 1-3 surveys                            | 1982-1998, 15 years follow-up       | 2855 men and 2755 women, age 30-70 years: 376/210 deaths                                            | Measured                   | No                                                                                               | No                                                        | BMI, men<br><br>BMI, women                   | <20<br>20-24.9<br>25-29.9<br>>30<br><20<br>20-24.9<br>25-29.9<br>>30                                                           | 1.67 (1.04-2.67)<br>1.00<br>0.91 (0.72-1.14)<br>1.14 (0.83-1.57)<br>1.40 (0.90-2.17)<br>1.00<br>1.07 (0.76-1.50)<br>1.52 (1.01-2.26)                                                     | Age, prudent diet score, self-rated health, physical activity, smoking status, vocational education                                                          |
| Barbagallo CM et al, 2001, Italy | The 'Ventimiglia di Sicilia' project                 | 1989-1997, 8 years follow-up        | 835 men and women, age 20-69 years: 37 deaths                                                       | Measured                   | No                                                                                               | No                                                        | BMI                                          | <27<br>27-29.99<br>≥30.0                                                                                                       | 1.00<br>1.64 (0.65-4.15)<br>2.45 (1.03-5.87)                                                                                                                                             | Age, sex                                                                                                                                                     |
| Farrell SW et al, 2002, USA      | Aerobics Center Longitudinal Study                   | 1970-1996, 11.4 years follow-up     | 9925 women, mean age 42.9 years: 195 deaths                                                         | Measured                   | No                                                                                               | No                                                        | BMI                                          | 18.5-24.99<br>25.0-29.99<br>≥30.0                                                                                              | 1.00<br>0.84 (0.56-1.26)<br>1.21 (0.71-2.05)                                                                                                                                             | Age, smoking, baseline health status, cardiorespiratory fitness                                                                                              |
| Stevens J et al, 2002, USA       | Lipid Research Clinics Study                         | 1972-76 – 1998, ~24 years follow-up | 2506 women, and 2860 men, mean age 46.6/45.1 years: 484/682 deaths                                  | Measured                   | Prevalent coronary heart disease, stroke                                                         | Excluded first year of follow-up                          | BMI, women<br><br>BMI, men                   | 18.7-21.0<br>21.1-22.6<br>22.7-24.4<br>24.5-27.6<br>27.7-42.6<br>19.5-23.6<br>23.7-25.2<br>25.3-26.7<br>26.8-28.6<br>28.7-39.4 | 1.00<br>1.06 (0.74-1.51)<br>0.99 (0.71-1.38)<br>0.94 (0.68-1.30)<br>1.21 (0.87-1.67)<br>1.00<br>1.00 (0.78-1.29)<br>1.00 (0.77-1.31)<br>0.97 (0.75-1.26)<br>1.12 (0.88-1.44)             | Age, education, smoking status, cigarettes per day, alcohol, Keys score, fitness                                                                             |
| Tsugane S et al, 2002, Japan     | Japan Public Health-Center-based Prospective Study 1 | 1990-1999, 10 years follow-up       | 19500 men and 21315 women, age 40-59 years: 943/483 deaths<br><br>8655 and 19749 never smokers: 592 | Self-reported and measured | Excluded prevalent cancer, cerebrovascular disease, myocardial infarction, chronic liver disease | Sensitivity analyses excluding first 5 years of follow-up | BMI, men<br><br>BMI, excluding first 5 years | 14.0-18.9<br>19.0-20.9<br>21.0-22.9<br>23.0-24.9<br>25.0-26.9<br>27.0-29.9<br>30.0-39.9<br>14.0-18.9<br>19.0-20.9<br>21.0-22.9 | 2.26 (1.66-3.08)<br>1.57 (1.25-1.98)<br>1.33 (1.09-1.63)<br>1.00<br>1.14 (0.90-1.45)<br>1.38 (1.03-1.83)<br>1.97 (1.27-3.06)<br>2.35 (1.58-3.49)<br>1.66 (1.24-2.22)<br>1.30 (1.01-1.69) | Age, cigarette smoking status and pack-years, study area, alcohol, education, sports and physical exercise at leisure-time, weight change since 20 years old |

|  |  |  |                                         |  |  |                                                                                  |                                                                                  |           |                  |  |
|--|--|--|-----------------------------------------|--|--|----------------------------------------------------------------------------------|----------------------------------------------------------------------------------|-----------|------------------|--|
|  |  |  | deaths                                  |  |  |                                                                                  |                                                                                  | 23.0-24.9 | 1.00             |  |
|  |  |  | 6686 former smokers (men): 175 deaths   |  |  |                                                                                  |                                                                                  | 25.0-26.9 | 1.19 (0.90-1.61) |  |
|  |  |  |                                         |  |  |                                                                                  |                                                                                  | 27.0-29.9 | 1.19 (0.81-1.73) |  |
|  |  |  |                                         |  |  |                                                                                  |                                                                                  | 30.0-39.9 | 1.51 (0.81-2.82) |  |
|  |  |  | 10400 current smokers (men): 592 deaths |  |  |                                                                                  | BMI, excluding subjects reporting weight loss of $\geq 10$ kg since 20 years old | 14.0-18.9 | 2.41 (1.63-3.55) |  |
|  |  |  |                                         |  |  |                                                                                  |                                                                                  | 19.0-20.9 | 1.52 (1.18-1.96) |  |
|  |  |  |                                         |  |  |                                                                                  |                                                                                  | 21.0-22.9 | 1.26 (1.01-1.56) |  |
|  |  |  |                                         |  |  |                                                                                  |                                                                                  | 23.0-24.9 | 1.00             |  |
|  |  |  |                                         |  |  |                                                                                  |                                                                                  | 25.0-26.9 | 1.08 (0.84-1.38) |  |
|  |  |  |                                         |  |  |                                                                                  |                                                                                  | 27.0-29.9 | 1.34 (1.00-1.80) |  |
|  |  |  |                                         |  |  |                                                                                  |                                                                                  | 30.0-39.9 | 1.80 (1.14-2.85) |  |
|  |  |  |                                         |  |  | BMI, women                                                                       |                                                                                  | 14.0-18.9 | 1.94 (1.30-2.89) |  |
|  |  |  |                                         |  |  |                                                                                  |                                                                                  | 19.0-20.9 | 0.98 (0.69-1.40) |  |
|  |  |  |                                         |  |  |                                                                                  |                                                                                  | 21.0-22.9 | 0.99 (0.74-1.32) |  |
|  |  |  |                                         |  |  |                                                                                  |                                                                                  | 23.0-24.9 | 1.00             |  |
|  |  |  |                                         |  |  |                                                                                  |                                                                                  | 25.0-26.9 | 1.30 (0.96-1.76) |  |
|  |  |  |                                         |  |  |                                                                                  |                                                                                  | 27.0-29.9 | 1.33 (0.94-1.88) |  |
|  |  |  |                                         |  |  |                                                                                  |                                                                                  | 30.0-39.9 | 1.91 (1.22-2.99) |  |
|  |  |  |                                         |  |  | BMI, excluding first 5 years                                                     |                                                                                  | 14.0-18.9 | 1.46 (0.87-2.46) |  |
|  |  |  |                                         |  |  |                                                                                  |                                                                                  | 19.0-20.9 | 0.91 (0.59-1.39) |  |
|  |  |  |                                         |  |  |                                                                                  |                                                                                  | 21.0-22.9 | 0.82 (0.57-1.17) |  |
|  |  |  |                                         |  |  |                                                                                  |                                                                                  | 23.0-24.9 | 1.00             |  |
|  |  |  |                                         |  |  |                                                                                  |                                                                                  | 25.0-26.9 | 1.13 (0.78-1.64) |  |
|  |  |  |                                         |  |  |                                                                                  |                                                                                  | 27.0-29.9 | 0.90 (0.57-1.44) |  |
|  |  |  |                                         |  |  |                                                                                  |                                                                                  | 30.0-39.9 | 1.72 (0.99-2.98) |  |
|  |  |  |                                         |  |  | BMI, excluding subjects reporting weight loss of $\geq 10$ kg since 20 years old |                                                                                  | 14.0-18.9 | 1.60 (0.89-2.88) |  |
|  |  |  |                                         |  |  |                                                                                  |                                                                                  | 19.0-20.9 | 1.00 (0.66-1.50) |  |
|  |  |  |                                         |  |  |                                                                                  |                                                                                  | 21.0-22.9 | 0.94 (0.68-1.31) |  |
|  |  |  |                                         |  |  |                                                                                  |                                                                                  | 23.0-24.9 | 1.00             |  |
|  |  |  |                                         |  |  |                                                                                  |                                                                                  | 25.0-26.9 | 1.34 (0.98-1.84) |  |
|  |  |  |                                         |  |  |                                                                                  |                                                                                  | 27.0-29.9 | 1.35 (0.95-1.92) |  |
|  |  |  |                                         |  |  |                                                                                  |                                                                                  | 30.0-39.9 | 1.91 (1.21-3.03) |  |
|  |  |  |                                         |  |  | BMI, men, never smokers                                                          |                                                                                  | 14.0-18.9 | 2.82 (1.33-5.95) |  |
|  |  |  |                                         |  |  |                                                                                  |                                                                                  | 19.0-20.9 | 1.17 (0.63-2.18) |  |
|  |  |  |                                         |  |  |                                                                                  |                                                                                  | 21.0-22.9 | 1.62 (1.01-2.58) |  |
|  |  |  |                                         |  |  |                                                                                  |                                                                                  | 23.0-24.9 | 1.00             |  |
|  |  |  |                                         |  |  |                                                                                  |                                                                                  | 25.0-26.9 | 1.17 (0.69-1.99) |  |
|  |  |  |                                         |  |  |                                                                                  |                                                                                  | 27.0-29.9 | 1.63 (0.92-2.91) |  |
|  |  |  |                                         |  |  |                                                                                  |                                                                                  | 30.0-39.9 | 1.47 (0.51-4.21) |  |
|  |  |  |                                         |  |  | BMI, men, past smokers                                                           |                                                                                  | 14.0-18.9 | 2.00 (0.80-5.01) |  |
|  |  |  |                                         |  |  |                                                                                  |                                                                                  | 19.0-20.9 | 2.93 (1.75-4.92) |  |
|  |  |  |                                         |  |  |                                                                                  |                                                                                  | 21.0-22.9 | 1.60 (0.99-2.58) |  |
|  |  |  |                                         |  |  |                                                                                  |                                                                                  | 23.0-24.9 | 1.00             |  |

|                               |                           |                                           |                                                                                                                                                         |               |    |                                                                                             |                                                                                                                                                          |                                                                                                                                                                                                                                                                             |                                                                                                                                                                                                                                                                                                                                                                                                                                                                          |              |
|-------------------------------|---------------------------|-------------------------------------------|---------------------------------------------------------------------------------------------------------------------------------------------------------|---------------|----|---------------------------------------------------------------------------------------------|----------------------------------------------------------------------------------------------------------------------------------------------------------|-----------------------------------------------------------------------------------------------------------------------------------------------------------------------------------------------------------------------------------------------------------------------------|--------------------------------------------------------------------------------------------------------------------------------------------------------------------------------------------------------------------------------------------------------------------------------------------------------------------------------------------------------------------------------------------------------------------------------------------------------------------------|--------------|
|                               |                           |                                           |                                                                                                                                                         |               |    |                                                                                             | BMI, men, current smokers                                                                                                                                | 25.0-26.9<br>27.0-29.9<br>30.0-39.9<br>14.0-18.9<br>19.0-20.9<br>21.0-22.9<br>23.0-24.9<br>25.0-26.9<br>27.0-29.9<br>30.0-39.9<br>14.0-18.9<br>19.0-20.9<br>21.0-22.9<br>23.0-24.9<br>25.0-26.9<br>27.0-29.9<br>30.0-39.9                                                   | 1.09 (0.63-1.89)<br>1.57 (0.86-2.86)<br>1.50 (0.52-4.27)<br>2.11 (1.46-3.04)<br>1.37 (1.04-1.81)<br>1.20 (0.94-1.55)<br>1.00<br>1.14 (0.84-1.54)<br>1.19 (0.80-1.78)<br>2.31 (1.34-3.99)<br>2.11 (1.37-3.23)<br>0.99 (0.68-1.45)<br>1.02 (0.75-1.39)<br>1.00<br>1.33 (0.97-1.82)<br>1.23 (0.84-1.79)<br>1.79 (1.08-2.96)                                                                                                                                                 |              |
| Miyazaki M et al, 2002, Japan | Four towns, western Japan | 1987-1990 – 1995-1998, ~8 years follow-up | 7301 men and 8825 women, age 40-69 years: 502 / 287 deaths<br><br>1604 and 7711 never smokers: 293 deaths<br><br>5697 and 1114 ever smokers: 496 deaths | Self-reported | No | First two years of follow-up excluded in sensitivity analyses (risk estimates not reported) | BMI, men<br><br>BMI, men, never smokers<br><br>BMI, women<br><br>BMI, women, never smokers<br><br>BMI, men, ever smokers<br><br>BMI, women, ever smokers | <20<br>20-<22<br>22-<24<br>24-<26<br>≥26<br><20<br>20-<22<br>22-<24<br>24-<26<br>≥26<br><20<br>20-<22<br>22-<24<br>24-<26<br>≥26<br><20<br>20-<22<br>22-<24<br>24-<26<br>≥26<br><20<br>20-<22<br>22-<24<br>24-<26<br>≥26<br><20<br>20-<22<br>22-<24<br>24-<26<br>≥26<br><20 | 1.78 (1.38-2.29)<br>1.35 (1.06-1.73)<br>1.00<br>0.91 (0.67-1.22)<br>1.11 (0.79-1.56)<br>3.30 (1.65-6.60)<br>2.10 (1.05-4.20)<br>1.00<br>0.96 (0.41-2.25)<br>1.37 (0.57-3.31)<br>1.92 (1.35-2.72)<br>1.22 (0.85-1.76)<br>1.00<br>1.26 (0.86-1.84)<br>1.56 (1.05-2.31)<br>2.33 (1.57-3.45)<br>1.27 (0.81-1.84)<br>1.00<br>1.27 (0.82-1.96)<br>1.57 (0.99-2.50)<br>1.61 (1.23-2.11)<br>1.27 (0.97-1.65)<br>1.00<br>0.91 (0.66-1.25)<br>1.09 (0.75-1.55)<br>0.93 (0.42-2.04) | Age, smoking |

|                                  |                                                                              |                                        |                                                                     |          |    |                                                                                    |                                                                                                                                                                            |                                                                                                                                                              |                                                                                                                                                                                                                                                                                                                                                  |                                                                                                                                                                                          |
|----------------------------------|------------------------------------------------------------------------------|----------------------------------------|---------------------------------------------------------------------|----------|----|------------------------------------------------------------------------------------|----------------------------------------------------------------------------------------------------------------------------------------------------------------------------|--------------------------------------------------------------------------------------------------------------------------------------------------------------|--------------------------------------------------------------------------------------------------------------------------------------------------------------------------------------------------------------------------------------------------------------------------------------------------------------------------------------------------|------------------------------------------------------------------------------------------------------------------------------------------------------------------------------------------|
|                                  |                                                                              |                                        |                                                                     |          |    |                                                                                    |                                                                                                                                                                            | 20-<22<br>22-<24<br>24-<26<br>≥26                                                                                                                            | 1.25 (0.59-2.62)<br>1.00<br>1.22 (0.56-2.67)<br>1.46 (0.68-3.11)                                                                                                                                                                                                                                                                                 |                                                                                                                                                                                          |
| Wang Z et al, 2002, Australia    | Aboriginal renal disease screening program                                   | 1992-1995 - 2001, 7.4 years follow-up  | 744 aboriginal adults, age 20-77 years: 87 deaths                   | Measured | No | Excluded first 4 years of follow-up                                                | BMI<br><br>BMI, smoker and drinker<br><br>BMI, non-smoker and non-drinkers<br><br>BMI, either smoker or drinker<br><br>BMI, excluding 1 <sup>st</sup> 4 years of follow-up | 18.1<br>21.7<br>24.7<br>30.1<br>18.1<br>21.7<br>24.7<br>30.1<br>18.1<br>21.7<br>24.7<br>30.1<br>18.1<br>21.7<br>24.7<br>30.1<br>18.1<br>21.7<br>24.7<br>30.1 | 1.00<br>0.92 (0.54-1.59)<br>0.71 (0.40-1.26)<br>0.38 (0.19-0.75)<br>1.00<br>1.08 (0.53-2.20)<br>0.80 (0.36-1.74)<br>0.42 (0.14-1.27)<br>1.00<br>0.41 (0.08-2.02)<br>0.12 (0.02-0.86)<br>0.08 (0.01-0.52)<br>1.00<br>0.74 (0.25-2.20)<br>0.90 (0.33-2.43)<br>0.48 (0.16-1.45)<br>1.00<br>1.13 (0.53-2.40)<br>0.93 (0.42-2.07)<br>0.55 (0.22-1.37) | Age, sex, smoking status, drinking                                                                                                                                                       |
| Miller MD et al, 2002, Australia | The Australian Longitudinal Study of Ageing                                  | 1992-2000, 8 years follow-up           | 1396 men and women, age ≥70 years: 579 deaths                       | Measured | No | No                                                                                 | BMI                                                                                                                                                                        | <20<br>20-25<br>>25-30<br>>30                                                                                                                                | 1.36 (0.94-1.99)<br>1.00<br>0.99 (0.82-1.21)<br>1.13 (0.86-1.49)                                                                                                                                                                                                                                                                                 | Age, sex, marital status, self-rated health, smoking status, comorbid conditions, presence of depression, cognitive performance, assistance required with ADL, corrected arm muscle area |
| Somes GW et al, 2002, USA        | Systolic Hypertension in the Elderly Program                                 | 1984-1990, 4.5 years follow-up         | 4485 men and women, age ≥60 years: 351 deaths                       | Measured | No | First 2 years of follow-up excluded in sensitivity analyses                        | BMI                                                                                                                                                                        | <23.6<br>23.6-<28.0<br>28.0-<31.0<br>≥31.0                                                                                                                   | 1.35 (1.00-1.82)<br>1.00<br>1.02 (0.72-1.45)<br>1.15 (0.76-1.76)                                                                                                                                                                                                                                                                                 | Age, gender, current smoking status, presence of myocardial infarction, diabetes, stroke                                                                                                 |
| Engeland A et al, 2003, Norway   | Norwegian Tuberculosis Screening Program and Norwegian Health Surveys (Nord- | 1963-2000 - 2001, 22.1 years follow-up | 1977953 men and women, age 20-74 years: 722606 deaths<br><br>111846 | Measured | No | Sensitivity analysis excluding first 4 years of follow-up (results did not change) | BMI, men                                                                                                                                                                   | <17.50<br>17.50-18.49<br>18.50-19.49<br>19.50-20.49<br>20.50-21.49<br>21.50-22.49<br>22.50-23.49                                                             | 1.74 (1.62-1.87)<br>1.43 (1.37-1.49)<br>1.29 (1.25-1.32)<br>1.18 (1.15-1.20)<br>1.09 (1.07-1.10)<br>1.02 (1.01-1.04)<br>1.00                                                                                                                                                                                                                     | Age, birth cohort, height                                                                                                                                                                |

|  |                                                                                                                                                                                       |  |                                                    |  |  |  |                                                                                   |                                                                                                                                                                                                                                                                                                                                                                                                                                                                                                                                                                                                                                                                                      |                                                                                                                                                                                                                                                                                                                                                                                                                                                                                                                                                                                                                                                                                                                                                                                                                                                                                                                   |  |
|--|---------------------------------------------------------------------------------------------------------------------------------------------------------------------------------------|--|----------------------------------------------------|--|--|--|-----------------------------------------------------------------------------------|--------------------------------------------------------------------------------------------------------------------------------------------------------------------------------------------------------------------------------------------------------------------------------------------------------------------------------------------------------------------------------------------------------------------------------------------------------------------------------------------------------------------------------------------------------------------------------------------------------------------------------------------------------------------------------------|-------------------------------------------------------------------------------------------------------------------------------------------------------------------------------------------------------------------------------------------------------------------------------------------------------------------------------------------------------------------------------------------------------------------------------------------------------------------------------------------------------------------------------------------------------------------------------------------------------------------------------------------------------------------------------------------------------------------------------------------------------------------------------------------------------------------------------------------------------------------------------------------------------------------|--|
|  | Trøndelag Health Study - HUNT-1 & 2, Hordaland Health Study - HUSK, The Norwegian Counties Study - Finmark, Sogn og Fjordane, Oppland, the Study of 40-year Olds, Oslo Study 1 and 2) |  | (estimated) never smokers: 3776/ 4783 deaths (m/w) |  |  |  | <p>BMI, women</p> <p>BMI, men, never smokers</p> <p>BMI, women, never smokers</p> | <p>23.50-24.99<br/>25.00-27.49<br/>27.50-29.99<br/>30.00-32.49<br/>32.50-34.99<br/>35.00-37.49<br/>37.50-39.99<br/>≥40<br/>&lt;17.50<br/>17.50-18.49<br/>18.50-19.49<br/>19.50-20.49<br/>20.50-21.49<br/>21.50-22.49<br/>22.50-23.49<br/>23.50-24.99<br/>25.00-27.49<br/>27.50-29.99<br/>30.00-32.49<br/>32.50-34.99<br/>35.00-37.49<br/>37.50-39.99<br/>≥40<br/>&lt;17.50<br/>17.50-18.49<br/>18.50-19.49<br/>19.50-20.49<br/>20.50-21.49<br/>21.50-22.49<br/>22.50-23.49<br/>23.50-24.99<br/>25.00-27.49<br/>27.50-29.99<br/>30.00-32.49<br/>32.50-34.99<br/>35.00-37.49<br/>37.50-39.99<br/>≥40<br/>&lt;17.50<br/>17.50-18.49<br/>18.50-19.49<br/>19.50-20.49<br/>20.50-21.49</p> | <p>1.00 (0.99-1.01)<br/>1.04 (1.02-1.05)<br/>1.13 (1.12-1.15)<br/>1.29 (1.27-1.31)<br/>1.47 (1.43-1.51)<br/>1.74 (1.66-1.83)<br/>1.90 (1.74-2.08)<br/>2.53 (2.24-2.85)<br/>1.96 (1.87-2.06)<br/>1.53 (1.47-1.59)<br/>1.32 (1.29-1.36)<br/>1.17 (1.14-1.20)<br/>1.08 (1.06-1.11)<br/>1.03 (1.01-1.05)<br/>1.00<br/>0.98 (0.97-1.00)<br/>1.01 (0.99-1.02)<br/>1.08 (1.06-1.09)<br/>1.16 (1.14-1.18)<br/>1.28 (1.25-1.30)<br/>1.40 (1.37-1.43)<br/>1.62 (1.57-1.67)<br/>1.93 (1.86-2.00)<br/>2.06 (0.91-4.63)<br/>1.23 (0.71-2.15)<br/>1.21 (0.85-1.73)<br/>0.96 (0.73-1.27)<br/>1.04 (0.86-1.26)<br/>0.90 (0.77-1.07)<br/>1.00<br/>1.03 (0.91-1.17)<br/>1.11 (0.98-1.25)<br/>1.34 (1.18-1.53)<br/>1.58 (1.35-1.85)<br/>2.29 (1.85-2.83)<br/>1.47 (1.01-2.15)<br/>3.45 (2.09-5.69)<br/>3.30 (1.93-5.64)<br/>2.39 (1.65-3.45)<br/>1.57 (1.13-2.18)<br/>1.28 (1.02-1.62)<br/>0.98 (0.81-1.18)<br/>1.00 (0.86-1.18)</p> |  |
|--|---------------------------------------------------------------------------------------------------------------------------------------------------------------------------------------|--|----------------------------------------------------|--|--|--|-----------------------------------------------------------------------------------|--------------------------------------------------------------------------------------------------------------------------------------------------------------------------------------------------------------------------------------------------------------------------------------------------------------------------------------------------------------------------------------------------------------------------------------------------------------------------------------------------------------------------------------------------------------------------------------------------------------------------------------------------------------------------------------|-------------------------------------------------------------------------------------------------------------------------------------------------------------------------------------------------------------------------------------------------------------------------------------------------------------------------------------------------------------------------------------------------------------------------------------------------------------------------------------------------------------------------------------------------------------------------------------------------------------------------------------------------------------------------------------------------------------------------------------------------------------------------------------------------------------------------------------------------------------------------------------------------------------------|--|

|                                         |                                         |                                      |                                                   |               |                                                                                              |                                                                                                                    |                            |                                                                                                                                                                    |                                                                                                                                                                                                                                                              |                                                                                                                                                 |
|-----------------------------------------|-----------------------------------------|--------------------------------------|---------------------------------------------------|---------------|----------------------------------------------------------------------------------------------|--------------------------------------------------------------------------------------------------------------------|----------------------------|--------------------------------------------------------------------------------------------------------------------------------------------------------------------|--------------------------------------------------------------------------------------------------------------------------------------------------------------------------------------------------------------------------------------------------------------|-------------------------------------------------------------------------------------------------------------------------------------------------|
|                                         |                                         |                                      |                                                   |               |                                                                                              |                                                                                                                    |                            | 21.50-22.49<br>22.50-23.49<br>23.50-24.99<br>25.00-27.49<br>27.50-29.99<br>30.00-32.49<br>32.50-34.99<br>35.00-37.49<br>37.50-39.99<br>≥40                         | 0.95 (0.83-1.10)<br>1.00<br>0.91 (0.80-1.03)<br>0.97 (0.86-1.09)<br>1.06 (0.94-1.20)<br>1.19 (1.04-1.36)<br>1.23 (1.05-1.44)<br>1.45 (1.21-1.75)<br>1.61 (1.26-2.05)<br>2.47 (1.96-3.11)                                                                     |                                                                                                                                                 |
| Lubin F et al, 2003, Israel             | Israeli Population Registry             | 1982-2000, 18 years follow-up        | 632 men and women, age 41-70 years: 151 deaths    | Measured      | Excluded participant with diabetes or other chronic disease                                  | No                                                                                                                 | BMI                        | <25<br>25-29.9<br>≥30.0                                                                                                                                            | 1.00<br>0.76 (0.53-1.08)<br>1.02 (0.61-1.68)                                                                                                                                                                                                                 | Age, ethnicity, sex, smoking, SBP, physical activity, fatty acids, E% from fat, cholesterol, dietary fiber                                      |
| Thorogood M et al, 2003, United Kingdom | Oxford Vegetarian Study                 | 1980-1984 – 2000, 18 years follow-up | 10858 men and women, age 16-89 years: 1134 deaths | Self-reported | Prevalent cancers excluded                                                                   | First 5 years of follow-up excluded in sensitivity analyses (results not altered, but risk estimates not reported) | BMI                        | <18<br>18-<20<br>20-<22<br>22-<24<br>24-<26<br>26-<28<br>≥28                                                                                                       | 2.07 (1.58-2.70)<br>1.24 (1.02-1.50)<br>1.00<br>1.12 (0.94-1.33)<br>1.29 (1.07-1.56)<br>1.15 (0.90-1.47)<br>1.28 (0.97-1.70)                                                                                                                                 | Age, sex, smoking status and cigarettes per day, pre-existing cardiovascular disease or diabetes                                                |
| Hosegood V et al, 2003, Bangladesh      | Determinants of Natural Fertility Study | 1975-79 - 1993, 19 years follow-up   | 1888 women, mean age 27.9 years: 102 deaths       | Measured      | No                                                                                           | No                                                                                                                 | BMI                        | <17.3<br>17.3-18.41<br>18.42-19.61<br>≥19.62                                                                                                                       | 1.00<br>0.82 (0.50-1.37)<br>0.46 (0.25-0.87)<br>0.89 (0.52-1.52)                                                                                                                                                                                             | Age, education                                                                                                                                  |
| Kuriyama S et al, 2004, Japan           | Miyagi Cohort Study                     | 1990-2001, 10.4 years follow-up      | 39610 men and women, age 40-64 years: 1688 deaths | Self-reported | Prevalent cancers, stroke, myocardial infarction, kidney disease, and liver disease excluded | Excluded first 3 years of follow-up in sensitivity analyses                                                        | BMI, men<br><br>BMI, women | <18.5<br>18.5-20.9<br>21.0-22.9<br>23.0-24.9<br>25.0-26.9<br>27.0-29.9<br>≥30.0<br><18.5<br>18.5-20.9<br>21.0-22.9<br>23.0-24.9<br>25.0-26.9<br>27.0-29.9<br>≥30.0 | 2.05 (1.53-2.74)<br>1.10 (0.92-1.31)<br>0.97 (0.83-1.15)<br>1.00<br>0.92 (0.76-1.12)<br>1.01 (0.80-1.29)<br>1.00 (0.62-1.60)<br>1.76 (1.16-2.67)<br>0.88 (0.66-1.17)<br>0.92 (0.72-1.17)<br>1.00<br>0.91 (0.70-1.17)<br>0.95 (0.70-1.27)<br>1.65 (1.13-2.40) | Age, weight loss of 5 kg or more since age 20 years old, marital status, cigarette smoking status and cigarettes per day, alcohol, walking time |



|                                 |                                        |                                       |                                                                              |                           |                                                                                                                          |                                      |                                                                                                      |                                                                                                                                                                        |                                                                                                                                                                                                                                                                  |                                                                                                                     |
|---------------------------------|----------------------------------------|---------------------------------------|------------------------------------------------------------------------------|---------------------------|--------------------------------------------------------------------------------------------------------------------------|--------------------------------------|------------------------------------------------------------------------------------------------------|------------------------------------------------------------------------------------------------------------------------------------------------------------------------|------------------------------------------------------------------------------------------------------------------------------------------------------------------------------------------------------------------------------------------------------------------|---------------------------------------------------------------------------------------------------------------------|
|                                 |                                        |                                       |                                                                              |                           |                                                                                                                          |                                      | BMI, men, first 3 years of follow-up excluded<br><br>BMI, women, first 3 years of follow-up excluded | <18.5<br>18.5-20.9<br>21.0-22.9<br>23.0-24.9<br>25.0-26.9<br>27.0-29.9<br>≥30.0<br><br><18.5<br>18.5-20.9<br>21.0-22.9<br>23.0-24.9<br>25.0-26.9<br>27.0-29.9<br>≥30.0 | 2.06 (1.49-2.84)<br>1.12 (0.92-1.36)<br>0.98 (0.82-1.17)<br>1.00<br>0.96 (0.77-1.18)<br>1.05 (0.81-1.36)<br>0.85 (0.49-1.49)<br><br>1.83 (1.17-2.88)<br>0.82 (0.60-1.14)<br>0.92 (0.70-1.19)<br>1.00<br>1.02 (0.78-1.34)<br>0.93 (0.67-1.28)<br>1.64 (1.09-2.49) |                                                                                                                     |
| Stevens J et al, 2004, Russia   | Lipid Research Clinics Study - Russia  | 1972-77 – 1995, ~20.5 years follow-up | 1359 Russian men, age 40-59 years: 211 deaths                                | Measured                  | Subjects with coronary heart disease, stroke, and BMI <18.5 were excluded                                                | First year of follow-up was excluded | BMI                                                                                                  | 18.6-22.8<br>22.9-24.8<br>24.9-26.5<br>26.6-28.5<br>28.6-37.4                                                                                                          | 1.00<br>0.90 (0.56-1.44)<br>1.19 (0.74-1.92)<br>0.88 (0.53-1.44)<br>0.88 (0.55-1.41)                                                                                                                                                                             | Age, smoking status and cigarettes per day, education, alcohol, Keys score                                          |
| Sundquist K et al, 2004, Sweden | Swedish Annual Level-of-Living Survey  | 1988-89 – 2000, 12 years follow-up    | 3206 men and women, age 65-≥96 years: 881/925 deaths                         | Self-reported             | No                                                                                                                       | No                                   | BMI                                                                                                  | ≤18.5<br>18.6-<25.0<br>25.0-<30.0<br>≥30.0                                                                                                                             | 1.45 (1.16-1.81)<br>1.00<br>0.87 (0.78-0.96)<br>1.09 (0.91-1.30)                                                                                                                                                                                                 | Age, sex, smoking status, physical activity, education                                                              |
| Maru S et al, 2004, Netherlands | Diagnostisch Onderzoek Mamma-carcinoom | 1974-1977 – 1996, 17 years follow-up  | 8100 women, age 50-66 years: 1269 deaths                                     | Measured                  | Prevalent medication use for hypertension, cardiovascular disease, or diabetes, or being on a salt-free or diabetic diet | No                                   | BMI                                                                                                  | 21.6<br>24.4<br>26.5<br>30.5                                                                                                                                           | 1.0<br>0.9 (0.8-1.1)<br>1.1 (0.9-1.2)<br>1.4 (1.2-1.6)                                                                                                                                                                                                           | Age, smoking status and cigarettes per day, weight change status within a year                                      |
| Hu FB et al, 2004, USA          | Nurses' Health Study                   | 1976 – 2000, 24 years follow-up       | 116564 women, age 30-55 years: 10282 deaths<br><br>51080 never smokers: 3262 | Self-reported (validated) | Prevalent cardiovascular disease and cancer excluded                                                                     | No                                   | BMI, all women                                                                                       | <21.0<br>21.0-22.9<br>23.0-24.9<br>25.0-26.9<br>27.0-29.9<br>30.0-32.9<br>33.0-34.9<br>35.0-39.9                                                                       | 1.00<br>0.91 (0.86-0.97)<br>0.92 (0.87-0.98)<br>0.99 (0.93-1.07)<br>1.26 (1.18-1.36)<br>1.57 (1.44-1.71)<br>1.73 (1.52-1.97)<br>2.02 (1.79-2.29)                                                                                                                 | Age, smoking status and cigarettes per day, PH – CHD, menopausal status and hormone use, alcohol, physical activity |

|                           |                      |                                 |                                                                                                  |          |                                                                     |                                                                                                                 |                                                                                                                                                    |                                                                                                                                                                                                                                                                                                                                                                                                                                                                                                                                                                      |                                                                                                                                                                                                                                                                                                                                                                                                                                                                                                                                                                                                                                                                                                                                                                                     |                                                                                |
|---------------------------|----------------------|---------------------------------|--------------------------------------------------------------------------------------------------|----------|---------------------------------------------------------------------|-----------------------------------------------------------------------------------------------------------------|----------------------------------------------------------------------------------------------------------------------------------------------------|----------------------------------------------------------------------------------------------------------------------------------------------------------------------------------------------------------------------------------------------------------------------------------------------------------------------------------------------------------------------------------------------------------------------------------------------------------------------------------------------------------------------------------------------------------------------|-------------------------------------------------------------------------------------------------------------------------------------------------------------------------------------------------------------------------------------------------------------------------------------------------------------------------------------------------------------------------------------------------------------------------------------------------------------------------------------------------------------------------------------------------------------------------------------------------------------------------------------------------------------------------------------------------------------------------------------------------------------------------------------|--------------------------------------------------------------------------------|
|                           |                      |                                 | <p>deaths</p> <p>27194 former smokers: 1885 deaths</p> <p>37596 current smokers: 5056 deaths</p> |          |                                                                     |                                                                                                                 | <p>BMI, women who never smoked</p> <p>BMI, former smokers</p> <p>BMI, current smokers</p> <p>BMI, all women</p> <p>BMI, women who never smoked</p> | <p>≥40.0</p> <p>&lt;21.0</p> <p>21.0-22.9</p> <p>23.0-24.9</p> <p>25.0-26.9</p> <p>27.0-29.9</p> <p>30.0-32.9</p> <p>33.0-34.9</p> <p>35.0-39.9</p> <p>≥40.0</p> <p>&lt;21.0</p> <p>21.0-22.9</p> <p>23.0-24.9</p> <p>25.0-26.9</p> <p>27.0-29.9</p> <p>30.0-32.9</p> <p>33.0-34.9</p> <p>35.0-39.9</p> <p>≥40.0</p> <p>&lt;21.0</p> <p>21.0-22.9</p> <p>23.0-24.9</p> <p>25.0-26.9</p> <p>27.0-29.9</p> <p>30.0-32.9</p> <p>33.0-34.9</p> <p>35.0-39.9</p> <p>≥40.0</p> <p>&lt;25.0</p> <p>25.0-29.9</p> <p>≥30.0</p> <p>&lt;25.0</p> <p>25.0-29.9</p> <p>≥30.0</p> | <p>2.89 (2.47-3.38)</p> <p>1.00</p> <p>1.02 (0.91-1.15)</p> <p>1.09 (0.97-1.23)</p> <p>1.23 (1.07-1.40)</p> <p>1.61 (1.42-1.83)</p> <p>1.96 (1.69-2.26)</p> <p>2.10 (1.70-2.59)</p> <p>2.29 (1.87-2.80)</p> <p>3.71 (2.91-4.72)</p> <p>1.00</p> <p>0.94 (0.81-1.09)</p> <p>1.05 (0.91-1.22)</p> <p>1.01 (0.85-1.21)</p> <p>1.27 (1.07-1.51)</p> <p>1.68 (1.38-2.04)</p> <p>1.83 (1.39-2.04)</p> <p>2.44 (1.92-3.11)</p> <p>3.52 (2.59-4.80)</p> <p>1.00</p> <p>0.86 (0.80-0.93)</p> <p>0.83 (0.76-0.90)</p> <p>0.90 (0.82-1.00)</p> <p>1.13 (1.02-1.25)</p> <p>1.34 (1.18-1.53)</p> <p>1.60 (1.29-1.98)</p> <p>1.79 (1.45-2.21)</p> <p>2.07 (1.53-2.80)</p> <p>1.00</p> <p>1.13 (1.06-1.20)</p> <p>1.69 (1.57-1.82)</p> <p>1.00</p> <p>1.36 (1.22-1.51)</p> <p>1.99 (1.76-2.25)</p> |                                                                                |
| Hu G et al, 2005, Finland | Finnish MONICA study | 1972-1997, 17.7 years follow-up | 22528 men and 24684 women, age 25-64 years: 7394 deaths                                          | Measured | Subjects with coronary heart disease, stroke, heart failure, cancer | First 2 years of follow-up were excluded in sensitivity analyses, but results were not altered (data not shown) | <p>BMI, men</p> <p>BMI, women</p>                                                                                                                  | <p>&lt;18.5</p> <p>18.5-24.9</p> <p>25.0-29.9</p> <p>≥30.0</p> <p>&lt;18.5</p> <p>18.5-24.9</p> <p>25.0-29.9</p> <p>≥30.0</p>                                                                                                                                                                                                                                                                                                                                                                                                                                        | <p>2.79 (1.85-4.22)</p> <p>1.00</p> <p>0.93 (0.87-1.00)</p> <p>1.17 (1.07-1.28)</p> <p>1.69 (1.15-2.48)</p> <p>1.00</p> <p>1.00 (0.91-1.10)</p> <p>1.15 (1.04-1.27)</p>                                                                                                                                                                                                                                                                                                                                                                                                                                                                                                                                                                                                             | Age, study year, SBP, smoking status, cholesterol, diabetes, physical activity |





|                                      |                                    |                                       |                                                         |               |                                                                                                                                                                      |                                                                         |                                                           |                                                                                                                                 |                                                                                                                                                                                          |                                                                                                                               |
|--------------------------------------|------------------------------------|---------------------------------------|---------------------------------------------------------|---------------|----------------------------------------------------------------------------------------------------------------------------------------------------------------------|-------------------------------------------------------------------------|-----------------------------------------------------------|---------------------------------------------------------------------------------------------------------------------------------|------------------------------------------------------------------------------------------------------------------------------------------------------------------------------------------|-------------------------------------------------------------------------------------------------------------------------------|
|                                      |                                    |                                       |                                                         |               |                                                                                                                                                                      |                                                                         | BMI, postmenopausal women                                 | $\geq 30.0$<br>$< 18.5$<br>18.5-24.9<br>25.0-29.9                                                                               | 2.16 (1.60-2.92)<br>1.56 (0.96-2.55)<br>1.00<br>0.85 (0.67-1.07)                                                                                                                         |                                                                                                                               |
|                                      |                                    |                                       |                                                         |               |                                                                                                                                                                      |                                                                         | BMI, premenopausal women, prevalent cancer cases excluded | $\geq 30.0$<br>$< 18.5$<br>18.5-24.9<br>25.0-29.9                                                                               | 1.28 (0.92-1.77)<br>1.39 (0.88-2.19)<br>1.00<br>1.22 (0.97-1.53)                                                                                                                         |                                                                                                                               |
|                                      |                                    |                                       |                                                         |               |                                                                                                                                                                      |                                                                         | BMI, postmenopausal women                                 | $\geq 30.0$<br>$< 18.5$<br>18.5-24.9<br>25.0-29.9<br>$\geq 30.0$                                                                | 2.54 (1.88-3.42)<br>1.39 (0.78-2.49)<br>1.00<br>0.83 (0.64-1.07)<br>1.35 (0.95-1.91)                                                                                                     |                                                                                                                               |
| Chang-Claude J et al, 2005, Germany  | The German Vegetarian Study        | 1978-1999, 21 years follow-up         | 1904 men and women, age $<34 \geq 75$ years: 456 deaths | Self-reported | No                                                                                                                                                                   | No                                                                      | BMI                                                       | $< 18.5$<br>18.5-25.0<br>$> 25.0$                                                                                               | 1.13 (0.85-1.51)<br>1.00<br>1.12 (0.82-1.51)                                                                                                                                             | Age, sex, smoking status, alcohol consumption, physical activity, education, vegetarian status                                |
| Breeze E et al, 2006, United Kingdom | Whitehall Study                    | 1997-1998 – 2002, 5.4 years follow-up | 3411 ever smoking men, age 40-69 years: 822 deaths      | Measured      | Prevalent CVD, MI, stroke, angina, diabetes, cancer, COPD, claudication excluded in sensitivity analyses                                                             | No                                                                      | BMI, ever smokers                                         | $< 22.7$<br>22.7- $< 24.4$<br>24.4- $< 26.1$<br>$\geq 26.1$                                                                     | 1.20 (1.00-1.50)<br>1.00<br>0.93 (0.70-1.20)<br>1.00 (0.80-1.20)                                                                                                                         | Age, marital status, employment grade, alcohol, unable to do at least one activity of daily living, poor physical performance |
|                                      |                                    |                                       |                                                         |               |                                                                                                                                                                      |                                                                         | BMI, never smokers                                        | $< 22.7$<br>22.7- $< 24.4$<br>24.4- $< 26.1$<br>$\geq 26.1$                                                                     | 1.26 (0.90-1.80)<br>1.00<br>0.78 (0.50-1.20)<br>1.39 (1.00-2.00)                                                                                                                         |                                                                                                                               |
| Gu D et al, 2006, China              | China National Hypertension Survey | 1991 – 1999-2000, 8.3 years follow-up | 154736 men and women, age $\geq 40$ years: 17687 deaths | Measured      | Stratified analyses among high-risk participants (prevalent cardiovascular disease, stroke, cancer, end-stage renal disease, chronic obstructive pulmonary syndrome, | Sensitivity analyses excluding first 3 years of follow-up were reported | BMI, all                                                  | $< 18.5$<br>18.5-19.9<br>20.0-20.9<br>21.0-21.9<br>22.0-22.9<br>23.0-23.9<br>24.0-24.9<br>25.0-26.9<br>27.0-29.9<br>$\geq 30.0$ | 1.65 (1.54-1.77)<br>1.31 (1.22-1.41)<br>1.20 (1.11-1.29)<br>1.12 (1.04-1.21)<br>1.11 (1.03-1.20)<br>1.09 (1.01-1.19)<br>1.00<br>1.00 (0.92-1.08)<br>1.15 (1.06-1.24)<br>1.29 (1.16-1.42) | Age, sex, smoking status, alcohol, physical activity, education, geographic region, urbanization                              |
|                                      |                                    |                                       |                                                         |               |                                                                                                                                                                      |                                                                         | BMI, men                                                  | $< 18.5$<br>18.5-19.9<br>20.0-20.9<br>21.0-21.9<br>22.0-22.9                                                                    | 1.64 (1.49-1.80)<br>1.32 (1.20-1.45)<br>1.17 (1.06-1.30)<br>1.10 (0.99-1.22)<br>1.10 (0.99-1.22)                                                                                         |                                                                                                                               |



|  |  |  |  |  |  |  |                                                                                                                                                                                                                                                                                                                                                                                                                                                                                                                                                                                                                                                                                                                 |                                                                                                                                                                                                                                                                                                                                                                                                                                                                                                                                                                                                                                                                                                                                                                                                                            |  |
|--|--|--|--|--|--|--|-----------------------------------------------------------------------------------------------------------------------------------------------------------------------------------------------------------------------------------------------------------------------------------------------------------------------------------------------------------------------------------------------------------------------------------------------------------------------------------------------------------------------------------------------------------------------------------------------------------------------------------------------------------------------------------------------------------------|----------------------------------------------------------------------------------------------------------------------------------------------------------------------------------------------------------------------------------------------------------------------------------------------------------------------------------------------------------------------------------------------------------------------------------------------------------------------------------------------------------------------------------------------------------------------------------------------------------------------------------------------------------------------------------------------------------------------------------------------------------------------------------------------------------------------------|--|
|  |  |  |  |  |  |  | <p>BMI, former smokers</p> <p>&lt;18.5<br/>18.5-20.9<br/>21.0-23.4<br/>23.5-24.9<br/>25.0-26.4<br/>26.5-27.9<br/>28.0-29.9<br/>30.0-34.9<br/>35.0-39.9<br/>≥40.0</p> <p>BMI, never smokers</p> <p>&lt;18.5<br/>18.5-20.9<br/>21.0-23.4<br/>23.5-24.9<br/>25.0-26.4<br/>26.5-27.9<br/>28.0-29.9<br/>30.0-34.9<br/>35.0-39.9<br/>≥40.0</p> <p>BMI, preexisting chronic disease</p> <p>&lt;18.5<br/>18.5-20.9<br/>21.0-23.4<br/>23.5-24.9<br/>25.0-26.4<br/>26.5-27.9<br/>28.0-29.9<br/>30.0-34.9<br/>35.0-39.9<br/>≥40.0</p> <p>BMI, no preexisting chronic disease</p> <p>&lt;18.5<br/>18.5-20.9<br/>21.0-23.4<br/>23.5-24.9<br/>25.0-26.4<br/>26.5-27.9<br/>28.0-29.9<br/>30.0-34.9<br/>35.0-39.9<br/>≥40.0</p> | <p>2.17 (1.82-2.59)<br/>1.79 (1.64-1.95)<br/>1.19 (1.13-1.26)<br/>1.00<br/>0.98 (0.93-1.03)<br/>0.96 (0.91-1.01)<br/>1.00 (0.95-1.05)<br/>1.07 (1.02-1.12)<br/>1.30 (1.22-1.39)<br/>1.74 (1.58-1.92)<br/>1.67 (1.24-2.24)<br/>1.29 (1.12-1.49)<br/>1.09 (1.00-1.19)<br/>1.00<br/>0.97 (0.89-1.05)<br/>1.09 (1.00-1.18)<br/>1.20 (1.10-1.30)<br/>1.39 (1.28-1.51)<br/>1.91 (1.70-2.15)<br/>2.59 (2.20-3.06)<br/>1.91 (1.66-2.20)<br/>1.60 (1.48-1.73)<br/>1.20 (1.13-1.26)<br/>1.00<br/>0.94 (0.90-0.99)<br/>0.91 (0.86-0.96)<br/>0.94 (0.89-0.99)<br/>0.98 (0.93-1.03)<br/>1.10 (1.02-1.18)<br/>1.41 (1.26-1.57)<br/>1.70 (1.42-2.04)<br/>1.35 (1.24-1.47)<br/>1.08 (1.02-1.13)<br/>1.00<br/>0.96 (0.91-1.01)<br/>0.99 (0.94-1.04)<br/>1.06 (1.00-1.11)<br/>1.19 (1.14-1.25)<br/>1.57 (1.57-1.69)<br/>2.24 (2.02-2.49)</p> |  |
|--|--|--|--|--|--|--|-----------------------------------------------------------------------------------------------------------------------------------------------------------------------------------------------------------------------------------------------------------------------------------------------------------------------------------------------------------------------------------------------------------------------------------------------------------------------------------------------------------------------------------------------------------------------------------------------------------------------------------------------------------------------------------------------------------------|----------------------------------------------------------------------------------------------------------------------------------------------------------------------------------------------------------------------------------------------------------------------------------------------------------------------------------------------------------------------------------------------------------------------------------------------------------------------------------------------------------------------------------------------------------------------------------------------------------------------------------------------------------------------------------------------------------------------------------------------------------------------------------------------------------------------------|--|

|  |  |  |  |  |  |  |                      |           |                  |
|--|--|--|--|--|--|--|----------------------|-----------|------------------|
|  |  |  |  |  |  |  | BMI, all women       | <18.5     | 2.03 (1.84-2.25) |
|  |  |  |  |  |  |  |                      | 18.5-20.9 | 1.30 (1.22-1.38) |
|  |  |  |  |  |  |  |                      | 21.0-23.4 | 1.07 (1.01-1.13) |
|  |  |  |  |  |  |  |                      | 23.5-24.9 | 1.00             |
|  |  |  |  |  |  |  |                      | 25.0-26.4 | 1.00 (0.94-1.07) |
|  |  |  |  |  |  |  |                      | 26.5-27.9 | 1.06 (0.99-1.12) |
|  |  |  |  |  |  |  |                      | 28.0-29.9 | 1.07 (1.01-1.14) |
|  |  |  |  |  |  |  |                      | 30.0-34.9 | 1.18 (1.12-1.25) |
|  |  |  |  |  |  |  |                      | 35.0-39.9 | 1.49 (1.39-1.60) |
|  |  |  |  |  |  |  |                      | ≥40.0     | 1.94 (1.79-2.09) |
|  |  |  |  |  |  |  | BMI, current smokers | <18.5     | 1.87 (1.62-2.17) |
|  |  |  |  |  |  |  |                      | 18.5-20.9 | 1.24 (1.12-1.37) |
|  |  |  |  |  |  |  |                      | 21.0-23.4 | 1.01 (0.92-1.11) |
|  |  |  |  |  |  |  |                      | 23.5-24.9 | 1.00             |
|  |  |  |  |  |  |  |                      | 25.0-26.4 | 0.96 (0.86-1.07) |
|  |  |  |  |  |  |  |                      | 26.5-27.9 | 0.88 (0.78-0.99) |
|  |  |  |  |  |  |  |                      | 28.0-29.9 | 0.94 (0.83-1.05) |
|  |  |  |  |  |  |  |                      | 30.0-34.9 | 1.10 (0.99-1.22) |
|  |  |  |  |  |  |  |                      | 35.0-39.9 | 1.28 (1.10-1.49) |
|  |  |  |  |  |  |  |                      | ≥40.0     | 1.61 (1.33-1.93) |
|  |  |  |  |  |  |  | BMI, former smokers  | <18.5     | 2.45 (2.03-2.96) |
|  |  |  |  |  |  |  |                      | 18.5-20.9 | 1.41 (1.27-1.57) |
|  |  |  |  |  |  |  |                      | 21.0-23.4 | 1.13 (1.04-1.24) |
|  |  |  |  |  |  |  |                      | 23.5-24.9 | 1.00             |
|  |  |  |  |  |  |  |                      | 25.0-26.4 | 1.00 (0.91-1.11) |
|  |  |  |  |  |  |  |                      | 26.5-27.9 | 1.10 (0.99-1.21) |
|  |  |  |  |  |  |  |                      | 28.0-29.9 | 1.09 (0.99-1.20) |
|  |  |  |  |  |  |  |                      | 30.0-34.9 | 1.13 (1.04-1.24) |
|  |  |  |  |  |  |  |                      | 35.0-39.9 | 1.39 (1.25-1.54) |
|  |  |  |  |  |  |  |                      | ≥40.0     | 1.75 (1.56-1.97) |
|  |  |  |  |  |  |  | BMI, never smokers   | <18.5     | 1.70 (1.35-2.15) |
|  |  |  |  |  |  |  |                      | 18.5-20.9 | 1.21 (1.06-1.37) |
|  |  |  |  |  |  |  |                      | 21.0-23.4 | 1.06 (0.96-1.18) |
|  |  |  |  |  |  |  |                      | 23.5-24.9 | 1.00             |
|  |  |  |  |  |  |  |                      | 25.0-26.4 | 1.09 (0.97-1.22) |
|  |  |  |  |  |  |  |                      | 26.5-27.9 | 1.21 (1.08-1.36) |
|  |  |  |  |  |  |  |                      | 28.0-29.9 | 1.27 (1.13-1.42) |
|  |  |  |  |  |  |  |                      | 30.0-34.9 | 1.38 (1.25-1.53) |
|  |  |  |  |  |  |  |                      | 35.0-39.9 | 1.82 (1.62-2.06) |
|  |  |  |  |  |  |  |                      | ≥40.0     | 2.52 (2.20-2.88) |



|                             |                                                   |                                      |                                                                     |               |                                                                   |                                                        |                                     |                                                                                                                        |                                                                                                                                                                                          |                                                                                     |
|-----------------------------|---------------------------------------------------|--------------------------------------|---------------------------------------------------------------------|---------------|-------------------------------------------------------------------|--------------------------------------------------------|-------------------------------------|------------------------------------------------------------------------------------------------------------------------|------------------------------------------------------------------------------------------------------------------------------------------------------------------------------------------|-------------------------------------------------------------------------------------|
|                             |                                                   |                                      |                                                                     |               |                                                                   |                                                        | BMI, preexisting chronic disease    | <18.5<br>18.5-20.9<br>21.0-23.4<br>23.5-24.9<br>25.0-26.4<br>26.5-27.9<br>28.0-29.9<br>30.0-34.9<br>35.0-39.9<br>≥40.0 | 2.02 (1.75-2.32)<br>1.32 (1.21-1.45)<br>1.01 (0.93-1.09)<br>1.00<br>0.94 (0.85-1.03)<br>0.98 (0.89-1.07)<br>0.94 (0.86-1.03)<br>0.95 (0.87-1.03)<br>1.21 (1.10-1.34)<br>1.29 (1.15-1.45) |                                                                                     |
|                             |                                                   |                                      |                                                                     |               |                                                                   |                                                        | BMI, no preexisting chronic disease | <18.5<br>18.5-20.9<br>21.0-23.4<br>23.5-24.9<br>25.0-26.4<br>26.5-27.9<br>28.0-29.9<br>30.0-34.9<br>35.0-39.9<br>≥40.0 | 1.86 (1.61-2.14)<br>1.26 (1.16-1.37)<br>1.12 (1.04-1.20)<br>1.00<br>1.05 (0.97-1.14)<br>1.11 (1.02-1.21)<br>1.15 (1.06-1.25)<br>1.34 (1.24-1.44)<br>1.61 (1.47-1.77)<br>2.42 (2.18-2.68) |                                                                                     |
| Tsai SP et al, 2006, USA    | Shell Oil Company                                 | 1983-2003, 20 years follow-up        | 7139 men and women, age ≥30 years: 970 deaths                       | NA            | No                                                                | No                                                     | BMI                                 | 18.5-24.9<br>25.0-29.9<br>≥30.0                                                                                        | 1.00<br>0.94 (0.80-1.09)<br>1.25 (1.03-1.51)                                                                                                                                             | Age, sex, smoking status                                                            |
| Van Dam RM et al, 2006, USA | Nurses' Health Study 2                            | 1989 – 2001, 12 years follow-up      | 102400 women, age 24-44 years: 710 deaths                           | Self-reported | Prevalent cancers or pregnancy at study initiation were excluded  | No                                                     | BMI                                 | <18.5<br>18.5-21.9<br>22.0-24.9<br>25.0-29.9<br>30.0-34.9<br>≥35.0                                                     | 1.67 (1.15-2.42)<br>1.00<br>1.16 (0.96-1.41)<br>1.29 (1.04-1.59)<br>1.35 (1.01-1.80)<br>2.14 (1.61-2.85)                                                                                 | Age, smoking status and cigarettes per day, physical activity, alcohol, HRT, OC use |
| Jee SH et al, 2006, Korea   | Korea National Health Insurance Corporation Study | 1992-1995 – 2004, 12 years follow-up | 1213829 men and women, age 30-95 years: 82372 deaths<br><br>160276/ | Measured      | Atherosclerotic CVD, cancer, liver disease, diabetes, respiratory | First two years of follow-up excluded in main analyses | BMI, men                            | <18.5<br>18.5-19.9<br>20.0-21.4<br>21.5-22.9<br>23.0-24.9<br>25.0-26.4<br>26.5-27.9                                    | 1.35 (1.30-1.41)<br>1.19 (1.15-1.23)<br>1.16 (1.13-1.20)<br>1.09 (1.06-1.12)<br>1.00<br>0.97 (0.94-1.00)<br>0.99 (0.95-1.03)                                                             | Age, cigarette smoking status and number of cigarettes per day, alcohol, exercise   |

|  |  |                                          |  |         |  |                           |                                                                                                                        |                                                                                                                                                                                          |  |
|--|--|------------------------------------------|--|---------|--|---------------------------|------------------------------------------------------------------------------------------------------------------------|------------------------------------------------------------------------------------------------------------------------------------------------------------------------------------------|--|
|  |  | 415790 never smokers: 9657 /18558 deaths |  | disease |  |                           | 28.0-29.9<br>30.0-31.9<br>≥32.0                                                                                        | 1.06 (1.00-1.12)<br>1.20 (1.08-1.34)<br>2.11 (1.78-2.50)                                                                                                                                 |  |
|  |  | 610280 ever smokers (men): 48655         |  |         |  | BMI, women                | <18.5<br>18.5-19.9<br>20.0-21.4<br>21.5-22.9<br>23.0-24.9<br>25.0-26.4<br>26.5-27.9<br>28.0-29.9<br>30.0-31.9<br>≥32.0 | 1.16 (1.09-1.23)<br>1.11 (1.05-1.17)<br>0.99 (0.95-1.04)<br>1.00 (0.95-1.04)<br>1.00<br>0.98 (0.94-1.03)<br>1.02 (0.97-1.08)<br>1.09 (1.02-1.16)<br>1.16 (1.06-1.28)<br>1.22 (1.08-1.38) |  |
|  |  |                                          |  |         |  | BMI, men, never smokers   | <18.5<br>18.5-19.9<br>20.0-21.4<br>21.5-22.9<br>23.0-24.9<br>25.0-26.4<br>26.5-27.9<br>28.0-29.9<br>30.0-31.9<br>≥32.0 | 1.3 (1.2-1.4)<br>1.1 (1.0-1.2)<br>1.0 (1.0-1.1)<br>1.0 (0.9-1.1)<br>1.0<br>1.0 (0.9-1.1)<br>1.1 (1.0-1.2)<br>1.1 (1.0-1.3)<br>1.5 (1.3-1.9)<br>2.5 (1.8-3.5)                             |  |
|  |  |                                          |  |         |  | BMI, men, ever smokers    | <18.5<br>18.5-19.9<br>20.0-21.4<br>21.5-22.9<br>23.0-24.9<br>25.0-26.4<br>26.5-27.9<br>28.0-29.9<br>30.0-31.9<br>≥32.0 | 1.4 (1.3-1.4)<br>1.2 (1.1-1.2)<br>1.2 (1.1-1.2)<br>1.1 (1.1-1.1)<br>1.0<br>1.0 (0.9-1.0)<br>1.0 (0.9-1.0)<br>1.0 (1.0-1.1)<br>1.1 (1.0-1.3)<br>2.1 (1.7-2.5)                             |  |
|  |  |                                          |  |         |  | BMI, women, never smokers | <18.5<br>18.5-19.9<br>20.0-21.4<br>21.5-22.9<br>23.0-24.9<br>25.0-26.4<br>26.5-27.9<br>28.0-29.9<br>30.0-31.9<br>≥32.0 | 1.2 (1.1-1.3)<br>1.1 (1.0-1.1)<br>1.0 (1.0-1.0)<br>1.0 (1.0-1.1)<br>1.0<br>1.0 (0.9-1.0)<br>1.0 (1.0-1.1)<br>1.1 (1.1-1.2)<br>1.2 (1.1-1.3)<br>1.2 (1.1-1.4)                             |  |

|                                      |                                                                             |                                      |                                                                                                                                                          |          |                                                                                                            |                                                           |                                                                                                                                                                                                                                                    |                                                                                                                                                                                                   |                                                                                                                                                                                                                                                                                                                                                                              |                                                                                                                                                                                                                                                    |
|--------------------------------------|-----------------------------------------------------------------------------|--------------------------------------|----------------------------------------------------------------------------------------------------------------------------------------------------------|----------|------------------------------------------------------------------------------------------------------------|-----------------------------------------------------------|----------------------------------------------------------------------------------------------------------------------------------------------------------------------------------------------------------------------------------------------------|---------------------------------------------------------------------------------------------------------------------------------------------------------------------------------------------------|------------------------------------------------------------------------------------------------------------------------------------------------------------------------------------------------------------------------------------------------------------------------------------------------------------------------------------------------------------------------------|----------------------------------------------------------------------------------------------------------------------------------------------------------------------------------------------------------------------------------------------------|
| Lawlor DA et al, 2006, Scotland      | Renfrew/Paisley study                                                       | 1972-1976 – 2004, 28 years follow-up | 8327 women and 7017 men, age 45-64 years: 5242/5019 deaths (m/w)<br><br>1112/3652 never smokers: 666/1986 deaths<br><br>7242 current smokers 5158 deaths | Measured | No                                                                                                         | Sensitivity analyses excluding first 5 years of follow-up | BMI, men<br><br>BMI, women<br><br>BMI, men, never smokers, excl. first 5 years<br><br>BMI, women, never smokers, excl. first 5 years<br><br>BMI, men, current smokers, excl. first 5 years<br><br>BMI, women, current smokers, excl. first 5 years | <18.5<br>18.5-<25<br>25-<30<br>≥30<br><br><18.5<br>18.5-<25<br>25-<30<br>≥30<br><br>18.5-<25<br>25-<30<br>≥30<br><br><18.5<br>18.5-<25<br>25-<30<br>≥30<br><br><18.5<br>18.5-<25<br>25-<30<br>≥30 | 1.34 (1.00-1.81)<br>1.00<br>0.90 (0.85-0.95)<br>1.08 (0.99-1.19)<br>1.80 (1.52-2.14)<br>1.00<br>0.97 (0.91-1.03)<br>1.28 (1.18-1.38)<br>1.00<br>1.38 (1.16-1.66)<br>2.10 (1.66-2.66)<br>1.00<br>1.12 (1.01-1.23)<br>1.56 (1.39-1.76)<br>1.09 (0.76-1.57)<br>1.00<br>0.95 (0.88-1.02)<br>1.08 (0.94-1.24)<br>1.57 (1.28-1.93)<br>1.00<br>0.99 (0.90-1.08)<br>1.24 (1.09-1.40) | Age                                                                                                                                                                                                                                                |
| Lawlor DA et al, 2006, Scotland      | Collaborative Study                                                         | 1970-1973 – 2004, 34 years follow-up | 4016 men, age 45-64 years: 2957 deaths<br><br>573 never smokers: 302 deaths<br><br>2116 current smokers 1609 deaths                                      | Measured | No                                                                                                         | Sensitivity analyses excluding first 5 years of follow-up | BMI<br><br>BMI, never smokers, excl. first 5 years<br><br>BMI, men, current smokers, excl. first 5 years                                                                                                                                           | <18.5<br>18.5-<25<br>25-<30<br>≥30<br><br>18.5-<25<br>25-<30<br>≥30<br><br><18.5<br>18.5-<25<br>25-<30<br>≥30                                                                                     | 1.36 (0.94-1.98)<br>1.00<br>1.01 (0.94-1.09)<br>1.28 (1.11-1.49)<br>1.00<br>1.23 (0.96-1.58)<br>1.96 (1.35-2.84)<br>1.25 (0.82-1.90)<br>1.00<br>1.10 (1.00-1.22)<br>1.22 (0.97-1.54)                                                                                                                                                                                         | Age                                                                                                                                                                                                                                                |
| Price GM et al, 2006, United Kingdom | The MRC Trial of Assessment and Management of Older People in the Community | NA – 2002, 5.9 years follow-up       | 14833 men and women, age >75 years: 6649 deaths                                                                                                          | Measured | Prevalent cancer, MI, stroke, diabetes, Parkinson's disease, hip fracture, angina, weight loss, pneumonia, | First 1 and 2 years excluded in sensitivity analyses      | BMI, nonsmoking men (not current smoking)<br><br>BMI, nonsmoking women                                                                                                                                                                             | 15.9-23.0<br>>23.0-25.0<br>>25.0-26.7<br>>26.7-29.0<br>>29.0-40.4<br><br>14.7-22.3<br>>22.3-24.6<br>>24.6-26.8<br>>26.8-29.7<br>>29.7-45.2                                                        | 1.00<br>0.84 (0.71-0.98)<br>0.77 (0.67-0.88)<br>0.73 (0.63-0.85)<br>0.78 (0.68-0.90)<br>1.00<br>0.92 (0.83-1.02)<br>0.73 (0.65-0.83)<br>0.76 (0.67-0.87)<br>0.82 (0.71-0.93)                                                                                                                                                                                                 | Age, height, serious illness in loved one in the past year, depression, cognitive impairment, unexplained recent weight loss >3.2 kg, housing type, UK quintiles of Carstairs area deprivation score, former smoking (in nonsmokers only), alcohol |

|                                       |                      |                                      |                                                                |                       |                                                                                                                                                                   |    |                                                                                                                                                                                                                |                                                                                                                                                                                                                                                                                                                  |                                                                                                                                                                                                                                                                                                                                                                                                                                                                                           |                                                                                                                                |
|---------------------------------------|----------------------|--------------------------------------|----------------------------------------------------------------|-----------------------|-------------------------------------------------------------------------------------------------------------------------------------------------------------------|----|----------------------------------------------------------------------------------------------------------------------------------------------------------------------------------------------------------------|------------------------------------------------------------------------------------------------------------------------------------------------------------------------------------------------------------------------------------------------------------------------------------------------------------------|-------------------------------------------------------------------------------------------------------------------------------------------------------------------------------------------------------------------------------------------------------------------------------------------------------------------------------------------------------------------------------------------------------------------------------------------------------------------------------------------|--------------------------------------------------------------------------------------------------------------------------------|
|                                       |                      |                                      |                                                                |                       | leg ulcer, cognitively impaired, not able to carry out 1 or more ADLs, $\geq 2$ falls in previous 6 months, no physical activity excluded in sensitivity analyses |    | BMI, smoking men<br><br>BMI, smoking women                                                                                                                                                                     | 15.9-23.0<br>>23.0-25.0<br>>25.0-26.7<br>>26.7-29.0<br>>29.0-40.4<br>14.7-22.3<br>>22.3-24.6<br>>24.6-26.8<br>>26.8-29.7<br>>29.7-45.2                                                                                                                                                                           | 1.00<br>0.65 (0.50-0.86)<br>0.51 (0.38-0.70)<br>0.75 (0.61-1.11)<br>0.73 (0.49-1.10)<br>1.00<br>0.76 (0.55-1.04)<br>0.60 (0.41-0.88)<br>0.51 (0.34-0.78)<br>0.43 (0.27-0.67)                                                                                                                                                                                                                                                                                                              |                                                                                                                                |
| Schooling<br>CM et al,<br>2006, China | Hong Kong<br>Elderly | 1998-2003,<br>4.1 years<br>follow-up | 56167 men<br>and women,<br>age $\geq 65$ years:<br>3819 deaths | Unclear<br>(recorded) | Stratified<br>analyses by<br>number of<br>co-<br>morbidity                                                                                                        | No | BMI<br><br>BMI, excluding 1 <sup>st</sup> 2 years of<br>follow-up<br><br>BMI, 0 comorbidities<br><br>BMI, 1 comorbidity<br><br>BMI, 2 comorbidities<br><br>BMI, 3 comorbidities<br><br>BMI, 4-12 comorbidities | <18.5<br>18.5-<23<br>23-<25<br>$\geq 25$<br><18.5<br>18.5-<23<br>23-<25<br>$\geq 25$<br><18.5<br>18.5-<23<br>23-<25<br>$\geq 25$<br><18.5<br>18.5-<23<br>23-<25<br>$\geq 25$<br><18.5<br>18.5-<23<br>23-<25<br>$\geq 25$<br><18.5<br>18.5-<23<br>23-<25<br>$\geq 25$<br><18.5<br>18.5-<23<br>23-<25<br>$\geq 25$ | 1.78 (1.61-1.97)<br>1.00<br>0.84 (0.77-0.92)<br>0.75 (0.70-0.82)<br>1.72 (1.51-1.97)<br>1.00<br>0.87 (0.78-0.97)<br>0.83 (0.75-0.92)<br>1.76 (1.00-3.08)<br>1.00<br>0.96 (0.58-1.59)<br>1.54 (1.02-2.33)<br>1.41 (1.01-1.97)<br>1.00<br>1.04 (0.81-1.33)<br>0.98 (0.78-1.239)<br>2.22 (1.81-2.73)<br>1.00<br>0.82 (0.68-0.99)<br>0.72 (0.61-0.85)<br>1.81 (1.45-2.26)<br>1.00<br>0.70 (0.58-0.84)<br>0.64 (0.55-0.75)<br>1.76 (1.51-2.07)<br>1.00<br>0.72 (0.63-0.83)<br>0.55 (0.49-0.63) | Age, sex, education, ever<br>drinking alcohol, ever<br>smoking, monthly personal<br>expenditure, housing,<br>physical activity |

|                                      |                                       |                                      |                                                                                                                  |               |                               |                                                             |                                                                                                                                                                                  |                                                                                                                                                                                                                                                                                                                                                                                                                                    |                                                                                                                                                                                                                                                                                                                                                                                                                                                                                                                                                                                                                                                                      |                                                                                                                       |
|--------------------------------------|---------------------------------------|--------------------------------------|------------------------------------------------------------------------------------------------------------------|---------------|-------------------------------|-------------------------------------------------------------|----------------------------------------------------------------------------------------------------------------------------------------------------------------------------------|------------------------------------------------------------------------------------------------------------------------------------------------------------------------------------------------------------------------------------------------------------------------------------------------------------------------------------------------------------------------------------------------------------------------------------|----------------------------------------------------------------------------------------------------------------------------------------------------------------------------------------------------------------------------------------------------------------------------------------------------------------------------------------------------------------------------------------------------------------------------------------------------------------------------------------------------------------------------------------------------------------------------------------------------------------------------------------------------------------------|-----------------------------------------------------------------------------------------------------------------------|
| Baldinger B et al, 2006, Switzerland | Cohort of Swiss Insured Males         | 1976-2001, 8.2 years follow-up       | 22927 men, mean age 39 years: 588 deaths                                                                         | Measured      | No                            | No                                                          | BMI                                                                                                                                                                              | <18.5<br>18.5-24.9<br>25.0-29.9<br>≥30.0                                                                                                                                                                                                                                                                                                                                                                                           | 1.84 (0.76-4.48)<br>1.00<br>1.06 (0.89-1.27)<br>1.76 (1.34-2.30)                                                                                                                                                                                                                                                                                                                                                                                                                                                                                                                                                                                                     | Age, calendar year, blood pressure, smoking, impaired glucose metabolism, history of other disease                    |
| Ray AL et al, 2006, USA              | Women's Health and Aging Study 1 & 2  | 1992-1997, 5 years follow-up         | 632 women, age ≥65 years: 89 deaths                                                                              | NA            | No                            | No                                                          | BMI                                                                                                                                                                              | <18.5<br>18.5-24.9<br>25.0-29.9<br>≥30.0                                                                                                                                                                                                                                                                                                                                                                                           | 2.69 (1.07-6.72)<br>1.00<br>0.59 (0.31-1.13)<br>0.97 (0.51-1.82)                                                                                                                                                                                                                                                                                                                                                                                                                                                                                                                                                                                                     | Age, education, alcohol, smoking status, fair-to-poor appetite, diabetes mellitus, CVD, renal disease, serum selenium |
| Freedman DM et al, 2006, USA         | The US Radiologic Technologists study | 1983-89 – 2000, 14.7 years follow-up | 64733 women and 19011 men, age <35-≥65 years: 2278 / 1495 deaths<br><br>32749/7392 never smokers: 850/365 deaths | Self-reported | Cancer, myocardial infarction | First 5 years of follow-up excluded in sensitivity analyses | BMI, all women<br><br>BMI, women who never smoked<br><br>BMI, women who never smoked and excluding 1st 5 years of follow-up<br><br>BMI, all men<br><br>BMI, men who never smoked | <18.5<br>18.5-20.9<br>21.0-22.9<br>23.0-24.9<br>25.0-26.9<br>27.0-29.9<br>30.0-34.9<br>≥35.0<br><br><18.5<br>18.5-20.9<br>21.0-22.9<br>23.0-24.9<br>25.0-26.9<br>27.0-29.9<br>30.0-34.9<br>≥35.0<br><br><18.5<br>18.5-20.9<br>21.0-22.9<br>23.0-24.9<br>25.0-26.9<br>27.0-29.9<br>30.0-34.9<br>≥35.0<br><br><18.5<br>18.5-20.9<br>21.0-22.9<br>23.0-24.9<br>25.0-26.9<br>27.0-29.9<br>30.0-34.9<br>≥35.0<br><br><18.5<br>18.5-20.9 | 1.64 (1.35-1.98)<br>1.09 (0.96-1.24)<br>1.00<br>1.03 (0.90-1.18)<br>1.15 (0.99-1.34)<br>1.38 (1.18-1.60)<br>1.25 (1.04-1.50)<br>2.10 (1.67-2.65)<br><br>1.55 (1.10-2.17)<br>0.99 (0.80-1.23)<br>1.00<br>1.02 (0.82-1.26)<br>1.30 (1.02-1.65)<br>1.36 (1.07-1.74)<br>1.10 (0.82-1.49)<br>2.14 (1.48-3.09)<br><br>1.05 (0.68-1.61)<br>0.94 (0.74-1.19)<br>1.00<br>1.00 (0.79-1.26)<br>1.30 (1.00-1.69)<br>1.40 (1.08-1.82)<br>1.07 (0.77-1.47)<br>2.37 (1.62-3.48)<br><br>1.34 (0.80-2.23)<br>1.43 (1.14-1.79)<br>1.00<br>0.98 (0.83-1.16)<br>0.79 (0.67-0.94)<br>0.88 (0.74-1.05)<br>1.42 (0.94-2.15)<br>1.84 (1.33-2.56)<br><br>0.90 (0.32-2.55)<br>1.13 (0.68-1.88) | Age, birth cohort, smoking status and duration, alcohol, race, education                                              |

|                              |                                       |                                      |                                                                                                                                                                                         |               |                                  |    |                                                                                                                                                                                                                                                                                                                                                                              |                                                                                                                                                                                                                                                           |                                                                                                                                                                                                                                                                                                                                                                                                                                                                                                                                                  |                                                                                                            |
|------------------------------|---------------------------------------|--------------------------------------|-----------------------------------------------------------------------------------------------------------------------------------------------------------------------------------------|---------------|----------------------------------|----|------------------------------------------------------------------------------------------------------------------------------------------------------------------------------------------------------------------------------------------------------------------------------------------------------------------------------------------------------------------------------|-----------------------------------------------------------------------------------------------------------------------------------------------------------------------------------------------------------------------------------------------------------|--------------------------------------------------------------------------------------------------------------------------------------------------------------------------------------------------------------------------------------------------------------------------------------------------------------------------------------------------------------------------------------------------------------------------------------------------------------------------------------------------------------------------------------------------|------------------------------------------------------------------------------------------------------------|
|                              |                                       |                                      |                                                                                                                                                                                         |               |                                  |    |                                                                                                                                                                                                                                                                                                                                                                              | 21.0-22.9<br>23.0-24.9<br>25.0-26.9<br>27.0-29.9<br>30.0-34.9<br>≥35.0<br><18.5<br>18.5-20.9<br>21.0-22.9<br>23.0-24.9<br>25.0-26.9<br>27.0-29.9<br>30.0-34.9<br>≥35.0                                                                                    | 1.00<br>1.01 (0.73-1.41)<br>0.71 (0.49-1.02)<br>0.84 (0.58-1.22)<br>1.42 (0.94-2.15)<br>2.82 (1.58-5.04)<br>0.62 (0.15-2.62)<br>1.13 (0.62-2.05)<br>1.00<br>1.01 (0.69-1.50)<br>0.80 (0.53-1.20)<br>0.87 (0.57-1.32)<br>1.70 (1.08-2.67)<br>3.46 (1.86-6.43)                                                                                                                                                                                                                                                                                     |                                                                                                            |
| Freedman DM et al, 2006, USA | The US Radiologic Technologists study | 1983-89 – 2002, 16.3 years follow-up | 64120 women and 18760 men, age 22-92 years: 2721/1758 deaths<br><br>NA never smokers: 980/422 deaths<br><br>NA former smokers: 693/700 deaths<br><br>NA current smokers: 889/618 deaths | Self-reported | Cancer and myocardial infarction | No | BMI, women, age <65 years, never smokers<br><br>BMI, women, age ≥65 years, never smokers<br><br>BMI, women, age <65 years, former smokers<br><br>BMI, women, age ≥65 years, former smokers<br><br>BMI, women, age <65 years, current smokers<br><br>BMI, women, age ≥65 years, current smokers<br><br>BMI, men, age <65 years, never smokers<br><br>BMI, men, age ≥65 years, | 18.5-24.9<br>25.0-29.9<br>30.0-34.9<br>≥35.0<br>18.5-24.9<br>25.0-29.9<br>30.0-34.9<br>≥35.0<br>18.5-24.9<br>25.0-29.9<br>30.0-34.9<br>≥35.0<br>18.5-24.9<br>25.0-29.9<br>30.0-34.9<br>≥35.0<br>18.5-24.9<br>25.0-29.9<br>30.0-34.9<br>≥35.0<br>18.5-24.9 | 1.00<br>1.38 (1.10-1.72)<br>0.96 (0.65-1.43)<br>1.87 (1.19-2.95)<br>1.00<br>1.09 (0.89-1.33)<br>1.44 (1.08-1.92)<br>2.57 (1.68-3.95)<br>1.10 (0.91-1.33)<br>1.79 (1.40-2.29)<br>1.57 (1.02-2.40)<br>1.88 (1.10-3.22)<br>1.30 (1.09-1.55)<br>1.64 (1.32-2.04)<br>1.29 (0.88-1.89)<br>2.45 (1.48-4.06)<br>2.22 (1.90-2.60)<br>2.46 (1.96-3.10)<br>3.82 (2.74-5.32)<br>5.20 (3.30-8.20)<br>2.20 (1.86-2.62)<br>2.55 (1.99-3.25)<br>2.66 (1.63-4.36)<br>3.55 (1.57-8.02)<br>1.00<br>0.89 (0.67-1.20)<br>1.35 (0.87-2.08)<br>1.95 (1.02-3.74)<br>1.00 | Birth cohort, race/ethnicity, education, alcohol, year first worked as a radiologic technologist by decade |

|                             |                                                                          |                                     |                                                          |               |    |                                                              |                                                                                                                                                                                                                                                                                                                                                                                                                                |                                                                                                                                                                                                                                                                                                                                                                                           |                                                                                                                                                                                                                                        |
|-----------------------------|--------------------------------------------------------------------------|-------------------------------------|----------------------------------------------------------|---------------|----|--------------------------------------------------------------|--------------------------------------------------------------------------------------------------------------------------------------------------------------------------------------------------------------------------------------------------------------------------------------------------------------------------------------------------------------------------------------------------------------------------------|-------------------------------------------------------------------------------------------------------------------------------------------------------------------------------------------------------------------------------------------------------------------------------------------------------------------------------------------------------------------------------------------|----------------------------------------------------------------------------------------------------------------------------------------------------------------------------------------------------------------------------------------|
|                             |                                                                          |                                     |                                                          |               |    |                                                              | never smokers<br>25.0-29.9<br>30.0-34.9<br>≥35.0<br>BMI, men, age <65 years, former smokers<br>18.5-24.9<br>25.0-29.9<br>30.0-34.9<br>≥35.0<br>BMI, men, age ≥65 years, former smokers<br>18.5-24.9<br>25.0-29.9<br>30.0-34.9<br>≥35.0<br>BMI, men, age <65 years, current smokers<br>18.5-24.9<br>25.0-29.9<br>30.0-34.9<br>≥35.0<br>BMI, men, age ≥65 years, current smokers<br>18.5-24.9<br>25.0-29.9<br>30.0-34.9<br>≥35.0 | 0.77 (0.57-1.03)<br>1.15 (0.70-1.89)<br>3.16 (1.27-7.84)<br>1.19 (0.90-1.58)<br>1.04 (0.79-1.37)<br>1.90 (1.33-2.72)<br>2.05 (1.07-3.95)<br>1.15 (0.90-1.48)<br>1.11 (0.86-1.42)<br>1.79 (1.26-2.55)<br>1.40 (0.59-3.30)<br>2.45 (1.91-3.15)<br>2.14 (1.64-2.79)<br>2.26 (1.49-3.44)<br>4.19 (2.38-7.37)<br>2.36 (1.81-3.09)<br>2.28 (1.69-3.08)<br>2.80 (1.52-5.16)<br>4.29 (1.73-10.64) |                                                                                                                                                                                                                                        |
| Tice JA et al, 2006, USA    | The Breast and Bone Follow-up of the Fracture Intervention Trial (B-FIT) | 1990-1992 – 2001, 9 years follow-up | 17748 postmenopausal women, age 55-80 years: 1886 deaths | Measured      | No | No                                                           | BMI<br><18.5<br>18.5-24.9<br>25.0-29.9<br>30.0-34.9<br>≥35                                                                                                                                                                                                                                                                                                                                                                     | 1.9 (1.4-2.5)<br>1.0<br>0.8 (0.7-0.9)<br>0.7 (0.6-0.8)<br>0.7 (0.6-0.9)                                                                                                                                                                                                                                                                                                                   | Age, hypertension, DM, heart disease, stroke, breast cancer, HRT, weight loss, self-reported health status, smoking status and pack-years, alcohol, physical function scale, WHR, SBP, heart rate, timed up and go test, grip strength |
| Corrada MM et al, 2006, USA | Leisure World Cohort Study                                               | 1981-2004, 23 years follow-up       | 13451 men and women, mean age 73 years: 11203 deaths     | Self-reported | No | Excluding first 5 years of follow-up in sensitivity analyses | BMI<br>17.6<br>22.4<br>26.5<br>31.6<br>BMI, excluding first 5 years of follow-up<br>17.6<br>22.4<br>26.5<br>31.6                                                                                                                                                                                                                                                                                                               | 1.50 (1.37-1.64)<br>1.00<br>0.99 (0.95-1.03)<br>1.18 (1.07-1.31)<br>1.38 (1.24-1.54)<br>1.00<br>1.02 (0.98-1.08)<br>1.22 (1.10-1.37)                                                                                                                                                                                                                                                      | Age, sex, smoking status, activity                                                                                                                                                                                                     |
| Gale CR et al, 2007, UK     | UK Department of Health and Social Security Survey                       | 1973-1974 - NA, 24 years follow-up  | 800 men and women, age ≥65 years: 756 deaths             | Measured      | No | Sensitivity analyses excluding first 5 years of follow-up    | BMI<br><18.5<br>18.5-24.9<br>25-29.9<br>≥30<br>BMI, excluding first 5 years of follow-up<br><18.5<br>18.5-24.9<br>25-29.9                                                                                                                                                                                                                                                                                                      | 1.41 (0.90-2.38)<br>1.00<br>1.00 (0.74-1.34)<br>1.14 (0.76-1.71)<br>2.03 (1.15-3.59)<br>1.00<br>1.05 (0.76-1.45)                                                                                                                                                                                                                                                                          | Age, height, social class, smoking status, reported change in weight, calories, physical activity, diagnosed disease at baseline                                                                                                       |

|                           |                             |                                      |                                                 |          |    |    |                                     |                                          |                                                                  |                                                                                                           |
|---------------------------|-----------------------------|--------------------------------------|-------------------------------------------------|----------|----|----|-------------------------------------|------------------------------------------|------------------------------------------------------------------|-----------------------------------------------------------------------------------------------------------|
|                           |                             |                                      |                                                 |          |    |    |                                     | ≥30                                      | 1.41 (1.05-2.07)                                                 |                                                                                                           |
| Smith TC et al, 2007, USA | Rancho Bernardo Study       | 1984-1986 – 1996, 10 years follow-up | 1627 men and women, age 50-90 years: 538 deaths | Measured | No | No | BMI                                 | <18.5<br>18.5-25.0<br>25.0-29.9<br>≥30.0 | 1.52 (0.90-2.59)<br>1.00<br>0.86 (0.71-1.04)<br>1.02 (0.72-1.43) | Age, sex, smoking status, alcohol, exercise, hypertension, triglycerides, HDL-cholesterol, history of CHD |
| Janssen I, 2007, USA      | Cardiovascular Health Study | 1989-1990 - NA, 9 years follow-up    | 4968 men and women, age ≥65 years: 1464 deaths  | Measured | No | No | BMI, all                            | 20-24.9<br>25-29.9<br>≥30                | 1.00<br>0.92 (0.82 to 1.03)<br>0.94 (0.80 to 1.09)               | Age, sex, race, SES, smoking, status and pack-years, physical activity                                    |
|                           |                             |                                      |                                                 |          |    |    | BMI, men                            | 20-24.9<br>25-29.9<br>≥30                | 1.00<br>0.93 (0.80 to 1.08)<br>0.88 (0.71 to 1.10)               |                                                                                                           |
|                           |                             |                                      |                                                 |          |    |    | BMI, women                          | 20-24.9<br>25-29.9<br>≥30                | 1.00<br>0.90 (0.75 to 1.07)<br>0.98 (0.79 to 1.22)               |                                                                                                           |
|                           |                             |                                      |                                                 |          |    |    | BMI, age 65-74 years                | 20-24.9<br>25-29.9<br>≥30                | 1.00<br>1.01 (0.85 to 1.22)<br>1.02 (0.82 to 1.27)               |                                                                                                           |
|                           |                             |                                      |                                                 |          |    |    | BMI, age ≥75 years                  | 20-24.9<br>25-29.9<br>≥30                | 1.00<br>0.88 (0.76 to 1.02)<br>0.80 (0.64 to 1.01)               |                                                                                                           |
|                           |                             |                                      |                                                 |          |    |    | BMI, none to passive smoke exposure | 20-24.9<br>25-29.9<br>≥30                | 1.00<br>0.82 (0.69 to 0.98)<br>0.86 (0.68 to 1.08)               |                                                                                                           |
|                           |                             |                                      |                                                 |          |    |    | BMI, light to high smoking exposure | 20-24.9<br>25-29.9<br>≥30                | 1.00<br>0.99 (0.85 to 1.16)<br>1.02 (0.83 to 1.26)               |                                                                                                           |
|                           |                             |                                      |                                                 |          |    |    | BMI, all                            | 20-24.9<br>25-29.9<br>≥30                | 1.00<br>0.89 (0.80 to 0.99)<br>0.83 (0.71 to 0.97)               | + prevalent disease                                                                                       |
|                           |                             |                                      |                                                 |          |    |    | BMI, men                            | 20-24.9<br>25-29.9<br>≥30                | 1.00<br>0.91 (0.78 to 1.06)<br>0.77 (0.61 to 0.97)               |                                                                                                           |
|                           |                             |                                      |                                                 |          |    |    | BMI, women                          | 20-24.9<br>25-29.9<br>≥30                | 1.00<br>0.85 (0.71 to 1.01)<br>0.88 (0.71 to 1.10)               |                                                                                                           |
|                           |                             |                                      |                                                 |          |    |    | BMI, age 65-74 years                | 20-24.9<br>25-29.9<br>≥30                | 1.00<br>0.91 (0.76 to 1.09)<br>0.83 (0.66 to 1.04)               |                                                                                                           |
|                           |                             |                                      |                                                 |          |    |    | BMI, age ≥75 years                  | 20-24.9<br>25-29.9<br>≥30                | 1.00<br>0.89 (0.76 to 1.03)<br>0.73 (0.58 to 0.92)               |                                                                                                           |
|                           |                             |                                      |                                                 |          |    |    | BMI, none to passive smoke          | 20-24.9                                  | 1.00                                                             |                                                                                                           |



|                               |                                                                  |                                                                                                    |                                                                                         |          |                                                                                      |                                                             |                                                                                                                                                                |                                                                                                                                       |                                                                                                                                                                                                          |                                                                                                                                                                                                             |
|-------------------------------|------------------------------------------------------------------|----------------------------------------------------------------------------------------------------|-----------------------------------------------------------------------------------------|----------|--------------------------------------------------------------------------------------|-------------------------------------------------------------|----------------------------------------------------------------------------------------------------------------------------------------------------------------|---------------------------------------------------------------------------------------------------------------------------------------|----------------------------------------------------------------------------------------------------------------------------------------------------------------------------------------------------------|-------------------------------------------------------------------------------------------------------------------------------------------------------------------------------------------------------------|
|                               |                                                                  |                                                                                                    |                                                                                         |          |                                                                                      |                                                             | exposure<br>BMI, light to high smoking exposure                                                                                                                | 25-29.9<br>≥30<br>20-24.9<br>25-29.9<br>≥30                                                                                           | 0.79 (0.67 to 0.94)<br>0.79 (0.62 to 0.99)<br>1.00<br>0.96 (0.82 to 1.12)<br>0.88 (0.71 to 1.09)                                                                                                         |                                                                                                                                                                                                             |
| Sai XY et al, 2007, China     | Xi'an male veterans                                              | 1987 – 2005, 18 years follow-up                                                                    | 1268 retired military men, age ≥55 years: 491 deaths                                    | Measured | No                                                                                   | No                                                          | BMI                                                                                                                                                            | <18.5<br>18.5-23.9<br>24-27.9<br>≥28                                                                                                  | 2.03 (1.33-3.11)<br>1.00<br>1.03 (0.85-1.25)<br>1.20 (0.90-1.62)                                                                                                                                         | Age, SBP, cigarettes per day, duration of smoking, age of starting smoking total cholesterol, TG, alcohol, exercise, prevalent cancer, stroke, diabetes, CHD, hypertension, COPD, cerebral arteriosclerosis |
| Greenberg JA et al, 2007, USA | Atherosclerosis Risk in Communities Study                        | 1993-1995 – 1996-1998, 5.3 years follow-up                                                         | 12457 men and women, age 51-70 years: 606 deaths                                        | Measured | Exclusion of subjects ever smokers, MI, HF, stroke, DM, cancer, chronic lung disease | No                                                          | BMI, no correction for regression dilution<br><br>BMI, correction for regression dilution<br><br>BMI, correction for regression dilution and reverse causation | 18.5-<25<br>25-<30<br>30-<35<br>≥35<br>18.5-<25<br>25-<30<br>30-<35<br>≥35<br>18.5-<25<br>25-<30<br>30-<35<br>≥35                     | 1.00<br>0.88 (0.72-1.08)<br>1.14 (0.91-1.44)<br>1.24 (0.93-1.66)<br>1.00<br>1.00 (0.82-1.23)<br>1.31 (1.04-1.66)<br>1.54 (1.14-2.08)<br>1.00<br>2.07 (1.01-4.24)<br>2.71 (1.25-5.89)<br>4.02 (1.72-9.43) | Age, sex, race, smoking status, alcohol                                                                                                                                                                     |
| Al Snih et al, 2007, USA      | Established Populations for Epidemiologic Studies of the Elderly | 1982-1993 – NA, 7 years follow-up                                                                  | 12725 men and women, age ≥65 years: 3122 deaths                                         | Measured | Subjects with limitation in activities of daily living                               | No                                                          | BMI                                                                                                                                                            | <18.5<br>18.5-<25.0<br>25.0-<30.0<br>30.0-<35.0<br>35.0-<40.0<br>≥40.0                                                                | 1.53 (1.31-1.80)<br>1.00<br>0.78 (0.72-0.85)<br>0.80 (0.72-0.90)<br>1.02 (0.84-1.24)<br>1.13 (0.79-1.60)                                                                                                 | Age, sex                                                                                                                                                                                                    |
| Flegal KM et al, 2007, USA    | National Health and Nutrition Examination Survey 1, 2 and 3      | NHANES 1: 1971-1975 – 1992, ~19 years follow-up<br>NHANES 2: 1976-1980 – 1992, ~14 years follow-up | 52590 men and women, age ≥25 years: 8418 deaths<br><br>19547 never smokers: 2412 deaths | Measured | Prevalent cancers and CVD excluded in sensitivity analyses                           | First 3 years of follow-up excluded in sensitivity analyses | BMI, age 25-59 years<br><br>BMI, age 25-59 years, excluded cancer and CVD<br><br>BMI, age 25-59 years, excluded cancer and CVD                                 | <18.5<br>18.5-<25<br>25.0-<30.0<br>30.0-<35.0<br>≥35.0<br><18.5<br>18.5-<25<br>25.0-<30.0<br>30.0-<35.0<br>≥35.0<br><18.5<br>18.5-<25 | 1.38 (0.82-2.32)<br>1.00<br>0.83 (0.65-1.06)<br>1.20 (0.84-1.72)<br>1.83 (1.27-2.62)<br>1.64 (0.94-2.88)<br>1.00<br>0.89 (0.69-1.16)<br>1.06 (0.73-1.53)<br>2.05 (1.39-3.02)<br>1.54 (0.33-7.06)<br>1.00 | Sex, smoking status, racial/ethnic group, alcohol                                                                                                                                                           |

|  |  |                                                                |  |  |  |  |                                                                                                     |                                                        |                                                                                      |  |
|--|--|----------------------------------------------------------------|--|--|--|--|-----------------------------------------------------------------------------------------------------|--------------------------------------------------------|--------------------------------------------------------------------------------------|--|
|  |  | NHANES<br>3: 1988-<br>1994 –<br>2000, ~9<br>years<br>follow-up |  |  |  |  | and ever smokers                                                                                    | 25.0-<30.0<br>30.0-<35.0<br>≥35.0                      | 0.73 (0.40-1.35)<br>0.86 (0.49-1.50)<br>1.39 (0.81-2.41)                             |  |
|  |  |                                                                |  |  |  |  | BMI, age 25-59 years,<br>excluded cancer and CVD,<br>ever smokers and first 3 years<br>of follow-up | <18.5<br>18.5-<25<br>25.0-<30.0<br>30.0-<35.0<br>≥35.0 | 0.77 (0.22-2.66)<br>1.00<br>0.83 (0.42-1.65)<br>0.80 (0.44-1.43)<br>1.62 (0.90-2.90) |  |
|  |  |                                                                |  |  |  |  | BMI, age 60-69 years                                                                                | <18.5<br>18.5-<25<br>25.0-<30.0<br>30.0-<35.0<br>≥35.0 | 2.30 (1.70-3.13)<br>1.00<br>0.95 (0.80-1.13)<br>1.13 (0.89-1.42)<br>1.63 (1.16-2.30) |  |
|  |  |                                                                |  |  |  |  | BMI, age 60-69 years,<br>excluded cancer and CVD                                                    | <18.5<br>18.5-<25<br>25.0-<30.0<br>30.0-<35.0<br>≥35.0 | 2.28 (1.52-3.43)<br>1.00<br>0.95 (0.77-1.15)<br>1.15 (0.90-1.48)<br>1.80 (1.16-2.81) |  |
|  |  |                                                                |  |  |  |  | BMI, age 60-69 years,<br>excluded cancer and CVD<br>and ever smokers                                | <18.5<br>18.5-<25<br>25.0-<30.0<br>30.0-<35.0<br>≥35.0 | 3.34 (1.26-8.80)<br>1.00<br>0.67 (0.45-1.00)<br>1.29 (0.85-1.96)<br>2.18 (1.24-3.82) |  |
|  |  |                                                                |  |  |  |  | BMI, age 60-69 years,<br>excluded cancer and CVD,<br>ever smokers and first 3 years<br>of follow-up | <18.5<br>18.5-<25<br>25.0-<30.0<br>30.0-<35.0<br>≥35.0 | 1.85 (0.70-4.89)<br>1.00<br>0.71 (0.46-1.11)<br>1.36 (0.84-2.19)<br>2.47 (1.37-4.45) |  |
|  |  |                                                                |  |  |  |  | BMI, age ≥70 years                                                                                  | <18.5<br>18.5-<25<br>25.0-<30.0<br>30.0-<35.0<br>≥35.0 | 1.69 (1.38-2.07)<br>1.00<br>0.91 (0.83-1.01)<br>1.03 (0.91-1.17)<br>1.17 (0.94-1.47) |  |
|  |  |                                                                |  |  |  |  | BMI, age ≥70 years, excluded<br>cancer and CVD                                                      | <18.5<br>18.5-<25<br>25.0-<30.0<br>30.0-<35.0<br>≥35.0 | 1.73 (1.38-2.16)<br>1.00<br>0.86 (0.77-0.97)<br>1.05 (0.91-1.21)<br>1.16 (0.91-1.48) |  |
|  |  |                                                                |  |  |  |  | BMI, age ≥70 years, excluded<br>cancer and CVD and ever<br>smokers                                  | <18.5<br>18.5-<25<br>25.0-<30.0<br>30.0-<35.0<br>≥35.0 | 1.68 (1.19-2.37)<br>1.00<br>0.83 (0.70-0.99)<br>1.14 (0.93-1.41)<br>1.07 (0.81-1.42) |  |

|                                   |                                                                |                                      |                                                                                                                                                        |          |                                                                                                                                                     |                                                                                                        |                                                                                                                         |                                                                                                                                                                                                                                              |                                                                                                                                                                                                                                                                                                                                                             |                                                                                                                                                                                                                                                                      |
|-----------------------------------|----------------------------------------------------------------|--------------------------------------|--------------------------------------------------------------------------------------------------------------------------------------------------------|----------|-----------------------------------------------------------------------------------------------------------------------------------------------------|--------------------------------------------------------------------------------------------------------|-------------------------------------------------------------------------------------------------------------------------|----------------------------------------------------------------------------------------------------------------------------------------------------------------------------------------------------------------------------------------------|-------------------------------------------------------------------------------------------------------------------------------------------------------------------------------------------------------------------------------------------------------------------------------------------------------------------------------------------------------------|----------------------------------------------------------------------------------------------------------------------------------------------------------------------------------------------------------------------------------------------------------------------|
|                                   |                                                                |                                      |                                                                                                                                                        |          |                                                                                                                                                     |                                                                                                        | BMI, age $\geq 70$ years, excluded cancer and CVD, ever smokers and first 3 years of follow-up                          | <18.5<br>18.5-<25<br>25.0-<30.0<br>30.0-<35.0<br>$\geq 35.0$                                                                                                                                                                                 | 1.85 (1.28-2.68)<br>1.00<br>0.84 (0.71-1.00)<br>1.16 (0.96-1.42)<br>1.16 (0.85-1.56)                                                                                                                                                                                                                                                                        |                                                                                                                                                                                                                                                                      |
| Mazza A et al, 2007, Italy        | The Experience of Cardiovascular Study in the Elderly (CASTEL) | NA-NA, 12 years follow-up            | 3282 men and women, age 65-96 years: 1599 deaths<br><br>441 never smokers: 224 deaths                                                                  | Measured | No                                                                                                                                                  | First two years of follow-up excluded in sensitivity analyses                                          | BMI, men, all<br><br>BMI, excluding early deaths<br><br>BMI, excluding current smokers<br><br>BMI, excluding ex-smokers | <22.7<br>22.7-24.9<br>25.0-26.5<br>26.6-29.0<br>>29.0<br><br><22.7<br>22.7-24.9<br>25.0-26.5<br>26.6-29.0<br>>29.0<br><br><22.7<br>22.7-24.9<br>25.0-26.5<br>26.6-29.0<br>>29.0<br><br><22.7<br>22.7-24.9<br>25.0-26.5<br>26.6-29.0<br>>29.0 | 1.63 (1.23-2.71)<br>1.28 (0.92-1.73)<br>1.20 (0.85-1.67)<br>1.16 (0.82-1.32)<br>1.00<br>1.54 (1.15-2.18)<br>1.17 (0.94-1.78)<br>1.24 (0.96-1.44)<br>1.21 (0.78-1.31)<br>1.00<br>1.52 (1.10-2.00)<br>1.20 (0.84-1.42)<br>1.10 (0.92-1.54)<br>1.10 (0.88-1.61)<br>1.00<br>1.33 (1.16-2.2)<br>1.20 (0.92-1.55)<br>1.20 (0.78-1.34)<br>1.10 (0.79-1.36)<br>1.00 | Age, COPD, cigarette smoking status, duration of smoking, alcohol, serum total cholesterol, history of CVD, arterial hypertension, diabetes, serum creatinine                                                                                                        |
| Simpson JA et al, 2007, Australia | Melbourne Collaborative Cohort Study                           | 1990-1994 – 2003, 11 years follow-up | 16969 men and 24344 women, age 27-75 years: 2822 deaths<br><br>23485 never smokers: NA<br><br>13135 former smokers: NA<br><br>4676 current smokers: NA | Measured | Excluded subjects with history of angina, heart attack, diabetes, stroke, cancer in sensitivity analyses (results were unchanged, but not reported) | Excluded first 2 years of follow-up in sensitivity analyses (results were unchanged, but not reported) | BMI, men<br><br>BMI, women<br><br>BMI, men, all<br><br>BMI, women, all                                                  | <24.3<br>24.3-<26.1<br>26.1-<27.7<br>27.7-<29.9<br>$\geq 29.9$<br><br><22.7<br>22.7-<24.8<br>24.8-<27.1<br>27.1-<30.4<br>$\geq 30.4$<br><br><23<br>23-24.9<br>25-27.4<br>27.5-29.9<br>$\geq 30$<br><br><23<br>23-24.9<br>25-27.4             | 1.2 (1.0, 1.4)<br>1.0<br>1.0 (0.9, 1.2)<br>1.0 (0.9, 1.2)<br>1.2 (1.0, 1.4)<br>1.2 (1.0, 1.5)<br>1.0<br>0.9 (0.7, 1.1)<br>0.9 (0.8, 1.1)<br>1.1 (0.9, 1.3)<br>1.3 (1.1-1.6)<br>1.0<br>0.9 (0.8-1.1)<br>1.0 (0.8-1.1)<br>1.1 (1.0-1.3)<br>1.2 (1.0-1.5)<br>1.0<br>0.8 (0.7-1.0)                                                                              | Age at attendance, country of birth, physical activity, alcohol intake, education, smoking status, living alone (men only), and family history of heart attack (men only); and stratified by "previous history of heart attack, angina, diabetes, stroke, and cancer |

|                             |                                  |                                             |                                                         |                                |    |    |                             |                                                                  |                                                                                                           |                                               |
|-----------------------------|----------------------------------|---------------------------------------------|---------------------------------------------------------|--------------------------------|----|----|-----------------------------|------------------------------------------------------------------|-----------------------------------------------------------------------------------------------------------|-----------------------------------------------|
|                             |                                  |                                             |                                                         |                                |    |    | BMI, men, never smokers     | 27.5-29.9<br>≥30<br><23<br>23-24.9<br>25-27.4<br>27.5-29.9<br>30 | 0.9 (0.8-1.2)<br>1.1 (0.9-1.3)<br>0.9 (0.6-1.3)<br>1.0<br>1.1 (0.8-1.4)<br>0.9 (0.7-1.2)<br>1.2 (0.9-1.6) |                                               |
|                             |                                  |                                             |                                                         |                                |    |    | BMI, women, never smoker    | <23<br>23-24.9<br>25-27.4<br>27.5-29.9<br>≥30                    | 1.1 (0.9-1.4)<br>1.0<br>0.8 (0.6-1.1)<br>1.0 (0.8-1.3)<br>1.2 (0.9-1.5)                                   |                                               |
|                             |                                  |                                             |                                                         |                                |    |    | BMI, men, former smokers    | <23<br>23-24.9<br>25-27.4<br>27.5-29.9<br>≥30                    | 1.3 (1.0-1.7)<br>1.0<br>0.9 (0.8-1.2)<br>1.0 (0.8-1.2)<br>1.1 (0.9-1.4)                                   |                                               |
|                             |                                  |                                             |                                                         |                                |    |    | BMI, women, former smokers  | <23<br>23-24.9<br>25-27.4<br>27.5-29.9<br>≥30                    | 1.3 (0.9-1.9)<br>1.0<br>0.8 (0.6-1.2)<br>0.9 (0.6-1.4)<br>1.1 (0.7-1.5)                                   |                                               |
|                             |                                  |                                             |                                                         |                                |    |    | BMI, men, current smokers   | <23<br>23-24.9<br>25-27.4<br>27.5-29.9<br>≥30                    | 1.1 (0.7-1.5)<br>1.8 (1.2-2.6)<br>1.0<br>0.7 (0.5-1.0)<br>1.1 (0.7-1.5)                                   |                                               |
|                             |                                  |                                             |                                                         |                                |    |    | BMI, women, current smokers | <23<br>23-24.9<br>25-27.4<br>27.5-29.9<br>≥30                    | 1.4 (0.9-2.1)<br>1.0<br>0.8 (0.5-1.3)<br>0.7 (0.4-1.2)<br>0.7 (0.4-1.1)                                   |                                               |
| Locher JL et al, 2007, USA  | UAB Study of Aging               | 1999-2001 – 2002-2004, 3 years follow-up    | 983 men and women, age ≥65 years: 147 deaths            | Measured (91% of participants) | No | No | BMI                         | <18.5<br>18.2-25.0<br>25-30<br>30-35<br>>35                      | 2.18 (1.02-4.66)<br>1.00<br>1.25 (0.83-1.87)<br>0.83 (0.49-1.42)<br>0.92 (0.47-1.80)                      | Age, sex, race, smoking status, comorbidities |
| Fujino Y et al, 2007, Japan | Japan Collaborative Cohort Study | 1988-1990 – 1999-2003, 12.7 years follow-up | 110792 men and women, age 40-79 years: 9368/6139 deaths | Self-reported                  | No | No | BMI, men                    | <18.5<br>18.5-24<br>25-29<br>≥30                                 | 1.46 (1.37-1.56)<br>1.00<br>0.92 (0.88-0.99)<br>1.07 (0.87-1.33)                                          | Age, study area                               |
|                             |                                  |                                             |                                                         |                                |    |    | BMI, women                  | <18.5<br>18.5-24                                                 | 1.60 (1.48-1.73)<br>1.00                                                                                  |                                               |

|                            |                          |                                       |                                                                                                                                                                   |               |                                                                                                 |                                                             |                                                           |                                                                  |                                                                                                          |                                        |
|----------------------------|--------------------------|---------------------------------------|-------------------------------------------------------------------------------------------------------------------------------------------------------------------|---------------|-------------------------------------------------------------------------------------------------|-------------------------------------------------------------|-----------------------------------------------------------|------------------------------------------------------------------|----------------------------------------------------------------------------------------------------------|----------------------------------------|
|                            |                          |                                       |                                                                                                                                                                   |               |                                                                                                 |                                                             |                                                           | 25-29<br>≥30                                                     | 1.05 (0.98-1.12)<br>1.50 (1.29-1.74)                                                                     |                                        |
| Gelber RP et al, 2007, USA | Physicians' Health Study | 1982-1983 – 1988, 5.7 years follow-up | 99253 men, age 40-84 years: 5438 deaths<br><br>44276 never smokers: 1659 deaths<br><br>42270 former smokers: 2702 deaths<br><br>12048 current smokers: 986 deaths | Self-reported | Prevalent myocardial infarction, stroke, cancer, liver disease excluded in sensitivity analyses | First 2 years of follow-up excluded in sensitivity analyses | BMI, all                                                  | <20<br>20.0-22.4<br>22.5-24.9<br>25.0-27.4<br>27.5-29.9<br>≥30.0 | 1.68 (1.45-1.93)<br>1.13 (1.05-1.23)<br>1.00<br>1.01 (0.94-1.08)<br>1.12 (1.01-1.23)<br>1.35 (1.21-1.52) | Age, alcohol intake, physical activity |
|                            |                          |                                       |                                                                                                                                                                   |               |                                                                                                 |                                                             | BMI, never smokers                                        | <20<br>20.0-22.4<br>22.5-24.9<br>25.0-27.4<br>27.5-29.9<br>≥30.0 | 1.08 (0.79-1.47)<br>1.04 (0.90-1.21)<br>1.00<br>1.03 (0.91-1.17)<br>1.14 (0.95-1.36)<br>1.39 (1.13-1.71) |                                        |
|                            |                          |                                       |                                                                                                                                                                   |               |                                                                                                 |                                                             | BMI, former smokers                                       | <20<br>20.0-22.4<br>22.5-24.9<br>25.0-27.4<br>27.5-29.9<br>≥30.0 | 1.56 (1.25-1.95)<br>1.17 (1.05-1.31)<br>1.00<br>0.96 (0.87-1.06)<br>1.14 (1.00-1.31)<br>1.30 (1.11-1.52) |                                        |
|                            |                          |                                       |                                                                                                                                                                   |               |                                                                                                 |                                                             | BMI, current smokers                                      | <20<br>20.0-22.4<br>22.5-24.9<br>25.0-27.4<br>27.5-29.9<br>≥30.0 | 2.42 (1.87-3.13)<br>1.15 (0.95-1.38)<br>1.00<br>1.07 (0.90-1.26)<br>0.99 (0.77-1.27)<br>1.43 (1.09-1.87) |                                        |
|                            |                          |                                       |                                                                                                                                                                   |               |                                                                                                 |                                                             | BMI, without prior disease                                | <20<br>20.0-22.4<br>22.5-24.9<br>25.0-27.4<br>27.5-29.9<br>≥30.0 | 1.63 (1.31-2.02)<br>1.09 (0.98-1.22)<br>1.00<br>1.10 (1.00-1.21)<br>1.20 (1.05-1.37)<br>1.57 (1.36-1.82) |                                        |
|                            |                          |                                       |                                                                                                                                                                   |               |                                                                                                 |                                                             | BMI, with prior disease                                   | <20<br>20.0-22.4<br>22.5-24.9<br>25.0-27.4<br>27.5-29.9<br>≥30.0 | 1.62 (1.33-1.96)<br>1.15 (1.03-1.29)<br>1.00<br>0.89 (0.80-0.99)<br>0.99 (0.85-1.14)<br>1.08 (0.90-1.29) |                                        |
|                            |                          |                                       |                                                                                                                                                                   |               |                                                                                                 |                                                             | BMI, with prior disease, ever smokers, ≤2 years follow-up | <20<br>20.0-22.4<br>22.5-24.9<br>25.0-27.4<br>27.5-29.9          | 1.68 (1.45-1.95)<br>1.15 (1.06-1.25)<br>1.00<br>0.97 (0.90-1.04)<br>1.03 (0.92-1.14)                     |                                        |





|                                        |                       |                                       |                                                                                        |               |                                                                                                                          |                                                                              |                                                                                                    |                                                                                                                                                      |                                                                                                                                                                                                                                  |                                                                                                    |
|----------------------------------------|-----------------------|---------------------------------------|----------------------------------------------------------------------------------------|---------------|--------------------------------------------------------------------------------------------------------------------------|------------------------------------------------------------------------------|----------------------------------------------------------------------------------------------------|------------------------------------------------------------------------------------------------------------------------------------------------------|----------------------------------------------------------------------------------------------------------------------------------------------------------------------------------------------------------------------------------|----------------------------------------------------------------------------------------------------|
|                                        |                       |                                       |                                                                                        |               |                                                                                                                          |                                                                              |                                                                                                    | 28.0-<30.0<br>30.0-<35.0<br>≥35.0                                                                                                                    | 1.30 (1.07-1.58)<br>1.38 (1.14-1.67)<br>1.60 (1.20-2.13)                                                                                                                                                                         |                                                                                                    |
| Hozawa A et al, 2008, Japan            | NIPPON DATA80         | 1980 – 1999, 19 years follow-up       | 8924 men and women, age 30-92 years: 1718 deaths<br><br>3712 never smokers: 329 deaths | Measured      | Prevalent CVD excluded                                                                                                   | First 5 years of follow-up excluded in sensitivity analysis                  | BMI, all<br><br><br><br><br><br>BMI, never smokers, healthy subjects                               | <18.5<br>18.5-21<br>21-23<br>23-25<br>25-27<br>≥27<br><br><18.5<br>18.5-21<br>21-23<br>23-25<br>25-27<br>≥27                                         | 1.39 (1.19-1.62)<br>1.17 (1.03-1.33)<br>1.07 (0.94-1.22)<br>1.00<br>1.06 (0.90-1.26)<br>1.19 (1.00-1.42)<br>2.01 (1.32-3.05)<br>1.26 (0.92-1.72)<br>1.07 (0.79-1.44)<br>1.00<br>1.46 (1.05-2.04)<br>1.61 (1.16-2.24)             | Age, sex, smoking status and cigarettes per day, alcohol                                           |
| Luchsinger JA et al, 2008, USA         | Northern Manhattan    | 1992-1994 – 2003, 6.9 years follow-up | 1372 men and women, age ≥65 years: 479 deaths                                          | Measured      | No                                                                                                                       | First 2 years excluded in sensitivity analyses, results only partly reported | BMI                                                                                                | <23<br>23-26.1<br>26.2-29.4<br>>29.4                                                                                                                 | 1.5 (1.1-2.9)<br>1.0<br>1.2 (0.9-1.6)<br>1.2 (0.9-1.5)                                                                                                                                                                           | Age, sex, education, ethnic group, cancer, current smoking status, dementia                        |
| Orsini N et al, 2008, Sweden           | Cohort of Swedish Men | 1997-1998 – 2007, 9.7 years follow-up | 37633 men, age 45-79 years: 4086 deaths                                                | Self-reported | Prevalent cancer, cardiovascular disease, diabetes were excluded                                                         | No                                                                           | BMI, high physical activity<br><br>BMI, medium physical activity<br><br>BMI, low physical activity | <25.0<br>25.0-29.9<br>≥30.0<br><br><25.0<br>25.0-29.9<br>≥30.0<br><br><25.0<br>25.0-29.9<br>≥30.0                                                    | 1.00<br>1.08 (0.95-1.22)<br>1.43 (1.13-1.80)<br>1.18 (1.04-1.34)<br>1.08 (0.95-1.22)<br>1.47 (1.17-1.87)<br>1.53 (1.36-1.72)<br>1.32 (1.17-1.48)<br>1.73 (1.44-2.06)                                                             | Age, smoking status, pack-years of smoking, alcohol, education, parental history of CHD and cancer |
| Kivimaki M et al, 2008, United Kingdom | Whitehall Study       | 1967-1970 - 2005, 35 years follow-up  | 18860 men, age 40-69 years: 13498 deaths<br>7865 healthy never smokers: 4766 deaths    | Measured      | Prevalent cardiovascular disease, hypertension, heart disease, ischemia, intermittent claudication, dyspnea, bronchitis, | First 5 years of follow-up excluded in sensitivity analyses                  | BMI, all                                                                                           | <18.5<br>18.5-18.9<br>19.0-19.9<br>20.0-20.9<br>21.0-21.9<br>22.0-22.9<br>23.0-23.9<br>24.0-24.9<br>25.0-25.9<br>26.0-26.9<br>27.0-27.9<br>28.0-28.9 | 1.54 (1.33-1.79)<br>1.25 (1.03-1.52)<br>1.13 (1.01-1.26)<br>1.13 (1.04-1.24)<br>1.09 (1.01-1.19)<br>0.95 (0.89-1.03)<br>1.00<br>0.98 (0.92-1.05)<br>1.04 (0.98-1.11)<br>1.04 (0.98-1.12)<br>1.12 (1.04-1.21)<br>1.22 (1.11-1.33) | Age                                                                                                |



|                                      |             |                                              |                                                                                                                                     |          |                                         |                                                                               |                                                                                                                                           |                                                                                                                                                                                                                                                                                |                                                                                                                                                                                                                                                                                                                                                                                                                                          |                                            |
|--------------------------------------|-------------|----------------------------------------------|-------------------------------------------------------------------------------------------------------------------------------------|----------|-----------------------------------------|-------------------------------------------------------------------------------|-------------------------------------------------------------------------------------------------------------------------------------------|--------------------------------------------------------------------------------------------------------------------------------------------------------------------------------------------------------------------------------------------------------------------------------|------------------------------------------------------------------------------------------------------------------------------------------------------------------------------------------------------------------------------------------------------------------------------------------------------------------------------------------------------------------------------------------------------------------------------------------|--------------------------------------------|
|                                      |             |                                              |                                                                                                                                     |          | diabetes,<br>unexplained<br>weight loss |                                                                               | BMI, healthy never smokers                                                                                                                | 29.0-29.9<br>30.0-30.9<br>31.0-31.9<br>32.0-32.9<br>≥33.0<br><18.5<br>18.5-18.9<br>19.0-19.9<br>20.0-20.9<br>21.0-21.9<br>22.0-22.9<br>23.0-23.9<br>24.0-24.9<br>25.0-25.9<br>26.0-26.9<br>27.0-27.9<br>28.0-28.9<br>29.0-29.9<br>30.0-30.9<br>31.0-31.9<br>32.0-32.9<br>≥33.0 | 1.18 (1.06-1.30)<br>1.28 (1.12-1.46)<br>1.47 (1.25-1.71)<br>1.73 (1.40-2.14)<br>1.85 (1.57-2.18)<br>1.26 (0.89-1.79)<br>1.47 (0.98-2.21)<br>1.06 (0.86-1.31)<br>0.95 (0.81-1.13)<br>1.02 (0.88-1.17)<br>0.96 (0.85-1.08)<br>1.00<br>1.06 (0.95-1.18)<br>1.13 (1.01-1.25)<br>1.10 (0.98-1.23)<br>1.20 (1.06-1.36)<br>1.40 (1.21-1.62)<br>1.21 (1.02-1.44)<br>1.54 (1.23-1.91)<br>1.59 (1.22-2.06)<br>1.90 (1.31-2.75)<br>2.32 (1.73-3.10) |                                            |
| Pednekar MS<br>et al, 2008,<br>India | Mumbai City | 1991-97 –<br>2003, 5.2<br>years<br>follow-up | 148173 men<br>and women,<br>age ≥35 years:<br>13261 deaths<br><br>Never<br>smokers or<br>smokeless<br>tobacco users:<br>3255 deaths | Measured | No                                      | First 2 years<br>of follow-up<br>was excluded<br>in a sensitivity<br>analysis | BMI, men, never user of<br>tobacco<br><br>BMI, smokeless tobacco user<br><br>BMI, men, smoker<br><br>BMI, women, never user of<br>tobacco | <16.0<br>16.0-<17.0<br>17.0-<18.5<br>18.5-<25.0<br>25.0-<30.0<br>≥30.0<br><16.0<br>16.0-<17.0<br>17.0-<18.5<br>18.5-<25.0<br>25.0-<30.0<br>≥30.0<br><16.0<br>16.0-<17.0<br>17.0-<18.5<br>18.5-<25.0<br>25.0-<30.0<br>≥30.0<br><16.0<br>16.0-<17.0<br>17.0-<18.5                | 2.68 (2.26-3.19)<br>1.50 (1.21-1.86)<br>1.37 (1.16-1.62)<br>1.10 (0.98-1.23)<br>1.00<br>1.34 (1.05-1.71)<br>2.75 (2.38-3.19)<br>1.71 (1.44-2.03)<br>1.53 (1.33-1.77)<br>1.18 (1.06-1.32)<br>1.02 (0.86-1.17)<br>1.17 (0.90-1.51)<br>3.36 (2.93-3.85)<br>2.38 (2.04-2.78)<br>2.02 (1.76-2.31)<br>1.61 (1.44-1.80)<br>1.38 (1.20-1.59)<br>1.56 (1.21-2.01)<br>2.70 (2.12-3.45)<br>1.80 (1.29-2.53)<br>1.37 (1.04-1.80)                     | Age, education, religion,<br>mother tongue |

|                                |                    |                                     |                                                              |          |    |                                                                   |                                                                                                                                          |                                                                                                                                                                                                                                                                                                      |                                                                                                                                                                                                                                                                                                                                                                                                                                              |                                                  |
|--------------------------------|--------------------|-------------------------------------|--------------------------------------------------------------|----------|----|-------------------------------------------------------------------|------------------------------------------------------------------------------------------------------------------------------------------|------------------------------------------------------------------------------------------------------------------------------------------------------------------------------------------------------------------------------------------------------------------------------------------------------|----------------------------------------------------------------------------------------------------------------------------------------------------------------------------------------------------------------------------------------------------------------------------------------------------------------------------------------------------------------------------------------------------------------------------------------------|--------------------------------------------------|
|                                |                    |                                     |                                                              |          |    |                                                                   |                                                                                                                                          | 18.5-<25.0<br>25.0-<30.0<br>≥30.0<br><16.0<br>16.0-<17.0<br>17.0-<18.5<br>18.5-<25.0<br>25.0-<30.0<br>≥30.0                                                                                                                                                                                          | 1.07 (0.90-1.26)<br>1.00<br>1.09 (0.84-1.42)<br>2.22 (1.86-2.64)<br>1.55 (1.25-1.91)<br>1.48 (1.23-1.77)<br>1.20 (1.03-1.40)<br>1.04 (0.87-1.24)<br>1.14 (0.89-1.46)                                                                                                                                                                                                                                                                         |                                                  |
| Pednekar MS et al, 2008, India | Mumbai City        | 1991-97 – 2003, 5.2 years follow-up | 148173 men and women, age ≥35 years: 13261 deaths            | Measured | No | First 2 years of follow-up was excluded in a sensitivity analysis | BMI, women<br><br>BMI, men<br><br>BMI, women, excluding first 2 years of follow-up<br><br>BMI, men, excluding first 2 years of follow-up | <16.0<br>16.0-<17.0<br>17.0-<18.5<br>18.5-<25.0<br>25.0-<30.0<br>≥30.0<br><16.0<br>16.0-<17.0<br>17.0-<18.5<br>18.5-<25.0<br>25.0-<30.0<br>≥30.0<br><16.0<br>16.0-<17.0<br>17.0-<18.5<br>18.5-<25.0<br>25.0-<30.0<br>≥30.0<br><16.0<br>16.0-<17.0<br>17.0-<18.5<br>18.5-<25.0<br>25.0-<30.0<br>≥30.0 | 1.94 (1.75-2.15)<br>1.38 (1.19-1.60)<br>1.24 (1.11-1.39)<br>1.00<br>0.89 (0.81-0.98)<br>0.97 (0.83-1.14)<br>2.24 (2.09-2.39)<br>1.45 (1.33-1.58)<br>1.27 (1.19-1.36)<br>1.00<br>0.87 (0.82-0.93)<br>1.05 (0.92-1.21)<br>1.83 (1.62-2.06)<br>1.36 (1.15-1.61)<br>1.15 (1.01-1.31)<br>1.00<br>0.89 (0.80-0.99)<br>0.90 (0.75-1.08)<br>1.92 (1.77-2.09)<br>1.38 (1.25-1.53)<br>1.26 (1.16-1.36)<br>1.00<br>0.90 (0.84-0.97)<br>1.13 (0.97-1.32) | Age, education, religion, mother tongue, tobacco |
| Matsuo T et al, 2008, Japan    | Ibaraki Prefecture | 1993-2003, 9.7/9.9 years follow-up  | 32060 men and 61916 women, age 40-79 years: 3930/3164 deaths | Measured | No | First 3 years of follow-up excluded in main analysis              | BMI, men, age 40-59 years<br><br>BMI, men, age 60-79 years                                                                               | <18.5<br>18.5-20.9<br>21.0-22.9<br>23.0-24.9<br>25.0-26.9<br>27.0-29.9<br>≥30.0<br><18.5<br>18.5-20.9<br>21.0-22.9                                                                                                                                                                                   | 2.05 (1.25-3.35)<br>1.16 (0.85-1.58)<br>1.00<br>1.09 (0.83-1.43)<br>1.02 (0.76-1.38)<br>1.08 (0.77-1.52)<br>1.54 (0.88-2.70)<br>1.58 (1.39-1.79)<br>1.17 (1.06-1.29)<br>1.00                                                                                                                                                                                                                                                                 | Age, alcohol, smoking status                     |

|                            |                               |                                       |                                                                                                                                                                                                                                      |          |                                                                                                                                         |                                                                   |                                                                                                                  |                                                                                                                                                                                                                    |                                                                                                                                                                                                                                                                                                                                              |                                                                                                                                    |
|----------------------------|-------------------------------|---------------------------------------|--------------------------------------------------------------------------------------------------------------------------------------------------------------------------------------------------------------------------------------|----------|-----------------------------------------------------------------------------------------------------------------------------------------|-------------------------------------------------------------------|------------------------------------------------------------------------------------------------------------------|--------------------------------------------------------------------------------------------------------------------------------------------------------------------------------------------------------------------|----------------------------------------------------------------------------------------------------------------------------------------------------------------------------------------------------------------------------------------------------------------------------------------------------------------------------------------------|------------------------------------------------------------------------------------------------------------------------------------|
|                            |                               |                                       |                                                                                                                                                                                                                                      |          |                                                                                                                                         |                                                                   |                                                                                                                  | 23.0-24.9<br>25.0-26.9<br>27.0-29.9<br>≥30.0<br><18.5<br>18.5-20.9<br>21.0-22.9<br>23.0-24.9<br>25.0-26.9<br>27.0-29.9<br>≥30.0<br><18.5<br>18.5-20.9<br>21.0-22.9<br>23.0-24.9<br>25.0-26.9<br>27.0-29.9<br>≥30.0 | 0.97 (0.88-1.07)<br>0.93 (0.83-1.05)<br>0.93 (0.80-1.08)<br>1.43 (1.08-1.89)<br>1.77 (1.09-2.88)<br>1.13 (0.82-1.55)<br>1.00<br>1.18 (0.89-1.56)<br>1.23 (0.90-1.68)<br>1.46 (1.04-2.05)<br>2.23 (1.46-3.42)<br>1.70 (1.46-1.99)<br>1.17 (1.04-1.33)<br>1.00<br>0.97 (0.87-1.10)<br>1.03 (0.91-1.17)<br>1.17 (1.02-1.33)<br>1.39 (1.14-1.69) |                                                                                                                                    |
| Zhang X et al, 2008, China | Shanghai Women's Health Study | 1996-2000 – 2007, 7.4 years follow-up | 74896 women, age 40-70 years: 2389 deaths<br>26055 women, age 51-70 years: 1187 deaths<br>19883 healthy, never smoking women without previous CVD, cancer, substantial weight loss, excluding first 3 years of follow-up: 486 deaths | Measured | Participants with previous CVD, cancer, substantial weight loss, and first 3 years of follow-up were excluded in a sensitivity analysis | First 3 years of follow-up was excluded in a sensitivity analysis | BMI, baseline, all age 51-70 years<br><br>BMI, baseline, healthy never smokers, excl. first 3 years of follow-up | <22.2<br>22.2-24.3<br>24.4-26.6<br>≥26.7<br><22.2<br>22.2-24.3<br>24.4-26.6<br>≥26.7                                                                                                                               | 1.00<br>0.84 (0.71-0.99)<br>1.01 (0.86-1.18)<br>1.11 (0.95-1.30)<br>1.00<br>1.13 (0.85-1.50)<br>1.40 (1.17-1.84)<br>1.61 (1.23-2.10)                                                                                                                                                                                                         | Age<br><br>Age, education, occupation, annual family income, menopausal status, HRT, exercise, alcohol, SFA, vegetables and fruits |



|                                         |                                            |                                           |                                                   |               |    |                                                              |                                                   |                                                                                        |                                                                                                                              |                                                      |
|-----------------------------------------|--------------------------------------------|-------------------------------------------|---------------------------------------------------|---------------|----|--------------------------------------------------------------|---------------------------------------------------|----------------------------------------------------------------------------------------|------------------------------------------------------------------------------------------------------------------------------|------------------------------------------------------|
|                                         |                                            |                                           |                                                   |               |    |                                                              | BMI, women                                        | $\geq 27.5$<br>$< 16$<br>16-18.4<br>18.5-22.9<br>23.0-24.9<br>25.0-27.4                | 0.89 (0.65-1.21)<br>1.20 (0.99-1.47)<br>1.12 (0.98-1.28)<br>1.00<br>0.87 (0.73-1.04)<br>1.11 (0.93-1.33)                     |                                                      |
|                                         |                                            |                                           |                                                   |               |    |                                                              | BMI, men, non-smokers                             | $\geq 27.5$<br>$< 16$<br>16-18.4<br>18.5-22.9<br>23.0-24.9<br>25.0-27.4                | 0.93 (0.75-1.15)<br>1.79 (1.22-2.63)<br>1.27 (1.01-1.60)<br>1.00<br>1.16 (0.92-1.46)<br>0.80 (0.59-1.09)                     |                                                      |
|                                         |                                            |                                           |                                                   |               |    |                                                              | BMI, women, non-smokers                           | $\geq 27.5$<br>$< 16$<br>16-18.4<br>18.5-22.9<br>23.0-24.9<br>25.0-27.4                | 0.97 (0.64-1.48)<br>1.21 (0.98-1.48)<br>1.11 (0.97-1.28)<br>1.00<br>0.87 (0.73-1.04)<br>1.11 (0.92-1.32)                     |                                                      |
|                                         |                                            |                                           |                                                   |               |    |                                                              | BMI, men, current smokers                         | $\geq 27.5$<br>$< 16$<br>16-18.4<br>18.5-22.9<br>23.0-24.9<br>25.0-27.4<br>$\geq 27.5$ | 0.93 (0.75-1.15)<br>1.12 (0.87-1.44)<br>1.06 (0.91-1.25)<br>1.00<br>0.79 (0.60-1.02)<br>0.98 (0.72-1.34)<br>0.92 (0.55-1.54) |                                                      |
| Ringback Weitoft GR et al, 2008, Sweden | Swedish Surveys of Living Conditions (ULF) | 1980-1981 – 1988-1989, 12 years follow-up | 23580 men and women, age 16-74 years: 2306 deaths | Self-reported | No | Excluding first 3 years of follow-up in sensitivity analyses | BMI, men                                          | $< 18.5$<br>18.5-24.9<br>25.0-29.9<br>$\geq 30.0$                                      | 2.4 (1.6-3.6)<br>1.0<br>1.0 (0.9-1.1)<br>1.5 (1.2-1.8)                                                                       | Age, smoking status, longstanding illness, education |
|                                         |                                            |                                           |                                                   |               |    | BMI, women                                                   | $< 18.5$<br>18.5-24.9<br>25.0-29.9<br>$\geq 30.0$ | 2.0 (1.5-2.7)<br>1.0<br>1.1 (1.0-1.3)<br>1.4 (1.1-1.7)                                 |                                                                                                                              |                                                      |
|                                         |                                            |                                           |                                                   |               |    | BMI, men, excluding first 3 years                            | $< 18.5$<br>18.5-24.9<br>25.0-29.9<br>$\geq 30.0$ | 2.3 (1.4-3.7)<br>1.0<br>1.1 (0.9-1.2)<br>1.4 (1.1-1.7)                                 |                                                                                                                              |                                                      |
|                                         |                                            |                                           |                                                   |               |    | BMI, women, excluding first 3 years                          | $< 18.5$<br>18.5-24.9<br>25.0-29.9<br>$\geq 30.0$ | 2.0 (1.4-2.8)<br>1.0<br>1.1 (0.9-1.3)<br>1.4 (1.1-1.7)                                 |                                                                                                                              |                                                      |

|                           |                                               |                                      |                                                                                                                                                                    |          |                                                                                       |    |                                                                                                                                                                                 |                                                                                                                                                                                                                                                                                                                                                                                                                                                                                                                                                                            |                                                                                                                                                                                                                                                                                                                                                                                                                                                                                                                                                                                                                                                                                                                                                                                                                                                                                  |                                                                                                                                      |
|---------------------------|-----------------------------------------------|--------------------------------------|--------------------------------------------------------------------------------------------------------------------------------------------------------------------|----------|---------------------------------------------------------------------------------------|----|---------------------------------------------------------------------------------------------------------------------------------------------------------------------------------|----------------------------------------------------------------------------------------------------------------------------------------------------------------------------------------------------------------------------------------------------------------------------------------------------------------------------------------------------------------------------------------------------------------------------------------------------------------------------------------------------------------------------------------------------------------------------|----------------------------------------------------------------------------------------------------------------------------------------------------------------------------------------------------------------------------------------------------------------------------------------------------------------------------------------------------------------------------------------------------------------------------------------------------------------------------------------------------------------------------------------------------------------------------------------------------------------------------------------------------------------------------------------------------------------------------------------------------------------------------------------------------------------------------------------------------------------------------------|--------------------------------------------------------------------------------------------------------------------------------------|
| Moore SC et al, 2008, USA | Breast Cancer Detection Demonstration Project | 1987-1989 – 1997, 10 years follow-up | 50186 women, age 40-93 years: 5201 deaths<br><br>25103 never smokers: 2715 deaths<br><br>16321 former smokers: 1567 deaths<br><br>6203 current smokers: 791 deaths | Measured | Prevalent coronary heart disease, diabetes or cancer excluded in sensitivity analyses | No | <p>BMI, all</p> <p>BMI, any chronic disease history</p> <p>BMI, no chronic disease history</p> <p>BMI, never smokers</p> <p>BMI, former smokers</p> <p>BMI, current smokers</p> | <p>15.0-18.4<br/>18.5-20.9<br/>21.0-23.4<br/>23.5-24.9<br/>25.0-27.4<br/>27.5-29.9<br/>30.0-34.9<br/>≥35.0</p> <p>15.0-18.4<br/>18.5-20.9<br/>21.0-23.4<br/>23.5-24.9<br/>25.0-27.4<br/>27.5-29.9<br/>30.0-34.9<br/>≥35.0</p> <p>15.0-18.4<br/>18.5-20.9<br/>21.0-23.4<br/>23.5-24.9<br/>25.0-27.4<br/>27.5-29.9<br/>30.0-34.9<br/>≥35.0</p> <p>15.0-18.4<br/>18.5-20.9<br/>21.0-23.4<br/>23.5-24.9<br/>25.0-27.4<br/>27.5-29.9<br/>30.0-34.9<br/>≥35.0</p> <p>15.0-18.4<br/>18.5-20.9<br/>21.0-23.4<br/>23.5-24.9<br/>25.0-27.4<br/>27.5-29.9<br/>30.0-34.9<br/>≥35.0</p> | <p>1.43 (1.19-1.72)<br/>1.07 (0.98-1.17)<br/>1.00<br/>1.10 (1.00-1.20)<br/>1.20 (1.11-1.31)<br/>1.23 (1.11-1.37)<br/>1.60 (1.44-1.77)<br/>1.92 (1.64-2.24)</p> <p>1.10 (0.74-1.65)<br/>1.21 (1.01-1.45)<br/>1.00<br/>1.29 (1.08-1.54)<br/>1.21 (1.02-1.42)<br/>1.34 (1.09-1.64)<br/>1.58 (1.29-1.92)<br/>1.68 (1.25-2.26)</p> <p>1.53 (1.25-1.88)<br/>1.04 (0.94-1.15)<br/>1.00<br/>1.04 (0.94-1.16)<br/>1.19 (1.08-1.31)<br/>1.17 (1.03-1.32)<br/>1.57 (1.38-1.77)<br/>1.93 (1.61-2.33)</p> <p>1.32 (0.99-1.75)<br/>1.07 (0.94-1.21)<br/>1.00<br/>1.09 (0.97-1.24)<br/>1.18 (1.05-1.32)<br/>1.28 (1.11-1.47)<br/>1.58 (1.38-1.82)<br/>1.94 (1.58-2.40)</p> <p>1.50 (1.07-2.09)<br/>1.05 (0.90-1.23)<br/>1.00<br/>1.13 (0.97-1.32)<br/>1.19 (1.02-1.38)<br/>1.13 (0.92-1.38)<br/>1.70 (1.40-2.06)<br/>1.65 (1.22-2.22)</p> <p>1.72 (1.22-2.43)<br/>1.19 (0.97-1.45)<br/>1.00</p> | Age, menopausal status, annual household income, education, race/ethnicity, smoking status and cigarettes per day, physical activity |
|---------------------------|-----------------------------------------------|--------------------------------------|--------------------------------------------------------------------------------------------------------------------------------------------------------------------|----------|---------------------------------------------------------------------------------------|----|---------------------------------------------------------------------------------------------------------------------------------------------------------------------------------|----------------------------------------------------------------------------------------------------------------------------------------------------------------------------------------------------------------------------------------------------------------------------------------------------------------------------------------------------------------------------------------------------------------------------------------------------------------------------------------------------------------------------------------------------------------------------|----------------------------------------------------------------------------------------------------------------------------------------------------------------------------------------------------------------------------------------------------------------------------------------------------------------------------------------------------------------------------------------------------------------------------------------------------------------------------------------------------------------------------------------------------------------------------------------------------------------------------------------------------------------------------------------------------------------------------------------------------------------------------------------------------------------------------------------------------------------------------------|--------------------------------------------------------------------------------------------------------------------------------------|



|                                 |                                                                                    |                                       |                                                           |               |                                                        |                                                      |                                                                                                                              |                                                                                                                                                                                                                                                  |                                                                                                                                                                                                                                                                                                                                                              |                           |
|---------------------------------|------------------------------------------------------------------------------------|---------------------------------------|-----------------------------------------------------------|---------------|--------------------------------------------------------|------------------------------------------------------|------------------------------------------------------------------------------------------------------------------------------|--------------------------------------------------------------------------------------------------------------------------------------------------------------------------------------------------------------------------------------------------|--------------------------------------------------------------------------------------------------------------------------------------------------------------------------------------------------------------------------------------------------------------------------------------------------------------------------------------------------------------|---------------------------|
| Korkeila M et al, 2009, Finland | Finnish Twin Cohort                                                                | 1975-1981 – 2003, 22 years follow-up  | 15494 men and women, age 24-60 years: 787/376 deaths      | Self-reported | Excluded chronic disease that could cause weight loss, | No                                                   | BMI, women<br><br>BMI, men                                                                                                   | <18.5<br>18.5-<22.0<br>22.0-<23.5<br>23.5-<25.0<br>25.0-<27.0<br>27.0-<30.0<br>≥30.0<br><18.5<br>18.5-<22.0<br>22.0-<23.5<br>23.5-<25.0<br>25.0-<27.0<br>27.0-<30.0<br>≥30.0                                                                     | 1.22 (0.76-1.97)<br>1.00<br>0.82 (0.60-1.13)<br>1.04 (0.77-1.40)<br>0.91 (0.64-1.30)<br>0.88 (0.59-1.32)<br>1.07 (0.61-1.88)<br>0.28 (0.07-1.10)<br>1.00<br>0.97 (0.77-1.23)<br>1.15 (0.90-1.45)<br>1.14 (0.89-1.46)<br>1.40 (1.07-1.82)<br>1.61 (1.08-2.41)                                                                                                 | Age                       |
| Reuser M et al, 2009, USA       | US Health and Retirement Survey and Asset and Health Dynamics Among the Oldest Old | 1992-1993 – 2002, 7.8 years follow-up | 16192 men and women, age 51-61 and ≥70 years: 2354 deaths | Self-reported | No                                                     | First 3 years of follow-up excluded in main analysis | BMI, men, age 55-80 years<br><br>BMI, men, age ≥80 years<br><br>BMI, women, age 55-80 years<br><br>BMI, women, age ≥80 years | 18.5-22.9<br>23.0-24.9<br>25.0-29.9<br>30.0-34.9<br>≥35.0<br>18.5-22.9<br>23.0-24.9<br>25.0-29.9<br>30.0-34.9<br>≥35.0<br>18.5-22.9<br>23.0-24.9<br>25.0-29.9<br>30.0-34.9<br>≥35.0<br>18.5-22.9<br>23.0-24.9<br>25.0-29.9<br>30.0-34.9<br>≥35.0 | 1.42 (1.11-1.81)<br>1.00<br>0.96 (0.79-1.18)<br>1.08 (0.83-1.39)<br>1.47 (1.02-2.12)<br>1.10 (0.87-1.39)<br>1.00<br>0.86 (0.70-1.06)<br>0.85 (0.60-1.21)<br>1.31 (0.67-2.58)<br>1.01 (0.77-1.34)<br>1.00<br>1.03 (0.79-1.34)<br>1.07 (0.77-1.49)<br>1.95 (1.36-2.79)<br>1.01 (0.84-1.34)<br>1.00<br>0.80 (0.66-0.98)<br>0.95 (0.72-1.26)<br>1.80 (1.23-2.64) | Smoking status, education |
| Ferrie JE et al, 2009, UK       | The General Post Office Study                                                      | 1966-1967 - 2007, 40 years follow-up  | 644 women and 1272 men, age 35-70 years: 348/871 deaths   | Measured      | No                                                     | No                                                   | BMI, women<br><br>BMI, men                                                                                                   | <18.5<br>18.5-24.9<br>25.0-29.9<br>≥30.0<br><18.5<br>18.5-24.9<br>25.0-29.9<br>≥30.0                                                                                                                                                             | 1.78 (0.91-3.49)<br>1.00<br>0.84 (0.66-1.06)<br>1.53 (1.11-2.12)<br>1.72 (0.99-2.99)<br>1.00<br>0.97 (0.84-1.11)<br>1.22 (0.92-1.61)                                                                                                                                                                                                                         | Age                       |



|                                        |                                                     |                                        |                                                         |          |                                                                                             |                                                                              |                             |                                                                                              |                                                                                                                                                  |                                                                                                                                                                                                                       |
|----------------------------------------|-----------------------------------------------------|----------------------------------------|---------------------------------------------------------|----------|---------------------------------------------------------------------------------------------|------------------------------------------------------------------------------|-----------------------------|----------------------------------------------------------------------------------------------|--------------------------------------------------------------------------------------------------------------------------------------------------|-----------------------------------------------------------------------------------------------------------------------------------------------------------------------------------------------------------------------|
| Guallar-Castillon P et al, 2009, Spain | Spanish Elderly                                     | 2000-2001 – 2007, 5.7 years follow-up  | 3536 men and women, age ≥60 years: 659 deaths           | Measured | No                                                                                          | No                                                                           | BMI                         | <25.6/<26.1<br><28.0/<29.0<br><30.7/<32.4<br>≥30.7/≥32.4                                     | 1.00<br>0.82 (0.64-1.04)<br>0.72 (0.58-0.90)<br>0.85 (0.66-1.08)                                                                                 | Age, sex, education, smoking status, alcohol, leisure-time physical activity, chronic obstructive lung disease, cancer, untreated cataracts, depression requiring treatment, dementia, SF-36 mental summary component |
|                                        |                                                     |                                        |                                                         |          |                                                                                             |                                                                              | BMI, no mobility limitation | <25.6/<26.1<br><28.0/<29.0<br><30.7/<32.4<br>≥30.7/≥32.4                                     | 1.00<br>1.04 (0.67-1.61)<br>1.03 (0.65-1.64)<br>0.92 (0.53-1.62)                                                                                 |                                                                                                                                                                                                                       |
|                                        |                                                     |                                        |                                                         |          |                                                                                             |                                                                              | BMI, mobility limitation    | <25.6/<26.1<br><28.0/<29.0<br><30.7/<32.4<br>≥30.7/≥32.4                                     | 1.00<br>0.65 (0.47-0.89)<br>0.47 (0.34-0.65)<br>0.52 (0.35-0.78)                                                                                 |                                                                                                                                                                                                                       |
| Walter S et al, 2009, Netherlands      | Rotterdam Study                                     | 1990-1993 – 2006, 15 years follow-up   | 5980 men and women, age : 2388 deaths                   | Measured | Excluded participant with unintentional weight loss of >3.5 kg in 18 months before baseline | No                                                                           | BMI, non-disabled           | 18.5-25<br>25-30<br>30-35<br>≥35                                                             | 1.00<br>0.96 (0.86-1.07)<br>1.06 (0.89-1.25)<br>1.31 (0.86-1.99)                                                                                 | Age, sex, smoking status, pack-years of cigarettes, alcohol consumption, alcohol in g/d, education, income, living situation                                                                                          |
|                                        |                                                     |                                        |                                                         |          |                                                                                             |                                                                              | BMI, disabled               | 18.5-25<br>25-30<br>30-35<br>≥35                                                             | 1.00<br>0.82 (0.70-0.96)<br>0.73 (0.60-0.90)<br>1.12 (0.80-1.57)                                                                                 |                                                                                                                                                                                                                       |
| Klenk J et al, 2009, Austria           | The Vorarlberg Health Monitoring & Promotom Program | 1985-2003 – 2006, 15.1 years follow-up | 184697 men and women, mean age 41.7 years: 15557 deaths | Measured | No                                                                                          | First 1-3 years follow-up excluded in sensitivity analyses, but not reported | BMI, men                    | <18.5<br>18.5-19.9<br>20.0-22.4<br>22.5-24.9<br>25.0-27.4<br>27.5-29.9<br>30.0-34.9<br>≥35.0 | 2.57 (2.17-3.05)<br>1.44 (1.25-1.65)<br>1.24 (1.15-1.34)<br>1.00<br>1.01 (0.95-1.08)<br>1.13 (1.05-1.21)<br>1.25 (1.15-1.35)<br>2.13 (1.82-2.48) | Age, smoking status                                                                                                                                                                                                   |
|                                        |                                                     |                                        |                                                         |          |                                                                                             |                                                                              | BMI, women                  | <18.5<br>18.5-19.9<br>20.0-22.4<br>22.5-24.9<br>25.0-27.4<br>27.5-29.9<br>30.0-34.9<br>≥35.0 | 1.40 (1.21-1.62)<br>1.11 (0.99-1.26)<br>1.06 (0.98-1.14)<br>1.00<br>1.05 (0.98-1.13)<br>1.10 (1.02-1.19)<br>1.29 (1.20-1.40)<br>1.60 (1.42-1.81) |                                                                                                                                                                                                                       |
| Wandell PE et al, 2009, Sweden         | Stockholm County Study                              | 1969-1996, 26 years follow-up          | 1020 men and women, age 18-64 years: 562 deaths         | Measured | No                                                                                          | No                                                                           | BMI, men                    | <20<br>20-<25<br>25-30<br>>30                                                                | 1.21 (0.49-3.00)<br>1.00<br>0.95 (0.64-1.39)<br>2.76 (1.43-5.33)                                                                                 | Age, need of care, heart rate, hypertension, low fasting blood glucose, diabetes, alcohol, smoking status                                                                                                             |
|                                        |                                                     |                                        |                                                         |          |                                                                                             |                                                                              | BMI, women                  | <20                                                                                          | 0.36 (0.15-0.91)                                                                                                                                 |                                                                                                                                                                                                                       |

|                                |                                      |                                                  |                                                          |          |    |                                                          |                                                                                                                                                                                                                                                                                    |                                                                                                                                                                                                                                  |                                                                                                                                                                                                                                                                                                                                                                                                                                                      |                                                                                                                                                                                               |
|--------------------------------|--------------------------------------|--------------------------------------------------|----------------------------------------------------------|----------|----|----------------------------------------------------------|------------------------------------------------------------------------------------------------------------------------------------------------------------------------------------------------------------------------------------------------------------------------------------|----------------------------------------------------------------------------------------------------------------------------------------------------------------------------------------------------------------------------------|------------------------------------------------------------------------------------------------------------------------------------------------------------------------------------------------------------------------------------------------------------------------------------------------------------------------------------------------------------------------------------------------------------------------------------------------------|-----------------------------------------------------------------------------------------------------------------------------------------------------------------------------------------------|
|                                |                                      |                                                  |                                                          |          |    |                                                          |                                                                                                                                                                                                                                                                                    | 20-<25<br>25-30<br>>30                                                                                                                                                                                                           | 1.00<br>0.88 (0.52-1.50)<br>1.59 (0.77-3.30)                                                                                                                                                                                                                                                                                                                                                                                                         |                                                                                                                                                                                               |
| Gulsvik AK et al, 2009, Norway | Bergen Clinical Blood Pressure Study | 1965-2007, 42 years follow-up                    | 5653 men and women, age 22-75 years: 4520 deaths         | Measured | No | No                                                       | BMI, age 20-44 years<br><br>BMI, age 45-64 years<br><br>BMI, ≥65 years                                                                                                                                                                                                             | <22<br>22-24.9<br>25.0-27.9<br>≥28.0<br><br><22<br>22-24.9<br>25.0-27.9<br>≥28.0<br><br><22<br>22-24.9<br>25.0-27.9<br>≥28.0                                                                                                     | 0.85 (0.65-1.12)<br>1.00<br>1.23 (0.91-1.66)<br>1.65 (1.09-2.50)<br>1.06 (0.87-1.29)<br>1.00<br>1.00 (0.84-1.19)<br>1.29 (1.07-1.56)<br>1.58 (1.11-2.25)<br>1.00<br>0.86 (0.64-1.16)<br>1.10 (0.83-1.46)                                                                                                                                                                                                                                             | Sex, hypertension, cholesterol, smoking status and cigarettes per day, SES, diabetes, cardiovascular disease, chronic obstructive pulmonary disease, physical inactivity, physical appearance |
| Stessman J et al, 2009, Israel | Jersusalem Longitudinal Study        | 1990, 1998, 2005 – 2008, 18/10/3 years follow-up | 447/870/1086 men and women, age 70, 78, and 85 years: NA | NA       | No | Yes, excluding the first 1, 3.5 and 6 years of follow-up | BMI, women, 1990-2008<br><br>BMI, women, 1996-2008<br><br>BMI, women, 1998-2008<br><br>BMI, women, 2001-2008<br><br>BMI, women, 2005-2008<br><br>BMI, women, 2006-2008<br><br>BMI, men, 1990-2008<br><br>BMI, men, 1996-2008<br><br>BMI, men, 1998-2008<br><br>BMI, men, 2001-2008 | <25<br>25-29.9<br>≥30<br><br><25<br>25-29.9<br>≥30<br><br><25<br>25-29.9<br>≥30<br><br><25<br>25-29.9<br>≥30<br><br><25<br>25-29.9<br>≥30<br><br><25<br>25-29.9<br>≥30<br><br><25<br>25-29.9<br>≥30<br><br><25<br>25-29.9<br>≥30 | 1.00<br>0.55 (0.33-0.92)<br>0.45 (0.25-0.83)<br>1.00<br>0.55 (0.31-0.97)<br>0.39 (0.20-0.79)<br>1.00<br>0.66 (0.41-1.05)<br>0.41 (0.25-0.68)<br>1.00<br>0.45 (0.26-0.76)<br>0.28 (0.16-0.49)<br>1.00<br>0.30 (0.15-0.62)<br>0.38 (0.19-0.78)<br>1.00<br>0.22 (0.09-0.51)<br>0.18 (0.07-0.47)<br>1.00<br>0.93 (0.63-1.70)<br>1.03 (0.59-1.79)<br>1.00<br>0.88 (0.55-1.40)<br>1.17 (0.61-2.26)<br>1.00<br>0.77 (0.54-1.09)<br>0.78 (0.48-1.28)<br>1.00 | Perceived economic hardship, self-rated health, physical activity, pack-years of smoking, activity of daily living dependency, hypertension, DM, IHD, cancer                                  |

|                               |                                   |                                       |                                                 |               |    |                                                              |                     |                                                          |                                                                                      |                                                                                                                                                                                                                                              |
|-------------------------------|-----------------------------------|---------------------------------------|-------------------------------------------------|---------------|----|--------------------------------------------------------------|---------------------|----------------------------------------------------------|--------------------------------------------------------------------------------------|----------------------------------------------------------------------------------------------------------------------------------------------------------------------------------------------------------------------------------------------|
|                               |                                   |                                       |                                                 |               |    |                                                              | BMI, men, 2005-2008 | 25-29.9<br>≥30                                           | 0.94 (0.61-1.46)<br>0.53 (0.27-1.07)                                                 |                                                                                                                                                                                                                                              |
|                               |                                   |                                       |                                                 |               |    |                                                              | BMI, men, 2006-2008 | <25<br>25-29.9<br>≥30                                    | 1.00<br>1.06 (0.52-2.10)<br>0.36 (0.10-1.30)                                         |                                                                                                                                                                                                                                              |
|                               |                                   |                                       |                                                 |               |    |                                                              |                     | 25-29.9<br>≥30                                           | 1.04 (0.47-2.30)<br>0.28 (0.06-1.33)                                                 |                                                                                                                                                                                                                                              |
| Cesari M et al, 2009, Italy   | The InCHIANTI Study               | 1998-2000 – 2006, 5.1 years follow-up | 934 men and women, age ≥65 years: 263 deaths    | NA            | No | No                                                           | BMI, no sarcopenia  | <25<br>25-29.9<br>≥30                                    | 1.00<br>1.17 (0.65-2.09)<br>0.99 (0.53-1.84)                                         | Age, sex, site, education, mini-mental state examination score, center for epidemiological studies depression scale score, physical activity, CHF, CAD, hypertension, PAD, respiratory disease, osteoarthritis, stroke, IL-6, CRP, TNF-alpha |
|                               |                                   |                                       |                                                 |               |    |                                                              | BMI, sarcopenia     | <25<br>25-29.9<br>≥30                                    | 1.25 (0.69-2.25)<br>1.24 (0.65-2.37)<br>1.18 (0.46-3.02)                             |                                                                                                                                                                                                                                              |
| Neovius M et al, 2009, Sweden | Swedish Military Conscripts       | 1969-1970 – 2007, 38 years follow-up  | 45920 men, mean age 18.7 years: 2878 deaths     | Measured      | No | No                                                           | BMI, all            | <18.5<br>18.5-24.9<br>25.0-29.9<br>≥30.0                 | 0.97 (0.86-1.08)<br>1.00<br>1.33 (1.15-1.53)<br>2.14 (1.61-2.85)                     | Age, muscular strength, SES, smoking status, cigarettes per day                                                                                                                                                                              |
|                               |                                   |                                       |                                                 |               |    |                                                              | BMI, non-smokers    | <18.5<br>18.5-24.9<br>25.0-29.9<br>≥30.0                 | 0.94 (0.75-1.18)<br>1.00<br>1.37 (1.05-1.79)<br>2.16 (1.24-3.76)                     |                                                                                                                                                                                                                                              |
|                               |                                   |                                       |                                                 |               |    |                                                              | BMI, smokers        | <18.5<br>18.5-24.9<br>25.0-29.9<br>≥30.0                 | 0.97 (0.85-1.11)<br>1.00<br>1.35 (1.14-1.60)<br>2.23 (1.60-3.12)                     |                                                                                                                                                                                                                                              |
|                               |                                   |                                       |                                                 |               |    |                                                              | BMI, 1-10 cig/d     | <18.5<br>18.5-24.9<br>25.0-29.9<br>≥30.0                 | 0.91 (0.75-1.10)<br>1.00<br>1.44 (1.11-1.86)<br>1.83 (0.98-3.42)                     |                                                                                                                                                                                                                                              |
|                               |                                   |                                       |                                                 |               |    |                                                              | BMI, >10 cig/d      | <18.5<br>18.5-24.9<br>25.0-29.9<br>≥30.0                 | 1.05 (0.88-1.25)<br>1.00<br>1.23 (0.98-1.54)<br>2.27 (1.53-3.38)                     |                                                                                                                                                                                                                                              |
| Orpana HM et al, 2010, Canada | National Population Health Survey | 1994-1995 - 2005, 12 years follow-up  | 11326 men and women, age ≥25 years: 1929 deaths | Self-reported | No | First 4 years excluded in sensitivity analyses (Results were | BMI, all            | <18.5<br>18.5-<25.0<br>25.0-<30.0<br>30.0-<35.0<br>≥35.0 | 1.73 (1.25-2.39)<br>1.00<br>0.83 (0.72-0.96)<br>0.95 (0.77-1.18)<br>1.36 (1.00-1.85) | Age, sex, smoking status, physical activity, alcohol                                                                                                                                                                                         |

|  |  |  |                               |  |  |                            |                      |                                                                                                         |                                                                                                                                                  |  |
|--|--|--|-------------------------------|--|--|----------------------------|----------------------|---------------------------------------------------------------------------------------------------------|--------------------------------------------------------------------------------------------------------------------------------------------------|--|
|  |  |  | 4213 never smokers: 37 deaths |  |  | similar, but not reported) | BMI, corrected       | <18.5<br>18.5-<25.0<br>25.0-<30.0<br>30.0-<35.0<br>≥35.0                                                | 1.51 (0.99-2.30)<br>1.00<br>0.75 (0.65-0.86)<br>0.84 (0.67-1.05)<br>1.09 (0.86-1.39)                                                             |  |
|  |  |  |                               |  |  |                            | BMI, age 25-59 years | <18.5<br>18.5-<25.0<br>25.0-<30.0<br>30.0-<35.0<br>≥35.0                                                | 0.87 (0.20-3.85)<br>1.00<br>0.91 (0.66-1.25)<br>0.89 (0.49-1.60)<br>1.53 (0.91-2.58)                                                             |  |
|  |  |  |                               |  |  |                            | BMI, age ≥60 years   | <18.5<br>18.5-<25.0<br>25.0-<30.0<br>30.0-<35.0<br>≥35.0                                                | 1.88 (1.32-2.68)<br>1.00<br>0.81 (0.68-0.97)<br>0.96 (0.76-1.21)<br>1.25 (0.83-1.90)                                                             |  |
|  |  |  |                               |  |  |                            | BMI, men             | <18.5<br>18.5-<25.0<br>25.0-<30.0<br>30.0-<35.0<br>≥35.0                                                | 2.54 (1.47-4.37)<br>1.00<br>0.86 (0.71-1.03)<br>1.10 (0.81-1.49)<br>1.72 (1.13-2.63)                                                             |  |
|  |  |  |                               |  |  |                            | BMI, women           | <18.5<br>18.5-<25.0<br>25.0-<30.0<br>30.0-<35.0<br>≥35.0                                                | 1.50 (1.01-2.22)<br>1.00<br>0.77 (0.63-0.95)<br>0.81 (0.62-1.08)<br>1.09 (0.69-1.74)                                                             |  |
|  |  |  |                               |  |  |                            | BMI, ever smokers    | <18.5<br>18.5-<25.0<br>25.0-<30.0<br>30.0-<35.0<br>≥35.0                                                | 1.69 (1.10-2.60)<br>1.00<br>0.82 (0.69-0.96)<br>0.94 (0.73-1.21)<br>1.21 (0.85-1.74)                                                             |  |
|  |  |  |                               |  |  |                            | BMI, never smokers   | <18.5<br>18.5-<25.0<br>25.0-<30.0<br>30.0-<35.0<br>≥35.0                                                | 2.05 (1.32-3.18)<br>1.00<br>0.76 (0.58-0.99)<br>0.83 (0.55-1.26)<br>1.68 (0.93-3.05)                                                             |  |
|  |  |  |                               |  |  |                            | BMI                  | <18.5<br>18.5-<20.0<br>20.0-<22.5<br>22.5-<25.0<br>25.0-<27.5<br>27.5-<30.0<br>30.0-<32.5<br>32.5-<35.0 | 1.89 (1.36-2.64)<br>1.23 (0.86-1.76)<br>1.18 (0.98-1.44)<br>1.00<br>0.93 (0.77-1.12)<br>0.87 (0.69-1.10)<br>1.08 (0.80-1.45)<br>0.92 (0.67-1.26) |  |

|                                       |                                                                  |                                        |                                                                                                                                                                            |               |                                                                                                  |                                                                                                    |                                                                                                                                                                |                                                                                                                                                                                                                            |                                                                                                                                                                                                                                                                                                                                  |                                                                                                                                                                                             |
|---------------------------------------|------------------------------------------------------------------|----------------------------------------|----------------------------------------------------------------------------------------------------------------------------------------------------------------------------|---------------|--------------------------------------------------------------------------------------------------|----------------------------------------------------------------------------------------------------|----------------------------------------------------------------------------------------------------------------------------------------------------------------|----------------------------------------------------------------------------------------------------------------------------------------------------------------------------------------------------------------------------|----------------------------------------------------------------------------------------------------------------------------------------------------------------------------------------------------------------------------------------------------------------------------------------------------------------------------------|---------------------------------------------------------------------------------------------------------------------------------------------------------------------------------------------|
|                                       |                                                                  |                                        |                                                                                                                                                                            |               |                                                                                                  |                                                                                                    |                                                                                                                                                                | ≥35.0                                                                                                                                                                                                                      | 1.48 (1.06-2.06)                                                                                                                                                                                                                                                                                                                 |                                                                                                                                                                                             |
| Iversen L et al, 2010, United Kingdom | Royal College of General Practitioners' Oral Contraceptive Study | 1994-1995 – 2006, 11.8 years follow-up | 10073 women, mean age 56.1 years: 896 deaths                                                                                                                               | Self-reported | No                                                                                               | No                                                                                                 | BMI                                                                                                                                                            | <18.50<br>18.50-24.99<br>25.00-29.99<br>≥30.00                                                                                                                                                                             | 1.66 (1.03-2.68)<br>1.00<br>0.98 (0.84-1.14)<br>1.03 (0.85-1.24)                                                                                                                                                                                                                                                                 | Age, social class, parity, history of serious illness (IHD, hypertension, stroke, venous thromboembolism, malignancy, diabetes, asthma, bronchitis), pack-years, alcohol, physical activity |
| Pierce BL et al, 2010, Bangladesh     | Health Effects of Arsenic Longitudinal Study (HEALS)             | 2000-2002 – 2009, 6.4 years follow-up  | 11445 men and women, age 18-75 years: 393 deaths                                                                                                                           | Measured      | No                                                                                               | First 2 years excluded in sensitivity analysis (risk estimates not reported, only shown in figure) | BMI, men<br><br>BMI, women                                                                                                                                     | <16.0<br>16.0-16.9<br>17.0-18.4<br>18.5-22.9<br>≥23.0<br><br><16.0<br>16.0-16.9<br>17.0-18.4<br>18.5-22.9<br>≥23.0                                                                                                         | 2.31 (1.34-3.25)<br>1.62 (1.13-2.33)<br>1.14 (0.82-1.57)<br>1.00<br>1.49 (1.00-2.23)<br>1.58 (0.92-2.69)<br>0.89 (0.45-1.77)<br>0.84 (0.49-1.40)<br>1.00<br>0.54 (0.27-1.12)                                                                                                                                                     | Age, sex, smoking status, education, BMI-related symptoms experienced in the 6 months prior to baseline (weight loss and weakness)                                                          |
| Arnlov J et al, 2010, Sweden          | Uppsala Longitudinal Study of Adult Men (ULSAM)                  | 1970-1973 –NA, 30 years follow-up      | 1758 men, age ≥50 years: 788 deaths                                                                                                                                        | NA            | CVD hospitalization, diabetes                                                                    | No                                                                                                 | BMI                                                                                                                                                            | <25, no metsyn<br><25, metsyn<br>25-29.9, no metsyn<br>25-29.9, metsyn<br>≥30, no metsyn<br>≥30, metsyn                                                                                                                    | 1.00<br>1.28 (0.90-1.82)<br>1.21 (1.03-1.40)<br><br>1.53 (1.19-1.96)<br>1.65 (1.03-2.66)<br>2.43 (1.81-3.27)                                                                                                                                                                                                                     | Age, smoking status, LDL cholesterol                                                                                                                                                        |
| Odegaard AO et al, 2010, Singapore    | Singapore Chinese Health Study                                   | 1993-1998 – 2008, 12.4 years follow-up | 51251 men and women, age 45-74 years: 8356 deaths<br><br>9777 current smokers: 2762 deaths<br><br>5708 former smokers: 1423 deaths<br><br>35766 never smokers: 4171 deaths | Self-reported | Prevalent cardiovascular disease, diabetes, respiratory disease excluded in sensitivity analyses | First 5 years of follow-up excluded in sensitivity analyses                                        | BMI, current smokers including prevalent disease<br><br>BMI, former smokers including prevalent disease<br><br>BMI, never smokers, including prevalent disease | <18.5<br>18.5-19.9<br>20.0-21.4<br>21.5-22.9<br>23.0-24.4<br>24.5-25.9<br>26.0-27.4<br>≥27.5<br><br><18.5<br>18.5-19.9<br>20.0-21.4<br>21.5-22.9<br>23.0-24.4<br>24.5-25.9<br>26.0-27.4<br>≥27.5<br><br><18.5<br>18.5-19.9 | 1.18 (0.97-1.43)<br>1.14 (0.94-1.38)<br>1.03 (0.86-1.25)<br>0.99 (0.82-1.20)<br>1.00 (0.83-1.21)<br>1.09 (0.89-1.33)<br>1.00<br>1.25 (1.01-1.55)<br>1.48 (1.20-1.82)<br>1.25 (1.02-1.55)<br>1.12 (0.93-1.36)<br>1.04 (0.86-1.26)<br>1.00<br>1.17 (0.96-1.43)<br>1.27 (1.02-1.59)<br>1.36 (1.11-1.68)<br>1.19 (1.03-1.39)<br>1.00 | Age, sex, year of enrollment, dialect, education, dietary pattern score, physical activity, intensity and duration of smoking among smokers, and durations since quit in former smokers     |

|  |  |  |  |  |  |                                                                                                 |           |                  |  |
|--|--|--|--|--|--|-------------------------------------------------------------------------------------------------|-----------|------------------|--|
|  |  |  |  |  |  |                                                                                                 | 20.0-21.4 | 0.93 (0.82-1.06) |  |
|  |  |  |  |  |  |                                                                                                 | 21.5-22.9 | 1.02 (0.90-1.15) |  |
|  |  |  |  |  |  |                                                                                                 | 23.0-24.4 | 1.00 (0.88-1.13) |  |
|  |  |  |  |  |  |                                                                                                 | 24.5-25.9 | 1.02(0.89-1.16)  |  |
|  |  |  |  |  |  |                                                                                                 | 26.0-27.4 | 1.16 (1.00-1.34) |  |
|  |  |  |  |  |  |                                                                                                 | ≥27.5     | 1.27 (1.12-1.45) |  |
|  |  |  |  |  |  | BMI, current smokers<br>excluding prevalent disease                                             | <18.5     | 1.40 (1.11-1.77) |  |
|  |  |  |  |  |  |                                                                                                 | 18.5-19.9 | 1.32 (1.05-1.67) |  |
|  |  |  |  |  |  |                                                                                                 | 20.0-21.4 | 1.17 (0.93-1.47) |  |
|  |  |  |  |  |  |                                                                                                 | 21.5-22.9 | 1.19 (0.94-1.51) |  |
|  |  |  |  |  |  |                                                                                                 | 23.0-24.4 | 1.13 (0.89-1.43) |  |
|  |  |  |  |  |  |                                                                                                 | 24.5-25.9 | 1.23 (0.96-1.58) |  |
|  |  |  |  |  |  |                                                                                                 | 26.0-27.4 | 1.00             |  |
|  |  |  |  |  |  |                                                                                                 | ≥27.5     | 1.44 (1.10-1.87) |  |
|  |  |  |  |  |  | BMI, former smokers<br>excluding prevalent disease                                              | <18.5     | 1.69 (1.29-2.21) |  |
|  |  |  |  |  |  |                                                                                                 | 18.5-19.9 | 1.26 (0.96-1.67) |  |
|  |  |  |  |  |  |                                                                                                 | 20.0-21.4 | 1.23 (0.95-1.58) |  |
|  |  |  |  |  |  |                                                                                                 | 21.5-22.9 | 1.10 (0.85-1.42) |  |
|  |  |  |  |  |  |                                                                                                 | 23.0-24.4 | 1.00             |  |
|  |  |  |  |  |  |                                                                                                 | 24.5-25.9 | 1.16 (0.89-1.52) |  |
|  |  |  |  |  |  |                                                                                                 | 26.0-27.4 | 1.48 (1.10-1.98) |  |
|  |  |  |  |  |  |                                                                                                 | ≥27.5     | 1.51 (1.15-1.98) |  |
|  |  |  |  |  |  | BMI, never smokers,<br>excluding prevalent disease                                              | <18.5     | 1.27 (1.06-1.52) |  |
|  |  |  |  |  |  |                                                                                                 | 18.5-19.9 | 1.00             |  |
|  |  |  |  |  |  |                                                                                                 | 20.0-21.4 | 0.99 (0.85-1.15) |  |
|  |  |  |  |  |  |                                                                                                 | 21.5-22.9 | 1.06 (0.91-1.23) |  |
|  |  |  |  |  |  |                                                                                                 | 23.0-24.4 | 1.01 (0.87-1.18) |  |
|  |  |  |  |  |  |                                                                                                 | 24.5-25.9 | 1.04 (0.89-1.22) |  |
|  |  |  |  |  |  |                                                                                                 | 26.0-27.4 | 1.19 (1.01-1.42) |  |
|  |  |  |  |  |  |                                                                                                 | ≥27.5     | 1.25 (1.07-1.47) |  |
|  |  |  |  |  |  | BMI, current smokers<br>excluding prevalent disease,<br>excluding first 5 years of<br>follow-up | <18.5     | 1.52 (1.14-2.02) |  |
|  |  |  |  |  |  |                                                                                                 | 18.5-19.9 | 1.50 (1.13-1.99) |  |
|  |  |  |  |  |  |                                                                                                 | 20.0-21.4 | 1.34 (1.01-1.77) |  |
|  |  |  |  |  |  |                                                                                                 | 21.5-22.9 | 1.38 (1.04-1.83) |  |
|  |  |  |  |  |  |                                                                                                 | 23.0-24.4 | 1.27 (0.95-1.69) |  |
|  |  |  |  |  |  |                                                                                                 | 24.5-25.9 | 1.35 (1.00-1.83) |  |
|  |  |  |  |  |  |                                                                                                 | 26.0-27.4 | 1.00             |  |
|  |  |  |  |  |  |                                                                                                 | ≥27.5     | 1.65 (1.20-2.26) |  |
|  |  |  |  |  |  | BMI, former smokers<br>excluding prevalent disease,<br>excluding first 5 years of<br>follow-up  | <18.5     | 1.66 (1.20-2.28) |  |
|  |  |  |  |  |  |                                                                                                 | 18.5-19.9 | 1.21 (0.87-1.68) |  |
|  |  |  |  |  |  |                                                                                                 | 20.0-21.4 | 1.13 (0.84-1.52) |  |
|  |  |  |  |  |  |                                                                                                 | 21.5-22.9 | 1.15 (0.86-1.54) |  |
|  |  |  |  |  |  |                                                                                                 | 23.0-24.4 | 1.00             |  |



|                                   |                                                              |                                          |                                                   |               |                                                          |                                                             |                                                               |                                                                                                                                                                                                       |                                                                                                                                                                                                                                                                                                                          |                                                                                                                                                                                                                                                                                                                                 |
|-----------------------------------|--------------------------------------------------------------|------------------------------------------|---------------------------------------------------|---------------|----------------------------------------------------------|-------------------------------------------------------------|---------------------------------------------------------------|-------------------------------------------------------------------------------------------------------------------------------------------------------------------------------------------------------|--------------------------------------------------------------------------------------------------------------------------------------------------------------------------------------------------------------------------------------------------------------------------------------------------------------------------|---------------------------------------------------------------------------------------------------------------------------------------------------------------------------------------------------------------------------------------------------------------------------------------------------------------------------------|
| Vessey M et al, 2010, UK          | The Oxford-Family Planning Association Contraceptive Study   | 1968-1974 – 2009, ~ 35.4 years follow-up | 17032 women, age 25-39 years: 1715 deaths         | Self-reported | No exclusions reported                                   | No exclusions reported                                      | BMI                                                           | <20<br>20-21<br>22-23<br>24-25<br>26-27<br>≥28                                                                                                                                                        | 1.00<br>0.86 (0.74-1.01)<br>0.96 (0.83-1.13)<br>1.00 (0.84-1.20)<br>1.18 (0.95-1.46)<br>1.33 (1.07-1.64)                                                                                                                                                                                                                 | Age, parity, social class, smoking status and cigarettes per day, OC use, total OC use months, interval since last OC use                                                                                                                                                                                                       |
| Berraho M et al, 2010, France     | PAQUID Cohort Study                                          | NA-NA, 13 years follow-up                | 3646 men and women, age ≥65 years: 1973 deaths    | Self-reported | No                                                       | No                                                          | BMI<br><br>BMI, disabled<br><br>BMI, nondisabled              | <18.5<br>18.5-21.9<br>22.0-24.9<br>25.0-29.9<br>≥30.0<br><18.5<br>18.5-21.9<br>22.0-24.9<br>25.0-29.9<br>≥30.0<br><18.5<br>18.5-21.9<br>22.0-24.9<br>25.0-29.9<br>≥30.0                               | 1.45 (1.17-1.78)<br>1.27 (1.12-1.43)<br>1.00<br>0.98 (0.88-1.10)<br>1.06 (0.89-1.27)<br>1.43 (1.15-1.77)<br>1.30 (1.14-1.49)<br>1.00<br>0.95 (0.84-1.08)<br>1.06 (0.87-1.28)<br>0.88 (0.32-2.42)<br>0.95 (0.67-1.35)<br>1.00<br>1.12 (0.86-1.46)<br>0.87 (0.51-1.48)                                                     | Age, physical activity, smoking status, comorbidity (diabetes, dyspnea, hypertension, ischemic heart disease antecedent, stroke antecedent, number of medications used)                                                                                                                                                         |
| Atlantis E et al, 2010, Australia | The Melbourne Longitudinal Studies on Healthy Aging (MELSHA) | 1994-2006, 12 years follow-up            | 1000 men and women, age ≥65 years: 509 deaths     | Measured      | No exclusions                                            | No exclusions                                               | BMI                                                           | <18.5<br>18.5-24.9<br>25.0-29.9<br>≥30.0                                                                                                                                                              | 2.15 (1.15-4.02)<br>1.00<br>0.96 (0.77-1.20)<br>1.04 (0.76-1.42)                                                                                                                                                                                                                                                         | Age, sex, smoking status, activities of daily living, timed get up and go, social activity, cognitive impairment, CVD                                                                                                                                                                                                           |
| Nagai M et al, 2010, Japan        | The Ohsaki Cohort Study                                      | 1994-2006, 12 years follow-up            | 43972 men and women, age 40-79 years: 5707 deaths | Self-reported | Prevalent cancer, myocardial infarction, stroke excluded | First 2 years of follow-up excluded in sensitivity analyses | BMI, men<br><br>BMI, excluded first 2 years<br><br>BMI, women | <18.5<br>18.5-20.9<br>21.0-22.9<br>23.0-24.9<br>25.0-27.4<br>27.5-29.9<br>≥30.0<br><18.5<br>18.5-20.9<br>21.0-22.9<br>23.0-24.9<br>25.0-27.4<br>27.5-29.9<br>≥30.0<br><18.5<br>18.5-20.9<br>21.0-22.9 | 1.42 (1.23-1.65)<br>1.10 (0.99-1.22)<br>1.04 (0.95-1.14)<br>1.00<br>1.01 (0.90-1.13)<br>1.10 (0.92-1.31)<br>1.44 (1.11-1.87)<br>1.35 (1.15-1.59)<br>1.06 (0.95-1.19)<br>1.01 (0.92-1.12)<br>1.00<br>0.99 (0.88-1.12)<br>1.05 (0.87-1.26)<br>1.42 (1.07-1.88)<br>1.49 (1.24-1.80)<br>1.15 (0.99-1.33)<br>0.99 (0.87-1.14) | Age, weight change since age 20 years, education, marital status, cigarette smoking status and cigarettes per day, alcohol, time spent walking, sports and physical exercise, history of kidney disease, history of liver disease<br><br>Models with exclusion of first 2 year were also adjusted for hypertension and diabetes |



|                                     |                                                       |                                              |                                                        |               |                                                     |                                     |                            |                                                                                                                                 |                                                                                                                                                                                                  |                                                                                                                                            |
|-------------------------------------|-------------------------------------------------------|----------------------------------------------|--------------------------------------------------------|---------------|-----------------------------------------------------|-------------------------------------|----------------------------|---------------------------------------------------------------------------------------------------------------------------------|--------------------------------------------------------------------------------------------------------------------------------------------------------------------------------------------------|--------------------------------------------------------------------------------------------------------------------------------------------|
|                                     |                                                       |                                              |                                                        |               |                                                     |                                     |                            | 23.0-24.9<br>25.0-27.4<br>27.5-29.9<br>≥30.0<br><18.5<br>18.5-20.9<br>21.0-22.9<br>23.0-24.9<br>25.0-27.4<br>27.5-29.9<br>≥30.0 | 1.00<br>1.03 (0.89-1.19)<br>1.07 (0.89-1.30)<br>1.33 (1.05-1.69)<br>1.78 (1.13-2.81)<br>1.36 (1.00-1.86)<br>1.21 (0.92-1.59)<br>1.00<br>1.02 (0.76-1.36)<br>0.99 (0.68-1.45)<br>1.32 (0.82-2.15) |                                                                                                                                            |
| Byun W et al, 2010, USA             | Aerobics Center Longitudinal Study                    | 1974-2002 – 2003, 16.1 years follow-up       | 38110 men, age 20-84 years: 2642 deaths                | Measured      | Prevalent cardiovascular disease or cancer excluded | No                                  | BMI                        | 18.5-24.9<br>25.0-29.9<br>≥30.0                                                                                                 | 1.00<br>0.97 (0.89-1.05)<br>1.31 (1.16-1.48)                                                                                                                                                     | Age, examination year, hypertension, diabetes, hypercholesterolemia, smoking status, alcohol, physical activity, cardiorespiratory fitness |
| Hart CL et al, 2011, United Kingdom | Renfrew and Paisley Study                             | 1972-1976 - NA, 22.7 years follow-up         | 3613 never smoking women, age 45-64 years: 1796 deaths | Measured      | No                                                  | No                                  | BMI                        | 18.5-24.9<br>25.0-29.9<br>30.0-34.9<br>≥35.0                                                                                    | 1.00<br>1.10 (0.99-1.23)<br>1.35 (1.17-1.56)<br>2.01 (1.67-2.42)                                                                                                                                 | Age, occupational class                                                                                                                    |
| Carlsson S et al, 2011, Sweden      | Swedish Twin Registry                                 | 1969-1970, 1972 – 2004, 25.7 years follow-up | 44258 men and women, age 16-86 years: 14217 deaths     | Self-reported | No                                                  | First 2 years of follow-up excluded | BMI, men<br><br>BMI, women | <18.5<br>18.5-<25<br>25-<29.9<br>≥30<br><18.5<br>18.5-<25<br>25-<29.9<br>≥30                                                    | 1.18 (0.93-1.50)<br>1.00<br>1.22 (1.15-1.30)<br>1.64 (1.42-1.88)<br>1.24 (1.07-1.43)<br>1.00<br>1.30 (1.23-1.38)<br>1.66 (1.49-1.84)                                                             | Age, smoking status                                                                                                                        |
| Klijs B et al, 2011, Netherlands    | Dutch Permanent Survey of the Living Situation (POLS) | 1997-1999 – 2006, ~8 years follow-up         | 6217 men and women, age ≥55 years: 1614 deaths         | Self-reported | No                                                  | No                                  | BMI                        | 18.5-24.9<br>25.0-29.9<br>≥30.0                                                                                                 | 1.00<br>0.97 (0.87-1.07)<br>1.15 (0.98-1.36)                                                                                                                                                     | Age, sex, marital status                                                                                                                   |
| Hwang LC et al, 2011, Taiwan        | Six-Community Hypertension Intervention Project       | 1982-1983 – 2006, 24 years follow-up         | 6603 men and women, age 20-65 years: 1896 deaths       | Measured      | No                                                  | No                                  | BMI<br><br>BMI, men        | <23<br>23-24.9<br>25-26.9<br>≥27<br><23<br>23-24.9<br>25-26.9<br>≥27                                                            | 1.00<br>1.06 (0.94-1.19)<br>1.28 (1.12-1.47)<br>1.46 (1.27-1.68)<br>1.00<br>1.05 (0.90-1.23)<br>1.20 (1.09-1.32)<br>1.49 (1.20-1.85)                                                             | Age, sex, alcohol, smoking status, education, exercise                                                                                     |



|                              |                                      |                                      |                                                                                                                                                             |               |        |                                                             |                            |                                                                                                                                                                                                                                                                                                                      |                                                                                                                                                                                                                                                                                                                                                                                                                                                          |                                                                                                                                                                                |
|------------------------------|--------------------------------------|--------------------------------------|-------------------------------------------------------------------------------------------------------------------------------------------------------------|---------------|--------|-------------------------------------------------------------|----------------------------|----------------------------------------------------------------------------------------------------------------------------------------------------------------------------------------------------------------------------------------------------------------------------------------------------------------------|----------------------------------------------------------------------------------------------------------------------------------------------------------------------------------------------------------------------------------------------------------------------------------------------------------------------------------------------------------------------------------------------------------------------------------------------------------|--------------------------------------------------------------------------------------------------------------------------------------------------------------------------------|
|                              |                                      | follow-up                            | 1773 deaths<br><br>33916 healthy (no CVD/cancer) never smoking women: 770 deaths<br><br>NA current smokers: 547 deaths<br><br>NA former smokers: 456 deaths |               | cancer | analyses, partly reported                                   |                            | 22.5-24.9<br>25.0-27.4<br>27.5-29.9<br>30.0-34.9<br>35.0-39.9<br>40.0-49.9<br>15.0-18.4<br>18.5-19.9<br>20.0-22.4<br>22.5-24.9<br>25.0-27.4<br>27.5-29.9<br>30.0-34.9<br>35.0-39.9<br>40.0-49.9<br>15.0-18.4<br>18.5-19.9<br>20.0-22.4<br>22.5-24.9<br>25.0-27.4<br>27.5-29.9<br>30.0-34.9<br>35.0-39.9<br>40.0-49.9 | 1.00<br>1.12 (0.87-1.44)<br>1.31 (1.01-1.72)<br>1.27 (0.99-1.64)<br>1.51 (1.13-2.02)<br>2.19 (1.62-2.95)<br>1.86 (0.67-5.21)<br>2.29 (1.22-4.31)<br>1.41 (0.94-2.12)<br>1.00<br>1.06 (0.76-1.48)<br>1.15 (0.81-1.63)<br>1.04 (0.75-1.45)<br>1.43 (0.98-2.09)<br>2.04 (1.37-3.04)<br>1.51 (0.85-2.71)<br>1.06 (0.68-1.65)<br>0.90 (0.66-1.23)<br>1.00<br>0.68 (0.52-0.89)<br>0.67 (0.49-0.91)<br>0.85 (0.65-1.12)<br>0.73 (0.49-1.08)<br>1.48 (1.01-2.15) | activity, alcohol                                                                                                                                                              |
| Lisko I et al, 2011, Finland | Vitality 90+ Study                   | 2000-2004, 4 years follow-up         | 192 women and 65 men, age ≥90 years: 89/44 deaths                                                                                                           | Measured      | No     | First 2 years of follow-up excluded in sensitivity analyses | BMI, women<br><br>BMI, men | <18.5<br>18.5-24.9<br>25.0-29.9<br>≥30.0<br>18.5-24.9<br>25.0-29.9<br>≥30.0                                                                                                                                                                                                                                          | 1.09 (0.14-8.79)<br>1.29 (0.79-2.08)<br>1.00<br>1.07 (0.45-2.52)<br>3.09 (1.35-7.06)<br>1.00<br>1.63 (0.31-8.62)                                                                                                                                                                                                                                                                                                                                         | Chronic conditions (cardiovascular disease, cancer, diabetes, respiratory disease, infectious disease), MMSE score, functional status, smoking status, alcohol                 |
| Wee CC et al, 2011, USA      | Medicare Current Beneficiary Surveys | 1994-2000 – 2008, 14 years follow-up | 20975 men and women, age ≥65 years: 11093 deaths                                                                                                            | Self-reported | No     | First 1 year of follow-up excluded                          | BMI, men<br><br>BMI, women | <18.5<br>18.5-21.9<br>22.0-24.9<br>25.0-27.4<br>27.5-29.9<br>30.0-34.9<br>≥35.0<br><18.5<br>18.5-21.9<br>22.0-24.9<br>25.0-27.4<br>27.5-29.9                                                                                                                                                                         | 2.17 (1.74-2.71)<br>1.21 (1.09-1.33)<br>1.00<br>0.84 (0.78-0.92)<br>0.81 (0.73-0.90)<br>0.89 (0.81-0.99)<br>1.49 (1.20-1.85)<br>1.67 (1.45-1.92)<br>1.14 (1.04-1.25)<br>1.00<br>0.90 (0.81-0.99)<br>0.82 (0.74-0.92)                                                                                                                                                                                                                                     | Age, smoking status, education, proxy response, chronic health conditions (COPD, rheumatoid arthritis, dementia, mental retardation, Alzheimer, Parkinson disease), and cancer |

|                                       |                                                      |                                               |                                                                                                                                                              |          |                                                            |                                                |                                                                                                                                                                                                                     |                                                                                                                                                                                  |                                                                                                                                                                                                                                                                                           |                                                                                                                                                                                         |
|---------------------------------------|------------------------------------------------------|-----------------------------------------------|--------------------------------------------------------------------------------------------------------------------------------------------------------------|----------|------------------------------------------------------------|------------------------------------------------|---------------------------------------------------------------------------------------------------------------------------------------------------------------------------------------------------------------------|----------------------------------------------------------------------------------------------------------------------------------------------------------------------------------|-------------------------------------------------------------------------------------------------------------------------------------------------------------------------------------------------------------------------------------------------------------------------------------------|-----------------------------------------------------------------------------------------------------------------------------------------------------------------------------------------|
|                                       |                                                      |                                               |                                                                                                                                                              |          |                                                            |                                                |                                                                                                                                                                                                                     | 30.0-34.9<br>≥35.0                                                                                                                                                               | 0.98 (0.88-1.08)<br>1.21 (1.06-1.39)                                                                                                                                                                                                                                                      |                                                                                                                                                                                         |
| Puddu PE et al, 2011, Europe          | Seven Countries Study                                | 1960-2000, 25-40 years follow-up              | 6554 men, age 40-59 years: 5590 deaths                                                                                                                       | Measured | No                                                         | No                                             | BMI                                                                                                                                                                                                                 | <18.5<br>18.5-24.9<br>25.0-29.9<br>≥30.0                                                                                                                                         | 1.00<br>0.88 (0.73-1.08)<br>1.02 (0.83-1.26)<br>1.16 (0.92-1.48)                                                                                                                                                                                                                          | Age, location, father status, mother status, SES, physical activity, cigarettes per day, arm circumference, mean blood pressure, heart rate, serum cholesterol, FEV1, ECG abnormalities |
| Cohen-Mansfield J et al, 2011, Israel | Cross-Sectional and Longitudinal Aging Study (CALAS) | 1989-1992 - NA, 20 years follow-up            | 1369 men and women, age 75-94 years: 1310 deaths                                                                                                             | Measured | No                                                         | No                                             | BMI                                                                                                                                                                                                                 | <22<br>22-30<br>>30                                                                                                                                                              | 1.41 (1.20-1.67)<br>1.00<br>1.12 (0.93-1.34)                                                                                                                                                                                                                                              | Age, sex, origin, education, additional income, had children                                                                                                                            |
| Niedhammer I et al, 2011, France      | Lorhandicap Study                                    | 1996-2008, 12.5 years follow-up               | 4118 men and women, age 15-<70 years: 165 deaths                                                                                                             | NA       | No                                                         | No                                             | BMI, all<br><br>BMI, men<br><br>BMI, women                                                                                                                                                                          | <25<br>25-30<br>≥30<br><br><25<br>25-30<br>≥30<br><br><25<br>25-30<br>≥30                                                                                                        | 1.00<br>0.91 (0.63-1.31)<br>0.91 (0.60-1.40)<br><br>1.00<br>0.92 (0.60-1.40)<br>0.86 (0.50-1.47)<br><br>1.00<br>0.86 (0.41-1.80)<br>0.99 (0.49-2.02)                                                                                                                                      | Age, sex, SES, smoking status, alcohol, biomechanical exposure, physical exposure, temporary contract, social support                                                                   |
| Hotchkiss JW et al, 2011, Scotland    | Scottish Health Surveys                              | 1995, 1998, 2003 - 2007, ~9.2 years follow-up | 20117 (BMI) men and women, age 18-86 years: 1280 deaths<br><br>8204 never smokers: 214 deaths<br><br>7995 never smokers, excluding first 2 years: 185 deaths | Measured | Prevalent cancers and CVD excluded in sensitivity analyses | First 2 years excluded in sensitivity analyses | BMI, all<br><br>BMI, excluding prevalent cancer and CVD<br><br>BMI, excluding prevalent cancer and CVD and ever smokers<br><br>BMI, excluding prevalent cancer and CVD, ever smokers and first 2 years of follow-up | <18.5<br>18.5-<25<br>25.0-<30<br>≥30.0<br><br><18.5<br>18.5-<25<br>25.0-<30<br>≥30.0<br><br><18.5<br>18.5-<25<br>25.0-<30<br>≥30.0<br><br><18.5<br>18.5-<25<br>25.0-<30<br>≥30.0 | 1.63 (1.95-3.55)<br>1.00<br>0.80 (0.70-0.91)<br>0.93 (0.80-1.07)<br><br>2.54 (1.82-3.55)<br>1.00<br>0.75 (0.65-0.87)<br>0.87 (0.74-1.03)<br><br>2.71 (0.84-8.70)<br>1.00<br>0.68 (0.49-0.95)<br>0.94 (0.67-1.32)<br><br>4.52 (1.06-19.18)<br>1.00<br>1.02 (0.66-1.59)<br>1.09 (0.67-1.78) | Age, sex, smoking status, alcohol, survey year                                                                                                                                          |
| Mehta NK et al, 2011, USA             | Framingham Heart Study Offspring Cohort              | 1985-1992 - 2003, 14.8 years follow-up        | 2744 men and women, mean age 55.4 years: 470                                                                                                                 | Measured | No                                                         | No                                             | BMI                                                                                                                                                                                                                 | <18.5<br>18.5-24.9<br>25.0-29.9<br>30.0-34.9                                                                                                                                     | 2.77 (1.28-6.00)<br>1.00<br>0.87 (0.70-1.09)<br>0.98 (0.74-1.29)                                                                                                                                                                                                                          | Sex, cigarette smoking status and packs per day, education                                                                                                                              |

|                              |                                                             |                                         |                                               |               |                                                                                                                                                                                                                                                      |                                                                                        |                                                                                                                                                                             |                                                                                 |                                                                                                                                                                                              |                                                                                                     |
|------------------------------|-------------------------------------------------------------|-----------------------------------------|-----------------------------------------------|---------------|------------------------------------------------------------------------------------------------------------------------------------------------------------------------------------------------------------------------------------------------------|----------------------------------------------------------------------------------------|-----------------------------------------------------------------------------------------------------------------------------------------------------------------------------|---------------------------------------------------------------------------------|----------------------------------------------------------------------------------------------------------------------------------------------------------------------------------------------|-----------------------------------------------------------------------------------------------------|
|                              |                                                             |                                         | deaths                                        |               |                                                                                                                                                                                                                                                      |                                                                                        |                                                                                                                                                                             | ≥35.0                                                                           | 1.85 (1.27-2.69)                                                                                                                                                                             |                                                                                                     |
| Heir T et al, 2011, Norway   | Norwegian White and Blue collar workers                     | 1972-1975 - 1999, 25-27 years follow-up | 2014 healthy men, age 40-59 years: 746 deaths | NA            | Coronary or other heart diseases, advanced pulmonary diseases, diabetes mellitus, hypertension treated with drugs, advanced renal disease, liver disease, cancer and miscellaneous other diseases including neurological, muscular or joint diseases | First 5 years excluded in sensitivity analyses (results not altered, but not reported) | BMI, non-smokers (former and never), CVD mortality<br><br>BMI, non-smokers, non-CVD mortality<br><br>BMI, smokers, CVD mortality<br><br>BMI, non-smokers, non-CVD mortality | <25<br>25-29.9<br>≥30<br><br><25<br>25-29.9<br>≥30<br><br><25<br>25-29.9<br>≥30 | 1.00<br>1.63 (1.19-2.23)<br>3.67 (2.02-6.64)<br>1.00<br>0.89 (0.64-1.24)<br>2.28 (1.18-4.39)<br>1.00<br>1.10 (0.82-1.48)<br>2.06 (1.14-3.73)<br>1.00<br>0.85 (0.63-1.16)<br>0.94 (0.42-2.16) | Age                                                                                                 |
| Tsai AC et al, 2011, Taiwan  | Survey of Health and Living Status of the Elderly in Taiwan | 1999-2003, 4 years follow-up            | 4191 men and women, age ≥53 years: 566 deaths | Self-reported | No                                                                                                                                                                                                                                                   | No                                                                                     | BMI, age 53-64 years<br><br>BMI, age 65-74 years<br><br>BMI, age ≥75 years                                                                                                  | <21<br>21-27<br>≥27<br><br><21<br>21-27<br>≥27<br><br><21<br>21-27<br>≥27       | 2.79 (1.58-4.95)<br>1.00<br>1.45 (0.70-2.98)<br>1.54 (1.12-2.13)<br>1.00<br>0.58 (0.31-1.08)<br>1.38 (1.10-1.74)<br>1.00<br>0.78 (0.50-1.21)                                                 | Age, sex, exercise, smoking status                                                                  |
| Tognon G et al, 2011, Sweden | Gerontological and Geriatric Population Studies in          | 1971-2000 - 2009, ~23 years follow-up   | 1037 men and women, age 70 years: 630 deaths  | NA            |                                                                                                                                                                                                                                                      |                                                                                        | BMI                                                                                                                                                                         | <20<br>20-<30<br>>30                                                            | 1.32 (0.90-1.96)<br>1.00<br>0.94 (0.72-1.24)                                                                                                                                                 | Male gender, waist circumference, low physical activity, marital status, smoking status, education, |

|                                       |                               |                                         |                                                                                         |               |    |                                                          |                                                                                                                                                                |                                                                                                                                                                                                                          |                                                                                                                                                                                                                                                                                                                                                  |                                                                                                                                                                             |
|---------------------------------------|-------------------------------|-----------------------------------------|-----------------------------------------------------------------------------------------|---------------|----|----------------------------------------------------------|----------------------------------------------------------------------------------------------------------------------------------------------------------------|--------------------------------------------------------------------------------------------------------------------------------------------------------------------------------------------------------------------------|--------------------------------------------------------------------------------------------------------------------------------------------------------------------------------------------------------------------------------------------------------------------------------------------------------------------------------------------------|-----------------------------------------------------------------------------------------------------------------------------------------------------------------------------|
|                                       | Gothenburg                    |                                         |                                                                                         |               |    |                                                          |                                                                                                                                                                |                                                                                                                                                                                                                          |                                                                                                                                                                                                                                                                                                                                                  | birth cohort                                                                                                                                                                |
| Bessonova L et al, 2011, USA          | California Teachers Study     | 1995-1996 – 2007, ~11.5 years follow-up | 115433 women, mean age 53.1 years: 10574 deaths<br><br>75582 never smokers: 5962 deaths | Self-reported | No | First year of follow-up excluded                         | BMI, all<br><br>BMI, never smokers<br><br>BMI, ever smokers                                                                                                    | <18.5<br>18.5-24.9<br>25-29.9<br>≥30<br><18.5<br>18.5-24.9<br>25-29.9<br>≥30<br><18.5<br>18.5-24.9<br>25-29.9<br>≥30                                                                                                     | 1.33 (1.20-1.47)<br>1.00<br>1.04 (0.98-1.10)<br>1.27 (1.19-1.37)<br>1.35 (1.18-1.55)<br>1.00<br>1.07 (1.00-1.15)<br>1.34 (1.22-1.47)<br>1.39 (1.19-1.63)<br>1.00<br>1.00 (0.92-1.09)<br>1.17 (1.05-1.31)                                                                                                                                         | Age, race/ ethnicity, HRT, physical activity, diabetes, hypertension, heart attack, stroke, any cancer, alcohol, smoking status, fat, weight change from age 18 to baseline |
| Strand BH et al, 2012, United Kingdom | The British 1946 birth cohort | 1972 – 2006, 40 years follow-up         | 1471 men and 1476 women, age 20 years: 332 deaths                                       | Self-reported | No | No                                                       | BMI (age 20), men<br><br>BMI (age 20), women                                                                                                                   | 17.7<br>20.1<br>22.6<br>25.1<br>27.6<br>16.1<br>18.9<br>21.8<br>24.8<br>28.0                                                                                                                                             | 7.00 (1.94-25.2)<br>1.00 (0.43-2.31)<br>1.00<br>1.11 (0.45-2.70)<br>1.00 (0.37-2.71)<br>0.43 (0.06-3.22)<br>0.55 (0.21-1.43)<br>1.00<br>0.56 (0.23-1.37)<br>1.01 (0.37-2.79)                                                                                                                                                                     | Father's occupation, education, smoking status                                                                                                                              |
| Pan WH et al, 2012, Taiwan            | MJ Health Examination Cohort  | 1994-1996 – 2007, 11.7 years follow-up  | 111949 men and women, age ≥20 years: 5345 deaths                                        | Measured      | No | First 5 years of follow-up excluded in the main analysis | BMI, men, age 20-39 years<br><br>BMI, men, age 40-59 years<br><br>BMI, men age ≥60 years<br><br>BMI, women, age 20-39 years<br><br>BMI, women, age 40-59 years | <18.5<br>18.5-23.9<br>24.0-26.9<br>≥27.0<br><18.5<br>18.5-23.9<br>24.0-26.9<br>≥27.0<br><18.5<br>18.5-23.9<br>24.0-26.9<br>≥27.0<br><18.5<br>18.5-23.9<br>24.0-26.9<br>≥27.0<br><18.5<br>18.5-23.9<br>24.0-26.9<br>≥27.0 | 1.00<br>0.77 (0.45-1.32)<br>0.86 (0.49-1.51)<br>1.18 (0.66-2.11)<br>1.00<br>0.73 (0.49-1.10)<br>0.76 (0.51-1.15)<br>0.91 (0.60-1.38)<br>1.00<br>0.81 (0.67-0.97)<br>0.78 (0.64-0.94)<br>0.83 (0.67-1.02)<br>1.00<br>0.76 (0.47-1.23)<br>1.32 (0.74-2.36)<br>1.44 (0.73-2.83)<br>1.00<br>0.65 (0.40-1.06)<br>0.77 (0.47-1.26)<br>0.96 (0.59-1.59) | Age, age squared, smoking status                                                                                                                                            |

|                                  |                               |                                |                                                     |                                       |    |                                  |                                |                                                                                                      |                                                                                                                                                                                                                                                                  |                                                                                                                                                                                                                                                |
|----------------------------------|-------------------------------|--------------------------------|-----------------------------------------------------|---------------------------------------|----|----------------------------------|--------------------------------|------------------------------------------------------------------------------------------------------|------------------------------------------------------------------------------------------------------------------------------------------------------------------------------------------------------------------------------------------------------------------|------------------------------------------------------------------------------------------------------------------------------------------------------------------------------------------------------------------------------------------------|
|                                  |                               |                                |                                                     |                                       |    |                                  | BMI, women age $\geq 60$ years | <18.5<br>18.5-23.9<br>24.0-26.9<br>$\geq 27.0$                                                       | 1.00<br>0.58 (0.44-0.75)<br>0.54 (0.41-0.71)<br>0.64 (0.49-0.85)                                                                                                                                                                                                 |                                                                                                                                                                                                                                                |
| Belegoli AM et al, 2012, Brazil  | Bambui Cohort Study of Ageing | 1997-2007, 8.9 years follow-up | 1450 men and women, age $\geq 60$ years: 521 deaths | Measured                              | No | No                               | BMI                            | <18.5<br>18.5-24.9<br>25.0-29.9<br>$\geq 30.0$                                                       | 1.54 (1.02-1.89)<br>1.00<br>0.76 (0.61-0.93)<br>0.85 (0.64-1.14)                                                                                                                                                                                                 | Age, sex, Chagas disease, current smoking, serum B-type natriuretic peptide, major ECG abnormalities, SBP, total cholesterol, diabetes, serum creatinine, physical activity, education, monthly household income, anti-hypertensive medication |
| Zunzunegui MV et al, 2012, Spain | The Aging in Leganes cohort   | 1993-2009, 16 years follow-up  | 1008 men and women, age $\geq 65$ years: 672 deaths | Self-reported weight, measured height | No | First year of follow-up excluded | BMI, spline                    | 15.0<br>17.5<br>20.0<br>22.5<br>25.0<br>27.5<br>30.0<br>32.5<br>35.0<br>37.5<br>40.0<br>42.5<br>45.0 | 1.79 (1.17-2.71)<br>1.56 (1.12-2.17)<br>1.37 (1.07-1.75)<br>1.22 (1.03-1.44)<br>1.11 (0.99-1.23)<br>1.03 (0.98-1.09)<br>1.00 (0.99-1.01)<br>1.01 (0.97-1.06)<br>1.08 (0.96-1.21)<br>1.21 (0.96-1.52)<br>1.45 (1.00-2.12)<br>1.87 (1.05-3.33)<br>2.61 (1.13-6.01) | Age*sex interaction, comorbidity, activity of daily living disability, smoking status, physical activity, education                                                                                                                            |
|                                  |                               |                                |                                                     |                                       |    |                                  | BMI, all                       | <18.5<br>18.5-24.9<br>25.0-29.9<br>30.0-34.9<br>$\geq 35.0$                                          | 2.84 (1.58-5.11)<br>1.15 (0.90-1.46)<br>1.04 (0.83-1.31)<br>1.00<br>1.25 (0.85-1.84)                                                                                                                                                                             |                                                                                                                                                                                                                                                |
|                                  |                               |                                |                                                     |                                       |    |                                  | BMI, men                       | <18.5<br>18.5-24.9<br>25.0-29.9<br>30.0-34.9<br>$\geq 35.0$                                          | 4.79 (2.27-10.11)<br>1.52 (1.07-2.18)<br>1.39 (0.98-1.96)<br>1.00<br>1.16 (0.41-3.27)                                                                                                                                                                            |                                                                                                                                                                                                                                                |
|                                  |                               |                                |                                                     |                                       |    |                                  | BMI, women                     | <18.5<br>18.5-24.9<br>25.0-29.9<br>30.0-34.9<br>$\geq 35.0$                                          | 1.55 (0.56-4.31)<br>0.90 (0.63-1.27)<br>0.81 (0.59-1.11)<br>1.00<br>1.09 (0.71-1.68)                                                                                                                                                                             |                                                                                                                                                                                                                                                |

|                          |                          |                                        |                                                                                                                                                                                             |               |                       |                                                    |                                                                                                                                                                             |                                                                                                                                                                                                                                                                                                                                                                 |                                                                                                                                                                                                                                                                                                                                                                                                                                                                                                                                                                |                                                                                                                                                                                                                                                                                                                       |
|--------------------------|--------------------------|----------------------------------------|---------------------------------------------------------------------------------------------------------------------------------------------------------------------------------------------|---------------|-----------------------|----------------------------------------------------|-----------------------------------------------------------------------------------------------------------------------------------------------------------------------------|-----------------------------------------------------------------------------------------------------------------------------------------------------------------------------------------------------------------------------------------------------------------------------------------------------------------------------------------------------------------|----------------------------------------------------------------------------------------------------------------------------------------------------------------------------------------------------------------------------------------------------------------------------------------------------------------------------------------------------------------------------------------------------------------------------------------------------------------------------------------------------------------------------------------------------------------|-----------------------------------------------------------------------------------------------------------------------------------------------------------------------------------------------------------------------------------------------------------------------------------------------------------------------|
| Park SY et al, 2012, USA | Multiethnic Cohort Study | 1993-1996 - 2007, 12.5 years follow-up | 183211 men and women, age 45-75 years: 35664 deaths<br><br>21893 and 48108 never smokers: 2972/ 5152 deaths<br><br>21540 and 47601 never smokers, excluding first 3 years: 2619/4645 deaths | Self-reported | Cancer, heart disease | Exclusion of first 3 years in sensitivity analyses | <p>BMI, men, all</p> <p>BMI, excluding baseline cancer and heart disease</p> <p>BMI, further excluding ever smokers</p> <p>BMI, further excluding deaths within 3 years</p> | <p>&lt;18.5<br/>18.5-22.9<br/>23-24.9<br/>25-27.4<br/>27.5-29.9<br/>30-34.9<br/>≥35</p> <p>&lt;18.5<br/>18.5-22.9<br/>23-24.9<br/>25-27.4<br/>27.5-29.9<br/>30-34.9<br/>≥35</p> <p>&lt;18.5<br/>18.5-22.9<br/>23-24.9<br/>25-27.4<br/>27.5-29.9<br/>30-34.9<br/>≥35</p> <p>&lt;18.5<br/>18.5-22.9<br/>23-24.9<br/>25-27.4<br/>27.5-29.9<br/>30-34.9<br/>≥35</p> | <p>1.98 (1.75-2.23)<br/>1.25 (1.20-1.31)<br/>1.00<br/>0.97 (0.93-1.01)<br/>1.02 (0.97-1.07)<br/>1.23 (1.17-1.29)<br/>1.60 (1.48-1.72)<br/>1.97 (1.70-2.30)<br/>1.24 (1.17-1.31)<br/>1.00<br/>0.99 (0.94-1.04)<br/>1.05 (0.99-1.12)<br/>1.28 (1.20-1.36)<br/>1.80 (1.64-1.97)<br/>1.42 (0.98-2.07)<br/>1.06 (0.94-1.19)<br/>1.00<br/>0.94 (0.84-1.05)<br/>1.14 (1.01-1.29)<br/>1.45 (1.27-1.65)<br/>2.37 (1.99-2.82)<br/>1.25 (0.81-1.91)<br/>1.06 (0.93-1.20)<br/>1.00<br/>0.97 (0.86-1.09)<br/>1.20 (1.05-1.37)<br/>1.56 (1.36-1.79)<br/>2.71 (2.26-3.26)</p> | Age, ethnicity, alcohol, smoking status, average number of cigarettes, squared average number of cigarettes, number of years smoked, number of years since quitting, interactions between ethnicity and smoking status, average number of cigarettes, squared average number of cigarettes and number of years smoked |
|--------------------------|--------------------------|----------------------------------------|---------------------------------------------------------------------------------------------------------------------------------------------------------------------------------------------|---------------|-----------------------|----------------------------------------------------|-----------------------------------------------------------------------------------------------------------------------------------------------------------------------------|-----------------------------------------------------------------------------------------------------------------------------------------------------------------------------------------------------------------------------------------------------------------------------------------------------------------------------------------------------------------|----------------------------------------------------------------------------------------------------------------------------------------------------------------------------------------------------------------------------------------------------------------------------------------------------------------------------------------------------------------------------------------------------------------------------------------------------------------------------------------------------------------------------------------------------------------|-----------------------------------------------------------------------------------------------------------------------------------------------------------------------------------------------------------------------------------------------------------------------------------------------------------------------|



|  |  |  |  |  |  |  |                                                                                                                                                                                                                                                                                                                                                                                                                                                                                                                                                                                                                                                                                                                           |                                                                                                                                                                                                                                                                                                                                                                                                                                                                                                                                                                                                                                                                                                        |  |
|--|--|--|--|--|--|--|---------------------------------------------------------------------------------------------------------------------------------------------------------------------------------------------------------------------------------------------------------------------------------------------------------------------------------------------------------------------------------------------------------------------------------------------------------------------------------------------------------------------------------------------------------------------------------------------------------------------------------------------------------------------------------------------------------------------------|--------------------------------------------------------------------------------------------------------------------------------------------------------------------------------------------------------------------------------------------------------------------------------------------------------------------------------------------------------------------------------------------------------------------------------------------------------------------------------------------------------------------------------------------------------------------------------------------------------------------------------------------------------------------------------------------------------|--|
|  |  |  |  |  |  |  | <p>BMI, women, all</p> <p>&lt;18.5<br/>18.5-22.9<br/>23-24.9<br/>25-27.4<br/>27.5-29.9<br/>30-34.9<br/>≥35</p> <p>BMI, excluding baseline cancer and heart disease</p> <p>&lt;18.5<br/>18.5-22.9<br/>23-24.9<br/>25-27.4<br/>27.5-29.9<br/>30-34.9<br/>≥35</p> <p>BMI, further excluding ever smokers</p> <p>&lt;18.5<br/>18.5-22.9<br/>23-24.9<br/>25-27.4<br/>27.5-29.9<br/>30-34.9<br/>≥35</p> <p>BMI, further excluding deaths within 3 years</p> <p>&lt;18.5<br/>18.5-22.9<br/>23-24.9<br/>25-27.4<br/>27.5-29.9<br/>30-34.9<br/>≥35</p> <p>BMI, men, healthy never smokers (excluding first 3 years), African Americans</p> <p>&lt;18.5<br/>18.5-22.9<br/>23-24.9<br/>25-27.4<br/>27.5-29.9<br/>30-34.9<br/>≥35</p> | <p>1.88 (1.72-2.04)<br/>1.13 (1.07-1.19)<br/>1.00<br/>1.04 (0.98-1.10)<br/>1.12 (1.06-1.19)<br/>1.25 (1.18-1.33)<br/>1.63 (1.53-1.74)<br/>1.84 (1.66-2.04)<br/>1.12 (1.05-1.19)<br/>1.00<br/>1.03 (0.97-1.11)<br/>1.13 (1.05-1.22)<br/>1.28 (1.19-1.37)<br/>1.73 (1.59-1.87)<br/>1.71 (1.47-1.99)<br/>1.07 (0.98-1.17)<br/>1.00<br/>1.09 (0.99-1.20)<br/>1.20 (1.08-1.33)<br/>1.39 (1.26-1.54)<br/>1.94 (1.73-2.19)<br/>1.66 (1.42-1.95)<br/>1.07 (0.97-1.18)<br/>1.00<br/>1.10 (0.99-1.21)<br/>1.21 (1.08-1.35)<br/>1.40 (1.26-1.55)<br/>1.97 (1.74-2.23)<br/>1.51 (0.20-11.17)<br/>1.34 (0.92-1.96)<br/>1.00<br/>1.08 (0.78-1.48)<br/>1.64 (1.18-2.28)<br/>1.87 (1.36-2.58)<br/>2.72 (1.81-4.08)</p> |  |
|  |  |  |  |  |  |  | <p>BMI, men, healthy never smokers (excluding first 3 years), Native Hawaiians</p> <p>&lt;18.5<br/>18.5-22.9<br/>23-24.9<br/>25-27.4<br/>27.5-29.9<br/>30-34.9<br/>≥35</p> <p>BMI, men, healthy never</p> <p>&lt;18.5</p>                                                                                                                                                                                                                                                                                                                                                                                                                                                                                                 | <p>0.70 (0.09-5.40)<br/>1.27 (0.64-2.51)<br/>1.00<br/>1.16 (0.65-2.07)<br/>1.18 (0.66-2.12)<br/>1.67 (0.94-2.97)<br/>3.05 (1.69-5.54)<br/>1.31 (0.74-2.31)</p>                                                                                                                                                                                                                                                                                                                                                                                                                                                                                                                                         |  |

|  |  |  |  |  |  |                                                                                 |                                                                         |                                                                                                                              |  |
|--|--|--|--|--|--|---------------------------------------------------------------------------------|-------------------------------------------------------------------------|------------------------------------------------------------------------------------------------------------------------------|--|
|  |  |  |  |  |  | smokers (excluding first 3 years), Japanese Americans                           | 18.5-22.9<br>23-24.9<br>25-27.4<br>27.5-29.9<br>30-34.9<br>≥35          | 1.08 (0.89-1.31)<br>1.00<br>1.01 (0.82-1.24)<br>1.30 (0.99-1.71)<br>1.89 (1.35-2.65)<br>3.97 (2.08-7.58)                     |  |
|  |  |  |  |  |  | BMI, men, healthy never smokers (excluding first 3 years), Latinos              | <18.5<br>18.5-22.9<br>23-24.9<br>25-27.4<br>27.5-29.9<br>30-34.9<br>≥35 | 0.93 (0.29-2.95)<br>0.90 (0.66-1.22)<br>1.00<br>0.82 (0.65-1.03)<br>0.98 (0.77-1.25)<br>1.18 (0.91-1.52)<br>1.82 (1.27-2.62) |  |
|  |  |  |  |  |  | BMI, men, healthy never smokers (excluding first 3 years), Whites               | <18.5<br>18.5-22.9<br>23-24.9<br>25-27.4<br>27.5-29.9<br>30-34.9<br>≥35 | 1.57 (0.57-4.30)<br>1.05 (0.79-1.39)<br>1.00<br>1.01 (0.78-1.30)<br>1.08 (0.79-1.46)<br>1.61 (1.18-2.18)<br>3.31 (2.26-4.85) |  |
|  |  |  |  |  |  | BMI, women, healthy never smokers (excluding first 3 years), African Americans  | <18.5<br>18.5-22.9<br>23-24.9<br>25-27.4<br>27.5-29.9<br>30-34.9<br>≥35 | 1.88 (1.09-3.24)<br>1.22 (0.94-1.58)<br>1.00<br>1.06 (0.84-1.34)<br>1.23 (0.97-1.54)<br>1.45 (1.16-1.80)<br>1.74 (1.37-2.20) |  |
|  |  |  |  |  |  | BMI, women, healthy never smokers (excluding first 3 years), Native Hawaiians   | <18.5<br>18.5-22.9<br>23-24.9<br>25-27.4<br>27.5-29.9<br>30-34.9<br>≥35 | 1.52 (0.53-4.34)<br>0.98 (0.63-1.52)<br>1.00<br>0.91 (0.59-1.41)<br>1.24 (0.79-1.93)<br>1.34 (0.89-2.01)<br>2.10 (1.36-3.24) |  |
|  |  |  |  |  |  | BMI, women, healthy never smokers (excluding first 3 years), Japanese Americans | <18.5<br>18.5-22.9<br>23-24.9<br>25-27.4<br>27.5-29.9<br>30-34.9<br>≥35 | 1.59 (1.30-1.94)<br>1.01 (0.88-1.17)<br>1.00<br>1.05 (0.87-1.25)<br>1.16 (0.92-1.47)<br>1.35 (1.02-1.79)<br>1.77 (0.96-3.24) |  |
|  |  |  |  |  |  | BMI, women, healthy never smokers (excluding first 3 years), Japanese Americans | <18.5<br>18.5-22.9                                                      | 1.05 (0.49-2.25)<br>1.34 (1.07-1.68)                                                                                         |  |

|                                      |                                  |                                        |                                                                      |               |                                   |                                      |                                                                     |                                                                         |                                                                                                                              |                                                                                                                                 |
|--------------------------------------|----------------------------------|----------------------------------------|----------------------------------------------------------------------|---------------|-----------------------------------|--------------------------------------|---------------------------------------------------------------------|-------------------------------------------------------------------------|------------------------------------------------------------------------------------------------------------------------------|---------------------------------------------------------------------------------------------------------------------------------|
|                                      |                                  |                                        |                                                                      |               |                                   |                                      | years), Latinos                                                     | 23-24.9<br>25-27.4<br>27.5-29.9<br>30-34.9<br>≥35                       | 1.00<br>1.32 (1.07-1.62)<br>1.34 (1.08-1.67)<br>1.53 (1.23-1.89)<br>2.27 (1.77-2.91)                                         |                                                                                                                                 |
|                                      |                                  |                                        |                                                                      |               |                                   |                                      | BMI, women, healthy never smokers (excluding first 3 years), Whites | <18.5<br>18.5-22.9<br>23-24.9<br>25-27.4<br>27.5-29.9<br>30-34.9<br>≥35 | 1.84 (1.22-2.78)<br>0.93 (0.74-1.17)<br>1.00<br>1.06 (0.84-1.34)<br>1.16 (0.89-1.51)<br>1.29 (1.00-1.66)<br>2.26 (1.68-3.05) |                                                                                                                                 |
| Katzmarzyk PT et al, 2012, Canada    | Canadian Heart Health Surveys    | 1986-1995 – 2004, 13.9 years follow-up | 10522 men and women, age 18-74 years: 1149 deaths                    | Measured      | No                                | First 6 months of follow-up excluded | BMI, men                                                            | <18.0<br>18.0-24.9<br>25.0-29.9<br>30-34.9<br>≥35                       | 0.84 (0.41-1.72)<br>1.00<br>0.99 (0.83-1.18)<br>1.16 (0.94-1.45)<br>1.41 (0.97-2.05)                                         | Age, exam year, smoking status, alcohol, education                                                                              |
|                                      |                                  |                                        |                                                                      |               |                                   |                                      | BMI, women                                                          | <18.0<br>18.0-24.9<br>25.0-29.9<br>30-34.9<br>≥35                       | 1.80 (1.07-3.03)<br>1.00<br>1.16 (0.92-1.46)<br>1.47 (1.12-1.93)<br>1.85 (1.33-2.56)                                         |                                                                                                                                 |
| Park Y et al, 2012, USA              | NIH-AARP Diet and Health Study   | 1995-1996 - 2009, 13 years follow-up   | 16471 non-Hispanic black men and women, age 50-71 years: 2609 deaths | Self-reported | Prevalent cancer or heart disease | No                                   | BMI, all, never smokers                                             | 15-<20<br>20-<25<br>25-<30<br>30-<35<br>35-<40<br>40-50                 | 1.97 (1.24-3.13)<br>1.00<br>0.97 (0.78-1.20)<br>1.31 (1.04-1.65)<br>1.67 (1.27-2.21)<br>2.23 (1.61-3.07)                     | Age, sex, education, marital status, smoking status, cigarettes per day, physical activity, alcohol, menopausal hormone therapy |
|                                      |                                  |                                        |                                                                      |               |                                   |                                      | BMI, men                                                            | 15-<20<br>20-<25<br>25-<30<br>30-<35<br>35-<40<br>40-50                 | 2.12 (1.00-4.52)<br>1.00<br>1.27 (0.91-1.78)<br>1.56 (1.07-2.28)<br>2.48 (1.53-4.05)<br>2.80 (1.46-5.39)                     |                                                                                                                                 |
|                                      |                                  |                                        |                                                                      |               |                                   |                                      | BMI, women                                                          | 15-<20<br>20-<25<br>25-<30<br>30-<35<br>35-<40<br>40-50                 | 1.85 (1.03-3.33)<br>1.00<br>0.78 (0.59-1.04)<br>1.17 (0.88-1.57)<br>1.35 (0.96-1.90)<br>1.93 (1.33-2.81)                     |                                                                                                                                 |
| Fontaine KR et al, 2012, Puerto Rico | Puerto Rico Heart Health Program | 1965-1980, 12 years follow-up          | 5187 hispanic men, mean age 54.4 years                               | NA            | Prevalent coronary heart disease  | No                                   | BMI, age 18-<60                                                     | <18.5<br>18.5-<25<br>25-<30                                             | 1.52 (1.07-2.17)<br>1.00<br>0.97 (0.84-1.12)                                                                                 | Age                                                                                                                             |

|                              |                                                   |                                      |                                                           |               |          |    |                 |                                                               |                                                                                                                              |                                                                                                         |
|------------------------------|---------------------------------------------------|--------------------------------------|-----------------------------------------------------------|---------------|----------|----|-----------------|---------------------------------------------------------------|------------------------------------------------------------------------------------------------------------------------------|---------------------------------------------------------------------------------------------------------|
|                              |                                                   |                                      | (35-79): 2619 deaths                                      |               | excluded |    | BMI, age 60-<70 | 30-<35<br>≥35<br><18.5<br>18.5-<25<br>25-<30<br>30-<35<br>≥35 | 1.09 (0.88-1.34)<br>1.32 (0.70-2.48)<br>1.38 (1.04-1.83)<br>1.00<br>1.09 (0.96-1.25)<br>1.19 (0.98-1.44)<br>1.64 (0.94-2.85) |                                                                                                         |
|                              |                                                   |                                      |                                                           |               |          |    | BMI, age ≥70    | <18.5<br>18.5-<25<br>25-<30<br>30-<35<br>≥35                  | 1.60 (1.08-2.37)<br>1.00<br>1.01 (0.81-1.26)<br>1.24 (0.88-1.73)<br>1.38 (0.44-4.35)                                         |                                                                                                         |
| Fontaine KR et al, 2012, USA | San Antonio Heart Study                           | 1979 - 2000, 14 years follow-up      | 2758 men and women, mean age 43.5 years: 923 deaths       | NA            | No       | No | BMI, age 18-<60 | <18.5<br>18.5-<25<br>25-<30<br>30-<35<br>≥35                  | 2.02 (0.49-8.30)<br>1.00<br>0.96 (0.72-1.28)<br>0.99 (0.71-1.40)<br>0.97 (0.66-1.42)                                         | Age                                                                                                     |
|                              |                                                   |                                      |                                                           |               |          |    | BMI, age 60-<70 | <18.5<br>18.5-<25<br>25-<30<br>30-<35<br>≥35                  | 2.51 (1.00-6.27)<br>1.00<br>1.08 (0.82-1.42)<br>0.89 (0.65-1.42)<br>1.20 (0.85-1.72)                                         |                                                                                                         |
|                              |                                                   |                                      |                                                           |               |          |    | BMI, age ≥70    | <18.5<br>18.5-<25<br>25-<30<br>30-<35<br>≥35                  | 1.88 (0.44-8.04)<br>1.00<br>1.08 (0.74-1.59)<br>0.84 (0.53-1.32)<br>0.95 (0.58-1.56)                                         |                                                                                                         |
| Fontaine KR et al, 2012, USA | The Sacramento Area Latino Study on Aging (SALSA) | 1998-1999 – 2006, 9 years follow-up  | 1625 men and women, age ≥60 years (mean 70.4): 419 deaths | NA            | No       | No | BMI, age 60-<70 | <18.5<br>18.5-<25<br>25-<30<br>30-<35<br>≥35                  | -<br>1.00<br>0.87 (0.50-1.53)<br>0.81 (0.46-1.46)<br>1.44 (0.80-2.59)                                                        | Age                                                                                                     |
|                              |                                                   |                                      |                                                           |               |          |    | BMI, age ≥70    | <18.5<br>18.5-<25<br>25-<30<br>30-<35<br>≥35                  | -<br>1.00<br>0.72 (0.55-0.94)<br>0.60 (0.45-0.82)<br>0.91 (0.65-1.21)                                                        |                                                                                                         |
| Jerant A et al, 2012, USA    | Medical Expenditures Panel Surveys                | 2000-2005 -2006, 3.9 years follow-up | 50994 men and women, age 18-90 years: 1683 deaths         | Self-reported | No       | No | BMI             | <20<br>20-<25<br>25-<30<br>30-<35<br>≥35                      | 1.78 (1.44-2.20)<br>1.00<br>0.80 (0.60-0.92)<br>0.93 (0.78-1.11)<br>1.26 (1.00-1.59)                                         | Age, sex, race/ethnicity, education, income, health insurance, residence, census region, smoking status |

|                                          |                                                        |                                              |                                                                                                   |                                                |                                                                                                                                                |                                                             |                                                                               |                                                                                                                                               |                                                                                                                                                                                                                                                                      |                                                                                                |
|------------------------------------------|--------------------------------------------------------|----------------------------------------------|---------------------------------------------------------------------------------------------------|------------------------------------------------|------------------------------------------------------------------------------------------------------------------------------------------------|-------------------------------------------------------------|-------------------------------------------------------------------------------|-----------------------------------------------------------------------------------------------------------------------------------------------|----------------------------------------------------------------------------------------------------------------------------------------------------------------------------------------------------------------------------------------------------------------------|------------------------------------------------------------------------------------------------|
| De Hollander EL et al, 2012, Netherlands | Survey in Europe on Nutrition and the Elderly (SENECA) | 1988-1989 - 1999, 10 years follow-up         | 1980 men and women, age 70-75 years: 751 deaths                                                   | Measured                                       | Chronic diseases at baseline excluded in sensitivity analyses                                                                                  | First 2 years of follow-up excluded in sensitivity analyses | BMI                                                                           | <20<br>20-25<br>25-30<br>≥30                                                                                                                  | 1.06 (0.73-1.55)<br>1.00<br>0.92 (0.78-1.09)<br>1.05 (0.89-1.29)                                                                                                                                                                                                     | Age, sex, smoking status, education                                                            |
| Chen Z et al, 2012, China                | 45 Areas of China                                      | 1990-1991 – 2006, 15 years follow-up         | 142214 men, age 45-79 years: 17800 deaths                                                         | Measured                                       | Chronic obstructive pulmonary disease, asthma, heart disease, stroke, cancer, peptic ulcer, cirrhosis, kidney disease, hepatitis, tuberculosis | Excluded first 5 years of follow-up                         | BMI                                                                           | 15.0-<18.5<br>18.5-<20.0<br>20.0-<22.5<br>22.5-<25.0<br>25.0-<27.5<br>27.5-<30.0<br>30.0-<35.0                                                | 1.16 (1.10-1.22)<br>1.07 (1.02-1.12)<br>1.03 (0.99-1.07)<br>1.00<br>1.09 (1.02-1.16)<br>1.21 (1.09-1.34)<br>1.43 (1.21-1.68)                                                                                                                                         | Age, area, smoking status, alcohol, education                                                  |
| Claessen H et al, 2012, Germany          | German Construction Workers Cohort                     | 1986-1992 – 2007-2008, 17.24 years follow-up | 19476 men, age 26-65 years: 2211 deaths                                                           | Measured                                       | No                                                                                                                                             | No                                                          | BMI                                                                           | <25.0<br>25.0-29.9<br>≥30.0                                                                                                                   | 1.00<br>0.83 (0.76-0.92)<br>0.99 (0.88-1.12)                                                                                                                                                                                                                         | Age, nationality, alcohol, smoking status                                                      |
| Rhee CW et al, 2012, Korea               | Seoul Male Cohort Study                                | 1993-2008, 15 years follow-up                | 14533 men, age 40-59 years: 990 deaths                                                            | Self-reported                                  | No                                                                                                                                             | No                                                          | BMI                                                                           | <18.5<br>18.5-22.9<br>23.0-24.9<br>≥25.0                                                                                                      | 0.98 (0.82-1.18)<br>1.00<br>1.00 (0.85-1.19)<br>1.63 (0.97-2.74)                                                                                                                                                                                                     | Age, smoking status, alcohol, regular exercise, sleep hours, education, hypertension, diabetes |
| Cohen SS et al, 2012, USA                | Southern Community Cohort Study                        | 2002-2009 - 2011, 8.9 years follow-up        | 22014 black and 9343 white men<br>30810 black and 14447 white women, age 40-79 years: 5427 deaths | Self-reported, measured in 25% of participants | Exclusion of participant with cancer, heart disease and stroke in sensitivity analyses                                                         | Excluding first 12 months of follow-up                      | BMI, black men, total mortality<br><br>BMI, white men<br><br>BMI, black women | <20<br>20-24.9<br>25-29.9<br>30-34.9<br>35-39.9<br>≥40<br><20<br>20-24.9<br>25-29.9<br>30-34.9<br>35-39.9<br>≥40<br><20<br>20-24.9<br>25-29.9 | 1.47 (1.24-1.74)<br>1.00<br>0.80 (0.72-0.90)<br>0.70 (0.61-0.80)<br>0.90 (0.74-1.08)<br>1.13 (0.89-1.43)<br>0.96 (0.67-1.39)<br>1.00<br>0.72 (0.60-0.85)<br>0.75 (0.60-0.93)<br>1.12 (0.87-1.45)<br>1.37 (1.02-1.84)<br>1.71 (1.35-2.17)<br>1.00<br>0.80 (0.69-0.94) | Age, education, income, source, cigarette smoking status and packs per day, alcohol            |

|                                    |                                                 |                                               |                                                   |               |                                                       |                                                                        |                               |                                                                                                                                                                                                         |                                                                                                                                                                                                                                                                                                                                                                                              |                                                 |
|------------------------------------|-------------------------------------------------|-----------------------------------------------|---------------------------------------------------|---------------|-------------------------------------------------------|------------------------------------------------------------------------|-------------------------------|---------------------------------------------------------------------------------------------------------------------------------------------------------------------------------------------------------|----------------------------------------------------------------------------------------------------------------------------------------------------------------------------------------------------------------------------------------------------------------------------------------------------------------------------------------------------------------------------------------------|-------------------------------------------------|
|                                    |                                                 |                                               |                                                   |               |                                                       |                                                                        |                               | 30-34.9<br>35-39.9<br>≥40<br><20<br>20-24.9<br>25-29.9<br>30-34.9<br>35-39.9<br>≥40<br><20<br>20-24.9<br>25-29.9<br>30-34.9<br>35-39.9<br>≥40<br><20<br>20-24.9<br>25-29.9<br>30-34.9<br>35-39.9<br>≥40 | 0.66 (0.56-0.78)<br>0.72 (0.60-0.86)<br>0.87 (0.72-1.04)<br>1.40 (1.04-1.89)<br>1.00<br>0.96 (0.77-1.18)<br>1.07 (0.86-1.34)<br>1.03 (0.79-1.34)<br>1.47 (1.15-1.89)<br>2.06 (1.53-2.79)<br>1.00<br>0.72 (0.61-0.86)<br>0.66 (0.54-0.80)<br>0.72 (0.58-0.89)<br>1.09 (0.89-1.35)<br>0.81 (0.35-1.87)<br>1.00<br>0.84 (0.62-1.13)<br>0.85 (0.62-1.17)<br>1.12 (0.79-1.59)<br>1.74 (1.24-2.41) |                                                 |
| Dobson A et al, 2012, Australia    | Australian Longitudinal Study on Women's Health | 1996 – NA, 10 years follow-up                 | 7438 women, age 71-79 years: 1734 deaths          | Self-reported | No                                                    | No                                                                     | BMI, women                    | 18.5-<25.0<br>25.0-<30.0<br>≥30.0                                                                                                                                                                       | 1.00<br>0.82 (0.72-0.92)<br>1.03 (0.88-1.21)                                                                                                                                                                                                                                                                                                                                                 | Age, smoking status, alcohol, physical activity |
| Dobson A et al, 2012, Australia    | Health in Men Study                             | 1996 – NA, 10 years follow-up                 | 6053 men, age 71-79 years: 2290 deaths            | Self-reported | No                                                    | No                                                                     | BMI, men                      | 18.5-<25.0<br>25.0-<30.0<br>≥30.0                                                                                                                                                                       | 1.00<br>0.87 (0.77-0.99)<br>0.98 (0.83-1.15)                                                                                                                                                                                                                                                                                                                                                 | Age, smoking status, alcohol, physical activity |
| Hotchkiss JW et al, 2013, Scotland | Scottish Health Survey Cohort                   | 1995, 1998, 2003 – 2008, 10.1 years follow-up | 19329 men and women, age 18-86 years: 1495 deaths | Measured      | Subjects with prior CHD or stroke hospital admissions | First 3-5 years excluded in sensitivity analyses, results not reported | BMI, men<br><br>BMI, women    | <18.5<br>18.5-<25<br>25-<30<br>≥30<br><18.5<br>18.5-<25<br>25-<30<br>≥30                                                                                                                                | 2.53 (1.58-4.06)<br>1.00<br>0.64 (0.54-0.77)<br>0.82 (0.67-1.01)<br>2.69 (1.80-4.03)<br>1.00<br>0.98 (0.81-1.18)<br>0.93 (0.75-1.15)                                                                                                                                                                                                                                                         | Age, smoking status, alcohol, year of survey    |
| Choi KM et al, 2013 Korea          | South-West Seoul Study                          | 1999 – 2009, 10.3 years follow-up             | 2317 men and women, age 60-92 years: 393 deaths   | Measured      | No                                                    | No                                                                     | BMI, no MetS<br><br>BMI, MetS | 18.5-<23<br>23-<25<br>≥25<br>18.5-<23<br>23-<25<br>≥25                                                                                                                                                  | 1.39 (1.00-1.94)<br>1.00<br>1.25 (0.88-1.76)<br>2.49 (1.61-3.83)<br>1.77 (1.16-2.69)<br>1.49 (1.04-2.14)                                                                                                                                                                                                                                                                                     | Age, sex, smoking status                        |

|                                |                                   |                                         |                                                                                                                                                                                   |               |                                       |                                                             |                                                                                                                                                                                                        |                                                                                                                                                                                                                                                                                                                                                                                         |                                                                                                                                                                                                                                                                                                                                                                                                                                                                                                              |                                                                              |
|--------------------------------|-----------------------------------|-----------------------------------------|-----------------------------------------------------------------------------------------------------------------------------------------------------------------------------------|---------------|---------------------------------------|-------------------------------------------------------------|--------------------------------------------------------------------------------------------------------------------------------------------------------------------------------------------------------|-----------------------------------------------------------------------------------------------------------------------------------------------------------------------------------------------------------------------------------------------------------------------------------------------------------------------------------------------------------------------------------------|--------------------------------------------------------------------------------------------------------------------------------------------------------------------------------------------------------------------------------------------------------------------------------------------------------------------------------------------------------------------------------------------------------------------------------------------------------------------------------------------------------------|------------------------------------------------------------------------------|
| Schmidt M et al, 2013, Denmark | Danish Military Conscripts        | 1977 – 2010, 31 years follow-up         | 6502 men, age 22 years: 507 deaths                                                                                                                                                | Measured      | No                                    | No                                                          | BMI                                                                                                                                                                                                    | <18.5<br>18.5-24.9<br>25.0-29.9<br>≥30.0                                                                                                                                                                                                                                                                                                                                                | 1.0 (0.7-1.5)<br>1.0<br>0.9 (0.7-1.2)<br>2.1 (1.3-3.5)                                                                                                                                                                                                                                                                                                                                                                                                                                                       | Cognitive test score, education                                              |
| Yano Y et al, 2013, Japan      | Jichi Medical School Cohort Study | 1992-1993 – 2002, 10.2 years follow-up  | 3641 men and women, mean age 53.7 years: 240 deaths                                                                                                                               | Measured      | No                                    | No                                                          | BMI                                                                                                                                                                                                    | 19.5<br>22.7<br>27.0                                                                                                                                                                                                                                                                                                                                                                    | 1.70 (1.24-2.33)<br>1.00<br>1.24 (0.91-1.70)                                                                                                                                                                                                                                                                                                                                                                                                                                                                 | Age, sex, current smoking, SBP, diabetes                                     |
| Masters RK et al, 2013, USA    | National Health Interview Survey  | 1986-2004 – 2006, ~12.4 years follow-up | 373185 men and 416908 women, age 25-84.9 years: 64443/ 58937 deaths                                                                                                               | Self-reported | No                                    | No                                                          | BMI, men<br><br>BMI, women                                                                                                                                                                             | 18.5-29.9<br>30-34.9<br>35-39.9<br>≥40<br>18.5-29.9<br>30-34.9<br>35-39.9<br>≥40                                                                                                                                                                                                                                                                                                        | 1.00<br>1.11 (1.09-1.14)<br>1.42 (1.36-1.49)<br>2.14 (1.97-2.33)<br>1.00<br>1.11 (1.08-1.14)<br>1.37 (1.32-1.43)<br>1.90 (1.80-2.00)                                                                                                                                                                                                                                                                                                                                                                         | Age, education, income, marital status, region of residence, race/ ethnicity |
| Ma J et al, 2013, USA          | National Health Interview Survey  | 1987-1995 – 2006, 16 years follow-up    | 210818 men and women, age 18-99 years: 34239 deaths<br><br>106964 never smokers: 14763 deaths<br><br>48261 former smokers: 10516 deaths<br><br>55593 current smokers: 8960 deaths | Self-reported | Prevalent fair or bad health excluded | First 5 years of follow-up excluded in sensitivity analyses | BMI, never smokers, age 18-44 years, men<br><br>BMI, former smokers<br><br>BMI, current smokers<br><br>BMI, never smokers, age 45-64 years, men<br><br>BMI, former smokers<br><br>BMI, current smokers | 15.0-18.4<br>18.5-24.9<br>25.0-29.9<br>30.0-34.9<br>≥35.0<br>15.0-18.4<br>18.5-24.9<br>25.0-29.9<br>30.0-34.9<br>≥35.0<br>15.0-18.4<br>18.5-24.9<br>25.0-29.9<br>30.0-34.9<br>≥35.0<br>15.0-18.4<br>18.5-24.9<br>25.0-29.9<br>30.0-34.9<br>≥35.0<br>15.0-18.4<br>18.5-24.9<br>25.0-29.9<br>30.0-34.9<br>≥35.0<br>15.0-18.4<br>18.5-24.9<br>25.0-29.9<br>30.0-34.9<br>≥35.0<br>15.0-18.4 | 0.85 (0.31-2.32)<br>1.00<br>0.94 (0.77-1.15)<br>1.22 (0.95-1.56)<br>3.18 (2.37-4.27)<br>0.57 (0.08-4.06)<br>0.92 (0.74-1.16)<br>0.87 (0.70-1.07)<br>1.33 (0.96-1.85)<br>2.15 (1.32-3.49)<br>3.17 (1.87-5.38)<br>2.29 (1.96-2.68)<br>1.96 (1.65-2.34)<br>2.71 (2.16-3.39)<br>4.03 (2.92-5.56)<br>0.38 (0.05-2.87)<br>1.00<br>1.10 (0.92-1.31)<br>1.62 (1.28-2.04)<br>2.40 (1.70-3.38)<br>3.96 (1.85-8.49)<br>1.44 (1.22-1.70)<br>1.43 (1.22-1.68)<br>1.94 (1.60-2.35)<br>2.50 (1.90-3.30)<br>6.47 (4.42-9.46) | Age, education, race                                                         |

|  |  |  |  |  |  |                                            |           |                  |  |
|--|--|--|--|--|--|--------------------------------------------|-----------|------------------|--|
|  |  |  |  |  |  |                                            | 18.5-24.9 | 3.37 (2.85-3.99) |  |
|  |  |  |  |  |  |                                            | 25.0-29.9 | 2.74 (2.31-3.25) |  |
|  |  |  |  |  |  |                                            | 30.0-34.9 | 3.25 (2.61-4.05) |  |
|  |  |  |  |  |  |                                            | ≥35.0     | 4.15 (2.88-5.99) |  |
|  |  |  |  |  |  | BMI, never smokers, age 65-99 years, men   | 15.0-18.4 | 1.42 (0.96-2.10) |  |
|  |  |  |  |  |  |                                            | 18.5-24.9 | 1.00             |  |
|  |  |  |  |  |  |                                            | 25.0-29.9 | 1.00 (0.91-1.09) |  |
|  |  |  |  |  |  |                                            | 30.0-34.9 | 1.22 (1.04-1.43) |  |
|  |  |  |  |  |  |                                            | ≥35.0     | 1.55 (1.15-2.08) |  |
|  |  |  |  |  |  | BMI, former smokers                        | 15.0-18.4 | 2.02 (1.31-3.12) |  |
|  |  |  |  |  |  |                                            | 18.5-24.9 | 1.25 (1.16-1.35) |  |
|  |  |  |  |  |  |                                            | 25.0-29.9 | 1.22 (1.12-1.32) |  |
|  |  |  |  |  |  |                                            | 30.0-34.9 | 1.37 (1.21-1.54) |  |
|  |  |  |  |  |  |                                            | ≥35.0     | 1.79 (1.40-2.30) |  |
|  |  |  |  |  |  | BMI, current smokers                       | 15.0-18.4 | 2.90 (2.02-4.17) |  |
|  |  |  |  |  |  |                                            | 18.5-24.9 | 1.93 (1.71-2.18) |  |
|  |  |  |  |  |  |                                            | 25.0-29.9 | 1.84 (1.64-2.07) |  |
|  |  |  |  |  |  |                                            | 30.0-34.9 | 2.72 (2.20-3.37) |  |
|  |  |  |  |  |  |                                            | ≥35.0     | 2.77 (1.11-6.96) |  |
|  |  |  |  |  |  | BMI, never smokers, age 18-44 years, women | 15.0-18.4 | 0.76 (0.43-1.34) |  |
|  |  |  |  |  |  |                                            | 18.5-24.9 | 1.00             |  |
|  |  |  |  |  |  |                                            | 25.0-29.9 | 1.46 (1.21-1.76) |  |
|  |  |  |  |  |  |                                            | 30.0-34.9 | 1.45 (1.09-1.92) |  |
|  |  |  |  |  |  |                                            | ≥35.0     | 2.04 (1.45-2.87) |  |
|  |  |  |  |  |  | BMI, former smokers                        | 15.0-18.4 | 1.86 (0.97-3.56) |  |
|  |  |  |  |  |  |                                            | 18.5-24.9 | 1.10 (0.86-1.42) |  |
|  |  |  |  |  |  |                                            | 25.0-29.9 | 1.33 (0.97-1.83) |  |
|  |  |  |  |  |  |                                            | 30.0-34.9 | 1.51 (0.93-2.43) |  |
|  |  |  |  |  |  |                                            | ≥35.0     | 1.08 (0.58-2.01) |  |
|  |  |  |  |  |  | BMI, current smokers                       | 15.0-18.4 | 3.15 (2.34-4.23) |  |
|  |  |  |  |  |  |                                            | 18.5-24.9 | 2.73 (2.34-3.19) |  |
|  |  |  |  |  |  |                                            | 25.0-29.9 | 2.51 (2.07-3.04) |  |
|  |  |  |  |  |  |                                            | 30.0-34.9 | 1.94 (1.46-2.59) |  |
|  |  |  |  |  |  |                                            | ≥35.0     | 2.81 (1.92-4.10) |  |
|  |  |  |  |  |  | BMI, never smokers, age 45-64 years, women | 15.0-18.4 | 1.79 (1.23-2.58) |  |
|  |  |  |  |  |  |                                            | 18.5-24.9 | 1.00             |  |
|  |  |  |  |  |  |                                            | 25.0-29.9 | 1.16 (1.01-1.34) |  |
|  |  |  |  |  |  |                                            | 30.0-34.9 | 1.68 (1.41-2.01) |  |
|  |  |  |  |  |  |                                            | ≥35.0     | 2.24 (1.82-2.75) |  |
|  |  |  |  |  |  | BMI, former smokers                        | 15.0-18.4 | 2.19 (1.25-3.85) |  |
|  |  |  |  |  |  |                                            | 18.5-24.9 | 1.40 (1.22-1.60) |  |
|  |  |  |  |  |  |                                            | 25.0-29.9 | 1.67 (1.41-1.99) |  |
|  |  |  |  |  |  |                                            | 30.0-34.9 | 1.98 (1.61-2.43) |  |





|  |  |  |  |  |  |                                                                                                |           |                  |  |
|--|--|--|--|--|--|------------------------------------------------------------------------------------------------|-----------|------------------|--|
|  |  |  |  |  |  |                                                                                                | 25.0-29.9 | 1.47 (1.31-1.64) |  |
|  |  |  |  |  |  |                                                                                                | 30.0-34.9 | 2.08 (1.83-2.37) |  |
|  |  |  |  |  |  |                                                                                                | ≥35.0     | 3.17 (2.63-3.82) |  |
|  |  |  |  |  |  | BMI, current smokers                                                                           | 15.0-18.4 | 5.40 (4.36-6.69) |  |
|  |  |  |  |  |  |                                                                                                | 18.5-24.9 | 3.28 (2.94-3.66) |  |
|  |  |  |  |  |  |                                                                                                | 25.0-29.9 | 2.97 (2.67-3.30) |  |
|  |  |  |  |  |  |                                                                                                | 30.0-34.9 | 3.71 (3.16-4.36) |  |
|  |  |  |  |  |  |                                                                                                | ≥35.0     | 4.50 (3.53-5.74) |  |
|  |  |  |  |  |  | BMI, never smokers, age 65-99 years, excluding first 5 years of follow-up                      | 15.0-18.4 | 1.19 (1.03-1.38) |  |
|  |  |  |  |  |  |                                                                                                | 18.5-24.9 | 1.00             |  |
|  |  |  |  |  |  |                                                                                                | 25.0-29.9 | 0.99 (0.93-1.04) |  |
|  |  |  |  |  |  |                                                                                                | 30.0-34.9 | 1.11 (1.02-1.21) |  |
|  |  |  |  |  |  |                                                                                                | ≥35.0     | 1.22 (1.06-1.41) |  |
|  |  |  |  |  |  | BMI, former smokers                                                                            | 15.0-18.4 | 1.51 (1.22-1.88) |  |
|  |  |  |  |  |  |                                                                                                | 18.5-24.9 | 1.23 (1.17-1.30) |  |
|  |  |  |  |  |  |                                                                                                | 25.0-29.9 | 1.20 (1.13-1.27) |  |
|  |  |  |  |  |  |                                                                                                | 30.0-34.9 | 1.45 (1.33-1.59) |  |
|  |  |  |  |  |  |                                                                                                | ≥35.0     | 1.71 (1.44-2.04) |  |
|  |  |  |  |  |  | BMI, current smokers                                                                           | 15.0-18.4 | 2.58 (2.12-3.14) |  |
|  |  |  |  |  |  |                                                                                                | 18.5-24.9 | 1.91 (1.77-2.06) |  |
|  |  |  |  |  |  |                                                                                                | 25.0-29.9 | 1.77 (1.61-1.94) |  |
|  |  |  |  |  |  |                                                                                                | 30.0-34.9 | 2.42 (1.99-2.94) |  |
|  |  |  |  |  |  |                                                                                                | ≥35.0     | 2.12 (1.52-2.97) |  |
|  |  |  |  |  |  | BMI, never smokers, age 18-44 years, all subjects (including poor and fair health at baseline) | 15.0-18.4 | 1.13 (0.74-1.73) |  |
|  |  |  |  |  |  |                                                                                                | 18.5-24.9 | 1.00             |  |
|  |  |  |  |  |  |                                                                                                | 25.0-29.9 | 1.23 (1.05-1.44) |  |
|  |  |  |  |  |  |                                                                                                | 30.0-34.9 | 1.60 (1.32-1.94) |  |
|  |  |  |  |  |  |                                                                                                | ≥35.0     | 2.78 (2.20-3.50) |  |
|  |  |  |  |  |  | BMI, former smokers                                                                            | 15.0-18.4 | 1.62 (0.88-3.01) |  |
|  |  |  |  |  |  |                                                                                                | 18.5-24.9 | 1.08 (0.89-1.30) |  |
|  |  |  |  |  |  |                                                                                                | 25.0-29.9 | 1.08 (0.90-1.29) |  |
|  |  |  |  |  |  |                                                                                                | 30.0-34.9 | 1.62 (1.22-2.15) |  |
|  |  |  |  |  |  |                                                                                                | ≥35.0     | 2.36 (1.62-3.42) |  |
|  |  |  |  |  |  | BMI, current smokers                                                                           | 15.0-18.4 | 3.68 (2.91-4.64) |  |
|  |  |  |  |  |  |                                                                                                | 18.5-24.9 | 2.81 (2.50-3.15) |  |
|  |  |  |  |  |  |                                                                                                | 25.0-29.9 | 2.48 (2.16-2.85) |  |
|  |  |  |  |  |  |                                                                                                | 30.0-34.9 | 3.32 (2.78-3.96) |  |
|  |  |  |  |  |  |                                                                                                | ≥35.0     | 4.87 (3.90-6.08) |  |
|  |  |  |  |  |  | BMI, never smokers, age 45-64 years, all subjects (including poor and fair health at baseline) | 15.0-18.4 | 1.75 (1.25-2.44) |  |
|  |  |  |  |  |  |                                                                                                | 18.5-24.9 | 1.00             |  |
|  |  |  |  |  |  |                                                                                                | 25.0-29.9 | 1.16 (1.06-1.28) |  |
|  |  |  |  |  |  |                                                                                                | 30.0-34.9 | 1.67 (1.48-1.89) |  |
|  |  |  |  |  |  |                                                                                                | ≥35.0     | 2.47 (2.12-2.88) |  |

|                                         |                                     |                                        |                                                 |          |                          |                                                |                                                                                                                                                                                                                                                                                                                                                                                                                                                                                                               |                                                                                                                                                                                                                                                                                                                                                                                                                                                                                                      |                                                                                                          |                                                                                                                                         |
|-----------------------------------------|-------------------------------------|----------------------------------------|-------------------------------------------------|----------|--------------------------|------------------------------------------------|---------------------------------------------------------------------------------------------------------------------------------------------------------------------------------------------------------------------------------------------------------------------------------------------------------------------------------------------------------------------------------------------------------------------------------------------------------------------------------------------------------------|------------------------------------------------------------------------------------------------------------------------------------------------------------------------------------------------------------------------------------------------------------------------------------------------------------------------------------------------------------------------------------------------------------------------------------------------------------------------------------------------------|----------------------------------------------------------------------------------------------------------|-----------------------------------------------------------------------------------------------------------------------------------------|
|                                         |                                     |                                        |                                                 |          |                          |                                                | BMI, former smokers<br>15.0-18.4<br>18.5-24.9<br>25.0-29.9<br>30.0-34.9<br>≥35.0<br>BMI, current smokers<br>15.0-18.4<br>18.5-24.9<br>25.0-29.9<br>30.0-34.9<br>≥35.0<br>BMI, never smokers, age 65-99 years, all subjects (including poor and fair health at baseline)<br>15.0-18.4<br>18.5-24.9<br>25.0-29.9<br>30.0-34.9<br>≥35.0<br>BMI, former smokers<br>15.0-18.4<br>18.5-24.9<br>25.0-29.9<br>30.0-34.9<br>≥35.0<br>BMI, current smokers<br>15.0-18.4<br>18.5-24.9<br>25.0-29.9<br>30.0-34.9<br>≥35.0 | 2.98 (2.09-4.25)<br>1.44 (1.30-1.60)<br>1.50 (1.36-1.66)<br>2.11 (1.91-2.34)<br>3.28 (2.87-3.76)<br>5.63 (4.75-6.67)<br>3.22 (2.94-3.53)<br>3.02 (2.75-3.30)<br>3.59 (3.15-4.10)<br>5.10 (4.29-6.08)<br>1.17 (1.04-1.32)<br>1.00<br>0.99 (0.94-1.04)<br>1.11 (1.04-1.19)<br>1.34 (1.20-1.51)<br>1.83 (1.54-2.18)<br>1.25 (1.19-1.31)<br>1.21 (1.15-1.27)<br>1.47 (1.36-1.59)<br>1.82 (1.60-2.08)<br>2.13 (1.75-2.58)<br>1.87 (1.75-1.99)<br>1.73 (1.60-1.86)<br>2.21 (1.92-2.55)<br>2.41 (1.91-3.04) |                                                                                                          |                                                                                                                                         |
| Hinnouho GM et al, 2013, United Kingdom | Whitehall Study 2                   | 1985-1988 – 2010, 17.7 years follow-up | 5269 men and women, age 39-62 years: 413 deaths | Measured | No                       | First 5 years excluded in sensitivity analysis | BMI                                                                                                                                                                                                                                                                                                                                                                                                                                                                                                           | 18.5-24.9<br>25-29.9<br>≥30                                                                                                                                                                                                                                                                                                                                                                                                                                                                          | 1.00<br>1.01 (0.82-1.26)<br>1.68 (1.27-2.22)                                                             | Age, sex, occupational position, physical activity, smoking status, alcohol, fruit and vegetable consumption, marital status, ethnicity |
| Takata Y et al, 2013, Japan             | Fukuoka Prefecture                  | 1998 – 2010, 12 years follow-up        | 675 men and women, age 80 years: 397 deaths     | Measured | No                       | No                                             | BMI                                                                                                                                                                                                                                                                                                                                                                                                                                                                                                           | <19.5<br>19.5-<21.1<br>21.1-<22.5<br>22.5-<23.8<br>23.8-<26.0<br>≥26.0                                                                                                                                                                                                                                                                                                                                                                                                                               | 1.00<br>0.78 (0.55-1.12)<br>0.75 (0.52-1.08)<br>0.47 (0.32-0.70)<br>0.55 (0.38-0.79)<br>0.61 (0.42-0.89) | Gender, smoking status, alcohol, current outpatient, SBP, serum glucose, total cholesterol                                              |
| Dahl AK et al, 2013, Sweden             | OCTO-Twin, Gender, and NONA studies | NA-NA, 18 years follow-up              | 882 men and women, age 70-95 years: 667 deaths  | Measured | No                       | No                                             | BMI                                                                                                                                                                                                                                                                                                                                                                                                                                                                                                           | <25.0<br>25.0-29.9<br>30.0                                                                                                                                                                                                                                                                                                                                                                                                                                                                           | 1.00<br>0.80 (0.67-0.95)<br>0.93 (0.71-1.22)                                                             | Age, sex, education, multimorbidity, BMI change, age X BMI change interaction                                                           |
| Stenholm S et al, 2014,                 | Mini-Finland Health                 | 1978-1980 – 2011,                      | 3594 men and women, age                         | Measured | Prevalent cardiovascular | First 5 years of                               | BMI, age 50-69 years                                                                                                                                                                                                                                                                                                                                                                                                                                                                                          | 18.5-24.9<br>25.0-29.9                                                                                                                                                                                                                                                                                                                                                                                                                                                                               | 1.00<br>0.99 (0.89-1.09)                                                                                 | Age, sex, education, smoking status, alcohol use, physical                                                                              |

|                                         |                                                                      |                                                    |                                                                                              |                          |                                                                           |                                                                   |                                                                                            |                                                                                                                                                                                                                |                                                                                                                                                                                                                                                                                                                      |                                                                                                                                                               |
|-----------------------------------------|----------------------------------------------------------------------|----------------------------------------------------|----------------------------------------------------------------------------------------------|--------------------------|---------------------------------------------------------------------------|-------------------------------------------------------------------|--------------------------------------------------------------------------------------------|----------------------------------------------------------------------------------------------------------------------------------------------------------------------------------------------------------------|----------------------------------------------------------------------------------------------------------------------------------------------------------------------------------------------------------------------------------------------------------------------------------------------------------------------|---------------------------------------------------------------------------------------------------------------------------------------------------------------|
| Finland                                 | Examination Survey                                                   | 17.9 years follow-up                               | 50-91 years: 3043 deaths                                                                     |                          | disease and cancer excluded in sensitivity analyses (not reported)        | follow-up excluded in sensitivity analyses (results not reported) | BMI, age $\geq 70$ years                                                                   | $\geq 30.0$<br>18.5-24.9<br>25.0-29.9<br>$\geq 30.0$                                                                                                                                                           | 1.24 (1.10-1.40)<br>1.00<br>0.84 (0.72-0.97)<br>0.81 (0.67-0.98)                                                                                                                                                                                                                                                     | activity, handgrip strength                                                                                                                                   |
| Singh PN et al, 2014, USA               | Adventist Health Study 2                                             | 2002/2007 – 2009, 5.7 years follow-up              | 22884 black men and women, age 58-108 years: 879 deaths<br><br>5131 and 13640 never smokers: | Self-reported, validated | No                                                                        | No                                                                | BMI, women<br><br>BMI, men<br><br>BMI, women, never smokers<br><br>BMI, men, never smokers | <23.7<br>23.7-<26.6<br>26.6-<29.6<br>29.6-33.8<br>>33.8<br><23.6<br>23.6-<25.8<br>25.8-<27.8<br>27.8-30.8<br>>30.8<br><18.5<br>18.5-24.9<br>25-29.9<br>$\geq 30$<br><18.5<br>18.5-24.9<br>25-29.9<br>$\geq 30$ | 1.40 (1.05-1.86)<br>1.08 (0.80-1.44)<br>1.00<br>1.23 (0.92-1.63)<br>1.42 (1.06-1.88)<br>1.44 (0.95-2.16)<br>1.19 (0.79-1.79)<br>1.00<br>1.35 (0.88-2.04)<br>1.66 (1.10-2.49)<br>1.24 (0.66-2.33)<br>1.00<br>0.95 (0.73-1.24)<br>1.43 (1.11-1.84)<br>4.42 (2.14-9.13)<br>1.00<br>0.85 (0.58-1.25)<br>1.59 (1.02-2.49) | Age, smoking status, vegetarian diet, vigorous physical activity                                                                                              |
| Ghaem Maralani H et al, 2014, Australia | Blue Mountains Eye Study                                             | 1992-1994 – 1997-1999 - 2007, 14.7 years follow-up | 2216 men and women, age $\geq 49$ years: 599 deaths                                          | Measured                 | No                                                                        | No                                                                | BMI, age $\leq 70$ years<br><br>BMI, age $>70$ years                                       | <18.5<br>18.5-<25<br>25-<30<br>$\geq 30$<br><18.5<br>18.5-<25<br>25-<30<br>$\geq 30$                                                                                                                           | 1.82 (0.80-4.15)<br>1.00<br>1.07 (0.82-1.41)<br>1.44 (1.05-1.98)<br>1.20 (0.53-2.72)<br>1.00<br>0.98 (0.77-1.25)<br>0.94 (0.67-1.32)                                                                                                                                                                                 | Age, sex, smoking status, pre-existing disease (hypertension, diabetes, angina, acute myocardial infarction, stroke, cancer)                                  |
| Xiao Q et al, 2014, USA                 | Prostate, Lung, Colorectal and Ovarian (PLCO) Cancer Screening Trial | 1993-2001 – 2009, 13 years follow-up the           | 7446 non-Hispanic black and 130598 white men and women, age 49-78 years: 1495/ 18236 deaths  | Self-reported            | Prevalent cancer, heart attack or stroke excluded in sensitivity analyses | No                                                                | BMI, non-hispanic black, all men<br><br>BMI, non-hispanic black, healthy men who never     | 15.0-<22.5<br>22.5-<25.0<br>25.0-<27.5<br>27.5-<30.0<br>30.0-<35.0<br>35.0-<40.0<br>40.0-<50.0<br>15.0-<22.5<br>22.5-<25.0                                                                                     | 1.32 (1.04-1.67)<br>1.00<br>0.95 (0.77-1.19)<br>0.88 (0.70-1.10)<br>1.15 (0.93-1.43)<br>1.25 (0.93-1.67)<br>1.87 (1.25-2.79)<br>1.33 (0.84-2.12)<br>1.00                                                                                                                                                             | Age, education, marital status, smoking status, pack-years, years since quitting smoking<br><br>Healthy men and women who never smoked or quit $\geq 5$ years |

|  |  |  |  |  |                                                                                         |                                                                                                |                                                                                                                              |                                                                                                  |                                                                                                              |
|--|--|--|--|--|-----------------------------------------------------------------------------------------|------------------------------------------------------------------------------------------------|------------------------------------------------------------------------------------------------------------------------------|--------------------------------------------------------------------------------------------------|--------------------------------------------------------------------------------------------------------------|
|  |  |  |  |  |                                                                                         | smoked or quit 5 years before baseline                                                         | 25.0-<27.5<br>27.5-<30.0<br>30.0-<35.0<br>35.0-<40.0<br>40.0-<50.0                                                           | 0.90 (0.62-1.31)<br>0.92 (0.63-1.35)<br>1.03 (0.71-1.49)<br>1.34 (0.84-2.16)<br>2.57 (1.48-4.54) | ago: age, education marital status, remote former smoking, previous-pack-years, years since quitting smoking |
|  |  |  |  |  | BMI, non-hispanic white, all men                                                        | 15.0-<22.5<br>22.5-<25.0<br>25.0-<27.5<br>27.5-<30.0<br>30.0-<35.0<br>35.0-<40.0<br>40.0-<50.0 | 1.29 (1.19-1.40)<br>1.00<br>0.95 (0.90-1.01)<br>0.99 (0.94-1.06)<br>1.17 (1.10-1.24)<br>1.60 (1.47-1.75)<br>2.06 (1.80-2.37) |                                                                                                  |                                                                                                              |
|  |  |  |  |  | BMI, non-hispanic white, healthy men who never smoked or quit 5 years before baseline   | 15.0-<22.5<br>22.5-<25.0<br>25.0-<27.5<br>27.5-<30.0<br>30.0-<35.0<br>35.0-<40.0<br>40.0-<50.0 | 1.26 (1.11-1.44)<br>1.00<br>0.99 (0.91-1.08)<br>1.10 (1.01-1.19)<br>1.23 (1.13-1.34)<br>1.73 (1.53-1.96)<br>2.33 (1.93-2.82) |                                                                                                  |                                                                                                              |
|  |  |  |  |  | BMI, non-hispanic black, all women                                                      | 15.0-<22.5<br>22.5-<25.0<br>25.0-<27.5<br>27.5-<30.0<br>30.0-<35.0<br>35.0-<40.0<br>40.0-<50.0 | 1.55 (1.07-2.24)<br>1.00<br>0.80 (0.58-1.10)<br>0.84 (0.61-1.14)<br>0.89 (0.67-1.19)<br>1.04 (0.75-1.44)<br>1.50 (1.06-2.14) |                                                                                                  |                                                                                                              |
|  |  |  |  |  | BMI, non-hispanic black, healthy women who never smoked or quit 5 years before baseline | 15.0-<22.5<br>22.5-<25.0<br>25.0-<27.5<br>27.5-<30.0<br>30.0-<35.0<br>35.0-<40.0<br>40.0-<50.0 | 1.51 (0.81-2.79)<br>1.00<br>0.89 (0.55-1.44)<br>0.94 (0.59-1.48)<br>0.90 (0.58-1.40)<br>1.00 (0.61-1.63)<br>1.67 (1.00-2.14) |                                                                                                  |                                                                                                              |
|  |  |  |  |  | BMI, non-hispanic white, all women                                                      | 15.0-<22.5<br>22.5-<25.0<br>25.0-<27.5<br>27.5-<30.0<br>30.0-<35.0<br>35.0-<40.0<br>40.0-<50.0 | 1.29 (1.19-1.40)<br>1.00<br>0.97 (0.90-1.05)<br>1.07 (0.98-1.16)<br>1.22 (1.13-1.33)<br>1.41 (1.27-1.57)<br>2.20 (1.95-2.49) |                                                                                                  |                                                                                                              |
|  |  |  |  |  | BMI, non-hispanic white, healthy women who never smoked or quit 5 years before          | 15.0-<22.5<br>22.5-<25.0<br>25.0-<27.5                                                         | 1.27 (1.14-1.43)<br>1.00<br>1.05 (0.94-1.16)                                                                                 |                                                                                                  |                                                                                                              |

|                                |                                                    |                                        |                                                                                                                |                            |             |                            |                                                                                                |                                                                                                                                                                                                                  |                                                                                                                                                                                                                                                                                                                                                              |                                                                                                                           |
|--------------------------------|----------------------------------------------------|----------------------------------------|----------------------------------------------------------------------------------------------------------------|----------------------------|-------------|----------------------------|------------------------------------------------------------------------------------------------|------------------------------------------------------------------------------------------------------------------------------------------------------------------------------------------------------------------|--------------------------------------------------------------------------------------------------------------------------------------------------------------------------------------------------------------------------------------------------------------------------------------------------------------------------------------------------------------|---------------------------------------------------------------------------------------------------------------------------|
|                                |                                                    |                                        |                                                                                                                |                            |             |                            | baseline                                                                                       | 27.5-<30.0<br>30.0-<35.0<br>35.0-<40.0<br>40.0-<50.0                                                                                                                                                             | 1.11 (0.99-1.24)<br>1.34 (1.21-1.49)<br>1.56 (1.36-1.79)<br>2.46 (2.10-2.88)                                                                                                                                                                                                                                                                                 |                                                                                                                           |
| McTigue KM et al, 2014, USA    | Women's Health Initiative                          | 1993-1998 - 2005, 7.82 years follow-up | 156775 women, age 50-79 years: NA                                                                              | Measured                   | No          | No                         | BMI, all<br><br>BMI, white women<br><br>BMI, African American women<br><br>BMI, hispanic women | 18.5-24.9<br>25-29.9<br>30-34.9<br>35-39.9<br>≥40<br>18.5-24.9<br>25-29.9<br>30-34.9<br>35-39.9<br>≥40<br>18.5-24.9<br>25-29.9<br>30-34.9<br>35-39.9<br>≥40<br>18.5-24.9<br>25-29.9<br>30-34.9<br>35-39.9<br>≥40 | 1.00<br>0.97 (0.92-1.02)<br>1.16 (1.09-1.23)<br>1.53 (1.41-1.65)<br>1.88 (1.71-2.07)<br>1.00<br>0.97 (0.92-1.03)<br>1.15 (1.07-1.22)<br>1.51 (1.39-1.65)<br>1.97 (1.77-2.20)<br>1.00<br>1.07 (0.88-1.31)<br>1.28 (1.04-1.57)<br>1.58 (1.26-1.98)<br>1.55 (1.20-2.00)<br>1.00<br>0.88 (0.61-1.26)<br>1.37 (0.95-1.99)<br>2.15 (1.39-3.31)<br>2.59 (1.55-4.31) | Age, smoking status, education, participant's cohort of the WHI                                                           |
| Buys DR et al, 2014, USA       | University of Alabama at Birmingham Study of Aging | 1999-2001 - NA, 8.5 years follow-up    | 1000 men and women, age ≥65 years: 382 deaths                                                                  | Measured and self-reported | No          | No                         | BMI                                                                                            | ≤18.5<br>>18.5-25<br>>25-30<br>>30-35<br>≥35                                                                                                                                                                     | 1.57 (0.88-2.82)<br>1.00<br>0.94 (0.73-1.21)<br>0.80 (0.58-1.09)<br>0.73 (0.49-1.09)                                                                                                                                                                                                                                                                         | Age, life-space, marital status, social support, comorbidity score, rural versus urban residence, race, gender, education |
| Ford DW et al, 2014, USA       | Geisinger Rural Health Study                       | 2009-2013, 3.1 years follow-up         | 2995 men and women, age ≥74 years: 360 deaths                                                                  | Self-reported              | No          | No                         | BMI                                                                                            | <18.5<br>18.5-24.9<br>25-29.9<br>30-34.9<br>≥35                                                                                                                                                                  | 1.85 (1.09-3.14)<br>1.00<br>0.71 (0.55-0.91)<br>0.82 (0.60-1.11)<br>0.89 (0.62-1.51)                                                                                                                                                                                                                                                                         | Age, sex, smoking status, weight gain, weight loss                                                                        |
| Joshy G et al, 2014, Australia | The 45 and Up Study                                | 2006-2008 - 2012, 3.9 years follow-up  | 246314 men and women, age ≥45 years: 11127 deaths<br>41754 healthy men and 66489 healthy women, never smokers: | Self-reported, validated   | CVD, cancer | First 2 years of follow-up | BMI, men, never smokers<br><br>BMI, women, never smokers                                       | 15-18.49<br>18.5-19.99<br>20-22.49<br>22.50-24.99<br>25.00-27.49<br>27.50-29.99<br>30-34.99<br>35-50<br>15-18.49                                                                                                 | 1.85 (1.04-3.27)<br>1.84 (1.20-2.81)<br>1.49 (1.18-1.88)<br>1.00<br>0.99 (0.80-1.23)<br>1.08 (0.84-1.38)<br>1.45 (1.12-1.88)<br>2.61 (1.81-3.78)<br>1.93 (1.35-2.76)                                                                                                                                                                                         | Age, region of residence, household income, education, alcohol intake, health insurance                                   |

|                           |                           |                                 |                                                                                                                                              |               |                                                                                                                      |    |                                                                                                                                                                                                                   |                                                                                                                                                                                                                                                                                                                                                                                                                                                                  |                                                                                                                                                                                                                                                                                                                                                                                                                                                                                                                                                                                                                                                                                              |                                                                                                                                                                                                                                                                                                                                        |
|---------------------------|---------------------------|---------------------------------|----------------------------------------------------------------------------------------------------------------------------------------------|---------------|----------------------------------------------------------------------------------------------------------------------|----|-------------------------------------------------------------------------------------------------------------------------------------------------------------------------------------------------------------------|------------------------------------------------------------------------------------------------------------------------------------------------------------------------------------------------------------------------------------------------------------------------------------------------------------------------------------------------------------------------------------------------------------------------------------------------------------------|----------------------------------------------------------------------------------------------------------------------------------------------------------------------------------------------------------------------------------------------------------------------------------------------------------------------------------------------------------------------------------------------------------------------------------------------------------------------------------------------------------------------------------------------------------------------------------------------------------------------------------------------------------------------------------------------|----------------------------------------------------------------------------------------------------------------------------------------------------------------------------------------------------------------------------------------------------------------------------------------------------------------------------------------|
|                           |                           |                                 | 1463 deaths                                                                                                                                  |               |                                                                                                                      |    |                                                                                                                                                                                                                   | 18.5-19.99<br>20-22.49<br>22.50-24.99<br>25.00-27.49<br>27.50-29.99<br>30-34.99<br>35-50                                                                                                                                                                                                                                                                                                                                                                         | 1.74 (1.29-2.35)<br>1.45 (1.16-1.82)<br>1.00<br>1.01 (0.80-1.28)<br>1.06 (0.81-1.38)<br>1.21 (0.93-1.57)<br>1.66 (1.18-2.33)                                                                                                                                                                                                                                                                                                                                                                                                                                                                                                                                                                 |                                                                                                                                                                                                                                                                                                                                        |
| Patel AV et al, 2014, USA | Cancer Prevention Study 2 | 1982 – 2010, 28 years follow-up | 955431 white and black men and women, age ≥30 years: 453102 deaths<br><br>453833 white and black men and women, never smokers: 202267 deaths | Self-reported | Analyses were stratified by prevalent disease (cancer, heart disease, stroke, emphysema, chronic bronchitis, asthma) | No | BMI, white smokers with prevalent disease, men<br><br>BMI, white smokers without prevalent disease<br><br>BMI, white never smoker with prevalent disease<br><br>BMI, white never smoker without prevalent disease | 15.0-18.4<br>18.5-19.9<br>20.0-22.4<br>22.5-24.9<br>25.0-27.4<br>27.5-29.9<br>30.0-34.9<br>35.0-39.9<br>≥40.0<br>15.0-18.4<br>18.5-19.9<br>20.0-22.4<br>22.5-24.9<br>25.0-27.4<br>27.5-29.9<br>30.0-34.9<br>35.0-39.9<br>≥40.0<br>15.0-18.4<br>18.5-19.9<br>20.0-22.4<br>22.5-24.9<br>25.0-27.4<br>27.5-29.9<br>30.0-34.9<br>35.0-39.9<br>≥40.0<br>15.0-18.4<br>18.5-19.9<br>20.0-22.4<br>22.5-24.9<br>25.0-27.4<br>27.5-29.9<br>30.0-34.9<br>35.0-39.9<br>≥40.0 | 1.66 (1.55-1.76)<br>1.47 (1.39-1.55)<br>1.18 (1.15-1.22)<br>1.00<br>0.96 (0.94-0.98)<br>1.02 (1.00-1.05)<br>1.15 (1.12-1.19)<br>1.28 (1.19-1.37)<br>1.52 (1.22-1.89)<br>1.29 (1.18-1.42)<br>1.34 (1.27-1.42)<br>1.15 (1.12-1.18)<br>1.00<br>0.99 (0.97-1.01)<br>1.06 (1.04-1.08)<br>1.24 (1.21-1.28)<br>1.50 (1.40-1.60)<br>2.00 (1.63-2.45)<br>1.34 (1.16-1.54)<br>1.38 (1.25-1.53)<br>1.11 (1.05-1.16)<br>1.00<br>1.06 (1.02-1.10)<br>1.14 (1.09-1.19)<br>1.42 (1.35-1.50)<br>1.75 (1.55-1.97)<br>1.18 (0.75-1.86)<br>1.25 (1.08-1.45)<br>1.06 (0.96-1.17)<br>1.01 (0.97-1.05)<br>1.00<br>1.07 (1.04-1.10)<br>1.28 (1.24-1.32)<br>1.50 (1.44-1.56)<br>2.17 (1.98-2.39)<br>2.52 (1.92-3.30) | Age, race, education, physical activity, alcohol, marital status, aspirin use, fat consumption, vegetable consumption, and among ever smokers: smoking status, cigarettes per day, years since quitting<br>+ analyses with prevalent disease further adjusted for cancer, heart disease, stroke, emphysema, chronic bronchitis, asthma |

|  |  |  |  |  |  |  |                                                   |                                                                                                               |                                                                                                                                                                      |  |
|--|--|--|--|--|--|--|---------------------------------------------------|---------------------------------------------------------------------------------------------------------------|----------------------------------------------------------------------------------------------------------------------------------------------------------------------|--|
|  |  |  |  |  |  |  | BMI, black smokers with prevalent disease, men    | 15.0-18.4<br>18.5-19.9<br>20.0-22.4<br>22.5-24.9<br>25.0-27.4<br>27.5-29.9<br>30.0-34.9<br>≥35.0              | 1.35 (0.95-1.93)<br>1.36 (1.04-1.77)<br>1.10 (0.94-1.29)<br>1.00<br>0.97 (0.86-1.11)<br>0.95 (0.83-1.10)<br>1.06 (0.90-1.23)<br>1.14 (0.86-1.52)                     |  |
|  |  |  |  |  |  |  | BMI, black smokers without prevalent disease      | 15.0-18.4<br>18.5-19.9<br>20.0-22.4<br>22.5-24.9<br>25.0-27.4<br>27.5-29.9<br>30.0-34.9<br>≥35.0              | 0.99 (0.66-1.50)<br>1.57 (1.24-2.00)<br>1.14 (1.00-1.29)<br>1.00<br>1.03 (0.94-1.14)<br>1.00 (0.89-1.12)<br>1.11 (0.97-1.28)<br>1.15 (0.88-1.51)                     |  |
|  |  |  |  |  |  |  | BMI, black never smoker with prevalent disease    | 15.0-18.4<br>18.5-19.9<br>20.0-22.4<br>22.5-24.9<br>25.0-27.4<br>27.5-29.9<br>30.0-34.9<br>≥35.0              | 1.76 (0.98-3.17)<br>2.00 (1.17-3.45)<br>1.36 (0.99-1.86)<br>1.00<br>0.76 (0.60-0.95)<br>0.88 (0.70-1.12)<br>1.00 (0.79-1.27)<br>0.91 (0.57-1.46)                     |  |
|  |  |  |  |  |  |  | BMI, black never smoker without prevalent disease | 15.0-18.4<br>18.5-19.9<br>20.0-22.4<br>22.5-24.9<br>25.0-27.4<br>27.5-29.9<br>30.0-34.9<br>≥35.0              | 0.78 (0.29-2.13)<br>1.60 (0.94-2.72)<br>1.05 (0.83-1.34)<br>1.00<br>1.18 (1.01-1.38)<br>1.24 (1.05-1.47)<br>1.53 (1.28-1.83)<br>1.97 (1.41-2.76)                     |  |
|  |  |  |  |  |  |  | BMI, white smokers with prevalent disease, women  | 15.0-18.4<br>18.5-19.9<br>20.0-22.4<br>22.5-24.9<br>25.0-27.4<br>27.5-29.9<br>30.0-34.9<br>35.0-39.9<br>≥40.0 | 1.69 (1.61-1.77)<br>1.21 (1.16-1.26)<br>1.05 (1.03-1.08)<br>1.00<br>1.04 (1.01-1.08)<br>1.12 (1.08-1.17)<br>1.20 (1.16-1.25)<br>1.32 (1.24-1.40)<br>1.58 (1.43-1.74) |  |
|  |  |  |  |  |  |  | BMI, white smokers without prevalent disease      | 15.0-18.4<br>18.5-19.9                                                                                        | 1.56 (1.49-1.63)<br>1.14 (1.10-1.18)                                                                                                                                 |  |



|  |  |  |  |  |  |                                                      |           |                  |  |
|--|--|--|--|--|--|------------------------------------------------------|-----------|------------------|--|
|  |  |  |  |  |  |                                                      | 20.0-22.4 | 1.02 (1.00-1.05) |  |
|  |  |  |  |  |  |                                                      | 22.5-24.9 | 1.00             |  |
|  |  |  |  |  |  |                                                      | 25.0-27.4 | 1.06 (1.03-1.08) |  |
|  |  |  |  |  |  |                                                      | 27.5-29.9 | 1.13 (1.09-1.17) |  |
|  |  |  |  |  |  |                                                      | 30.0-34.9 | 1.26 (1.21-1.31) |  |
|  |  |  |  |  |  |                                                      | 35.0-39.9 | 1.53 (1.43-1.64) |  |
|  |  |  |  |  |  |                                                      | ≥40.0     | 1.92 (1.70-2.16) |  |
|  |  |  |  |  |  | BMI, white never smoker<br>with prevalent disease    | 15.0-18.4 | 1.44 (1.37-1.52) |  |
|  |  |  |  |  |  |                                                      | 18.5-19.9 | 1.10 (1.06-1.14) |  |
|  |  |  |  |  |  |                                                      | 20.0-22.4 | 1.01 (0.98-1.03) |  |
|  |  |  |  |  |  |                                                      | 22.5-24.9 | 1.00             |  |
|  |  |  |  |  |  |                                                      | 25.0-27.4 | 1.05 (1.02-1.07) |  |
|  |  |  |  |  |  |                                                      | 27.5-29.9 | 1.13 (1.10-1.17) |  |
|  |  |  |  |  |  |                                                      | 30.0-34.9 | 1.25 (1.21-1.28) |  |
|  |  |  |  |  |  |                                                      | 35.0-39.9 | 1.51 (1.44-1.59) |  |
|  |  |  |  |  |  |                                                      | ≥40.0     | 1.82 (1.67-1.98) |  |
|  |  |  |  |  |  | BMI, white never smoker<br>without prevalent disease | 15.0-18.4 | 1.20 (1.14-1.26) |  |
|  |  |  |  |  |  |                                                      | 18.5-19.9 | 1.04 (1.01-1.07) |  |
|  |  |  |  |  |  |                                                      | 20.0-22.4 | 0.97 (0.95-0.99) |  |
|  |  |  |  |  |  |                                                      | 22.5-24.9 | 1.00             |  |
|  |  |  |  |  |  |                                                      | 25.0-27.4 | 1.09 (1.07-1.11) |  |
|  |  |  |  |  |  |                                                      | 27.5-29.9 | 1.21 (1.18-1.24) |  |
|  |  |  |  |  |  |                                                      | 30.0-34.9 | 1.39 (1.35-1.43) |  |
|  |  |  |  |  |  |                                                      | 35.0-39.9 | 1.79 (1.70-1.88) |  |
|  |  |  |  |  |  |                                                      | ≥40.0     | 2.45 (2.25-2.67) |  |
|  |  |  |  |  |  | BMI, black smokers with<br>prevalent disease, women  | 15.0-18.4 | 1.40 (1.06-1.84) |  |
|  |  |  |  |  |  |                                                      | 18.5-19.9 | 1.52 (1.17-1.98) |  |
|  |  |  |  |  |  |                                                      | 20.0-22.4 | 1.17 (1.00-1.38) |  |
|  |  |  |  |  |  |                                                      | 22.5-24.9 | 1.00             |  |
|  |  |  |  |  |  |                                                      | 25.0-27.4 | 0.99 (0.86-1.13) |  |
|  |  |  |  |  |  |                                                      | 27.5-29.9 | 1.10 (0.94-1.29) |  |
|  |  |  |  |  |  |                                                      | 30.0-34.9 | 1.12 (0.97-1.30) |  |
|  |  |  |  |  |  |                                                      | 35.0-39.9 | 1.14 (0.93-1.40) |  |
|  |  |  |  |  |  |                                                      | ≥40.0     | 1.43 (1.10-1.86) |  |
|  |  |  |  |  |  | BMI, black smokers without<br>prevalent disease      | 15.0-18.4 | 2.11 (1.59-2.80) |  |
|  |  |  |  |  |  |                                                      | 18.5-19.9 | 1.42 (1.15-1.76) |  |
|  |  |  |  |  |  |                                                      | 20.0-22.4 | 1.12 (0.98-1.28) |  |
|  |  |  |  |  |  |                                                      | 22.5-24.9 | 1.00             |  |
|  |  |  |  |  |  |                                                      | 25.0-27.4 | 1.13 (1.00-1.28) |  |
|  |  |  |  |  |  |                                                      | 27.5-29.9 | 1.18 (1.02-1.36) |  |
|  |  |  |  |  |  |                                                      | 30.0-34.9 | 1.36 (1.19-1.55) |  |
|  |  |  |  |  |  |                                                      | 35.0-39.9 | 1.52 (1.23-1.88) |  |
|  |  |  |  |  |  |                                                      | ≥40.0     | 1.42 (0.98-2.07) |  |

|                                |                                                                                                   |                                        |                                                   |                            |    |                                                                    |                                                                                                         |                                                                                                                                                                                                                                |                                                                                                                                                                                                                                                                                                                                              |                                                                                            |
|--------------------------------|---------------------------------------------------------------------------------------------------|----------------------------------------|---------------------------------------------------|----------------------------|----|--------------------------------------------------------------------|---------------------------------------------------------------------------------------------------------|--------------------------------------------------------------------------------------------------------------------------------------------------------------------------------------------------------------------------------|----------------------------------------------------------------------------------------------------------------------------------------------------------------------------------------------------------------------------------------------------------------------------------------------------------------------------------------------|--------------------------------------------------------------------------------------------|
|                                |                                                                                                   |                                        |                                                   |                            |    |                                                                    | BMI, black never smoker with prevalent disease<br><br>BMI, black never smoker without prevalent disease | 15.0-18.4<br>18.5-19.9<br>20.0-22.4<br>22.5-24.9<br>25.0-27.4<br>27.5-29.9<br>30.0-34.9<br>35.0-39.9<br>≥40.0<br>15.0-18.4<br>18.5-19.9<br>20.0-22.4<br>22.5-24.9<br>25.0-27.4<br>27.5-29.9<br>30.0-34.9<br>35.0-39.9<br>≥40.0 | 1.11 (0.79-1.55)<br>1.06 (0.81-1.38)<br>1.14 (0.98-1.34)<br>1.00<br>1.15 (1.01-1.30)<br>1.14 (0.99-1.30)<br>1.19 (1.05-1.34)<br>1.45 (1.23-1.70)<br>2.06 (1.67-2.56)<br>1.38 (1.03-1.85)<br>1.04 (0.82-1.30)<br>0.97 (0.85-1.10)<br>1.00<br>1.08 (0.97-1.19)<br>1.27 (1.14-1.42)<br>1.32 (1.19-1.46)<br>1.64 (1.40-1.91)<br>1.78 (1.43-2.21) |                                                                                            |
| Gao S et al, 2014, China       | Rural Elderly Chinese (Sichuan and Shandong)                                                      | 2003-2005 – NA, 7 years follow-up      | 2000 men and women, age ≥65 years: 473 deaths     | Measured                   | No | Excluded 1 <sup>st</sup> year of follow-up in sensitivity analysis | BMI                                                                                                     | <18.5<br>18.5-24.9<br>25.0-29.9<br>≥30.0                                                                                                                                                                                       | 1.64 (1.30-2.06)<br>1.00<br>1.09 (0.82-1.46)<br>0.39 (0.15-1.06)                                                                                                                                                                                                                                                                             | Age, sex, diabetes, stroke, cognitive decline score                                        |
| Liu Y et al, 2014, China       | Kailuan Study                                                                                     | 2006-2007 – 2010, 4.02 years follow-up | 95429 men and women, age 18-98 years: 1843 deaths | Measured                   | No | No                                                                 | BMI                                                                                                     | <25<br>25-<30<br>≥30                                                                                                                                                                                                           | 1.00 (0.84-1.19)<br>0.86 (0.72-1.02)<br>1.00                                                                                                                                                                                                                                                                                                 | Age, sex, average income, education, alcohol, history of MI, stroke, cancer                |
| Roh L et al, 2014, Switzerland | Swiss MONICA study, National Research Program 1A, the SOMIPOPS study, and the Swiss Health Survey | 1977-1993 – 2008, 19.2 years follow-up | 31578 men and women, age 25-74 years: 5694 deaths | Measured and self-reported | No | Exclusion of first 1-5 years in sensitivity analyses               | BMI, all<br><br>BMI, measured BMI<br><br>BMI, self-reported BMI                                         | <18.5<br>18.5-<25<br>25-<30<br>≥30.0<br><18.5<br>18.5-<25<br>25-<30<br>≥30.0<br><18.5<br>18.5-<25<br>25-<30<br>≥30.0                                                                                                           | 1.37 (1.14-1.65)<br>1.00<br>1.02 (0.97-1.09)<br>1.32 (1.22-1.43)<br>1.16 (0.88-1.53)<br>1.00<br>1.01 (0.94-1.09)<br>1.31 (1.18-1.44)<br>1.56 (1.24-2.05)<br>1.00<br>1.04 (0.95-1.15)<br>1.32 (1.14-1.53)                                                                                                                                     | Age, age squared, study waves, smoking status, sports frequency, healthy eating, education |
| Clark DO et al, 2014, USA      | Indianapolis-Ibadan                                                                               | 1992-2001 – 2011, 10                   | 1197 Yoruba Nigerian and                          | Measured                   | No | First year of follow-                                              | BMI, Yoruba Nigerians                                                                                   | <18.5<br>18.5-24.9                                                                                                                                                                                                             | 1.35 (1.12-1.63)<br>1.00                                                                                                                                                                                                                                                                                                                     | Age, sex, alcohol, smoking                                                                 |

|                               |                                              |                                         |                                                                    |          |                                                                                                                   |                                                       |                                                      |                                                                                                                        |                                                                                                                                                                              |                                                                                                                                                                                                                                                                                                                                                     |
|-------------------------------|----------------------------------------------|-----------------------------------------|--------------------------------------------------------------------|----------|-------------------------------------------------------------------------------------------------------------------|-------------------------------------------------------|------------------------------------------------------|------------------------------------------------------------------------------------------------------------------------|------------------------------------------------------------------------------------------------------------------------------------------------------------------------------|-----------------------------------------------------------------------------------------------------------------------------------------------------------------------------------------------------------------------------------------------------------------------------------------------------------------------------------------------------|
|                               | Dementia Project                             | years follow-up                         | 1269 African American men and women, age ≥70 years: 563/553 deaths |          |                                                                                                                   | up excluded in sensitivity analyses (partly reported) | BMI, African Americans                               | 25.0-29.9<br>≥30.0<br><18.5<br>18.5-24.9<br>25.0-29.9<br>≥30.0                                                         | 0.88 (0.67-1.16)<br>0.92 (0.61-1.39)<br>2.49 (1.40-4.43)<br>1.00<br>0.90 (0.72-1.14)<br>1.06 (0.85-1.33)                                                                     |                                                                                                                                                                                                                                                                                                                                                     |
| Wu CY et al, 2014, China      | Taipei Geriatric Health Examination Database | 2006-2010, 3.3 years follow-up          | 77541 men and women, age ≥65 years: 3842 deaths                    | Measured | No                                                                                                                | No                                                    | BMI                                                  | <18.5<br>18.5-24.9<br>25.0-29.9<br>30.0-34.9<br>≥35.0                                                                  | 1.92 (1.71-2.15)<br>1.00<br>0.82 (0.76-0.88)<br>0.82 (0.69-0.98)<br>1.59 (1.06-2.38)                                                                                         | Age, sex, marital status, education, smoking status, alcohol, exercise                                                                                                                                                                                                                                                                              |
| Mehta NK et al, 2014, Finland | Health 2000 Survey                           | 2000-2001 – 2011, ~10.5 years follow-up | 2505 men and women, age 50-74 years: 335 deaths                    | Measured | No                                                                                                                | No                                                    | BMI                                                  | <25.0<br>25.0-29.9<br>≥30.0                                                                                            | 1.00<br>1.08 (0.82-1.43)<br>1.22 (0.91-1.65)                                                                                                                                 | Age, sex, education, cigarette smoking status                                                                                                                                                                                                                                                                                                       |
| Lee Y et al, 2014, Korea      | Living Profiles of Older People Survey       | 2008 – 2011, 3 years follow-up          | 11844 men and women, age ≥60 years: 832 deaths                     | Measured | No                                                                                                                | No                                                    | BMI                                                  | <18.5<br>18.5-24.9<br>25.0-29.9<br>≥30.0                                                                               | 2.04 (1.55-2.70)<br>1.00<br>0.74 (0.57-0.96)<br>1.01 (0.57-1.79)                                                                                                             | Age, sex, marital status, education, household income, comorbidity, cognitive impairment, smoking status, alcohol, nutritional risk                                                                                                                                                                                                                 |
| He Y et al, 2014, China       | Machinery Factory Employees in Xi'an         | 1976-1994 – 2011, 30.4 years follow-up  | 1696 men and women, age 36-65 years: 655 deaths                    | Measured | Prevalent cancers and CVD cases excluded                                                                          | No                                                    | BMI, 1976<br><br>BMI, 1994                           | <18.5<br>18.5-22.9<br>23.0-24.9<br>≥25.0<br><18.5<br>18.5-22.9<br>23.0-24.9<br>≥25.0                                   | 0.93 (0.67-1.30)<br>1.00<br>0.69 (0.57-0.84)<br>0.75 (0.60-1.00)<br>1.43 (1.00-2.04)<br>1.00<br>1.14 (0.90-1.43)<br>1.27 (1.02-1.59)                                         | Age, sex, marital status, occupation, education, alcohol drinking, smoking status                                                                                                                                                                                                                                                                   |
| Kokkinos P et al, 2014, USA   | Veterans Affairs Medical Centers             | 1986-2011 - 2012, 10.8 years follow-up  | 18033 men, mean age 58.4 years: 5070 deaths                        | Measured | Implanted pacemakers, left bundle branch block, unable to complete exercise test, COPD, exercise capacity <2 METs | No                                                    | BMI<br><br>BMI, excluding first 2 years of follow-up | 18.5-20.0<br>20.1-23.9<br>24.0-27.9<br>28.0-31.9<br>≥32.0<br>18.5-20.0<br>20.1-23.9<br>24.0-27.9<br>28.0-31.9<br>≥32.0 | 1.56 (1.37-1.77)<br>1.21 (1.12-1.30)<br>1.00<br>0.95 (0.88-1.02)<br>0.97 (0.89-1.06)<br>1.55 (1.35-1.79)<br>1.21 (1.12-1.32)<br>1.00<br>0.96 (0.89-1.04)<br>0.99 (0.90-1.09) | Age, METs achieved, blood pressure, race, cardiovascular disease including heart failure, hypertension, type 2 diabetes, dyslipidemia, smoking status, muscle-wasting diseases, alcohol, drug abuse, beta-blockers, calcium-channel blockers, diuretics, angiotensin-converting enzyme inhibitors, angiotensin 2 receptor blockers, aspirin, lipid- |

|                                        |                                                |                                       |                                                       |               |                                                                         |    |                                                |                                                                                                                                                          |                                                                                                                                                                                                                          |                                                                                                                                                                                                                                                                                                                       |
|----------------------------------------|------------------------------------------------|---------------------------------------|-------------------------------------------------------|---------------|-------------------------------------------------------------------------|----|------------------------------------------------|----------------------------------------------------------------------------------------------------------------------------------------------------------|--------------------------------------------------------------------------------------------------------------------------------------------------------------------------------------------------------------------------|-----------------------------------------------------------------------------------------------------------------------------------------------------------------------------------------------------------------------------------------------------------------------------------------------------------------------|
|                                        |                                                |                                       |                                                       |               |                                                                         |    |                                                |                                                                                                                                                          |                                                                                                                                                                                                                          | lowering agents, hypoglycemic agents, year of entry into the study                                                                                                                                                                                                                                                    |
| Hirani V et al, 2014, Australia        | Concord Health and Ageing in Men Project       | 2005-2007 - 2013, 6.7 years follow-up | 1705 men, age 70-97 years: 461 deaths                 | Measured      | No                                                                      | No | BMI                                            | <20<br>20.0-24.9<br>25.0-29.9<br>≥30                                                                                                                     | 2.10 (1.17-3.79)<br>1.00<br>0.69 (0.54-0.89)<br>0.61 (0.45-0.82)                                                                                                                                                         | Age, smoking status, alcohol consumption, myocardial infarction, congestive heart failure, cancer, depressive symptoms, IADL disability, ADL disability, chair stands, white blood cell count, haemoglobin albumin                                                                                                    |
| Yiengprugsawan V et al, 2014, Thailand | Thai Cohort Study                              | 2005-2010, 5 years follow-up          | 87151 men and women, age 15-87 years: 583 deaths      | Self-reported | Metabolic, cardiovascular disorders including diabetes and hypertension | No | BMI, age <35 years<br><br>BMI, age 35-65 years | <18.5<br>18.5-<20.75<br>20.75-<23.0<br>23.0-<25.0<br>25.0-<30.0<br>≥30.0<br><br><18.5<br>18.5-<20.75<br>20.75-<23.0<br>23.0-<25.0<br>25.0-<30.0<br>≥30.0 | 1.15 (0.79-1.68)<br>1.00<br>0.98 (0.70-1.36)<br>1.08 (0.72-1.62)<br>1.11 (0.71-1.73)<br>0.63 (0.20-1.20)<br><br>1.82 (0.81-4.08)<br>1.00<br>1.61 (0.93-2.81)<br>0.79 (0.41-1.51)<br>1.28 (0.69-2.35)<br>2.37 (1.01-5.70) | Age, sex, monthly income, paid work hours, rural-urban residence, self-assessed health at baseline, smoking status, alcohol drinking status, physical activity                                                                                                                                                        |
| Hong ES et al, 2015, Korea             | Korean Longitudinal Study on Health and Aging  | 2005-2006 – 2011, 6 years follow-up   | 1000 men and women, age ≥65 years: 222 deaths         | Measured      | No                                                                      | No | BMI                                            | 13.9-21.8<br>21.8-23.9<br>23.9-26.0<br>26.0-35.8                                                                                                         | 1.00<br>0.76 (0.53-1.10)<br>0.63 (0.41-0.96)<br>0.54 (0.34-0.86)                                                                                                                                                         | Age, sex, alcohol, smoking status, exercise                                                                                                                                                                                                                                                                           |
| Long G et al, 2015, United Kingdom     | Allied Dunbar National Fitness Survey          | 1990 - 2014, 22.9 years follow-up     | 1796 men and 2122 women, age 16-96 years: 1175 deaths | Measured      | No                                                                      | No | BMI                                            | 14.9-24.9<br>25.0-29.9<br>30.0-49.9                                                                                                                      | 1.00<br>1.10 (0.93-1.31)<br>1.36 (1.08-1.72)                                                                                                                                                                             | Age, sex                                                                                                                                                                                                                                                                                                              |
| Suemoto CK et al, 2015, Brazil         | The Health, Well-Being and Ageing (SABE) study | 2000-2006 – 2010, 6.5 years follow-up | 1527 men and women, age ≥75 years: 621 deaths         | Measured      | Prevalent cancers excluded                                              | No | BMI                                            | 18.5-<20.0<br>20.0-<25.0<br>25.0-<30.0<br>≥30.0                                                                                                          | 1.51 (1.08-2.10)<br>1.00<br>0.84 (0.70-1.02)<br>0.82 (0.64-1.06)                                                                                                                                                         | Age, sex, marital status, years of education, childhood SES, occupation, income, diabetes, heart disease, lung disease, stroke, arthritis, depressive symptoms, alcohol, smoking status, physical activity, cognitive function, activities of daily living, frailty, nutritional status, year of entry into the study |



|  |  |  |  |  |  |                           |           |                  |  |
|--|--|--|--|--|--|---------------------------|-----------|------------------|--|
|  |  |  |  |  |  |                           | 20.0-20.9 | 1.45 (1.38-1.52) |  |
|  |  |  |  |  |  |                           | 21.0-21.9 | 1.28 (1.22-1.34) |  |
|  |  |  |  |  |  |                           | 22.0-22.9 | 1.14 (1.08-1.19) |  |
|  |  |  |  |  |  |                           | 23.0-23.9 | 1.03 (0.99-1.08) |  |
|  |  |  |  |  |  |                           | 24.0-24.9 | 1.00 (0.95-1.04) |  |
|  |  |  |  |  |  |                           | 25.0-25.9 | 0.97 (0.93-1.02) |  |
|  |  |  |  |  |  |                           | 26.0-26.9 | 1.00             |  |
|  |  |  |  |  |  |                           | 27.0-27.9 | 1.07 (1.02-1.13) |  |
|  |  |  |  |  |  |                           | 28.0-28.9 | 1.07 (1.01-1.14) |  |
|  |  |  |  |  |  |                           | 29.0-29.9 | 1.28 (1.19-1.37) |  |
|  |  |  |  |  |  |                           | 30.0-31.4 | 1.31 (1.21-1.42) |  |
|  |  |  |  |  |  |                           | 31.5-32.9 | 1.39 (1.23-1.57) |  |
|  |  |  |  |  |  |                           | 33.0-34.9 | 1.61 (1.36-1.90) |  |
|  |  |  |  |  |  |                           | 35.0-50.0 | 2.02 (1.63-2.52) |  |
|  |  |  |  |  |  | BMI, men, age 45-54 years | <16       | 5.63 (4.90-6.48) |  |
|  |  |  |  |  |  |                           | 16-17.4   | 3.36 (3.12-3.61) |  |
|  |  |  |  |  |  |                           | 17.5-18.9 | 2.39 (2.28-2.50) |  |
|  |  |  |  |  |  |                           | 19.0-19.9 | 1.92 (1.85-2.01) |  |
|  |  |  |  |  |  |                           | 20.0-20.9 | 1.68 (1.62-1.74) |  |
|  |  |  |  |  |  |                           | 21.0-21.9 | 1.42 (1.37-1.48) |  |
|  |  |  |  |  |  |                           | 22.0-22.9 | 1.24 (1.20-1.28) |  |
|  |  |  |  |  |  |                           | 23.0-23.9 | 1.12 (1.08-1.16) |  |
|  |  |  |  |  |  |                           | 24.0-24.9 | 1.05 (1.02-1.09) |  |
|  |  |  |  |  |  |                           | 25.0-25.9 | 1.01 (0.98-1.05) |  |
|  |  |  |  |  |  |                           | 26.0-26.9 | 1.00             |  |
|  |  |  |  |  |  |                           | 27.0-27.9 | 1.06 (1.01-1.10) |  |
|  |  |  |  |  |  |                           | 28.0-28.9 | 1.09 (1.04-1.15) |  |
|  |  |  |  |  |  |                           | 29.0-29.9 | 1.17 (1.11-1.24) |  |
|  |  |  |  |  |  |                           | 30.0-31.4 | 1.27 (1.18-1.35) |  |
|  |  |  |  |  |  |                           | 31.5-32.9 | 1.34 (1.21-1.48) |  |
|  |  |  |  |  |  |                           | 33.0-34.9 | 1.48 (1.26-1.73) |  |
|  |  |  |  |  |  |                           | 35.0-50.0 | 1.60 (1.27-2.02) |  |
|  |  |  |  |  |  | BMI, men, age 55-64 years | <16       | 4.97 (4.59-5.38) |  |
|  |  |  |  |  |  |                           | 16-17.4   | 3.15 (3.00-3.29) |  |
|  |  |  |  |  |  |                           | 17.5-18.9 | 2.21 (2.14-2.28) |  |
|  |  |  |  |  |  |                           | 19.0-19.9 | 1.81 (1.76-1.87) |  |
|  |  |  |  |  |  |                           | 20.0-20.9 | 1.61 (1.56-1.66) |  |
|  |  |  |  |  |  |                           | 21.0-21.9 | 1.39 (1.36-1.43) |  |
|  |  |  |  |  |  |                           | 22.0-22.9 | 1.25 (1.22-1.29) |  |
|  |  |  |  |  |  |                           | 23.0-23.9 | 1.13 (1.10-1.16) |  |
|  |  |  |  |  |  |                           | 24.0-24.9 | 1.05 (1.02-1.08) |  |
|  |  |  |  |  |  |                           | 25.0-25.9 | 1.02 (0.99-1.05) |  |
|  |  |  |  |  |  |                           | 26.0-26.9 | 1.00             |  |

|  |  |  |  |  |  |                           |           |                  |  |
|--|--|--|--|--|--|---------------------------|-----------|------------------|--|
|  |  |  |  |  |  |                           | 27.0-27.9 | 1.00 (0.96-1.03) |  |
|  |  |  |  |  |  |                           | 28.0-28.9 | 1.03 (0.99-1.07) |  |
|  |  |  |  |  |  |                           | 29.0-29.9 | 1.08 (1.03-1.14) |  |
|  |  |  |  |  |  |                           | 30.0-31.4 | 1.11 (1.05-1.18) |  |
|  |  |  |  |  |  |                           | 31.5-32.9 | 1.22 (1.11-1.33) |  |
|  |  |  |  |  |  |                           | 33.0-34.9 | 1.31 (1.13-1.51) |  |
|  |  |  |  |  |  |                           | 35.0-50.0 | 1.47 (1.21-1.80) |  |
|  |  |  |  |  |  | BMI, men, age 65-74 years | <16       | 3.52 (3.33-3.72) |  |
|  |  |  |  |  |  |                           | 16-17.4   | 2.47 (2.39-2.56) |  |
|  |  |  |  |  |  |                           | 17.5-18.9 | 1.87 (1.82-1.92) |  |
|  |  |  |  |  |  |                           | 19.0-19.9 | 1.60 (1.56-1.65) |  |
|  |  |  |  |  |  |                           | 20.0-20.9 | 1.41 (1.37-1.45) |  |
|  |  |  |  |  |  |                           | 21.0-21.9 | 1.31 (1.27-1.34) |  |
|  |  |  |  |  |  |                           | 22.0-22.9 | 1.20 (1.17-1.24) |  |
|  |  |  |  |  |  |                           | 23.0-23.9 | 1.11 (1.08-1.14) |  |
|  |  |  |  |  |  |                           | 24.0-24.9 | 1.04 (1.01-1.06) |  |
|  |  |  |  |  |  |                           | 25.0-25.9 | 0.99 (0.96-1.02) |  |
|  |  |  |  |  |  |                           | 26.0-26.9 | 1.00             |  |
|  |  |  |  |  |  |                           | 27.0-27.9 | 0.96 (0.93-1.00) |  |
|  |  |  |  |  |  |                           | 28.0-28.9 | 1.00 (0.96-1.04) |  |
|  |  |  |  |  |  |                           | 29.0-29.9 | 1.07 (1.01-1.13) |  |
|  |  |  |  |  |  |                           | 30.0-31.4 | 1.07 (1.00-1.14) |  |
|  |  |  |  |  |  |                           | 31.5-32.9 | 1.17 (1.05-1.30) |  |
|  |  |  |  |  |  |                           | 33.0-34.9 | 1.31 (1.12-1.52) |  |
|  |  |  |  |  |  |                           | 35.0-50.0 | 1.37 (1.09-1.71) |  |
|  |  |  |  |  |  | BMI, men, age 75-99 years | <16       | 2.71 (2.54-2.90) |  |
|  |  |  |  |  |  |                           | 16-17.4   | 1.98 (1.89-2.08) |  |
|  |  |  |  |  |  |                           | 17.5-18.9 | 1.62 (1.55-1.69) |  |
|  |  |  |  |  |  |                           | 19.0-19.9 | 1.44 (1.38-1.50) |  |
|  |  |  |  |  |  |                           | 20.0-20.9 | 1.34 (1.29-1.40) |  |
|  |  |  |  |  |  |                           | 21.0-21.9 | 1.23 (1.18-1.29) |  |
|  |  |  |  |  |  |                           | 22.0-22.9 | 1.15 (1.11-1.20) |  |
|  |  |  |  |  |  |                           | 23.0-23.9 | 1.10 (1.05-1.15) |  |
|  |  |  |  |  |  |                           | 24.0-24.9 | 1.03 (0.99-1.08) |  |
|  |  |  |  |  |  |                           | 25.0-25.9 | 1.00 (0.96-1.05) |  |
|  |  |  |  |  |  |                           | 26.0-26.9 | 1.00             |  |
|  |  |  |  |  |  |                           | 27.0-27.9 | 0.98 (0.92-1.04) |  |
|  |  |  |  |  |  |                           | 28.0-28.9 | 0.97 (0.90-1.04) |  |
|  |  |  |  |  |  |                           | 29.0-29.9 | 0.89 (0.81-0.98) |  |
|  |  |  |  |  |  |                           | 30.0-31.4 | 0.98 (0.88-1.10) |  |
|  |  |  |  |  |  |                           | 31.5-32.9 | 1.00 (0.84-1.18) |  |
|  |  |  |  |  |  |                           | 33.0-34.9 | 1.09 (0.79-1.50) |  |
|  |  |  |  |  |  |                           | 35.0-50.0 | 1.33 (0.94-1.89) |  |

|  |  |  |  |  |  |  |                             |           |                  |  |
|--|--|--|--|--|--|--|-----------------------------|-----------|------------------|--|
|  |  |  |  |  |  |  | BMI, women, age 18-34 years | <16       | 1.02 (0.69-1.52) |  |
|  |  |  |  |  |  |  |                             | 16-17.4   | 1.02 (0.85-1.23) |  |
|  |  |  |  |  |  |  |                             | 17.5-18.9 | 1.00 (0.86-1.17) |  |
|  |  |  |  |  |  |  |                             | 19.0-19.9 | 1.03 (0.88-1.21) |  |
|  |  |  |  |  |  |  |                             | 20.0-20.9 | 0.98 (0.84-1.15) |  |
|  |  |  |  |  |  |  |                             | 21.0-21.9 | 1.03 (0.88-1.21) |  |
|  |  |  |  |  |  |  |                             | 22.0-22.9 | 0.99 (0.83-1.17) |  |
|  |  |  |  |  |  |  |                             | 23.0-23.9 | 0.97 (0.81-1.16) |  |
|  |  |  |  |  |  |  |                             | 24.0-24.9 | 1.00             |  |
|  |  |  |  |  |  |  |                             | 25.0-25.9 | 1.11 (0.89-1.39) |  |
|  |  |  |  |  |  |  |                             | 26.0-26.9 | 1.50 (1.19-1.88) |  |
|  |  |  |  |  |  |  |                             | 27.0-27.9 | 1.32 (1.01-1.74) |  |
|  |  |  |  |  |  |  |                             | 28.0-28.9 | 1.29 (0.93-1.78) |  |
|  |  |  |  |  |  |  |                             | 29.0-29.9 | 1.42 (0.98-2.06) |  |
|  |  |  |  |  |  |  |                             | 30.0-31.4 | 1.24 (0.84-1.85) |  |
|  |  |  |  |  |  |  |                             | 31.5-32.9 | 1.06 (0.62-1.83) |  |
|  |  |  |  |  |  |  |                             | 33.0-34.9 | 1.88 (1.13-3.13) |  |
|  |  |  |  |  |  |  |                             | 35.0-50.0 | 2.36 (1.42-3.92) |  |
|  |  |  |  |  |  |  | BMI, women, age 35-44 years | <16       | 4.87 (3.68-6.45) |  |
|  |  |  |  |  |  |  |                             | 16-17.4   | 1.56 (1.32-1.85) |  |
|  |  |  |  |  |  |  |                             | 17.5-18.9 | 1.07 (0.97-1.19) |  |
|  |  |  |  |  |  |  |                             | 19.0-19.9 | 0.93 (0.85-1.02) |  |
|  |  |  |  |  |  |  |                             | 20.0-20.9 | 0.92 (0.85-1.00) |  |
|  |  |  |  |  |  |  |                             | 21.0-21.9 | 0.94 (0.87-1.02) |  |
|  |  |  |  |  |  |  |                             | 22.0-22.9 | 0.94 (0.87-1.02) |  |
|  |  |  |  |  |  |  |                             | 23.0-23.9 | 0.92 (0.85-1.00) |  |
|  |  |  |  |  |  |  |                             | 24.0-24.9 | 1.00             |  |
|  |  |  |  |  |  |  |                             | 25.0-25.9 | 1.02 (0.93-1.12) |  |
|  |  |  |  |  |  |  |                             | 26.0-26.9 | 1.09 (0.99-1.21) |  |
|  |  |  |  |  |  |  |                             | 27.0-27.9 | 1.13 (1.01-1.26) |  |
|  |  |  |  |  |  |  |                             | 28.0-28.9 | 1.18 (1.04-1.34) |  |
|  |  |  |  |  |  |  |                             | 29.0-29.9 | 1.28 (1.10-1.48) |  |
|  |  |  |  |  |  |  |                             | 30.0-31.4 | 1.40 (1.19-1.64) |  |
|  |  |  |  |  |  |  |                             | 31.5-32.9 | 1.36 (1.10-1.67) |  |
|  |  |  |  |  |  |  |                             | 33.0-34.9 | 1.42 (1.08-1.88) |  |
|  |  |  |  |  |  |  |                             | 35.0-50.0 | 1.66 (1.21-2.28) |  |
|  |  |  |  |  |  |  | BMI, women, age 45-54 years | <16       | 4.85 (3.79-6.20) |  |
|  |  |  |  |  |  |  |                             | 16-17.4   | 2.20 (1.90-2.54) |  |
|  |  |  |  |  |  |  |                             | 17.5-18.9 | 1.55 (1.42-1.68) |  |
|  |  |  |  |  |  |  |                             | 19.0-19.9 | 1.18 (1.10-1.28) |  |
|  |  |  |  |  |  |  |                             | 20.0-20.9 | 1.14 (1.07-1.21) |  |
|  |  |  |  |  |  |  |                             | 21.0-21.9 | 1.02 (0.97-1.08) |  |
|  |  |  |  |  |  |  |                             | 22.0-22.9 | 0.97 (0.92-1.03) |  |



|  |  |  |  |  |  |                             |           |           |                  |  |
|--|--|--|--|--|--|-----------------------------|-----------|-----------|------------------|--|
|  |  |  |  |  |  |                             |           | 23.0-23.9 | 1.00 (0.95-1.05) |  |
|  |  |  |  |  |  |                             |           | 24.0-24.9 | 1.00             |  |
|  |  |  |  |  |  |                             |           | 25.0-25.9 | 1.01 (0.96-1.07) |  |
|  |  |  |  |  |  |                             |           | 26.0-26.9 | 1.01 (0.95-1.07) |  |
|  |  |  |  |  |  |                             |           | 27.0-27.9 | 1.08 (1.01-1.15) |  |
|  |  |  |  |  |  |                             |           | 28.0-28.9 | 1.13 (1.05-1.22) |  |
|  |  |  |  |  |  |                             |           | 29.0-29.9 | 1.22 (1.12-1.33) |  |
|  |  |  |  |  |  |                             |           | 30.0-31.4 | 1.26 (1.15-1.38) |  |
|  |  |  |  |  |  |                             |           | 31.5-32.9 | 1.37 (1.22-1.54) |  |
|  |  |  |  |  |  |                             |           | 33.0-34.9 | 1.43 (1.22-1.69) |  |
|  |  |  |  |  |  |                             |           | 35.0-50.0 | 1.73 (1.43-2.09) |  |
|  |  |  |  |  |  | BMI, women, age 55-64 years | <16       |           | 3.89 (3.38-4.49) |  |
|  |  |  |  |  |  |                             | 16-17.4   |           | 2.33 (2.14-2.54) |  |
|  |  |  |  |  |  |                             | 17.5-18.9 |           | 1.81 (1.71-1.91) |  |
|  |  |  |  |  |  |                             | 19.0-19.9 |           | 1.44 (1.37-1.52) |  |
|  |  |  |  |  |  |                             | 20.0-20.9 |           | 1.26 (1.20-1.32) |  |
|  |  |  |  |  |  |                             | 21.0-21.9 |           | 1.16 (1.11-1.20) |  |
|  |  |  |  |  |  |                             | 22.0-22.9 |           | 1.07 (1.03-1.11) |  |
|  |  |  |  |  |  |                             | 23.0-23.9 |           | 1.01 (0.97-1.05) |  |
|  |  |  |  |  |  |                             | 24.0-24.9 |           | 1.00             |  |
|  |  |  |  |  |  |                             | 25.0-25.9 |           | 0.99 (0.95-1.03) |  |
|  |  |  |  |  |  |                             | 26.0-26.9 |           | 1.00 (0.96-1.04) |  |
|  |  |  |  |  |  |                             | 27.0-27.9 |           | 1.00 (0.96-1.05) |  |
|  |  |  |  |  |  |                             | 28.0-28.9 |           | 1.08 (1.03-1.13) |  |
|  |  |  |  |  |  |                             | 29.0-29.9 |           | 1.07 (1.01-1.13) |  |
|  |  |  |  |  |  |                             | 30.0-31.4 |           | 1.20 (1.13-1.28) |  |
|  |  |  |  |  |  |                             | 31.5-32.9 |           | 1.37 (1.27-1.47) |  |
|  |  |  |  |  |  |                             | 33.0-34.9 |           | 1.33 (1.19-1.48) |  |
|  |  |  |  |  |  |                             | 35.0-50.0 |           | 1.72 (1.52-1.95) |  |
|  |  |  |  |  |  | BMI, women, age 65-74 years | <16       |           | 2.53 (2.35-2.72) |  |
|  |  |  |  |  |  |                             | 16-17.4   |           | 1.87 (1.78-1.96) |  |
|  |  |  |  |  |  |                             | 17.5-18.9 |           | 1.58 (1.53-1.64) |  |
|  |  |  |  |  |  |                             | 19.0-19.9 |           | 1.39 (1.34-1.44) |  |
|  |  |  |  |  |  |                             | 20.0-20.9 |           | 1.25 (1.21-1.29) |  |
|  |  |  |  |  |  |                             | 21.0-21.9 |           | 1.17 (1.14-1.21) |  |
|  |  |  |  |  |  |                             | 22.0-22.9 |           | 1.06 (1.03-1.09) |  |
|  |  |  |  |  |  |                             | 23.0-23.9 |           | 1.04 (1.01-1.07) |  |
|  |  |  |  |  |  |                             | 24.0-24.9 |           | 1.00             |  |
|  |  |  |  |  |  |                             | 25.0-25.9 |           | 0.99 (0.96-1.02) |  |
|  |  |  |  |  |  |                             | 26.0-26.9 |           | 0.98 (0.95-1.01) |  |
|  |  |  |  |  |  |                             | 27.0-27.9 |           | 0.99 (0.96-1.03) |  |
|  |  |  |  |  |  |                             | 28.0-28.9 |           | 1.01 (0.98-1.05) |  |
|  |  |  |  |  |  |                             | 29.0-29.9 |           | 1.07 (1.02-1.11) |  |

|  |  |  |  |  |  |                                             |           |           |                  |  |
|--|--|--|--|--|--|---------------------------------------------|-----------|-----------|------------------|--|
|  |  |  |  |  |  |                                             |           | 30.0-31.4 | 1.08 (1.03-1.13) |  |
|  |  |  |  |  |  |                                             |           | 31.5-32.9 | 1.14 (1.07-1.21) |  |
|  |  |  |  |  |  |                                             |           | 33.0-34.9 | 1.19 (1.09-1.30) |  |
|  |  |  |  |  |  |                                             |           | 35.0-50.0 | 1.35 (1.20-1.52) |  |
|  |  |  |  |  |  | BMI, women, age 75-99 years                 | <16       |           | 1.92 (1.80-2.04) |  |
|  |  |  |  |  |  |                                             | 16-17.4   |           | 1.70 (1.63-1.78) |  |
|  |  |  |  |  |  |                                             | 17.5-18.9 |           | 1.46 (1.41-1.51) |  |
|  |  |  |  |  |  |                                             | 19.0-19.9 |           | 1.35 (1.31-1.40) |  |
|  |  |  |  |  |  |                                             | 20.0-20.9 |           | 1.23 (1.19-1.27) |  |
|  |  |  |  |  |  |                                             | 21.0-21.9 |           | 1.17 (1.13-1.21) |  |
|  |  |  |  |  |  |                                             | 22.0-22.9 |           | 1.10 (1.07-1.14) |  |
|  |  |  |  |  |  |                                             | 23.0-23.9 |           | 1.07 (1.04-1.11) |  |
|  |  |  |  |  |  |                                             | 24.0-24.9 |           | 1.00             |  |
|  |  |  |  |  |  |                                             | 25.0-25.9 |           | 0.99 (0.96-1.03) |  |
|  |  |  |  |  |  |                                             | 26.0-26.9 |           | 1.00 (0.96-1.03) |  |
|  |  |  |  |  |  |                                             | 27.0-27.9 |           | 1.00 (0.96-1.04) |  |
|  |  |  |  |  |  |                                             | 28.0-28.9 |           | 1.00 (0.96-1.04) |  |
|  |  |  |  |  |  |                                             | 29.0-29.9 |           | 1.02 (0.97-1.07) |  |
|  |  |  |  |  |  |                                             | 30.0-31.4 |           | 0.99 (0.93-1.05) |  |
|  |  |  |  |  |  |                                             | 31.5-32.9 |           | 1.06 (0.99-1.14) |  |
|  |  |  |  |  |  |                                             | 33.0-34.9 |           | 1.04 (0.94-1.14) |  |
|  |  |  |  |  |  | BMI, men, age 18-44 years,<br>never smokers | 35.0-50.0 |           | 1.12 (0.97-1.29) |  |
|  |  |  |  |  |  |                                             | <17.5     |           | 2.86 (2.45-3.33) |  |
|  |  |  |  |  |  |                                             | 17.5-18.9 |           | 1.61 (1.46-1.79) |  |
|  |  |  |  |  |  |                                             | 19.0-20.4 |           | 1.34 (1.25-1.45) |  |
|  |  |  |  |  |  |                                             | 20.5-21.9 |           | 1.16 (1.09-1.24) |  |
|  |  |  |  |  |  |                                             | 22.0-23.4 |           | 1.07 (1.01-1.14) |  |
|  |  |  |  |  |  |                                             | 23.5-24.9 |           | 0.99 (0.93-1.05) |  |
|  |  |  |  |  |  |                                             | 25.0-26.4 |           | 1.00             |  |
|  |  |  |  |  |  |                                             | 26.5-27.9 |           | 1.08 (1.00-1.16) |  |
|  |  |  |  |  |  |                                             | 28.0-29.4 |           | 1.24 (1.14-1.35) |  |
|  |  |  |  |  |  |                                             | 29.5-30.9 |           | 1.28 (1.13-1.45) |  |
|  |  |  |  |  |  |                                             | 31.0-50.0 |           | 1.68 (1.48-1.90) |  |
|  |  |  |  |  |  | BMI, men, age 45-64 years,<br>never smokers | <17.5     |           | 3.82 (3.59-4.07) |  |
|  |  |  |  |  |  |                                             | 17.5-18.9 |           | 2.20 (2.10-2.31) |  |
|  |  |  |  |  |  |                                             | 19.0-20.4 |           | 1.73 (1.67-1.79) |  |
|  |  |  |  |  |  |                                             | 20.5-21.9 |           | 1.40 (1.36-1.44) |  |
|  |  |  |  |  |  |                                             | 22.0-23.4 |           | 1.18 (1.15-1.21) |  |
|  |  |  |  |  |  |                                             | 23.5-24.9 |           | 1.05 (1.02-1.07) |  |
|  |  |  |  |  |  |                                             | 25.0-26.4 |           | 1.00             |  |
|  |  |  |  |  |  |                                             | 26.5-27.9 |           | 1.01 (0.98-1.05) |  |
|  |  |  |  |  |  |                                             | 28.0-29.4 |           | 1.11 (1.07-1.15) |  |
|  |  |  |  |  |  |                                             | 29.5-30.9 |           | 1.16 (1.09-1.23) |  |



|  |  |  |  |  |  |                                               |           |                  |  |
|--|--|--|--|--|--|-----------------------------------------------|-----------|------------------|--|
|  |  |  |  |  |  |                                               | 29.5-30.9 | 1.08 (0.96-1.22) |  |
|  |  |  |  |  |  |                                               | 31.0-50.0 | 1.21 (1.05-1.41) |  |
|  |  |  |  |  |  | BMI, men, age 18-44 years,<br>current smokers | <17.5     | 2.32 (2.10-2.55) |  |
|  |  |  |  |  |  |                                               | 17.5-18.9 | 1.86 (1.76-1.96) |  |
|  |  |  |  |  |  |                                               | 19.0-20.4 | 1.55 (1.48-1.62) |  |
|  |  |  |  |  |  |                                               | 20.5-21.9 | 1.35 (1.30-1.41) |  |
|  |  |  |  |  |  |                                               | 22.0-23.4 | 1.16 (1.11-1.20) |  |
|  |  |  |  |  |  |                                               | 23.5-24.9 | 1.04 (1.00-1.08) |  |
|  |  |  |  |  |  |                                               | 25.0-26.4 | 1.00             |  |
|  |  |  |  |  |  |                                               | 26.5-27.9 | 1.09 (1.04-1.15) |  |
|  |  |  |  |  |  |                                               | 28.0-29.4 | 1.15 (1.09-1.21) |  |
|  |  |  |  |  |  |                                               | 29.5-30.9 | 1.37 (1.27-1.48) |  |
|  |  |  |  |  |  | BMI, men, age 45-64 years,<br>current smokers | 31.0-50.0 | 1.55 (1.43-1.68) |  |
|  |  |  |  |  |  |                                               | <17.5     | 3.21 (3.07-3.35) |  |
|  |  |  |  |  |  |                                               | 17.5-18.9 | 2.20 (2.13-2.27) |  |
|  |  |  |  |  |  |                                               | 19.0-20.4 | 1.77 (1.72-1.81) |  |
|  |  |  |  |  |  |                                               | 20.5-21.9 | 1.45 (1.42-1.49) |  |
|  |  |  |  |  |  |                                               | 22.0-23.4 | 1.20 (1.18-1.23) |  |
|  |  |  |  |  |  |                                               | 23.5-24.9 | 1.05 (1.02-1.07) |  |
|  |  |  |  |  |  |                                               | 25.0-26.4 | 1.00             |  |
|  |  |  |  |  |  |                                               | 26.5-27.9 | 1.00 (0.97-1.03) |  |
|  |  |  |  |  |  |                                               | 28.0-29.4 | 0.99 (0.95-1.03) |  |
|  |  |  |  |  |  |                                               | 29.5-30.9 | 1.12 (1.06-1.19) |  |
|  |  |  |  |  |  | BMI, men, age 65-99 years,<br>current smokers | 31.0-50.0 | 1.19 (1.10-1.28) |  |
|  |  |  |  |  |  |                                               | <17.5     | 2.13 (2.05-2.21) |  |
|  |  |  |  |  |  |                                               | 17.5-18.9 | 1.63 (1.57-1.68) |  |
|  |  |  |  |  |  |                                               | 19.0-20.4 | 1.41 (1.37-1.46) |  |
|  |  |  |  |  |  |                                               | 20.5-21.9 | 1.24 (1.21-1.28) |  |
|  |  |  |  |  |  |                                               | 22.0-23.4 | 1.14 (1.11-1.18) |  |
|  |  |  |  |  |  |                                               | 23.5-24.9 | 1.06 (1.02-1.09) |  |
|  |  |  |  |  |  |                                               | 25.0-26.4 | 1.00             |  |
|  |  |  |  |  |  |                                               | 26.5-27.9 | 0.99 (0.95-1.04) |  |
|  |  |  |  |  |  |                                               | 28.0-29.4 | 1.00 (0.94-1.07) |  |
|  |  |  |  |  |  |                                               | 29.5-30.9 | 1.11 (1.01-1.22) |  |
|  |  |  |  |  |  | BMI, women, age 18-44<br>years, never smokers | 31.0-50.0 | 1.21 (1.07-1.37) |  |
|  |  |  |  |  |  |                                               | <18.5     | 1.15 (1.06-1.24) |  |
|  |  |  |  |  |  |                                               | 18.5-21.0 | 0.98 (0.93-1.03) |  |
|  |  |  |  |  |  |                                               | 21.0-23.0 | 0.99 (0.94-1.05) |  |
|  |  |  |  |  |  |                                               | 23.0-25.0 | 1.00             |  |
|  |  |  |  |  |  |                                               | 25.0-27.5 | 1.15 (1.08-1.22) |  |
|  |  |  |  |  |  |                                               | 27.5-30.0 | 1.30 (1.19-1.41) |  |
|  |  |  |  |  |  |                                               | 30.0-50.0 | 1.56 (1.40-1.74) |  |
|  |  |  |  |  |  | BMI, women, age 45-64                         | <18.5     | 2.13 (2.03-2.23) |  |

|  |  |  |  |  |  |                        |           |                  |  |
|--|--|--|--|--|--|------------------------|-----------|------------------|--|
|  |  |  |  |  |  | years, never smokers   | 18.5-21.0 | 1.30 (1.26-1.34) |  |
|  |  |  |  |  |  |                        | 21.0-23.0 | 1.07 (1.04-1.10) |  |
|  |  |  |  |  |  |                        | 23.0-25.0 | 1.00             |  |
|  |  |  |  |  |  |                        | 25.0-27.5 | 1.00 (0.98-1.03) |  |
|  |  |  |  |  |  |                        | 27.5-30.0 | 1.10 (1.07-1.13) |  |
|  |  |  |  |  |  |                        | 30.0-50.0 | 1.32 (1.27-1.37) |  |
|  |  |  |  |  |  | BMI, women, age 65-99  | <18.5     | 1.70 (1.66-1.74) |  |
|  |  |  |  |  |  | years, never smokers   | 18.5-21.0 | 1.28 (1.26-1.31) |  |
|  |  |  |  |  |  |                        | 21.0-23.0 | 1.10 (1.08-1.12) |  |
|  |  |  |  |  |  |                        | 23.0-25.0 | 1.00             |  |
|  |  |  |  |  |  |                        | 25.0-27.5 | 0.96 (0.94-0.98) |  |
|  |  |  |  |  |  |                        | 27.5-30.0 | 1.00 (0.97-1.02) |  |
|  |  |  |  |  |  |                        | 30.0-50.0 | 1.07 (1.04-1.11) |  |
|  |  |  |  |  |  | BMI, women, age 18-44  | <18.5     | 0.94 (0.62-1.43) |  |
|  |  |  |  |  |  | years, former smokers  | 18.5-21.0 | 0.75 (0.55-1.02) |  |
|  |  |  |  |  |  |                        | 21.0-23.0 | 0.69 (0.50-0.95) |  |
|  |  |  |  |  |  |                        | 23.0-25.0 | 1.00             |  |
|  |  |  |  |  |  |                        | 25.0-27.5 | 0.74 (0.49-1.11) |  |
|  |  |  |  |  |  |                        | 27.5-30.0 | 0.59 (0.31-1.15) |  |
|  |  |  |  |  |  |                        | 30.0-50.0 | 0.99 (0.51-1.93) |  |
|  |  |  |  |  |  | BMI, women, age 45-64  | <18.5     | 1.70 (1.13-2.55) |  |
|  |  |  |  |  |  | years, former smokers  | 18.5-21.0 | 1.41 (1.12-1.77) |  |
|  |  |  |  |  |  |                        | 21.0-23.0 | 0.90 (0.73-1.11) |  |
|  |  |  |  |  |  |                        | 23.0-25.0 | 1.00             |  |
|  |  |  |  |  |  |                        | 25.0-27.5 | 1.05 (0.86-1.27) |  |
|  |  |  |  |  |  |                        | 27.5-30.0 | 0.86 (0.66-1.11) |  |
|  |  |  |  |  |  |                        | 30.0-50.0 | 1.21 (0.88-1.67) |  |
|  |  |  |  |  |  | BMI, women, age 65-99  | <18.5     | 1.66 (1.45-1.89) |  |
|  |  |  |  |  |  | years, former smokers  | 18.5-21.0 | 1.37 (1.24-1.53) |  |
|  |  |  |  |  |  |                        | 21.0-23.0 | 1.03 (0.92-1.14) |  |
|  |  |  |  |  |  |                        | 23.0-25.0 | 1.00             |  |
|  |  |  |  |  |  |                        | 25.0-27.5 | 0.99 (0.89-1.11) |  |
|  |  |  |  |  |  |                        | 27.5-30.0 | 0.97 (0.84-1.13) |  |
|  |  |  |  |  |  |                        | 30.0-50.0 | 1.18 (0.97-1.44) |  |
|  |  |  |  |  |  | BMI, women, age 18-44  | <18.5     | 1.32 (1.00-1.75) |  |
|  |  |  |  |  |  | years, current smokers | 18.5-21.0 | 1.12 (0.91-1.39) |  |
|  |  |  |  |  |  |                        | 21.0-23.0 | 1.21 (0.98-1.49) |  |
|  |  |  |  |  |  |                        | 23.0-25.0 | 1.00             |  |
|  |  |  |  |  |  |                        | 25.0-27.5 | 1.12 (0.86-1.45) |  |
|  |  |  |  |  |  |                        | 27.5-30.0 | 1.55 (1.14-2.10) |  |
|  |  |  |  |  |  |                        | 30.0-50.0 | 1.19 (0.79-1.80) |  |
|  |  |  |  |  |  | BMI, women, age 45-64  | <18.5     | 1.97 (1.71-2.28) |  |
|  |  |  |  |  |  | years, current smokers | 18.5-21.0 | 1.26 (1.13-1.40) |  |

|                        |                                                                          |                                       |                                                         |          |    |    |                                                                                                                                                                                                                                                                                                                                                                                                                                   |                                                                                                                                                                                                                                                                                                                                                                                                                                                                                                                                                                                                                                       |                                                                                                                                                                                                                                                                                                                                              |  |
|------------------------|--------------------------------------------------------------------------|---------------------------------------|---------------------------------------------------------|----------|----|----|-----------------------------------------------------------------------------------------------------------------------------------------------------------------------------------------------------------------------------------------------------------------------------------------------------------------------------------------------------------------------------------------------------------------------------------|---------------------------------------------------------------------------------------------------------------------------------------------------------------------------------------------------------------------------------------------------------------------------------------------------------------------------------------------------------------------------------------------------------------------------------------------------------------------------------------------------------------------------------------------------------------------------------------------------------------------------------------|----------------------------------------------------------------------------------------------------------------------------------------------------------------------------------------------------------------------------------------------------------------------------------------------------------------------------------------------|--|
|                        |                                                                          |                                       |                                                         |          |    |    |                                                                                                                                                                                                                                                                                                                                                                                                                                   | 21.0-23.0<br>23.0-25.0<br>25.0-27.5<br>27.5-30.0<br>30.0-50.0<br><18.5<br>18.5-21.0<br>21.0-23.0<br>23.0-25.0<br>25.0-27.5<br>27.5-30.0<br>30.0-50.0                                                                                                                                                                                                                                                                                                                                                                                                                                                                                  | 1.05 (0.95-1.16)<br>1.00<br>0.89 (0.80-0.98)<br>0.89 (0.78-1.01)<br>1.13 (0.97-1.32)<br>1.48 (1.39-1.56)<br>1.18 (1.12-1.24)<br>1.03 (0.98-1.09)<br>1.00<br>0.94 (0.88-1.00)<br>0.98 (0.90-1.07)<br>0.88 (0.77-1.01)                                                                                                                         |  |
| Lu JL et al, 2015, USA | Racial and Cardiovascular Risk Anomalies in Chronic Kidney Disease study | 2004-2006 – 2013, 6.8 years follow-up | 3376187 men and women, mean age 60 years: 672341 deaths | Measured | No | No | BMI, age <40 years<br><20<br>20-<25<br>25-<30<br>30-<35<br>35-<40<br>≥40<br>BMI, age 40-<50 years<br><20<br>20-<25<br>25-<30<br>30-<35<br>35-<40<br>≥40<br>BMI, age 50-<60 years<br><20<br>20-<25<br>25-<30<br>30-<35<br>35-<40<br>≥40<br>BMI, age 60-<70 years<br><20<br>20-<25<br>25-<30<br>30-<35<br>35-<40<br>≥40<br>BMI, age 70-<80 years<br><20<br>20-<25<br>25-<30<br>30-<35<br>35-<40<br>≥40<br>BMI, age ≥80 years<br><20 | 1.00<br>0.50 (0.43-0.58)<br>0.39 (0.34-0.46)<br>0.38 (0.33-0.45)<br>0.36 (0.30-0.42)<br>0.52 (0.43-0.62)<br>4.09 (3.53-4.74)<br>1.92 (1.67-2.21)<br>1.31 (1.13-1.50)<br>1.10 (0.95-1.27)<br>1.16 (1.01-1.35)<br>1.46 (1.26-1.69)<br>7.10 (6.17-8.18)<br>3.72 (3.23-4.28)<br>2.31 (2.01-2.66)<br>1.98 (1.72-2.27)<br>2.02 (1.75-2.32)<br>2.44 (2.12-2.81)<br>11.27 (9.78-12.98)<br>5.96 (5.18-6.86)<br>3.63 (3.15-4.18)<br>3.21 (2.79-3.69)<br>3.42 (2.97-3.93)<br>4.11 (3.56-4.74)<br>17.19 (14.93-19.79)<br>9.97 (8.66-11.47)<br>7.06 (6.13-8.12)<br>6.39 (5.55-7.36)<br>6.76 (5.87-7.79)<br>8.08 (6.99-9.33)<br>26.34 (22.87-30.33) | Sex, Index eGFR, race, marital status, income, Charlson Comorbidity Index, cerebrovascular disease, congestive heart failure, peripheral artery disease, malignancies, liver disease, rheumatoid disease, lung disease, Aids, depression, cardiovascular disease, statin use, angiotensin converting enzyme inhibitor, anti-hypertensive use |  |



|                                     |                                |                                       |                                                         |          |                                                                |    |                                                                              |                                                                                                                                                                                                                                                                  |                                                                                                                                                                                                                                                                                                          |                                                                                      |
|-------------------------------------|--------------------------------|---------------------------------------|---------------------------------------------------------|----------|----------------------------------------------------------------|----|------------------------------------------------------------------------------|------------------------------------------------------------------------------------------------------------------------------------------------------------------------------------------------------------------------------------------------------------------|----------------------------------------------------------------------------------------------------------------------------------------------------------------------------------------------------------------------------------------------------------------------------------------------------------|--------------------------------------------------------------------------------------|
|                                     |                                |                                       |                                                         |          |                                                                |    | BMI, all women                                                               | $\geq 30.0$<br>$< 20.0$<br>20.0-24.9<br>25.0-26.9<br>27.0-29.9<br>$\geq 30.0$                                                                                                                                                                                    | 1.22 (1.03-1.44)<br>1.01 (0.82-1.23)<br>1.00<br>1.04 (0.86-1.26)<br>1.12 (0.93-1.35)<br>1.21 (1.00-1.45)                                                                                                                                                                                                 |                                                                                      |
| Ganna A et al, 2015, United Kingdom | UK Biobank Study               | 2007-2010 – 2014, 4.9 years follow-up | 498103 men and women, age 37-73 years: 5224/3308 deaths | Measured | Charlson comorbidity index >0 excluded in sensitivity analyses | No | BMI, men<br><br>BMI, healthy men<br><br>BMI, women<br><br>BMI, healthy women | 12.8-23.6<br>23.6-25.8<br>25.8-28.0<br>28.0-31.2<br>31.2-68.4<br>12.8-23.6<br>23.6-25.8<br>25.8-28.0<br>28.0-31.2<br>31.2-68.4<br>12.8-23.6<br>23.6-25.8<br>25.8-28.0<br>28.0-31.2<br>31.2-68.4<br>12.8-23.6<br>23.6-25.8<br>25.8-28.0<br>28.0-31.2<br>31.2-68.4 | 1.2 (1.1-1.4)<br>0.9 (0.9-1.0)<br>0.9 (0.8-1.0)<br>1.0<br>1.4 (1.3-1.5)<br>1.2 (1.0-1.3)<br>1.0 (0.8-1.1)<br>1.0 (0.8-1.1)<br>1.0<br>1.3 (1.1-1.5)<br>1.0<br>0.9 (0.8-1.0)<br>0.9 (0.8-1.0)<br>0.9 (0.8-1.0)<br>1.1 (1.0-1.3)<br>1.0<br>0.9 (0.8-1.1)<br>1.0 (0.8-1.1)<br>0.9 (0.8-1.1)<br>1.2 (1.0-1.4) | Age                                                                                  |
| Graf CE et al, 2015, Switzerland    | Geneva University Hospitals    | 1990-2011, 6.2 years follow-up        | 3181 men and women, age $\geq 65$ years: 1007 deaths    | Measured | No                                                             | No | BMI, men<br><br>BMI, women                                                   | <18.5<br>18.5-24.9<br>25.0-29.9<br>30.0-34.9<br>$\geq 35.0$<br><18.5<br>18.5-24.9<br>25.0-29.9<br>30.0-34.9<br>$\geq 35.0$                                                                                                                                       | 1.36 (1.11-1.68)<br>1.00<br>0.76 (0.66-0.88)<br>0.53 (0.40-0.70)<br>0.76 (0.53-1.08)<br>1.37 (1.11-1.69)<br>1.00<br>0.89 (0.74-1.07)<br>1.02 (0.80-1.30)<br>0.86 (0.61-1.21)                                                                                                                             | Age, smoking status, type of subject (ambulatory versus hospitalized), calendar time |
| Mirbolouk M et al, 2015, Iran       | Tehran Lipid and Glucose Study | 1999-2001 – 2010, 9.74 years          | 1199 men and women, age $\geq 65$ years: 239 deaths     | Measured | No                                                             | No | BMI, without metabolic syndrome<br><br>BMI, with metabolic syndrome          | <25<br>25-<30<br>$\geq 30$<br><25<br>25-<30<br>$\geq 30$                                                                                                                                                                                                         | 1.41 (0.91-2.23)<br>1.00<br>1.33 (0.51-3.47)<br>1.84 (1.18-3.09)<br>1.46 (0.93-2.34)<br>1.59 (0.91-2.56)                                                                                                                                                                                                 | Age, sex, smoking status, total cholesterol, lipid lowering drugs                    |



|                        |                                |                    |                                       |               |    |    |                    |            |                  |                                                                                                                                                                                   |
|------------------------|--------------------------------|--------------------|---------------------------------------|---------------|----|----|--------------------|------------|------------------|-----------------------------------------------------------------------------------------------------------------------------------------------------------------------------------|
| Cao B et al, 2015, USA | US Health and Retirement Study | 1992/1998 – NA, NA | 8678 men and women, age ≥50 years: NA | Self-reported | No | No | BMI, never smokers | <18.5      | 1.85 (1.08-3.03) | Age, sex, race/ethnicity, education, household income, physical activity, previous chronic diseases (diabetes, cancer, lung disease, heart problem, stroke), self-reported health |
|                        |                                |                    |                                       |               |    |    |                    | 18.5-<25.0 | 1.00             |                                                                                                                                                                                   |
|                        |                                |                    |                                       |               |    |    |                    | 25.0-<30.0 | 0.88 (0.76-1.02) |                                                                                                                                                                                   |
|                        |                                |                    |                                       |               |    |    |                    | 30.0-<35.0 | 1.01 (0.89-1.15) |                                                                                                                                                                                   |
|                        |                                |                    |                                       |               |    |    |                    | ≥35.0      | 1.89 (1.54-2.34) |                                                                                                                                                                                   |
|                        |                                |                    |                                       |               |    |    | BMI, ever smokers  | <18.5      | 4.23 (2.02-8.55) |                                                                                                                                                                                   |
|                        |                                |                    |                                       |               |    |    |                    | 18.5-<25.0 | 1.00             |                                                                                                                                                                                   |
|                        |                                |                    |                                       |               |    |    |                    | 25.0-<30.0 | 0.96 (0.76-1.21) |                                                                                                                                                                                   |
|                        |                                |                    |                                       |               |    |    |                    | 30.0-<35.0 | 1.09 (0.89-1.34) |                                                                                                                                                                                   |
|                        |                                |                    |                                       |               |    |    |                    | ≥35.0      | 1.74 (1.29-2.35) |                                                                                                                                                                                   |

ADL; activity of daily living, BMI; body mass index, CAD; coronary artery disease, CHD; coronary heart disease, CVD; cardiovascular disease, COPD; chronic obstructive pulmonary disease, CRP; C-reactive protein, DM; diabetes mellitus, ECG; electrocardiography, eGFR; estimated glomerular filtration rate, E%; energy percentage, FEV1; forced expiratory volume in 1 second, FH; family history, HDL; high-density lipoprotein, HRT; hormone replacement therapy, IADL; instrumental activities of daily living, IHD; ischemic heart disease, IL-6; interleukin-6, kg; kilogram, LDL; low-density lipoprotein, MET; metabolic equivalent tasks, metsyn; metabolic syndrome, MI; myocardial infarction, MMSE; mini-mental state examination, NA: not available, OC use; oral contraceptive use, PAD; peripheral artery disease, PH; parental history, SBP; systolic blood pressure, SES; socio-economic status, SFA; saturated fatty acids, TG; triglycerides, TNF-alpha; tumor necrosis factor alpha, WHI; Women’s Health Initiative, WHR; waist-to-hip ratio

Table C: Subgroup analyses of BMI and all cause mortality in never smokers, per 5 units increase in BMI

|                                           | <b>BMI</b> |                     |                           |                                    |                                    |      |
|-------------------------------------------|------------|---------------------|---------------------------|------------------------------------|------------------------------------|------|
|                                           | <i>n</i>   | RR (95% CI)         | <i>I</i> <sup>2</sup> (%) | <i>P</i> <sub>h</sub> <sup>1</sup> | <i>P</i> <sub>h</sub> <sup>2</sup> |      |
| All studies                               | 44         | 1.18 (1.15 to 1.21) | 95.5                      | <0.0001                            |                                    |      |
| Sex                                       |            |                     |                           |                                    |                                    |      |
| Men                                       | 30         | 1.21 (1.16 to 1.27) | 92.7                      | <0.0001                            | 0.12/<br>0.40                      |      |
| Women                                     | 28         | 1.17 (1.14 to 1.21) | 94.9                      | <0.0001                            |                                    |      |
| Men and women                             | 7          | 1.11 (1.03 to 1.20) | 91.9                      | <0.0001                            |                                    |      |
| Assessment of weight/height               |            |                     |                           |                                    |                                    |      |
| Measured                                  | 23         | 1.14 (1.07 to 1.20) | 95.5                      | <0.0001                            | 0.14                               |      |
| Self-reported                             | 20         | 1.22 (1.19 to 1.25) | 91.4                      | <0.0001                            |                                    |      |
| Measured and self-reported                | 1          | 1.32 (1.07 to 1.62) | NC                        | NC                                 |                                    |      |
| Unclear                                   | 0          |                     |                           |                                    |                                    |      |
| Duration of follow-up                     |            |                     |                           |                                    |                                    |      |
| <5 years follow-up                        | 1          | 1.21 (1.14 to 1.28) | NC                        | NC                                 | 0.02                               |      |
| 5-<10                                     | 11         | 1.11 (0.94 to 1.30) | 96.6                      | <0.0001                            |                                    |      |
| 10-<15                                    | 18         | 1.18 (1.14 to 1.22) | 94.7                      | <0.0001                            |                                    |      |
| 15-<20                                    | 4          | 1.24 (1.09 to 1.40) | 86.6                      | <0.0001                            |                                    |      |
| 20-<25                                    | 2          | 1.30 (1.19 to 1.42) | 92.8                      | <0.0001                            |                                    |      |
| ≥25                                       | 7          | 1.25 (1.20 to 1.30) | 61.5                      | 0.02                               |                                    |      |
| Geographic location                       |            |                     |                           |                                    |                                    |      |
| Europe                                    | 11         | 1.18 (1.11 to 1.25) | 81.9                      | <0.0001                            | 0.90                               |      |
| North-America                             | 20         | 1.21 (1.17 to 1.24) | 92.3                      | <0.0001                            |                                    |      |
| Australia                                 | 2          | 1.19 (1.11 to 1.27) | 18.0                      | 0.27                               |                                    |      |
| Asia                                      | 11         | 1.17 (1.05 to 1.29) | 96.8                      | <0.0001                            |                                    |      |
| Number of deaths                          |            |                     |                           |                                    |                                    |      |
| <500                                      | 11         | 1.14 (1.01 to 1.28) | 77.7                      | <0.0001                            | 0.70                               |      |
| 500-<1000                                 | 5          | 1.24 (1.13 to 1.36) | 58.1                      | 0.05                               |                                    |      |
| 1000-<5000                                | 15         | 1.19 (1.08 to 1.31) | 97.2                      | <0.0001                            |                                    |      |
| 5000-<10000                               | 3          | 1.22 (1.13 to 1.33) | 94.6                      | <0.0001                            |                                    |      |
| ≥10000                                    | 6          | 1.18 (1.13 to 1.22) | 98.2                      | <0.0001                            |                                    |      |
| Study quality                             |            |                     |                           |                                    |                                    |      |
| 0-3                                       | 0          |                     |                           |                                    | 0.73                               |      |
| 4-6                                       | 13         | 1.20 (1.14 to 1.26) | 86.9                      | <0.0001                            |                                    |      |
| 7-9                                       | 31         | 1.17 (1.13 to 1.21) | 96.3                      | <0.0001                            |                                    |      |
| Adjustment for confounders                |            |                     |                           |                                    |                                    |      |
| Age                                       | Yes        | 43                  | 1.18 (1.15 to 1.21)       | 94.6                               | <0.0001                            | 0.65 |
|                                           | No         | 1                   | 1.11 (1.10 to 1.13)       |                                    |                                    |      |
| Education                                 | Yes        | 16                  | 1.16 (1.10 to 1.23)       | 97.1                               | <0.0001                            | 0.62 |
|                                           | No         | 28                  | 1.19 (1.15 to 1.23)       | 93.2                               | <0.0001                            |      |
| Alcohol                                   | Yes        | 22                  | 1.17 (1.14 to 1.21)       | 91.0                               | <0.0001                            | 0.70 |
|                                           | No         | 21                  | 1.19 (1.13 to 1.25)       | 96.8                               | <0.0001                            |      |
| Physical activity                         | Yes        | 16                  | 1.21 (1.17 to 1.25)       | 88.3                               | <0.0001                            | 0.30 |
|                                           | No         | 28                  | 1.16 (1.11 to 1.21)       | 96.4                               | <0.0001                            |      |
| Height                                    | Yes        | 2                   | 1.26 (1.22 to 1.31)       | 49.5                               | 0.16                               | 0.46 |
|                                           | No         | 42                  | 1.17 (1.14 to 1.21)       | 95.4                               | <0.0001                            |      |
| Waist circumference or waist-to-hip ratio | Yes        | 0                   |                           |                                    |                                    | NC   |
|                                           | No         | 44                  | 1.18 (1.15 to 1.21)       | 95.5                               | <0.0001                            |      |
| Dietary pattern                           | Yes        | 3                   | 1.17 (1.13 to 1.22)       | 0                                  | 0.84                               | 0.93 |
|                                           | No         | 41                  | 1.18 (1.15 to 1.21)       | 95.6                               | <0.0001                            |      |
| Fat intake                                | Yes        | 3                   | 1.19 (1.11 to 1.28)       | 87.4                               | <0.0001                            | 0.66 |
|                                           | No         | 41                  | 1.18 (1.14 to 1.22)       | 95.5                               | <0.0001                            |      |
| Fruit, vegetables                         | Yes        | 2                   | 1.29 (1.08 to 1.52)       | 72.4                               | 0.06                               | 0.39 |
|                                           | No         | 42                  | 1.18 (1.14 to 1.22)       | 95.4                               | <0.0001                            |      |

| Adjustment for potential intermediates                                                                                                        |            |     |                     |                     |         |         |      |
|-----------------------------------------------------------------------------------------------------------------------------------------------|------------|-----|---------------------|---------------------|---------|---------|------|
| Diabetes                                                                                                                                      | Yes        | 2   | 0.99 (0.76 to 1.29) | 89.6                | 0.002   | 0.10    |      |
|                                                                                                                                               | No         | 42  | 1.19 (1.15 to 1.22) | 95.4                | <0.0001 |         |      |
| Hypertension                                                                                                                                  | Yes        | 2   | 0.99 (0.76 to 1.29) | 89.6                | 0.002   | 0.10    |      |
|                                                                                                                                               | No         | 42  | 1.19 (1.15 to 1.22) | 95.4                | <0.0001 |         |      |
| Cholesterol                                                                                                                                   | Yes        | 1   | 0.85 (0.72 to 1.01) | NC                  | NC      | 0.04    |      |
|                                                                                                                                               | No         | 43  | 1.18 (1.15 to 1.22) | 95.3                | <0.0001 |         |      |
| Studies with adjustment for age, smoking, alcohol, and physical activity and without adjustment for prevalent disease or intermediate factors |            |     |                     |                     |         |         |      |
| Adjustment for main confounders, but not for intermediates                                                                                    | Yes        | 9   | 1.23 (1.16 to 1.31) | 90.2                | <0.0001 | 0.35    |      |
|                                                                                                                                               | No         | 35  | 1.16 (1.13 to 1.20) | 95.7                | <0.0001 |         |      |
| Studies with adjustment for main confounders, but not intermediates, stratified by duration of follow-up                                      | <10 years  | Yes | 3                   | 1.29 (1.20 to 1.38) | 30.3    | 0.24    | 0.10 |
|                                                                                                                                               |            | No  | 9                   | 1.05 (0.89 to 1.23) | 95.5    | <0.0001 |      |
|                                                                                                                                               | 10-<br><15 | Yes | 5                   | 1.17 (1.08 to 1.27) | 91.5    | <0.0001 | 0.93 |
|                                                                                                                                               |            | No  | 13                  | 1.18 (1.13 to 1.23) | 95.5    | <0.0001 |      |
|                                                                                                                                               | ≥15        | Yes | 1                   | 1.36 (1.13 to 1.41) | NC      | NC      | 0.22 |
|                                                                                                                                               |            | No  | 12                  | 1.24 (1.19 to 1.28) | 87.6    | <0.0001 |      |

$n$ =number of risk estimates, the number of risk estimates does not always add up to the total because of missing information in some studies

RR=relative risk, CI=confidence interval

$P_h^1$ =p for heterogeneity within each subgroup

$P_h^2$ =p for heterogeneity between subgroups using meta-regression analyses

Table D: Body mass index and all cause mortality, all participants and never smokers, stratified by sex, nonlinear dose-response

|          | Never smokers, all studies | Never smokers, men  | Never smokers, women | Never smokers, men and women     | All participants, all studies | All participants, men | All participants, women | All participants, men and women  |
|----------|----------------------------|---------------------|----------------------|----------------------------------|-------------------------------|-----------------------|-------------------------|----------------------------------|
| <i>n</i> | 44                         | 29                  | 28                   | 7                                | 198                           | 103                   | 92                      | 74                               |
| BMI      | RR (95% CI)                | RR (95% CI)         | RR (95% CI)          | RR (95% CI)                      | RR (95% CI)                   | RR (95% CI)           | RR (95% CI)             | RR (95% CI)                      |
| 15       | 2.01 (1.80 to 2.24)        | 2.65 (2.28 to 3.08) | 1.72 (1.49 to 1.98)  |                                  | 2.24 (2.15 to 2.34)           | 2.50 (2.34 to 2.67)   | 2.05 (1.89 to 2.22)     |                                  |
| 16       | 1.66 (1.51 to 1.83)        | 2.05 (1.80 to 2.33) | 1.48 (1.31 to 1.67)  | 1.40 (1.21 to 1.62) <sup>1</sup> | 1.83 (1.77 to 1.91)           | 1.98 (1.87 to 2.10)   | 1.71 (1.60 to 1.84)     | 1.59 (1.54 to 1.65) <sup>1</sup> |
| 17.5     | 1.35 (1.25 to 1.45)        | 1.54 (1.39 to 1.70) | 1.25 (1.13 to 1.37)  | 1.30 (1.15 to 1.47)              | 1.47 (1.43 to 1.51)           | 1.54 (1.47 to 1.61)   | 1.41 (1.33 to 1.49)     | 1.45 (1.41 to 1.50)              |
| 20       | 1.10 (1.05 to 1.14)        | 1.15 (1.09 to 1.21) | 1.06 (1.01 to 1.12)  | 1.09 (1.03 to 1.16)              | 1.15 (1.13 to 1.17)           | 1.17 (1.14 to 1.20)   | 1.13 (1.10 to 1.17)     | 1.16 (1.14 to 1.18)              |
| 22       | 1.01 (1.00 to 1.03)        | 1.02 (1.01 to 1.04) | 1.01 (0.99 to 1.02)  | 1.02 (1.00 to 1.04)              | 1.03 (1.02 to 1.04)           | 1.03 (1.02 to 1.04)   | 1.03 (1.02 to 1.04)     | 1.04 (1.03 to 1.04)              |
| 23       | 1.00                       | 1.00                | 1.00                 | 1.00                             | 1.00                          | 1.00                  | 1.00                    | 1.00                             |
| 24       | 1.00 (0.98 to 1.01)        | 0.99 (0.97 to 1.01) | 1.00 (0.99 to 1.02)  | 0.99 (0.97 to 1.01)              | 0.98 (0.97 to 0.99)           | 0.98 (0.97 to 0.99)   | 0.98 (0.97 to 0.99)     | 0.97 (0.96 to 0.98)              |
| 25       | 1.01 (0.98 to 1.03)        | 1.00 (0.96 to 1.03) | 1.02 (0.98 to 1.05)  | 0.99 (0.96 to 1.03)              | 0.97 (0.96 to 0.98)           | 0.97 (0.96 to 0.99)   | 0.97 (0.95 to 0.99)     | 0.96 (0.95 to 0.97)              |
| 27.5     | 1.07 (1.01 to 1.14)        | 1.07 (0.99 to 1.16) | 1.09 (1.01 to 1.18)  | 1.03 (0.95 to 1.12)              | 0.98 (0.96 to 1.01)           | 1.00 (0.96 to 1.03)   | 0.99 (0.94 to 1.03)     | 0.96 (0.93 to 0.98)              |
| 30       | 1.20 (1.09 to 1.32)        | 1.23 (1.08 to 1.39) | 1.21 (1.07 to 1.37)  | 1.12 (0.98 to 1.27)              | 1.04 (1.00 to 1.08)           | 1.08 (1.02 to 1.14)   | 1.04 (0.97 to 1.12)     | 1.00 (0.97 to 1.04)              |
| 32.5     | 1.39 (1.22 to 1.58)        | 1.48 (1.24 to 1.75) | 1.39 (1.18 to 1.64)  | 1.25 (1.05 to 1.49)              | 1.14 (1.09 to 1.20)           | 1.21 (1.12 to 1.31)   | 1.13 (1.03 to 1.25)     | 1.09 (1.04 to 1.15)              |
| 35       | 1.65 (1.40 to 1.94)        | 1.85 (1.49 to 2.30) | 1.63 (1.32 to 2.01)  | 1.44 (1.15 to 1.80)              | 1.29 (1.21 to 1.37)           | 1.41 (1.28 to 1.55)   | 1.26 (1.12 to 1.42)     | 1.24 (1.16 to 1.31)              |
| 37.5     | 2.02 (1.66 to 2.46)        | 2.39 (1.84 to 3.11) | 1.96 (1.52 to 2.53)  | 1.69 (1.29 to 2.22)              | 1.49 (1.37 to 1.61)           | 1.68 (1.49 to 1.89)   | 1.44 (1.24 to 1.66)     | 1.44 (1.34 to 1.55)              |
| 40       | 2.50 (1.98 to 3.15)        | 3.16 (2.32 to 4.30) | 2.38 (1.77 to 3.21)  | 2.03 (1.47 to 2.80)              | 1.74 (1.59 to 1.91)           | 2.03 (1.77 to 2.34)   | 1.66 (1.40 to 1.97)     | 1.72 (1.58 to 1.88)              |
| 42.5     | 3.16 (2.42 to 4.12)        | 4.26 (2.99 to 6.07) | 2.93 (2.09 to 4.12)  | 2.47 (1.70 to 3.59)              | 2.07 (1.86 to 2.30)           | 2.52 (2.15 to 2.95)   | 1.94 (1.59 to 2.35)     | 2.10 (1.90 to 2.32)              |
| 45       | 4.02 (2.98 to 5.43)        | 5.84 (3.92 to 8.71) | 3.66 (2.49 to 5.39)  | 3.05 (1.99 to 4.68)              | 2.49 (2.22 to 2.81)           | 3.16 (2.64 to 3.78)   | 2.29 (1.84 to 2.85)     | 2.62 (2.34 to 2.93)              |

<sup>1</sup> Lowest value was a BMI of 16.75

Table E: Body mass index and all cause mortality in never smokers, stratified by duration of follow-up, nonlinear dose-response

|          | All                 | <10 years           | 10-<15 years                     | 15-<20 years                     | 20-<25 years         | ≥25 years                        | ≥20 years           |
|----------|---------------------|---------------------|----------------------------------|----------------------------------|----------------------|----------------------------------|---------------------|
| <i>n</i> | 44                  | 9                   | 15                               | 4                                | 2                    | 8                                | 10                  |
| BMI      | RR (95% CI)         | RR (95% CI)         | RR (95% CI)                      | RR (95% CI)                      | RR (95% CI)          | RR (95% CI)                      | RR (95% CI)         |
| 15       | 2.01 (1.80 to 2.24) | 1.63 (1.32 to 2.01) |                                  |                                  |                      |                                  |                     |
| 16       | 1.66 (1.51 to 1.83) | 1.43 (1.21 to 1.70) | 1.92 (1.68 to 2.19) <sup>1</sup> | 1.73 (1.29 to 2.31) <sup>2</sup> | 1.22 (0.77 to 1.95)  | 1.10 (0.99 to 1.23) <sup>3</sup> | 1.16 (1.04 to 1.30) |
| 17.5     | 1.35 (1.25 to 1.45) | 1.24 (1.10 to 1.41) | 1.54 (1.38 to 1.71)              | 1.44 (1.16 to 1.81)              | 1.09 (0.76 to 1.58)  | 1.06 (0.96 to 1.16)              | 1.06 (0.97 to 1.16) |
| 20       | 1.10 (1.05 to 1.14) | 1.07 (1.00 to 1.14) | 1.15 (1.09 to 1.22)              | 1.04 (0.97 to 1.11)              | 1.00 (0.82 to 1.21)  | 0.99 (0.94 to 1.04)              | 0.99 (0.94 to 1.03) |
| 22       | 1.01 (1.00 to 1.03) | 1.01 (0.99 to 1.03) | 1.03 (1.01 to 1.05)              | 0.99 (0.97 to 1.00)              | 0.99 (0.93 to 1.05)  | 0.99 (0.97 to 1.00)              | 0.99 (0.97 to 1.00) |
| 23       | 1.00                | 1.00                | 1.00                             | 1.00                             | 1.00                 | 1.00                             | 1.00                |
| 24       | 1.00 (0.98 to 1.01) | 1.00 (0.98 to 1.02) | 0.99 (0.97 to 1.01)              | 1.03 (1.02 to 1.04)              | 1.02 (0.96 to 1.10)  | 1.02 (1.01 to 1.04)              | 1.02 (1.01 to 1.04) |
| 25       | 1.01 (0.98 to 1.03) | 1.01 (0.97 to 1.05) | 0.99 (0.95 to 1.03)              | 1.08 (1.07 to 1.09)              | 1.06 (0.92 to 1.21)  | 1.06 (1.02 to 1.09)              | 1.06 (1.02 to 1.09) |
| 27.5     | 1.07 (1.01 to 1.14) | 1.06 (0.98 to 1.15) | 1.04 (0.96 to 1.14)              | 1.26 (1.25 to 1.27)              | 1.17 (0.87 to 1.58)  | 1.17 (1.08 to 1.26)              | 1.17 (1.09 to 1.26) |
| 30       | 1.20 (1.09 to 1.32) | 1.16 (1.02 to 1.32) | 1.17 (1.02 to 1.34)              | 1.51 (1.50 to 1.52)              | 1.35 (0.86 to 2.13)  | 1.33 (1.18 to 1.50)              | 1.33 (1.19 to 1.49) |
| 32.5     | 1.39 (1.22 to 1.58) | 1.31 (1.10 to 1.56) | 1.37 (1.14 to 1.64)              | 1.84 (1.80 to 1.88)              | 1.60 (0.86 to 2.96)  | 1.55 (1.32 to 1.83)              | 1.55 (1.34 to 1.81) |
| 35       | 1.65 (1.40 to 1.94) | 1.52 (1.21 to 1.91) | 1.66 (1.32 to 2.09)              | 2.23 (2.16 to 2.32)              | 1.93 (0.89 to 4.20)  | 1.85 (1.51 to 2.26)              | 1.85 (1.53 to 2.23) |
| 37.5     | 2.02 (1.66 to 2.46) | 1.80 (1.36 to 2.38) | 2.07 (1.57 to 2.74)              | 2.71 (2.59 to 2.82)              | 2.37 (0.92 to 6.06)  | 2.23 (1.74 to 2.84)              | 2.23 (1.77 to 2.80) |
| 40       | 2.50 (1.98 to 3.15) | 2.17 (1.56 to 3.03) | 2.66 (1.92 to 3.68)              | 3.26 (3.12 to 3.41)              | 2.96 (0.98 to 8.94)  | 2.71 (2.03 to 3.62)              | 2.73 (2.08 to 3.57) |
| 42.5     | 3.16 (2.42 to 4.12) | 2.66 (1.80 to 3.93) | 3.45 (2.38 to 5.01)              | 3.89 (3.74 to 4.04)              | 3.72 (1.05 to 13.12) | 3.34 (2.40 to 4.64)              | 3.36 (2.47 to 4.58) |
| 45       | 4.02 (2.98 to 5.43) | 3.30 (2.10 to 5.18) | 4.58 (3.01 to 6.99)              | 4.60 (4.48 to 4.73)              | 4.73 (1.13 to 19.77) | 4.16 (2.86 to 6.05)              | 4.18 (2.95 to 5.92) |

<sup>1</sup> Lowest value was a BMI of 16.3

<sup>2</sup> Lowest value was a BMI of 16.7

<sup>3</sup> Lowest value was a BMI of 16.75

Because there was only one study with a duration  $<5$  years the categories  $<5$  and  $5-10$  years were collapsed and the same was done for the categories of  $20-25$  and  $\geq 25$  years of follow-up.  $n$ =number of risk estimates, the number of risk estimates does not add up to the total because some studies were excluded because the model did not converge, and one because the duration of follow-up was not reported.

Table F: Subgroup analyses of BMI and all cause mortality in all participants, per 5 units increase in BMI

|                                   | <b>BMI</b> |                     |                           |                                    |                                    |         |
|-----------------------------------|------------|---------------------|---------------------------|------------------------------------|------------------------------------|---------|
|                                   | <i>n</i>   | RR (95% CI)         | <i>I</i> <sup>2</sup> (%) | <i>P</i> <sub>h</sub> <sup>1</sup> | <i>P</i> <sub>h</sub> <sup>2</sup> |         |
| All studies                       | 198        | 1.05 (1.04 to 1.07) | 97.1                      | <0.0001                            |                                    |         |
| Sex                               |            |                     |                           |                                    |                                    |         |
| Men                               | 101        | 1.07 (1.05 to 1.09) | 93.0                      | <0.0001                            | 0.01/0.47                          |         |
| Women                             | 91         | 1.09 (1.08 to 1.11) | 92.2                      | <0.0001                            |                                    |         |
| Men and women                     | 76         | 1.00 (0.97 to 1.03) | 96.1                      | <0.0001                            |                                    |         |
| Assessment of weight/height       |            |                     |                           |                                    |                                    |         |
| Measured                          | 115        | 1.05 (1.03 to 1.07) | 96.4                      | <0.0001                            | 0.09                               |         |
| Self-reported                     | 60         | 1.08 (1.06 to 1.10) | 94.0                      | <0.0001                            |                                    |         |
| Measured and self-reported        | 4          | 1.07 (0.97 to 1.17) | 93.2                      | <0.0001                            |                                    |         |
| Unclear                           | 19         | 0.97 (0.90 to 1.05) | 95.3                      | <0.0001                            |                                    |         |
| Duration of follow-up             |            |                     |                           |                                    |                                    |         |
| <5 years follow-up                | 15         | 0.90 (0.83 to 0.97) | 90.1                      | <0.0001                            | <0.0001                            |         |
| 5-<10                             | 53         | 1.00 (0.96 to 1.04) | 97.2                      | <0.0001                            |                                    |         |
| 10-<15                            | 66         | 1.07 (1.05 to 1.08) | 91.8                      | <0.0001                            |                                    |         |
| 15-<20                            | 27         | 1.09 (1.05 to 1.13) | 87.9                      | <0.0001                            |                                    |         |
| 20-<25                            | 15         | 1.12 (1.08 to 1.17) | 91.7                      | <0.0001                            |                                    |         |
| ≥25                               | 22         | 1.15 (1.11 to 1.19) | 90.0                      | <0.0001                            |                                    |         |
| Geographic location               |            |                     |                           |                                    |                                    |         |
| Europe                            | 69         | 1.07 (1.04 to 1.09) | 97.2                      | <0.0001                            | 0.04                               |         |
| North America                     | 67         | 1.07 (1.05 to 1.10) | 98.1                      | <0.0001                            |                                    |         |
| South America                     | 3          | 0.92 (0.88 to 0.97) | 0                         | 0.55                               |                                    |         |
| Australia                         | 9          | 0.99 (0.91 to 1.07) | 74.9                      | <0.0001                            |                                    |         |
| Asia                              | 49         | 1.01 (0.97 to 1.05) | 92.6                      | <0.0001                            |                                    |         |
| Pacific                           | 1          | 0.88 (0.79 to 1.00) |                           |                                    |                                    |         |
| Number of cases                   |            |                     |                           |                                    |                                    |         |
| <500                              | 41         | 0.95 (0.90 to 1.01) | 74.3                      | <0.0001                            | <0.0001                            |         |
| 500-<1000                         | 39         | 1.04 (1.00 to 1.09) | 84.3                      | <0.0001                            |                                    |         |
| 1000-<5000                        | 74         | 1.05 (1.03 to 1.08) | 92.6                      | <0.0001                            |                                    |         |
| 5000-<10000                       | 16         | 1.08 (1.04 to 1.12) | 94.1                      | <0.0001                            |                                    |         |
| 10000-<20000                      | 15         | 1.13 (1.08 to 1.18) | 97.1                      | <0.0001                            |                                    |         |
| ≥20000                            | 10         | 1.11 (1.06 to 1.17) | 99.8                      | <0.0001                            |                                    |         |
| Study quality                     |            |                     |                           |                                    |                                    |         |
| 0-3                               | 0          |                     |                           |                                    | 0.03                               |         |
| 4-6                               | 66         | 1.02 (0.99 to 1.04) | 97.7                      | <0.0001                            |                                    |         |
| 7-9                               | 132        | 1.07 (1.06 to 1.09) | 94.1                      | <0.0001                            |                                    |         |
| <b>Adjustment for confounders</b> |            |                     |                           |                                    |                                    |         |
| Age                               | Yes        | 186                 | 1.06 (1.04 to 1.07)       | 96.2                               | <0.0001                            | 0.17    |
|                                   | No         | 12                  | 0.98 (0.88 to 1.09)       | 95.1                               | <0.0001                            |         |
| Education                         | Yes        | 74                  | 1.05 (1.03 to 1.06)       | 94.7                               | <0.0001                            | 0.51    |
|                                   | No         | 124                 | 1.06 (1.04 to 1.08)       | 97.6                               | <0.0001                            |         |
| Socio-economic status             | Yes        | 14                  | 1.05 (0.95 to 1.16)       | 96.4                               | <0.0001                            | 0.99    |
|                                   | No         | 184                 | 1.06 (1.04 to 1.07)       | 96.2                               | <0.0001                            |         |
| Alcohol                           | Yes        | 78                  | 1.05 (1.03 to 1.07)       | 94.7                               | <0.0001                            | 0.95    |
|                                   | No         | 120                 | 1.05 (1.03 to 1.07)       | 97.7                               | <0.0001                            |         |
| Smoking status                    | Yes        | 150                 | 1.06 (1.05 to 1.08)       | 93.5                               | <0.0001                            | 0.40    |
|                                   | No         | 47                  | 1.03 (1.00 to 1.06)       | 98.9                               | <0.0001                            |         |
| Cigarettes per day                | Yes        | 30                  | 1.16 (1.13 to 1.19)       | 91.9                               | <0.0001                            | <0.0001 |
|                                   | No         | 168                 | 1.03 (1.02 to 1.05)       | 97.2                               | <0.0001                            |         |
| Pack-years                        | Yes        | 17                  | 1.07 (1.04 to 1.11)       | 95.4                               | <0.0001                            | 0.78    |
|                                   | No         | 181                 | 1.05 (1.04 to 1.07)       | 97.2                               | <0.0001                            |         |
| Years since quitting              | Yes        | 4                   | 1.17 (1.15 to 1.18)       | 77.4                               | 0.004                              | 0.15    |

|                                                                                                                                               |          |     |                     |                     |         |         |      |
|-----------------------------------------------------------------------------------------------------------------------------------------------|----------|-----|---------------------|---------------------|---------|---------|------|
|                                                                                                                                               | No       | 194 | 1.05 (1.03 to 1.06) | 96.9                | <0.0001 |         |      |
| Physical activity                                                                                                                             | Yes      | 63  | 1.06 (1.04 to 1.08) | 93.5                | <0.0001 | 0.82    |      |
|                                                                                                                                               | No       | 135 | 1.05 (1.03 to 1.07) | 97.6                | <0.0001 |         |      |
| Height                                                                                                                                        | Yes      | 5   | 1.10 (0.99 to 1.22) | 97.8                | <0.0001 | 0.48    |      |
|                                                                                                                                               | No       | 193 | 1.05 (1.04 to 1.07) | 96.6                | <0.0001 |         |      |
| Waist circumference or waist-to-hip ratio                                                                                                     | Yes      | 2   | 0.87 (0.83 to 0.91) | 0                   | 0.82    | 0.10    |      |
|                                                                                                                                               | No       | 196 | 1.05 (1.04 to 1.07) | 97.1                | <0.0001 |         |      |
| Dietary pattern                                                                                                                               | Yes      | 4   | 1.12 (1.07 to 1.16) | 48.1                | 0.12    | 0.38    |      |
|                                                                                                                                               | No       | 194 | 1.05 (1.04 to 1.07) | 97.2                | <0.0001 |         |      |
| Fat intake                                                                                                                                    | Yes      | 3   | 1.12 (1.06 to 1.18) | 86.6                | 0.001   | 0.69    |      |
|                                                                                                                                               | No       | 195 | 1.05 (1.04 to 1.07) | 97.0                | <0.0001 |         |      |
| Fruit, vegetables                                                                                                                             | Yes      | 4   | 1.10 (0.95 to 1.28) | 96.4                | <0.0001 | 0.49    |      |
|                                                                                                                                               | No       | 194 | 1.05 (1.04 to 1.07) | 97.0                | <0.0001 |         |      |
| Adjustment for potential intermediates                                                                                                        |          |     |                     |                     |         |         |      |
| Diabetes                                                                                                                                      | Yes      | 27  | 0.97 (0.93 to 1.02) | 85.5                | <0.0001 | 0.006   |      |
|                                                                                                                                               | No       | 171 | 1.06 (1.05 to 1.08) | 97.4                | <0.0001 |         |      |
| Systolic blood pressure                                                                                                                       | Yes      | 12  | 1.01 (0.95 to 1.07) | 92.3                | <0.0001 | 0.28    |      |
|                                                                                                                                               | No       | 186 | 1.06 (1.04 to 1.07) | 97.2                | <0.0001 |         |      |
| Diastolic blood pressure                                                                                                                      | Yes      | 4   | 1.08 (0.99 to 1.17) | 84.1                | <0.0001 | 0.67    |      |
|                                                                                                                                               | No       | 194 | 1.05 (1.04 to 1.07) | 97.2                | <0.0001 |         |      |
| Hypertension                                                                                                                                  | Yes      | 20  | 1.01 (0.94 to 1.08) | 95.6                | <0.0001 | 0.23    |      |
|                                                                                                                                               | No       | 178 | 1.06 (1.05 to 1.07) | 96.2                | <0.0001 |         |      |
| Triglycerides                                                                                                                                 | Yes      | 3   | 1.12 (1.09 to 1.16) | 0                   | 0.87    | 0.49    |      |
|                                                                                                                                               | No       | 195 | 1.05 (1.04 to 1.07) | 97.2                | <0.0001 |         |      |
| Serum cholesterol                                                                                                                             | Yes      | 14  | 1.04 (0.99 to 1.09) | 82.8                | <0.0001 | 0.61    |      |
|                                                                                                                                               | No       | 184 | 1.05 (1.04 to 1.07) | 97.3                | <0.0001 |         |      |
| Adjustment for medical history                                                                                                                |          |     |                     |                     |         |         |      |
| Prevalent coronary heart disease                                                                                                              | Yes      | 26  | 0.96 (0.90 to 1.02) | 99.0                | <0.0001 | 0.003   |      |
|                                                                                                                                               | No       | 172 | 1.07 (1.05 to 1.08) | 96.0                | <0.0001 |         |      |
| Prevalent stroke                                                                                                                              | Yes      | 22  | 0.99 (0.92 to 1.06) | 98.6                | <0.0001 | 0.07    |      |
|                                                                                                                                               | No       | 176 | 1.06 (1.05 to 1.08) | 96.2                | <0.0001 |         |      |
| Prevalent cancer                                                                                                                              | Yes      | 19  | 0.98 (0.91 to 1.04) | 99.3                | <0.0001 | 0.03    |      |
|                                                                                                                                               | No       | 179 | 1.06 (1.05 to 1.08) | 95.9                | <0.0001 |         |      |
| Family history of coronary heart disease                                                                                                      | Yes      | 3   | 1.16 (1.04 to 1.30) | 83.9                | 0.001   | 0.26    |      |
|                                                                                                                                               | No       | 195 | 1.05 (1.04 to 1.07) | 97.1                | <0.0001 |         |      |
| Studies with adjustment for age, smoking, alcohol, and physical activity and without adjustment for prevalent disease or intermediate factors |          |     |                     |                     |         |         |      |
| Adjustment for main confounders, but not for intermediates                                                                                    | Yes      | 25  | 1.09 (1.04 to 1.14) | 94.8                | <0.0001 | 0.16    |      |
|                                                                                                                                               | No       | 173 | 1.05 (1.03 to 1.06) | 97.1                | <0.0001 |         |      |
| Studies with adjustment for main confounders, but not intermediates, stratified by duration of follow-up                                      | <5 years | Yes | 2                   | 0.83 (0.70 to 0.98) | 92.5    | <0.0001 | 0.40 |
|                                                                                                                                               |          | No  | 13                  | 0.92 (0.84 to 1.00) | 87.2    | <0.0001 |      |
|                                                                                                                                               | 5-<10    | Yes | 5                   | 1.16 (1.03 to 1.29) | 81.7    | <0.0001 | 0.19 |
|                                                                                                                                               |          | No  | 48                  | 0.99 (0.95 to 1.02) | 97.1    | <0.0001 |      |
|                                                                                                                                               | 10-<15   | Yes | 12                  | 1.11 (1.06 to 1.16) | 87.4    | <0.0001 | 0.08 |
|                                                                                                                                               |          | No  | 54                  | 1.06 (1.03 to 1.08) | 92.3    | <0.0001 |      |
|                                                                                                                                               | 15-<20   | Yes | 3                   | 1.03 (0.90 to 1.18) | 88.0    | <0.0001 | 0.34 |
|                                                                                                                                               |          | No  | 24                  | 1.10 (1.06 to 1.14) | 87.2    | <0.0001 |      |
|                                                                                                                                               | ≥20      | Yes | 3                   | 1.22 (1.11 to 1.35) | 74.4    | 0.02    | 0.38 |
|                                                                                                                                               |          | No  | 33                  | 1.13 (1.10 to 1.16) | 90.4    | <0.0001 |      |

$n$ =number of risk estimates, the number of risk estimates does not always add up to the total because of missing information in some studies

RR=relative risk, CI=confidence interval

$P_h^1$ =p for heterogeneity within each subgroup

$P_h^2$ =p for heterogeneity between subgroups using meta-regression analyses



Table G: Body mass index and all cause mortality in all participants, stratified by duration of follow-up, nonlinear dose-response

|          | All                 | <5 years                         | 5-<10 years                      | 10-<15 years                     | 15-<20 years                     | 20-<25 years                     | ≥25 years           |
|----------|---------------------|----------------------------------|----------------------------------|----------------------------------|----------------------------------|----------------------------------|---------------------|
| <i>n</i> | 198                 | 12                               | 41                               | 66                               | 28                               | 15                               | 23                  |
| BMI      | RR (95% CI)         | RR (95% CI)                      | RR (95% CI)                      | RR (95% CI)                      | RR (95% CI)                      | RR (95% CI)                      | RR (95% CI)         |
| 15       | 2.24 (2.15 to 2.34) |                                  | 2.20 (2.10 to 2.30) <sup>2</sup> | 2.37 (2.54 to 2.21) <sup>2</sup> |                                  | 1.87 (1.84 to 1.91) <sup>2</sup> |                     |
| 16       | 1.83 (1.77 to 1.91) | 2.18 (2.03 to 2.34) <sup>1</sup> | 1.99 (1.91 to 2.08)              | 2.10 (1.97 to 2.24)              | 1.60 (1.41 to 1.82) <sup>3</sup> | 1.69 (1.67 to 1.73)              | 1.49 (1.35 to 1.63) |
| 17.5     | 1.47 (1.43 to 1.51) | 1.72 (1.64 to 1.80)              | 1.57 (1.52 to 1.62)              | 1.60 (1.52 to 1.68)              | 1.44 (1.29 to 1.60)              | 1.35 (1.34 to 1.37)              | 1.28 (1.18 to 1.38) |
| 20       | 1.15 (1.13 to 1.17) | 1.25 (1.22 to 1.27)              | 1.19 (1.17 to 1.21)              | 1.18 (1.15 to 1.22)              | 1.15 (1.09 to 1.22)              | 1.09 (1.08 to 1.09)              | 1.08 (1.03 to 1.12) |
| 22       | 1.03 (1.02 to 1.04) | 1.06 (1.05 to 1.06)              | 1.04 (1.03 to 1.05)              | 1.04 (1.03 to 1.05)              | 1.03 (1.01 to 1.05)              | 1.01 (1.01 to 1.01)              | 1.01 (1.00 to 1.03) |
| 23       | 1.00                | 1.00                             | 1.00                             | 1.00                             | 1.00                             | 1.00                             | 1.00                |
| 24       | 0.98 (0.97 to 0.99) | 0.96 (0.95 to 0.96)              | 0.97 (0.96 to 0.97)              | 0.97 (0.96 to 0.98)              | 0.98 (0.96 to 1.00)              | 1.00 (0.99 to 1.00)              | 1.00 (0.98 to 1.01) |
| 25       | 0.97 (0.96 to 0.98) | 0.93 (0.92 to 0.93)              | 0.95 (0.93 to 0.96)              | 0.96 (0.95 to 0.98)              | 0.97 (0.93 to 1.01)              | 1.01 (1.00 to 1.01)              | 1.01 (0.98 to 1.04) |
| 27.5     | 0.98 (0.96 to 1.01) | 0.89 (0.88 to 0.90)              | 0.93 (0.91 to 0.95)              | 0.98 (0.94 to 1.02)              | 1.00 (0.92 to 1.08)              | 1.08 (1.07 to 1.08)              | 1.06 (1.00 to 1.13) |
| 30       | 1.04 (1.00 to 1.08) | 0.90 (0.89 to 0.92)              | 0.96 (0.92 to 1.00)              | 1.06 (0.99 to 1.13)              | 1.08 (0.95 to 1.23)              | 1.19 (1.18 to 1.20)              | 1.17 (1.06 to 1.29) |
| 32.5     | 1.14 (1.09 to 1.20) | 0.96 (0.94 to 0.98)              | 1.01 (0.96 to 1.07)              | 1.19 (1.09 to 1.30)              | 1.25 (1.05 to 1.49)              | 1.35 (1.34 to 1.36)              | 1.32 (1.16 to 1.50) |
| 35       | 1.29 (1.21 to 1.37) | 1.06 (1.02 to 1.10)              | 1.11 (1.03 to 1.19)              | 1.39 (1.24 to 1.55)              | 1.50 (1.20 to 1.88)              | 1.55 (1.53 to 1.57)              | 1.53 (1.30 to 1.80) |
| 37.5     | 1.49 (1.37 to 1.61) | 1.21 (1.13 to 1.29)              | 1.24 (1.14 to 1.35)              | 1.65 (1.45 to 1.89)              | 1.89 (1.44 to 2.49)              | 1.81 (1.79 to 1.83)              | 1.81 (1.48 to 2.20) |
| 40       | 1.74 (1.59 to 1.91) | 1.44 (1.30 to 1.59)              | 1.40 (1.27 to 1.55)              | 2.02 (1.73 to 2.36)              | 2.47 (1.79 to 3.40)              | 2.13 (2.10 to 2.16)              | 2.16 (1.71 to 2.72) |
| 42.5     | 2.07 (1.86 to 2.30) | 1.76 (1.52 to 2.05)              | 1.62 (1.44 to 1.81)              | 2.52 (2.11 to 3.01)              | 3.35 (2.31 to 4.85)              | 2.51 (2.47 to 2.55)              | 2.62 (2.01 to 3.42) |
| 45       | 2.49 (2.22 to 2.81) | 2.25 (1.83 to 2.76)              | 1.88 (1.65 to 2.14)              | 3.18 (2.60 to 3.90)              | 4.67 (3.06 to 7.11)              | 2.96 (2.90 to 3.01)              | 3.21 (2.38 to 4.34) |

<sup>1</sup> Lowest value was a BMI of 16.2

<sup>2</sup> Lowest value was a BMI of 15.5

<sup>3</sup> Lowest value was a BMI of 16.6

*n*=number of risk estimates, the number of risk estimates does not add up to the total because some studies had to be excluded for the model to converge.

Table H: Body mass index and all cause mortality in never smokers, stratified by geographic location

|          | All                 | Europe              | North America                    | Australia            | Asia                |
|----------|---------------------|---------------------|----------------------------------|----------------------|---------------------|
| <i>n</i> | 44                  | 6                   | 20                               | 2                    | 11                  |
| BMI      | RR (95% CI)         | RR (95% CI)         | RR (95% CI)                      | RR (95% CI)          | RR (95% CI)         |
| 15       | 2.01 (1.80 to 2.24) | -                   | -                                | -                    | 2.26 (1.86 to 2.74) |
| 16       | 1.66 (1.51 to 1.83) | 1.66 (1.39 to 1.98) | 1.23 (1.13 to 1.34) <sup>1</sup> | -                    | 1.88 (1.59 to 2.23) |
| 17.5     | 1.35 (1.25 to 1.45) | 1.35 (1.18 to 1.53) | 1.16 (1.08 to 1.26)              | -                    | 1.51 (1.32 to 1.72) |
| 20       | 1.10 (1.05 to 1.14) | 1.09 (1.03 to 1.17) | 1.03 (0.99 to 1.07)              | -                    | 1.16 (1.08 to 1.25) |
| 22       | 1.01 (1.00 to 1.03) | 1.01 (0.99 to 1.03) | 1.00 (0.99 to 1.01)              | 1.05 (0.97 to 1.12)  | 1.03 (1.01 to 1.06) |
| 23       | 1.00                | 1.00                | 1.00                             | 1.00                 | 1.00                |
| 24       | 1.00 (0.98 to 1.01) | 1.00 (0.98 to 1.02) | 1.01 (1.00 to 1.02)              | 0.96 (0.90 to 1.03)  | 0.98 (0.96 to 1.01) |
| 25       | 1.01 (0.98 to 1.03) | 1.01 (0.97 to 1.05) | 1.03 (1.00 to 1.05)              | 0.94 (0.85 to 1.06)  | 0.99 (0.94 to 1.03) |
| 27.5     | 1.07 (1.01 to 1.14) | 1.08 (1.00 to 1.18) | 1.10 (1.04 to 1.17)              | 0.95 (0.80 to 1.13)  | 1.06 (0.95 to 1.18) |
| 30       | 1.20 (1.09 to 1.32) | 1.22 (1.07 to 1.38) | 1.22 (1.11 to 1.34)              | 1.07 (0.91 to 1.27)  | 1.24 (1.04 to 1.46) |
| 32.5     | 1.39 (1.22 to 1.58) | 1.42 (1.20 to 1.68) | 1.39 (1.22 to 1.57)              | 1.36 (1.07 to 1.73)  | 1.57 (1.25 to 1.98) |
| 35       | 1.65 (1.40 to 1.94) | 1.71 (1.38 to 2.12) | 1.61 (1.37 to 1.89)              | 1.99 (1.13 to 3.49)  | 2.16 (1.62 to 2.88) |
| 37.5     | 2.02 (1.66 to 2.46) | 2.11 (1.62 to 2.74) | 1.90 (1.56 to 2.30)              | 3.41 (1.12 to 10.40) | 3.18 (2.24 to 4.50) |
| 40       | 2.50 (1.98 to 3.15) | 2.63 (1.93 to 3.59) | 2.27 (1.81 to 2.85)              | -                    | 4.99 (3.31 to 7.53) |
| 42.5     | 3.16 (2.42 to 4.12) | 3.36 (2.34 to 4.82) | 2.73 (2.10 to 3.55)              | -                    | -                   |
| 45       | 4.02 (2.98 to 5.43) | 4.34 (2.87 to 6.57) | 3.33 (2.48 to 4.48)              | -                    | -                   |

<sup>1</sup> Lowest value was a BMI of 16.75

*n*=number of risk estimates, the number of risk estimates does not add up to the total because some studies had to be excluded for the model to converge.

Table I: Body mass index and all cause mortality, all participants and never smokers, stratified by study quality, nonlinear dose-response

|          | All participants,<br>all studies | All participants,<br>study quality=4-6 | All participants,<br>study quality=7-9 | Never smokers,<br>all studies | Never smokers,<br>study quality=4-6 | Never smokers,<br>study quality=7-9 |
|----------|----------------------------------|----------------------------------------|----------------------------------------|-------------------------------|-------------------------------------|-------------------------------------|
| <i>n</i> | 198                              | 63                                     | 128                                    | 44                            | 13                                  | 31                                  |
| BMI      | RR (95% CI)                      | RR (95% CI)                            | RR (95% CI)                            | RR (95% CI)                   | RR (95% CI)                         | RR (95% CI)                         |
| 15       | 2.24 (2.15-2.34)                 | 2.10 (2.00-2.20) <sup>1</sup>          | 2.17 (2.05-2.29)                       | 2.01 (1.80-2.24)              |                                     | 2.03 (1.77-2.33)                    |
| 16       | 1.83 (1.77-1.91)                 | 1.91 (1.82-1.99)                       | 1.78 (1.70-1.87)                       | 1.66 (1.51-1.83)              | 1.50 (1.30-1.73) <sup>2</sup>       | 1.68 (1.49-1.89)                    |
| 17.5     | 1.47 (1.43-1.51)                 | 1.53 (1.48-1.59)                       | 1.44 (1.38-1.49)                       | 1.35 (1.25-1.45)              | 1.36 (1.20-1.54)                    | 1.36 (1.24-1.49)                    |
| 20       | 1.15 (1.13-1.17)                 | 1.19 (1.17-1.21)                       | 1.14 (1.11-1.16)                       | 1.10 (1.05-1.14)              | 1.09 (1.03-1.17)                    | 1.10 (1.05-1.16)                    |
| 22       | 1.03 (1.02-1.04)                 | 1.04 (1.03-1.05)                       | 1.03 (1.02-1.04)                       | 1.01 (1.00-1.03)              | 1.01 (0.99-1.03)                    | 1.02 (1.00-1.03)                    |
| 23       | 1.00                             | 1.00                                   | 1.00                                   | 1.00                          | 1.00                                | 1.00                                |
| 24       | 0.98 (0.97-0.99)                 | 0.96 (0.95-0.97)                       | 0.98 (0.97-0.99)                       | 1.00 (0.98-1.01)              | 1.00 (0.98-1.02)                    | 1.00 (0.98-1.01)                    |
| 25       | 0.97 (0.96-0.98)                 | 0.94 (0.93-0.96)                       | 0.98 (0.96-0.99)                       | 1.01 (0.98-1.03)              | 1.01 (0.97-1.06)                    | 1.00 (0.97-1.04)                    |
| 27.5     | 0.98 (0.96-1.01)                 | 0.93 (0.90-0.96)                       | 1.00 (0.97-1.03)                       | 1.07 (1.01-1.14)              | 1.09 (0.99-1.20)                    | 1.06 (0.99-1.15)                    |
| 30       | 1.04 (1.00-1.08)                 | 0.96 (0.92-1.01)                       | 1.07 (1.02-1.12)                       | 1.20 (1.09-1.32)              | 1.24 (1.07-1.44)                    | 1.18 (1.05-1.33)                    |
| 32.5     | 1.14 (1.09-1.20)                 | 1.03 (0.97-1.09)                       | 1.19 (1.11-1.27)                       | 1.39 (1.22-1.58)              | 1.46 (1.19-1.79)                    | 1.36 (1.16-1.60)                    |
| 35       | 1.29 (1.21-1.37)                 | 1.14 (1.06-1.23)                       | 1.35 (1.24-1.47)                       | 1.65 (1.40-1.94)              | 1.78 (1.37-2.30)                    | 1.61 (1.32-1.97)                    |
| 37.5     | 1.49 (1.37-1.61)                 | 1.29 (1.18-1.42)                       | 1.57 (1.42-1.74)                       | 2.02 (1.66-2.46)              | 2.21 (1.62-3.02)                    | 1.95 (1.53-2.48)                    |
| 40       | 1.74 (1.59-1.91)                 | 1.50 (1.34-1.67)                       | 1.86 (1.65-2.09)                       | 2.50 (1.98-3.15)              | 2.82 (1.96-4.05)                    | 2.41 (1.81-3.20)                    |
| 42.5     | 2.07 (1.86-2.30)                 | 1.77 (1.56-2.00)                       | 2.23 (1.95-2.55)                       | 3.16 (2.42-4.12)              | 3.63 (2.38-5.52)                    | 3.02 (2.18-4.20)                    |
| 45       | 2.49 (2.22-2.81)                 | 2.13 (1.85-2.45)                       | 2.71 (2.33-3.16)                       | 4.02 (2.98-5.43)              | 4.78 (2.96-7.69)                    | 3.83 (2.64-5.54)                    |

<sup>1</sup>Lowest value was a BMI of 15.5

<sup>2</sup> Lowest value was a BMI of 16.75

*n*=number of risk estimates, the number of studies included does not always add up to the total because some studies had to be excluded for the nonlinear model to converge.

Table J: Body mass index and all cause mortality, never smokers, stratified by age, nonlinear dose-response

|          | Never smokers,<br>all studies | Never smokers,<br>age <65 years | Never smokers, age<br>≥65 years |
|----------|-------------------------------|---------------------------------|---------------------------------|
| <i>n</i> | 44                            | 13                              | 6                               |
| BMI      | RR (95% CI)                   | RR (95% CI)                     | RR (95% CI)                     |
| 15       | 2.01 (1.80-2.24)              |                                 |                                 |
| 16       | 1.66 (1.51-1.83)              | 2.00 (1.92-2.09) <sup>1</sup>   | 1.73 (1.44-2.08) <sup>1</sup>   |
| 17.5     | 1.35 (1.25-1.45)              | 1.54 (1.49-1.59)                | 1.46 (1.26-1.69)                |
| 20       | 1.10 (1.05-1.14)              | 1.13 (1.11-1.15)                | 1.16 (1.07-1.25)                |
| 22       | 1.01 (1.00-1.03)              | 1.02 (1.01-1.03)                | 1.04 (1.01-1.07)                |
| 23       | 1.00                          | 1.00                            | 1.00                            |
| 24       | 1.00 (0.98-1.01)              | 1.00 (0.99-1.01)                | 0.97 (0.95-1.00)                |
| 25       | 1.01 (0.98-1.03)              | 1.02 (1.01-1.03)                | 0.96 (0.91-1.01)                |
| 27.5     | 1.07 (1.01-1.14)              | 1.12 (1.11-1.14)                | 0.95 (0.85-1.08)                |
| 30       | 1.20 (1.09-1.32)              | 1.32 (1.29-1.36)                | 0.99 (0.82-1.19)                |
| 32.5     | 1.39 (1.22-1.58)              | 1.63 (1.57-1.69)                | 1.05 (0.82-1.36)                |
| 35       | 1.65 (1.40-1.94)              | 2.08 (1.99-2.17)                | 1.15 (0.83-1.59)                |
| 37.5     | 2.02 (1.66-2.46)              | 2.71 (2.57-2.86)                | 1.28 (0.87-1.90)                |
| 40       | 2.50 (1.98-3.15)              | 3.60 (3.38-3.83)                | 1.45 (0.92-2.29)                |
| 42.5     | 3.16 (2.42-4.12)              | 4.83 (4.50-5.19)                | 1.66 (0.98-2.81)                |
| 45       | 4.02 (2.98-5.43)              | 6.56 (6.05-7.11)                | 1.92 (1.06-3.48)                |

<sup>1</sup>Lowest value was a BMI of 16.25

$n$ =number of risk estimates, the number of risk estimates does not add up to the total because not all studies reported results stratified by age

Table K. Influence analysis of BMI and all cause mortality among never smokers

| Study omitted                 | Estimate  | [95% Conf. Interval] |           |
|-------------------------------|-----------|----------------------|-----------|
| Rissanen, 1989                | 1.1801792 | 1.1488022            | 1.2124132 |
| Rissanen, 1991                | 1.1760972 | 1.1449667            | 1.2080739 |
| Lee, 1993                     | 1.1756554 | 1.1446522            | 1.2074983 |
| Lindsted, 1997                | 1.1783594 | 1.1468321            | 1.2107533 |
| Lindsted, 1998                | 1.1773396 | 1.1461253            | 1.2094041 |
| Yuan, 1998                    | 1.1771479 | 1.1461149            | 1.2090211 |
| Singh, 1999                   | 1.1728579 | 1.1418855            | 1.2046703 |
| Allison, 1999, CPS1           | 1.1775452 | 1.1427189            | 1.2134328 |
| Visscher, 2000                | 1.1786907 | 1.1473466            | 1.2108909 |
| Visscher, 2001                | 1.1821303 | 1.1510041            | 1.2140983 |
| Tsugane, 2002                 | 1.177052  | 1.1459383            | 1.2090106 |
| Miyazaki, 2002                | 1.1774776 | 1.1465021            | 1.2092899 |
| Engeland, 2003                | 1.1765411 | 1.1448325            | 1.2091278 |
| Hu, 2004                      | 1.1730058 | 1.1421667            | 1.2046776 |
| Adams, 2006                   | 1.1753507 | 1.1438026            | 1.2077689 |
| Freedman, 2006                | 1.1772259 | 1.1458265            | 1.2094859 |
| Lawlor, 2006, Renfrew-Paisley | 1.1764736 | 1.1449702            | 1.2088438 |
| Lawlor, 2006, Collaborative   | 1.1766042 | 1.1454438            | 1.2086122 |
| Jee, 2006                     | 1.1802418 | 1.1485417            | 1.2128168 |
| Gelber, 2007                  | 1.1781315 | 1.1468171            | 1.2103009 |
| Mazza, 2007                   | 1.1840056 | 1.1528548            | 1.2159982 |
| Flegal, 2007                  | 1.1821638 | 1.1507456            | 1.2144399 |
| Simpson, 2007                 | 1.179721  | 1.1483896            | 1.2119073 |
| Dolan, 2007                   | 1.1807076 | 1.1493915            | 1.2128769 |
| Pischon, 2008                 | 1.1751304 | 1.1437678            | 1.2073529 |
| Hozawa, 2008                  | 1.176594  | 1.1456565            | 1.208367  |
| Kivimaki, 2008                | 1.1744596 | 1.1432441            | 1.2065275 |
| Pednekar, 2008                | 1.1941104 | 1.1681112            | 1.2206882 |
| Zhang, 2008                   | 1.1755044 | 1.1444472            | 1.2074046 |
| Tsai, 2008                    | 1.1749504 | 1.1437142            | 1.2070396 |
| Moore, 2008                   | 1.1766896 | 1.1451812            | 1.2090648 |
| Sauvaget, 2008                | 1.1859139 | 1.1548196            | 1.2178454 |
| Orpana, 2010                  | 1.1822603 | 1.1509815            | 1.214389  |
| Odegaard, 2010                | 1.1791822 | 1.1476296            | 1.2116023 |
| Bessonova, 2011               | 1.1804385 | 1.1488141            | 1.2129333 |
| Boggs, 2011                   | 1.1784773 | 1.1469526            | 1.2108684 |
| Hotchkiss, 2011               | 1.1826183 | 1.1513882            | 1.2146953 |
| Park, 2012                    | 1.174419  | 1.143186             | 1.2065055 |
| Ma, 2013                      | 1.180945  | 1.1492094            | 1.213557  |
| Singh, 2013                   | 1.1784825 | 1.1471149            | 1.210708  |
| Joshya, 2014                  | 1.1776602 | 1.146153             | 1.2100335 |
| Patel, 2014                   | 1.1790823 | 1.1415523            | 1.217846  |
| Yi, 2015                      | 1.180904  | 1.1490226            | 1.2136701 |
| Cao, 2015                     | 1.1800684 | 1.1484958            | 1.2125089 |
| Combined                      | 1.1785422 | 1.1475681            | 1.2103523 |

Table L. Influence analysis of BMI and all cause mortality among all participants

| Study omitted                                 | Estimate  | [95% Conf. Interval] |           |
|-----------------------------------------------|-----------|----------------------|-----------|
| Multiple Risk Factor Intervention Trial, 1986 | 1.0518801 | 1.0373954            | 1.0665672 |
| Johansen, 1987                                | 1.0523934 | 1.0378823            | 1.0671073 |
| Rissanen, 1989                                | 1.0522426 | 1.0377041            | 1.0669849 |
| Rissanen, 1991                                | 1.0513349 | 1.0368488            | 1.0660235 |
| Ho, 1991                                      | 1.0527363 | 1.0382656            | 1.0674088 |
| Lee, 1993                                     | 1.051461  | 1.0369658            | 1.0661589 |
| Kornitzer, 1993                               | 1.052516  | 1.0380242            | 1.06721   |
| Sorkin, 1994                                  | 1.0515583 | 1.0370653            | 1.0662539 |
| Norrish, 1995                                 | 1.0518863 | 1.0374252            | 1.0665489 |
| Hanson, 1995                                  | 1.0513637 | 1.0368962            | 1.066033  |
| Seidell, 1996                                 | 1.0520784 | 1.0375745            | 1.0667849 |
| Hodge, 1996                                   | 1.05308   | 1.0385827            | 1.0677797 |
| Chyou, 1997                                   | 1.0507386 | 1.0362805            | 1.0653985 |
| Maskarinec, 1998                              | 1.0513431 | 1.0368328            | 1.0660565 |
| Yuan, 1998                                    | 1.0522366 | 1.0377532            | 1.0669221 |
| Seccareccia, 1998                             | 1.0529143 | 1.0384259            | 1.0676048 |
| Rosengren, 1999                               | 1.0511266 | 1.0366404            | 1.0658152 |
| Allison, 1999, CPS1                           | 1.0510976 | 1.0366157            | 1.0657817 |
| Allison, 1999, FHSI                           | 1.0506448 | 1.0361809            | 1.0653105 |
| Allison, 1999, TCHSI                          | 1.0513002 | 1.0368181            | 1.0659845 |
| Ostbye, 1999                                  | 1.0536469 | 1.0391736            | 1.0683218 |
| Andersen, 2000                                | 1.0517125 | 1.0371847            | 1.0664438 |
| Baik, 2000                                    | 1.0511166 | 1.0366368            | 1.0657986 |
| Folsom, 2000                                  | 1.0532054 | 1.0387195            | 1.0678933 |
| Fortes, 2000                                  | 1.0527692 | 1.038288             | 1.0674524 |
| Haapanen-Niemi, 2000                          | 1.0522742 | 1.037787             | 1.0669638 |
| Hara, 2000                                    | 1.0523965 | 1.0379308            | 1.0670638 |
| Strawbridge, 2000                             | 1.0529985 | 1.0384966            | 1.067703  |
| Grabowski, 2001                               | 1.0540669 | 1.039625             | 1.0687094 |
| Katzmarzyk, 2001                              | 1.0517206 | 1.037227             | 1.0664167 |
| Niverthi, 2001                                | 1.0516554 | 1.0371573            | 1.0663561 |
| Dey, 2001                                     | 1.0516729 | 1.0371978            | 1.06635   |
| Wannamethee, 2001                             | 1.0522776 | 1.0377772            | 1.0669805 |
| Osler, 2001                                   | 1.0519544 | 1.0374618            | 1.0666496 |
| Barbagallo, 2001                              | 1.0519493 | 1.0374916            | 1.0666084 |
| Farrell, 2002                                 | 1.0523038 | 1.0378219            | 1.0669878 |
| Stevens, 2002                                 | 1.0521407 | 1.0376415            | 1.0668424 |
| Tsugane, 2002                                 | 1.0510149 | 1.0365474            | 1.0656843 |
| Miyazaki, 2002                                | 1.0518377 | 1.0373714            | 1.0665057 |
| Miller, 2002                                  | 1.0522125 | 1.0377189            | 1.0669085 |
| Wang, 2002                                    | 1.0526546 | 1.0381947            | 1.0673159 |
| Somes, 2002                                   | 1.052128  | 1.0376563            | 1.0668015 |
| Engeland, 2003                                | 1.0508018 | 1.0356785            | 1.0661458 |
| Lubin, 2003                                   | 1.0524812 | 1.0379992            | 1.0671651 |
| Thorogood, 2003                               | 1.0516467 | 1.0371612            | 1.0663345 |
| Hosegood, 2003                                | 1.0523453 | 1.0378808            | 1.0670114 |
| Kuriyama, 2004                                | 1.0520171 | 1.0375296            | 1.0667069 |
| Stevens, 2004                                 | 1.0524694 | 1.03799              | 1.0671507 |
| Sundquist, 2004                               | 1.0526925 | 1.0381866            | 1.0674012 |



|                                     |  |           |           |           |
|-------------------------------------|--|-----------|-----------|-----------|
| Maru, 2004                          |  | 1.0511444 | 1.0366583 | 1.0658327 |
| Hu, 2004                            |  | 1.0509914 | 1.0365392 | 1.0656451 |
| Hu, 2005                            |  | 1.0522054 | 1.0376759 | 1.0669385 |
| Nyholm, 2005                        |  | 1.0529865 | 1.0385003 | 1.0676746 |
| Pajak, 2005                         |  | 1.051806  | 1.0373032 | 1.0665116 |
| Iribarren, 2005                     |  | 1.0529237 | 1.0384411 | 1.0676082 |
| Jain, 2005                          |  | 1.0516325 | 1.036911  | 1.0665629 |
| Hayashi, 2005                       |  | 1.0514543 | 1.0369974 | 1.0661128 |
| Hjartåker, 2005                     |  | 1.0513479 | 1.0368574 | 1.0660408 |
| Chang-Claude, 2005                  |  | 1.0524288 | 1.0379436 | 1.0671163 |
| Gu, 2006                            |  | 1.0512131 | 1.0367218 | 1.0659071 |
| Adams, 2006                         |  | 1.0512717 | 1.0366213 | 1.0661292 |
| Tsai, 2006                          |  | 1.0514542 | 1.03695   | 1.0661613 |
| van Dam, 2006                       |  | 1.0511907 | 1.0367008 | 1.065883  |
| Jee, 2006                           |  | 1.0518556 | 1.0373155 | 1.0665995 |
| Lawlor, 2006, Renfrew/Paisley Study |  | 1.0522847 | 1.0377535 | 1.0670195 |
| Lawlor, 2006, Collaborative Study   |  | 1.0521495 | 1.0376351 | 1.0668671 |
| Price, 2006                         |  | 1.053936  | 1.0394962 | 1.0685763 |
| Schooling, 2006                     |  | 1.0543426 | 1.0398877 | 1.0689986 |
| Baldinger, 2006                     |  | 1.0514857 | 1.0369979 | 1.0661758 |
| Ray, 2006                           |  | 1.0523673 | 1.0378921 | 1.0670444 |
| Freedman, 2006                      |  | 1.0513655 | 1.0368627 | 1.066071  |
| Tice, 2006                          |  | 1.0536325 | 1.0391743 | 1.0682918 |
| Corrada, 2006                       |  | 1.0523286 | 1.03781   | 1.0670502 |
| Gale, 2007                          |  | 1.0522069 | 1.0377221 | 1.0668938 |
| Smith, 2007                         |  | 1.0527197 | 1.0382226 | 1.0674193 |
| Janssen, 2007                       |  | 1.0528154 | 1.0383105 | 1.0675229 |
| Sai, 2007                           |  | 1.0520865 | 1.0375975 | 1.0667776 |
| Greenberg, 2007                     |  | 1.0513816 | 1.03692   | 1.0660449 |
| Al Snih, 2007                       |  | 1.0530558 | 1.0385739 | 1.0677395 |
| Flegal, 2007                        |  | 1.0522    | 1.0376786 | 1.0669246 |
| Mazza, 2007                         |  | 1.0531702 | 1.0386821 | 1.0678605 |
| Simpson, 2007                       |  | 1.0520489 | 1.0375435 | 1.0667571 |
| Locher, 2007                        |  | 1.0525461 | 1.0380589 | 1.0672357 |
| Fujino, 2007                        |  | 1.0523944 | 1.0378755 | 1.0671164 |
| Gelber, 2007                        |  | 1.0514642 | 1.0369645 | 1.0661666 |
| Dolan, 2007                         |  | 1.0528574 | 1.0383554 | 1.0675619 |
| Pischon, 2008                       |  | 1.0511395 | 1.0366436 | 1.065838  |
| Hozawa, 2008                        |  | 1.0517567 | 1.0372831 | 1.0664325 |
| Luchsinger, 2008                    |  | 1.051949  | 1.037469  | 1.066631  |
| Orsini, 2008                        |  | 1.0521444 | 1.037631  | 1.0668608 |
| Kivimaki, 2008                      |  | 1.0508729 | 1.036399  | 1.0655489 |
| Pednekar, 2008                      |  | 1.0530503 | 1.0385755 | 1.0677267 |
| Matsuo, 2008                        |  | 1.051748  | 1.0372375 | 1.0664614 |
| Zhang, 2008                         |  | 1.0511624 | 1.0366986 | 1.0658278 |
| Tsai, 2008                          |  | 1.0511882 | 1.0366976 | 1.0658815 |
| Sauvaget, 2008                      |  | 1.0531188 | 1.0386195 | 1.0678204 |
| Ringback Weitof, 2008               |  | 1.0518637 | 1.0373542 | 1.066576  |
| Moore, 2008                         |  | 1.0510457 | 1.036559  | 1.0657346 |
| Kulminski, 2008                     |  | 1.0528523 | 1.0383489 | 1.0675582 |
| Korkeila, 2009                      |  | 1.0518354 | 1.037338  | 1.0665354 |
| Reuser, 2009                        |  | 1.0516306 | 1.0371268 | 1.0663372 |
| Ferrie, 2009                        |  | 1.0521325 | 1.0376291 | 1.0668387 |
| Guallar-Castillon, 2009             |  | 1.0529807 | 1.0384806 | 1.0676832 |
| Walter, 2009                        |  | 1.0526942 | 1.0381871 | 1.0674042 |

|                        |  |           |           |           |
|------------------------|--|-----------|-----------|-----------|
| Klenk, 2009            |  | 1.0512966 | 1.0367786 | 1.0660179 |
| Wandell, 2009          |  | 1.0517135 | 1.0372396 | 1.0663893 |
| Gulsvik, 2009          |  | 1.0514731 | 1.0369886 | 1.0661601 |
| Stessman, 2009         |  | 1.0529715 | 1.038484  | 1.0676612 |
| Cesari, 2009           |  | 1.0524118 | 1.0379318 | 1.0670936 |
| Neovius, 2009          |  | 1.050784  | 1.0363144 | 1.0654558 |
| Orpana, 2010           |  | 1.0524367 | 1.0379335 | 1.0671427 |
| Iversen, 2010          |  | 1.0524901 | 1.0379832 | 1.0671998 |
| Pierce, 2010           |  | 1.0532118 | 1.038727  | 1.0678985 |
| Arnlov, 2010           |  | 1.0513183 | 1.0368338 | 1.0660051 |
| Odegaard, 2010         |  | 1.0517272 | 1.0372045 | 1.0664532 |
| Vapattanawong, 2010    |  | 1.0536864 | 1.0391973 | 1.0683776 |
| Bellocco, 2010         |  | 1.0517203 | 1.0372185 | 1.0664248 |
| Lantz, 2010            |  | 1.05321   | 1.0387115 | 1.067911  |
| Vessey, 2010           |  | 1.0513855 | 1.0368958 | 1.0660778 |
| Berraho, 2010          |  | 1.0523967 | 1.0378928 | 1.0671031 |
| Atlantis, 2010         |  | 1.0524132 | 1.0379188 | 1.0671101 |
| Nagai, 2010            |  | 1.0516137 | 1.03712   | 1.0663098 |
| Byun, 2010             |  | 1.0519924 | 1.0374781 | 1.0667099 |
| Carlsson, 2011         |  | 1.0509841 | 1.0365107 | 1.0656598 |
| Klijs, 2011            |  | 1.0523336 | 1.0378239 | 1.0670462 |
| Hwang, 2011            |  | 1.0508487 | 1.0363756 | 1.0655239 |
| Lin, 2011              |  | 1.0513705 | 1.0368841 | 1.0660595 |
| Boggs, 2011            |  | 1.0515722 | 1.0370574 | 1.06629   |
| Lisko, 2011            |  | 1.0528039 | 1.0383275 | 1.067482  |
| Wee, 2011              |  | 1.0524356 | 1.0379182 | 1.0671562 |
| Puddu, 2011            |  | 1.0516734 | 1.0371568 | 1.0663933 |
| Cohen-Mansfield, 2011  |  | 1.053184  | 1.0386854 | 1.0678849 |
| Niedhammer, 2011       |  | 1.0525157 | 1.0380312 | 1.0672026 |
| Mehta, 2011            |  | 1.0519315 | 1.0374333 | 1.0666324 |
| Heir, 2011             |  | 1.0513906 | 1.0369091 | 1.0660744 |
| Tsai, 2011             |  | 1.0540464 | 1.0395635 | 1.068731  |
| Tognon, 2011           |  | 1.0529022 | 1.0384099 | 1.0675968 |
| Bessonova, 2011        |  | 1.0518588 | 1.0373245 | 1.0665966 |
| Strand, 2012           |  | 1.0522442 | 1.0377792 | 1.0669107 |
| Pan, 2012              |  | 1.0523888 | 1.0378727 | 1.0671079 |
| Beleigoli, 2012        |  | 1.0530716 | 1.0385746 | 1.0677711 |
| Zunzunegui, 2012       |  | 1.0531421 | 1.0386432 | 1.0678433 |
| Park, 2012             |  | 1.0512594 | 1.036711  | 1.0660118 |
| Katzmarzyk, 2012       |  | 1.0516605 | 1.0371535 | 1.0663706 |
| Fontaine, 2012, PRHHP  |  | 1.0521072 | 1.0375923 | 1.066825  |
| Fontaine, 2012, SAHSI  |  | 1.052521  | 1.0380124 | 1.0672324 |
| Fontaine, 2012, SALSAL |  | 1.0526606 | 1.0381552 | 1.0673686 |
| Jerant, 2012           |  | 1.0522196 | 1.0377095 | 1.0669326 |
| De Hollander, 2012     |  | 1.052386  | 1.0378824 | 1.0670923 |
| Chen, 2012             |  | 1.0512112 | 1.0367213 | 1.0659035 |
| Claessen, 2012         |  | 1.052822  | 1.0383183 | 1.0675282 |
| Rhee, 2012             |  | 1.0522615 | 1.0377846 | 1.0669403 |
| Cohen, 2012            |  | 1.0526212 | 1.0381225 | 1.0673225 |
| Dobson, 2012, ALSWH    |  | 1.0527722 | 1.0382665 | 1.0674806 |
| Dobson, 2012, HMS      |  | 1.0527351 | 1.0382292 | 1.0674436 |
| Hotchkiss, 2013        |  | 1.0531362 | 1.0386384 | 1.0678364 |
| Choi, 2013             |  | 1.0526309 | 1.0381604 | 1.0673032 |
| Schmidt, 2013          |  | 1.0519481 | 1.0374644 | 1.0666339 |
| Yano, 2013             |  | 1.0529414 | 1.0384561 | 1.0676289 |

|                      |  |           |           |           |
|----------------------|--|-----------|-----------|-----------|
| Masters, 2013        |  | 1.0511931 | 1.0361809 | 1.0664229 |
| Hinnouho, 2013       |  | 1.051528  | 1.0370429 | 1.0662155 |
| Takata, 2013         |  | 1.0535129 | 1.0390297 | 1.0681981 |
| Dahl, 2013           |  | 1.0529823 | 1.0384828 | 1.0676843 |
| Stenholm, 2014       |  | 1.0523572 | 1.0378419 | 1.0670755 |
| Singh, 2014          |  | 1.0513859 | 1.0369115 | 1.0660623 |
| Ghaem Maralani, 2014 |  | 1.0521251 | 1.0376254 | 1.0668273 |
| Xiao, 2014           |  | 1.0512894 | 1.0367284 | 1.0660552 |
| McTigue, 2014        |  | 1.0515224 | 1.0369372 | 1.0663127 |
| Buys, 2014           |  | 1.0530193 | 1.0385201 | 1.067721  |
| Ford, 2014           |  | 1.0528319 | 1.0383325 | 1.0675337 |
| Patel, 2014          |  | 1.0507965 | 1.0355952 | 1.0662209 |
| Gao, 2014            |  | 1.0524373 | 1.0379556 | 1.0671209 |
| Liu, 2014            |  | 1.0525409 | 1.0380348 | 1.0672497 |
| Roh, 2014            |  | 1.0518497 | 1.0373198 | 1.0665832 |
| Clark, 2014          |  | 1.0524575 | 1.0379524 | 1.0671651 |
| Wu, 2014             |  | 1.0533456 | 1.0388665 | 1.0680263 |
| Mehta, 2014          |  | 1.0520042 | 1.037514  | 1.0666969 |
| Lee, 2014            |  | 1.052899  | 1.0384107 | 1.0675895 |
| He, 2014             |  | 1.052668  | 1.0381722 | 1.0673661 |
| Kokkinos, 2014       |  | 1.0527353 | 1.0382292 | 1.0674442 |
| Hirani, 2014         |  | 1.0534985 | 1.039009  | 1.0681901 |
| Yiengprugsawan, 2014 |  | 1.0521649 | 1.0376794 | 1.0668526 |
| Suemoto, 2015        |  | 1.0530163 | 1.038519  | 1.067716  |
| Hong, 2015, KLSHA    |  | 1.0529842 | 1.0385126 | 1.0676575 |
| Long, 2015           |  | 1.0517771 | 1.0372812 | 1.0664757 |
| Burman, 2015         |  | 1.0534093 | 1.0389166 | 1.0681041 |
| Kumar, 2015          |  | 1.0529354 | 1.0384326 | 1.0676405 |
| Qizilbash, 2015      |  | 1.0519896 | 1.037181  | 1.0670096 |
| Yi, 2015             |  | 1.0514157 | 1.0366949 | 1.0663455 |
| Lu, 2015             |  | 1.0557687 | 1.0428841 | 1.0688126 |
| Chung, 2015          |  | 1.0530188 | 1.0385212 | 1.0677187 |
| Hong, 2015, KCS      |  | 1.0516946 | 1.0372108 | 1.0663807 |
| Ponce-Garcia, 2015   |  | 1.0519092 | 1.0374281 | 1.0665925 |
| Nakade, 2015         |  | 1.0537977 | 1.0393097 | 1.0684876 |
| Dankner, 2015        |  | 1.0519152 | 1.0374063 | 1.0666269 |
| Ganna, 2015          |  | 1.0521767 | 1.0376562 | 1.0669004 |
| Graf, 2015           |  | 1.0533891 | 1.0389072 | 1.0680728 |
| Mirbolouk, 2015      |  | 1.0526621 | 1.0381796 | 1.0673466 |
| -----                |  |           |           |           |
| Combined             |  | 1.0522014 | 1.0377411 | 1.0668632 |
| -----                |  |           |           |           |
